# Supplementary material
Source: publisher figshare collection journal article supplement (https://acs.figshare.com/ndownloader/files/3950701)
Supplement: Supplementary file 1 [file 3950701]

data_global
_audit_creation_method                  'APEX2 v2013.6-2'

_publ_requested_journal                 ?

_publ_contact_author_name               ?
_publ_contact_author_address            
;
;
_publ_contact_author_email              ?
_publ_contact_author_fax                ?
_publ_contact_author_phone              ?

_publ_section_title                     
;
;
_publ_section_abstract                  
;
;
_publ_section_references                
;
;
_publ_section_comment                   
;
;

data_I
_chemical_name_systematic               ?
_chemical_name_common                   arai39
_chemical_formula_moiety                ?
_chemical_formula_sum                   'C15 H13 N O3 S'
_chemical_formula_iupac                 ?
_chemical_formula_weight                287.32
_chemical_absolute_configuration        ad

_chemical_melting_point                 ?

_space_group_crystal_system             orthorhombic
_space_group_name_H-M_alt               'P 21 21 21'
_space_group_name_Hall                  'P 2ac 2ab'
loop_
    _space_group_symop_operation_xyz
    'x, y, z'
    '-x+1/2, -y, z+1/2'
    '-x, y+1/2, -z+1/2'
    'x+1/2, -y+1/2, -z'

_cell_length_a                          10.0289(12)
_cell_length_b                          11.1264(13)
_cell_length_c                          24.230(3)
_cell_angle_alpha                       90
_cell_angle_beta                        90
_cell_angle_gamma                       90
_cell_volume                            2703.7(5)
_cell_formula_units_Z                   8
_cell_measurement_reflns_used           ?
_cell_measurement_theta_min             ?
_cell_measurement_theta_max             ?
_cell_measurement_temperature           173.(2)

_exptl_crystal_description              prismatic
_exptl_crystal_colour                   colourless
_exptl_crystal_size_max                 0.300
_exptl_crystal_size_mid                 0.200
_exptl_crystal_size_min                 0.100
_exptl_crystal_density_diffrn           1.412
_exptl_crystal_density_meas             ?
_exptl_crystal_density_method           'not measured'
_exptl_crystal_F_000                    1200

_exptl_absorpt_coefficient_mu           0.246
_exptl_absorpt_correction_type          multi-scan
_exptl_absorpt_process_details          'SADABS V2012/1 (Bruker AXS Inc.)'
_exptl_absorpt_correction_T_min         0.92
_exptl_absorpt_correction_T_max         0.98

_exptl_special_details                  'SADABS Sheldrick 1996' 

_diffrn_ambient_temperature             173.(2)

_diffrn_source                          'fine-focus sealed tube'
_diffrn_source_type                     ?

_diffrn_radiation_type                  'MoK\a '
_diffrn_radiation_wavelength            0.71073
_diffrn_radiation_monochromator         'graphite '

_diffrn_measurement_device_type         'Bruker APEX-II CCD'
_diffrn_measurement_method              '\f and \w scans'

_diffrn_detector_area_resol_mean        ?

_diffrn_reflns_number                   15425
_diffrn_reflns_av_R_equivalents         0.0324
_diffrn_reflns_av_sigmaI/netI           0.0474
_diffrn_reflns_theta_min                1.68
_diffrn_reflns_theta_max                28.48
_diffrn_reflns_theta_full               28.48
_diffrn_measured_fraction_theta_max     0.927
_diffrn_measured_fraction_theta_full    0.927
_diffrn_reflns_limit_h_min              -13
_diffrn_reflns_limit_h_max              12
_diffrn_reflns_limit_k_min              -14
_diffrn_reflns_limit_k_max              11
_diffrn_reflns_limit_l_min              -30
_diffrn_reflns_limit_l_max              28

_refine_special_details                 
;
Refinement of F^2^ against ALL reflections.  The weighted R-factor wR and
goodness of fit S are based on F^2^, conventional R-factors R are based
on F, with F set to zero for negative F^2^. The threshold expression of
F^2^ > 2sigma(F^2^) is used only for calculating R-factors(gt) etc. and is
not relevant to the choice of reflections for refinement.  R-factors based
on F^2^ are statistically about twice as large as those based on F, and R-
factors based on ALL data will be even larger.
;

_reflns_number_total                    6102
_reflns_number_gt                       5169
_reflns_threshold_expression            'I > 2\s(I)'

_refine_ls_structure_factor_coef        Fsqd
_refine_ls_matrix_type                  full
_refine_ls_R_factor_all                 0.0532
_refine_ls_R_factor_gt                  0.0400
_refine_ls_wR_factor_gt                 0.0915
_refine_ls_wR_factor_ref                0.1060
_refine_ls_goodness_of_fit_ref          1.064
_refine_ls_restrained_S_all             1.064
_refine_ls_number_reflns                6102
_refine_ls_number_parameters            461
_refine_ls_number_restraints            0
_refine_ls_hydrogen_treatment           mixed
_refine_ls_weighting_scheme             calc
_refine_ls_weighting_details            
    'w=1/[\s^2^(Fo^2^)+(0.0558P)^2^] where P=(Fo^2^+2Fc^2^)/3'

_atom_sites_solution_hydrogens          mixed
_atom_sites_solution_primary            direct
_atom_sites_solution_secondary          difmap

_refine_ls_shift/su_max                 3.365
_refine_ls_shift/su_mean                0.276
_refine_diff_density_max                0.304
_refine_diff_density_min                -0.339
_refine_ls_extinction_method            none
_refine_ls_extinction_coef              ?
_refine_ls_abs_structure_details        
;
Flack x determined using 1884 quotients [(I+)-(I-)]/[(I+)+(I-)]
(Parsons and Flack (2004), Acta Cryst. A60, s61).
;
_refine_ls_abs_structure_Flack          -0.05(3)

loop_
    _atom_type_symbol
    _atom_type_description
    _atom_type_scat_dispersion_real
    _atom_type_scat_dispersion_imag
    _atom_type_scat_source
    C C 0.0033 0.0016 'International Tables Vol C Tables 4.2.6.8 and 6.1.1.4'
    H H 0.0000 0.0000 'International Tables Vol C Tables 4.2.6.8 and 6.1.1.4'
    N N 0.0061 0.0033 'International Tables Vol C Tables 4.2.6.8 and 6.1.1.4'
    O O 0.0106 0.0060 'International Tables Vol C Tables 4.2.6.8 and 6.1.1.4'
    S S 0.1246 0.1234 'International Tables Vol C Tables 4.2.6.8 and 6.1.1.4'

_computing_data_collection              ?
_computing_cell_refinement              ?
_computing_data_reduction               ?
_computing_structure_solution           'SHELXS-97 (Sheldrick, 2008)'
_computing_structure_refinement         'SHELXL-2013 (Sheldrick, 2013)'
_computing_molecular_graphics           ?
_computing_publication_material         ?

loop_
    _atom_site_type_symbol
    _atom_site_label
    _atom_site_fract_x
    _atom_site_fract_y
    _atom_site_fract_z
    _atom_site_U_iso_or_equiv
    _atom_site_adp_type
    _atom_site_calc_flag
    _atom_site_refinement_flags_adp
    _atom_site_refinement_flags_occupancy
    _atom_site_refinement_flags_posn
    _atom_site_occupancy
    _atom_site_disorder_assembly
    _atom_site_disorder_group
    S S1 0.45781(9) 0.16225(9) 0.09497(4) 0.0320(2) Uani d . . . 1 . .
    S S2 0.72052(9) 0.52639(9) 0.19638(4) 0.0356(2) Uani d . . . 1 . .
    C C1 0.5515(3) 0.0123(3) 0.01036(13) 0.0236(7) Uani d . . . 1 . .
    C C2 0.5794(3) 0.0939(3) 0.05288(14) 0.0267(7) Uani d . . . 1 . .
    C C3 0.7117(4) 0.1268(3) 0.06351(15) 0.0285(8) Uani d . . . 1 . .
    C C4 0.8147(4) 0.0789(4) 0.03321(16) 0.0326(8) Uani d . . . 1 . .
    C C5 0.7882(4) -0.0043(3) -0.00807(16) 0.0333(9) Uani d . . . 1 . .
    C C6 0.6582(4) -0.0363(3) -0.01908(15) 0.0299(8) Uani d . . . 1 . .
    C C7 0.4118(4) -0.0276(3) -0.00489(14) 0.0252(7) Uani d . . . 1 . .
    C C8 0.3075(3) 0.0629(3) 0.01579(13) 0.0236(7) Uani d . . . 1 . .
    C C9 0.3103(3) 0.0741(3) 0.07868(13) 0.0247(7) Uani d . . . 1 . .
    C C10 0.1920(3) 0.1352(3) 0.10485(13) 0.0232(7) Uani d . . . 1 . .
    C C11 0.1324(4) 0.0836(3) 0.15064(14) 0.0299(8) Uani d . . . 1 . .
    C C12 0.0228(4) 0.1380(3) 0.17515(17) 0.0352(9) Uani d . . . 1 . .
    C C13 -0.0279(4) 0.2436(4) 0.15469(16) 0.0332(8) Uani d . . . 1 . .
    C C14 0.0315(4) 0.2955(4) 0.10938(16) 0.0342(9) Uani d . . . 1 . .
    C C15 0.1406(4) 0.2427(3) 0.08426(14) 0.0302(8) Uani d . . . 1 . .
    C C16 0.8141(3) 0.7209(3) 0.13349(14) 0.0245(7) Uani d . . . 1 . .
    C C17 0.8410(3) 0.6191(3) 0.16528(14) 0.0265(8) Uani d . . . 1 . .
    C C18 0.9736(4) 0.5891(3) 0.17709(15) 0.0303(8) Uani d . . . 1 . .
    C C19 1.0776(4) 0.6593(4) 0.15841(15) 0.0335(8) Uani d . . . 1 . .
    C C20 1.0511(4) 0.7603(4) 0.12641(16) 0.0337(9) Uani d . . . 1 . .
    C C21 0.9202(4) 0.7892(3) 0.11424(15) 0.0294(8) Uani d . . . 1 . .
    C C22 0.6742(4) 0.7583(3) 0.11734(15) 0.0247(7) Uani d . . . 1 . .
    C C23 0.5725(3) 0.7133(3) 0.16023(14) 0.0235(7) Uani d . . . 1 . .
    C C24 0.5668(4) 0.5770(3) 0.16449(15) 0.0240(7) Uani d . . . 1 . .
    C C25 0.4536(3) 0.5284(3) 0.19920(13) 0.0230(6) Uani d . . . 1 . .
    C C26 0.3798(4) 0.4329(3) 0.17978(16) 0.0311(8) Uani d . . . 1 . .
    C C27 0.2759(4) 0.3853(4) 0.21087(16) 0.0349(9) Uani d . . . 1 . .
    C C28 0.2444(4) 0.4350(4) 0.26103(16) 0.0349(9) Uani d . . . 1 . .
    C C29 0.3180(4) 0.5307(4) 0.28095(15) 0.0380(9) Uani d . . . 1 . .
    C C30 0.4231(4) 0.5768(4) 0.25059(14) 0.0334(8) Uani d . . . 1 . .
    N N1 0.1719(3) 0.0236(3) -0.00319(12) 0.0286(7) Uani d . . . 1 . .
    N N2 0.4366(3) 0.7593(3) 0.14359(13) 0.0311(7) Uani d . . . 1 . .
    O O1 0.3928(3) -0.1447(2) 0.01723(12) 0.0330(6) Uani d . . . 1 . .
    O O2 0.1296(3) 0.0674(2) -0.04601(11) 0.0421(7) Uani d . . . 1 . .
    O O3 0.1115(3) -0.0501(2) 0.02475(11) 0.0375(6) Uani d . . . 1 . .
    O O4 0.6500(3) 0.7120(2) 0.06355(9) 0.0297(6) Uani d . . . 1 . .
    H H4A 0.5729 0.7313 0.0534 0.045 Uiso calc U . R 1 . .
    O O5 0.3718(3) 0.7009(3) 0.11067(11) 0.0401(7) Uani d . . . 1 . .
    O O6 0.3999(3) 0.8544(3) 0.16390(14) 0.0529(8) Uani d . . . 1 . .
    H H1 0.730(5) 0.180(4) 0.0938(19) 0.037(14) Uiso d . . . 1 . .
    H H2 0.909(4) 0.096(3) 0.0434(15) 0.021(10) Uiso d . . . 1 . .
    H H3 0.857(5) -0.033(4) -0.0258(18) 0.042(12) Uiso d . . . 1 . .
    H H4 0.640(4) -0.092(4) -0.0474(17) 0.038(12) Uiso d . . . 1 . .
    H H5 0.403(4) -0.028(3) -0.0435(16) 0.022(10) Uiso d . . . 1 . .
    H H6 0.322(3) 0.140(3) -0.0028(14) 0.020(9) Uiso d . . . 1 . .
    H H7 0.321(4) -0.003(3) 0.0932(14) 0.013(9) Uiso d . . . 1 . .
    H H8 0.173(5) 0.014(4) 0.1671(18) 0.042(12) Uiso d . . . 1 . .
    H H9 -0.014(5) 0.105(4) 0.205(2) 0.041(14) Uiso d . . . 1 . .
    H H10 -0.107(5) 0.276(4) 0.1708(18) 0.036(13) Uiso d . . . 1 . .
    H H11 0.000(6) 0.359(6) 0.097(2) 0.05(2) Uiso d . . . 1 . .
    H H12 0.181(4) 0.275(4) 0.0553(18) 0.036(12) Uiso d . . . 1 . .
    H H13 0.337(6) -0.171(5) 0.001(2) 0.061(19) Uiso d . . . 1 . .
    H H21 0.401(8) 0.390(7) 0.148(3) 0.10(3) Uiso d . . . 1 . .
    H H22 0.224(4) 0.319(4) 0.1988(16) 0.039(12) Uiso d . . . 1 . .
    H H23 0.170(5) 0.403(5) 0.285(2) 0.066(16) Uiso d . . . 1 . .
    H H24 0.300(5) 0.563(4) 0.3183(19) 0.048(13) Uiso d . . . 1 . .
    H H25 0.482(5) 0.639(4) 0.2663(18) 0.061(13) Uiso d . . . 1 . .
    H H14 0.987(5) 0.517(5) 0.199(2) 0.049(15) Uiso d . . . 1 . .
    H H15 1.173(5) 0.641(4) 0.1690(18) 0.046(13) Uiso d . . . 1 . .
    H H16 1.127(5) 0.815(5) 0.1099(19) 0.048(15) Uiso d . . . 1 . .
    H H17 0.904(6) 0.869(5) 0.093(2) 0.040(17) Uiso d . . . 1 . .
    H H18 0.669(4) 0.849(4) 0.1169(15) 0.017(10) Uiso d . . . 1 . .
    H H19 0.583(4) 0.752(3) 0.1973(16) 0.022(11) Uiso d . . . 1 . .
    H H20 0.559(5) 0.547(5) 0.133(2) 0.052(18) Uiso d . . . 1 . .

loop_
    _atom_site_aniso_label
    _atom_site_aniso_U_11
    _atom_site_aniso_U_22
    _atom_site_aniso_U_33
    _atom_site_aniso_U_12
    _atom_site_aniso_U_13
    _atom_site_aniso_U_23
    S1 0.0253(5) 0.0387(5) 0.0319(4) 0.0014(4) -0.0021(4) -0.0127(4)
    S2 0.0232(5) 0.0333(5) 0.0502(6) 0.0025(4) 0.0011(4) 0.0155(4)
    C1 0.0253(17) 0.0224(16) 0.0232(15) 0.0005(13) -0.0005(13) 0.0043(13)
    C2 0.0280(19) 0.0270(18) 0.0250(16) 0.0005(14) -0.0023(14) 0.0026(14)
    C3 0.0258(19) 0.0327(19) 0.0270(18) 0.0016(15) -0.0053(15) -0.0001(15)
    C4 0.026(2) 0.035(2) 0.037(2) 0.0008(15) -0.0036(15) 0.0025(17)
    C5 0.0231(19) 0.038(2) 0.038(2) 0.0047(16) 0.0022(16) -0.0001(17)
    C6 0.032(2) 0.0277(18) 0.0304(18) 0.0012(15) 0.0020(15) -0.0005(15)
    C7 0.0303(19) 0.0248(16) 0.0206(16) -0.0032(14) 0.0033(13) -0.0012(14)
    C8 0.0241(18) 0.0246(17) 0.0221(16) -0.0036(13) -0.0016(13) -0.0002(14)
    C9 0.0277(19) 0.0251(17) 0.0214(16) 0.0028(14) -0.0010(13) 0.0007(14)
    C10 0.0208(17) 0.0269(17) 0.0219(16) -0.0016(13) -0.0015(13) -0.0024(13)
    C11 0.0331(19) 0.0277(19) 0.0290(18) 0.0001(16) 0.0021(16) 0.0024(15)
    C12 0.032(2) 0.038(2) 0.035(2) -0.0078(17) 0.0100(17) -0.0024(17)
    C13 0.0239(19) 0.039(2) 0.037(2) 0.0006(16) 0.0020(17) -0.0090(17)
    C14 0.036(2) 0.034(2) 0.033(2) 0.0131(18) -0.0025(17) 0.0006(17)
    C15 0.037(2) 0.0315(19) 0.0225(18) 0.0020(16) 0.0017(16) 0.0030(15)
    C16 0.0231(18) 0.0248(17) 0.0255(17) 0.0005(14) 0.0005(14) -0.0037(14)
    C17 0.0223(18) 0.0285(18) 0.0287(18) 0.0018(14) 0.0013(14) -0.0040(14)
    C18 0.0277(19) 0.034(2) 0.0295(18) 0.0045(16) -0.0009(15) 0.0001(16)
    C19 0.0221(19) 0.039(2) 0.039(2) 0.0015(16) 0.0001(16) -0.0053(17)
    C20 0.027(2) 0.035(2) 0.039(2) -0.0018(16) 0.0065(17) -0.0029(17)
    C21 0.030(2) 0.0257(18) 0.0329(19) -0.0002(15) 0.0015(15) -0.0028(15)
    C22 0.0238(18) 0.0214(17) 0.0289(18) 0.0005(13) 0.0019(14) 0.0012(14)
    C23 0.0192(17) 0.0237(17) 0.0275(17) 0.0007(13) -0.0029(14) 0.0010(14)
    C24 0.0246(19) 0.0244(17) 0.0230(17) -0.0008(14) 0.0003(14) -0.0023(15)
    C25 0.0210(16) 0.0228(15) 0.0252(15) 0.0015(14) -0.0007(13) 0.0004(14)
    C26 0.034(2) 0.0291(19) 0.0306(19) -0.0038(16) 0.0007(16) -0.0031(16)
    C27 0.028(2) 0.031(2) 0.045(2) -0.0075(17) -0.0034(18) 0.0063(17)
    C28 0.026(2) 0.040(2) 0.039(2) 0.0040(16) 0.0034(16) 0.0163(18)
    C29 0.043(2) 0.043(2) 0.0276(18) 0.0025(19) 0.0094(17) 0.0026(17)
    C30 0.039(2) 0.034(2) 0.0265(18) -0.0042(17) 0.0012(16) -0.0018(16)
    N1 0.0299(16) 0.0293(15) 0.0268(15) 0.0000(13) -0.0009(12) -0.0053(13)
    N2 0.0257(16) 0.0302(17) 0.0375(17) 0.0048(13) 0.0033(14) 0.0091(14)
    O1 0.0370(17) 0.0230(13) 0.0391(15) -0.0031(12) 0.0064(13) -0.0013(11)
    O2 0.0432(16) 0.0409(16) 0.0423(15) 0.0039(13) -0.0204(14) -0.0008(13)
    O3 0.0318(15) 0.0422(16) 0.0387(14) -0.0116(12) 0.0080(12) -0.0065(12)
    O4 0.0300(14) 0.0334(13) 0.0256(12) -0.0025(11) -0.0038(10) 0.0010(10)
    O5 0.0266(14) 0.0522(18) 0.0414(15) -0.0057(13) -0.0092(12) 0.0108(13)
    O6 0.0444(18) 0.0412(18) 0.073(2) 0.0202(14) -0.0003(16) -0.0013(15)

_geom_special_details                   
;
All esds (except the esd in the dihedral angle between two l.s. planes)
are estimated using the full covariance matrix.  The cell esds are taken
into account individually in the estimation of esds in distances, angles
and torsion angles; correlations between esds in cell parameters are only
used when they are defined by crystal symmetry.  An approximate (isotropic)
treatment of cell esds is used for estimating esds involving l.s. planes.
;

loop_
    _geom_bond_atom_site_label_1
    _geom_bond_atom_site_label_2
    _geom_bond_site_symmetry_2
    _geom_bond_distance
    _geom_bond_publ_flag
    S1 C2 . 1.762(4) ?
    S1 C9 . 1.818(4) ?
    S2 C17 . 1.758(4) ?
    S2 C24 . 1.814(4) ?
    C1 C6 . 1.395(5) ?
    C1 C2 . 1.402(5) ?
    C1 C7 . 1.515(5) ?
    C2 C3 . 1.400(5) ?
    C3 C4 . 1.375(5) ?
    C3 H1 . 0.96(5) ?
    C4 C5 . 1.388(5) ?
    C4 H2 . 0.99(4) ?
    C5 C6 . 1.378(5) ?
    C5 H3 . 0.88(5) ?
    C6 H4 . 0.94(4) ?
    C7 O1 . 1.422(4) ?
    C7 C8 . 1.536(5) ?
    C7 H5 . 0.94(4) ?
    C8 N1 . 1.501(4) ?
    C8 C9 . 1.529(5) ?
    C8 H6 . 0.98(4) ?
    C9 C10 . 1.508(5) ?
    C9 H7 . 0.93(4) ?
    C10 C11 . 1.385(5) ?
    C10 C15 . 1.395(5) ?
    C11 C12 . 1.388(5) ?
    C11 H8 . 0.96(4) ?
    C12 C13 . 1.372(6) ?
    C12 H9 . 0.90(5) ?
    C13 C14 . 1.377(6) ?
    C13 H10 . 0.95(5) ?
    C14 C15 . 1.382(5) ?
    C14 H11 . 0.83(6) ?
    C15 H12 . 0.89(4) ?
    C16 C21 . 1.388(5) ?
    C16 C17 . 1.396(5) ?
    C16 C22 . 1.515(5) ?
    C17 C18 . 1.401(5) ?
    C18 C19 . 1.378(5) ?
    C18 H14 . 0.97(5) ?
    C19 C20 . 1.391(6) ?
    C19 H15 . 1.01(5) ?
    C20 C21 . 1.384(6) ?
    C20 H16 . 1.05(5) ?
    C21 H17 . 1.03(6) ?
    C22 O4 . 1.423(4) ?
    C22 C23 . 1.540(5) ?
    C22 H18 . 1.01(4) ?
    C23 N2 . 1.511(4) ?
    C23 C24 . 1.521(5) ?
    C23 H19 . 1.00(4) ?
    C24 C25 . 1.513(5) ?
    C24 H20 . 0.83(5) ?
    C25 C26 . 1.378(5) ?
    C25 C30 . 1.391(5) ?
    C26 C27 . 1.391(5) ?
    C26 H21 . 0.94(7) ?
    C27 C28 . 1.372(6) ?
    C27 H22 . 0.95(4) ?
    C28 C29 . 1.383(6) ?
    C28 H23 . 1.02(5) ?
    C29 C30 . 1.384(5) ?
    C29 H24 . 0.99(4) ?
    C30 H25 . 0.98(5) ?
    N1 O2 . 1.223(4) ?
    N1 O3 . 1.223(4) ?
    N2 O5 . 1.217(4) ?
    N2 O6 . 1.223(4) ?
    O1 H13 . 0.75(5) ?
    O4 H4A . 0.84 ?

loop_
    _geom_angle_atom_site_label_1
    _geom_angle_atom_site_label_2
    _geom_angle_atom_site_label_3
    _geom_angle_site_symmetry_1
    _geom_angle_site_symmetry_3
    _geom_angle
    _geom_angle_publ_flag
    C2 S1 C9 . . 101.79(16) ?
    C17 S2 C24 . . 102.67(16) ?
    C6 C1 C2 . . 118.3(3) ?
    C6 C1 C7 . . 118.1(3) ?
    C2 C1 C7 . . 123.6(3) ?
    C3 C2 C1 . . 119.6(3) ?
    C3 C2 S1 . . 115.9(3) ?
    C1 C2 S1 . . 124.5(3) ?
    C4 C3 C2 . . 120.8(3) ?
    C4 C3 H1 . . 120.(3) ?
    C2 C3 H1 . . 119.(3) ?
    C3 C4 C5 . . 120.0(4) ?
    C3 C4 H2 . . 120.(2) ?
    C5 C4 H2 . . 119.(2) ?
    C6 C5 C4 . . 119.5(4) ?
    C6 C5 H3 . . 124.(3) ?
    C4 C5 H3 . . 117.(3) ?
    C5 C6 C1 . . 121.8(4) ?
    C5 C6 H4 . . 120.(3) ?
    C1 C6 H4 . . 118.(3) ?
    O1 C7 C1 . . 107.5(3) ?
    O1 C7 C8 . . 112.7(3) ?
    C1 C7 C8 . . 111.0(3) ?
    O1 C7 H5 . . 111.(2) ?
    C1 C7 H5 . . 109.(2) ?
    C8 C7 H5 . . 105.(2) ?
    N1 C8 C9 . . 110.2(3) ?
    N1 C8 C7 . . 109.0(3) ?
    C9 C8 C7 . . 111.4(3) ?
    N1 C8 H6 . . 105.(2) ?
    C9 C8 H6 . . 112.7(19) ?
    C7 C8 H6 . . 109.(2) ?
    C10 C9 C8 . . 116.2(3) ?
    C10 C9 S1 . . 107.8(2) ?
    C8 C9 S1 . . 106.0(2) ?
    C10 C9 H7 . . 110.(2) ?
    C8 C9 H7 . . 108.(2) ?
    S1 C9 H7 . . 109.(2) ?
    C11 C10 C15 . . 118.8(3) ?
    C11 C10 C9 . . 119.3(3) ?
    C15 C10 C9 . . 121.8(3) ?
    C10 C11 C12 . . 120.2(4) ?
    C10 C11 H8 . . 119.(3) ?
    C12 C11 H8 . . 121.(3) ?
    C13 C12 C11 . . 120.8(4) ?
    C13 C12 H9 . . 119.(3) ?
    C11 C12 H9 . . 120.(3) ?
    C12 C13 C14 . . 119.1(4) ?
    C12 C13 H10 . . 119.(3) ?
    C14 C13 H10 . . 122.(3) ?
    C13 C14 C15 . . 121.0(4) ?
    C13 C14 H11 . . 118.(4) ?
    C15 C14 H11 . . 121.(4) ?
    C14 C15 C10 . . 120.0(4) ?
    C14 C15 H12 . . 123.(3) ?
    C10 C15 H12 . . 117.(3) ?
    C21 C16 C17 . . 118.8(3) ?
    C21 C16 C22 . . 118.2(3) ?
    C17 C16 C22 . . 122.9(3) ?
    C16 C17 C18 . . 119.2(3) ?
    C16 C17 S2 . . 125.5(3) ?
    C18 C17 S2 . . 115.2(3) ?
    C19 C18 C17 . . 121.1(3) ?
    C19 C18 H14 . . 123.(3) ?
    C17 C18 H14 . . 116.(3) ?
    C18 C19 C20 . . 119.7(4) ?
    C18 C19 H15 . . 121.(3) ?
    C20 C19 H15 . . 119.(3) ?
    C21 C20 C19 . . 119.2(4) ?
    C21 C20 H16 . . 118.(3) ?
    C19 C20 H16 . . 123.(3) ?
    C20 C21 C16 . . 121.9(4) ?
    C20 C21 H17 . . 117.(3) ?
    C16 C21 H17 . . 121.(3) ?
    O4 C22 C16 . . 107.2(3) ?
    O4 C22 C23 . . 112.8(3) ?
    C16 C22 C23 . . 110.5(3) ?
    O4 C22 H18 . . 110.(2) ?
    C16 C22 H18 . . 109.(2) ?
    C23 C22 H18 . . 107.(2) ?
    N2 C23 C24 . . 108.8(3) ?
    N2 C23 C22 . . 107.9(3) ?
    C24 C23 C22 . . 113.3(3) ?
    N2 C23 H19 . . 101.(2) ?
    C24 C23 H19 . . 112.(2) ?
    C22 C23 H19 . . 113.(2) ?
    C25 C24 C23 . . 115.0(3) ?
    C25 C24 S2 . . 106.9(2) ?
    C23 C24 S2 . . 107.8(2) ?
    C25 C24 H20 . . 107.(4) ?
    C23 C24 H20 . . 110.(4) ?
    S2 C24 H20 . . 110.(4) ?
    C26 C25 C30 . . 119.1(3) ?
    C26 C25 C24 . . 119.3(3) ?
    C30 C25 C24 . . 121.6(3) ?
    C25 C26 C27 . . 120.7(4) ?
    C25 C26 H21 . . 124.(5) ?
    C27 C26 H21 . . 115.(5) ?
    C28 C27 C26 . . 119.9(4) ?
    C28 C27 H22 . . 117.(3) ?
    C26 C27 H22 . . 123.(3) ?
    C27 C28 C29 . . 119.8(4) ?
    C27 C28 H23 . . 123.(3) ?
    C29 C28 H23 . . 117.(3) ?
    C28 C29 C30 . . 120.4(4) ?
    C28 C29 H24 . . 120.(3) ?
    C30 C29 H24 . . 120.(3) ?
    C29 C30 C25 . . 120.0(4) ?
    C29 C30 H25 . . 121.(3) ?
    C25 C30 H25 . . 119.(3) ?
    O2 N1 O3 . . 124.4(3) ?
    O2 N1 C8 . . 117.3(3) ?
    O3 N1 C8 . . 118.3(3) ?
    O5 N2 O6 . . 124.4(3) ?
    O5 N2 C23 . . 118.4(3) ?
    O6 N2 C23 . . 117.2(3) ?
    C7 O1 H13 . . 105.(4) ?
    C22 O4 H4A . . 109.4 ?

_shelx_res_file                         
;
TITL arai39_0m in P2(1)2(1)2(1)
CELL 0.71073  10.0289  11.1264  24.2302  90.000  90.000  90.000
ZERR    8.00   0.0012   0.0013   0.0027   0.000   0.000   0.000
LATT -1
SYMM 0.5-X, -Y, 0.5+Z
SYMM -X, 0.5+Y, 0.5-Z
SYMM 0.5+X, 0.5-Y, -Z
SFAC C  H  N  O  S
UNIT 120  104  8  24  8
L.S. 4
ACTA
BOND $H
FMAP 2
PLAN 20
size 0.3 0.2 0.1
TEMP -100
WGHT    0.055800
FVAR       0.29762
MOLE 1
S1    5    0.457812    0.162253    0.094968    11.00000    0.02531    0.03873 =
         0.03190   -0.01274   -0.00210    0.00140
MOLE 2
S2    5    0.720520    0.526389    0.196377    11.00000    0.02323    0.03327 =
         0.05024    0.01551    0.00111    0.00254
MOLE 1
C1    1    0.551460    0.012299    0.010361    11.00000    0.02531    0.02235 =
         0.02322    0.00435   -0.00051    0.00047
C2    1    0.579399    0.093901    0.052882    11.00000    0.02803    0.02698 =
         0.02501    0.00255   -0.00226    0.00050
C3    1    0.711696    0.126766    0.063510    11.00000    0.02582    0.03275 =
         0.02697   -0.00007   -0.00533    0.00156
C4    1    0.814659    0.078875    0.033209    11.00000    0.02576    0.03549 =
         0.03657    0.00253   -0.00357    0.00078
C5    1    0.788247   -0.004331   -0.008072    11.00000    0.02306    0.03827 =
         0.03848   -0.00014    0.00219    0.00472
C6    1    0.658164   -0.036254   -0.019082    11.00000    0.03165    0.02768 =
         0.03043   -0.00046    0.00195    0.00117
C7    1    0.411806   -0.027609   -0.004890    11.00000    0.03035    0.02476 =
         0.02058   -0.00119    0.00327   -0.00319
C8    1    0.307497    0.062898    0.015794    11.00000    0.02409    0.02460 =
         0.02214   -0.00020   -0.00163   -0.00359
C9    1    0.310345    0.074061    0.078678    11.00000    0.02775    0.02506 =
         0.02142    0.00074   -0.00095    0.00280
C10   1    0.191973    0.135153    0.104849    11.00000    0.02077    0.02690 =
         0.02194   -0.00241   -0.00152   -0.00158
C11   1    0.132353    0.083569    0.150637    11.00000    0.03309    0.02766 =
         0.02903    0.00236    0.00210    0.00009
C12   1    0.022819    0.138033    0.175150    11.00000    0.03235    0.03775 =
         0.03545   -0.00236    0.01005   -0.00778
C13   1   -0.027932    0.243556    0.154692    11.00000    0.02394    0.03853 =
         0.03707   -0.00900    0.00199    0.00064
C14   1    0.031542    0.295489    0.109377    11.00000    0.03563    0.03390 =
         0.03293    0.00056   -0.00249    0.01314
C15   1    0.140551    0.242654    0.084263    11.00000    0.03669    0.03152 =
         0.02252    0.00303    0.00173    0.00197
MOLE 2
C16   1    0.814141    0.720933    0.133491    11.00000    0.02310    0.02479 =
         0.02548   -0.00373    0.00046    0.00054
C17   1    0.840954    0.619069    0.165280    11.00000    0.02227    0.02854 =
         0.02867   -0.00396    0.00127    0.00179
C18   1    0.973629    0.589147    0.177089    11.00000    0.02771    0.03383 =
         0.02948    0.00007   -0.00091    0.00448
C19   1    1.077551    0.659253    0.158412    11.00000    0.02209    0.03947 =
         0.03898   -0.00528    0.00013    0.00151
C20   1    1.051106    0.760294    0.126409    11.00000    0.02703    0.03498 =
         0.03907   -0.00294    0.00654   -0.00176
C21   1    0.920175    0.789192    0.114240    11.00000    0.02978    0.02569 =
         0.03286   -0.00281    0.00153   -0.00021
C22   1    0.674218    0.758316    0.117344    11.00000    0.02384    0.02144 =
         0.02888    0.00118    0.00190    0.00049
C23   1    0.572532    0.713309    0.160234    11.00000    0.01921    0.02375 =
         0.02749    0.00100   -0.00292    0.00067
C24   1    0.566776    0.576990    0.164493    11.00000    0.02463    0.02443 =
         0.02297   -0.00231    0.00026   -0.00085
C25   1    0.453592    0.528397    0.199201    11.00000    0.02102    0.02281 =
         0.02516    0.00035   -0.00071    0.00152
C26   1    0.379806    0.432911    0.179782    11.00000    0.03362    0.02914 =
         0.03060   -0.00308    0.00072   -0.00380
C27   1    0.275911    0.385297    0.210870    11.00000    0.02845    0.03105 =
         0.04514    0.00629   -0.00339   -0.00749
C28   1    0.244414    0.435027    0.261030    11.00000    0.02569    0.04013 =
         0.03882    0.01627    0.00344    0.00403
C29   1    0.317993    0.530736    0.280952    11.00000    0.04347    0.04304 =
         0.02762    0.00259    0.00941    0.00251
C30   1    0.423089    0.576785    0.250591    11.00000    0.03920    0.03441 =
         0.02649   -0.00179    0.00123   -0.00416
MOLE 1
N1    3    0.171861    0.023568   -0.003188    11.00000    0.02987    0.02931 =
         0.02675   -0.00526   -0.00088    0.00005
MOLE 2
N2    3    0.436604    0.759298    0.143585    11.00000    0.02571    0.03020 =
         0.03749    0.00910    0.00327    0.00479
MOLE 1
O1    4    0.392795   -0.144718    0.017229    11.00000    0.03696    0.02304 =
         0.03908   -0.00126    0.00643   -0.00311
O2    4    0.129552    0.067409   -0.046011    11.00000    0.04316    0.04086 =
         0.04227   -0.00085   -0.02040    0.00389
O3    4    0.111509   -0.050053    0.024749    11.00000    0.03179    0.04220 =
         0.03865   -0.00648    0.00802   -0.01156
MOLE 2
O4    4    0.649980    0.711961    0.063548    11.00000    0.03004    0.03337 =
         0.02565    0.00095   -0.00384   -0.00249
AFIX  83
H4A   2    0.572857    0.731342    0.053366    11.00000   -1.50000
AFIX   0
O5    4    0.371792    0.700916    0.110669    11.00000    0.02661    0.05215 =
         0.04139    0.01079   -0.00922   -0.00570
O6    4    0.399916    0.854370    0.163903    11.00000    0.04436    0.04120 =
         0.07318   -0.00134   -0.00030    0.02020
H1    2    0.729994    0.180157    0.093751    11.00000    0.03653
H2    2    0.908735    0.096392    0.043390    11.00000    0.02050
H3    2    0.857123   -0.033443   -0.025811    11.00000    0.04182
H4    2    0.639754   -0.091879   -0.047373    11.00000    0.03849
H5    2    0.403112   -0.028050   -0.043474    11.00000    0.02214
H6    2    0.322409    0.139845   -0.002843    11.00000    0.01972
H7    2    0.320693   -0.003031    0.093232    11.00000    0.01312
H8    2    0.173419    0.013889    0.167094    11.00000    0.04153
H9    2   -0.013787    0.105239    0.205494    11.00000    0.04094
H10   2   -0.106726    0.275955    0.170846    11.00000    0.03559
H11   2   -0.000093    0.359404    0.097158    11.00000    0.05105
H12   2    0.181178    0.274717    0.055299    11.00000    0.03578
H13   2    0.337003   -0.171481    0.000930    11.00000    0.06072
H21   2    0.400818    0.389756    0.147621    11.00000    0.10034
H22   2    0.223866    0.319230    0.198806    11.00000    0.03932
H23   2    0.169948    0.403091    0.285496    11.00000    0.06600
H24   2    0.300121    0.562560    0.318341    11.00000    0.04750
H25   2    0.482149    0.638538    0.266272    11.00000    0.06132
H14   2    0.987358    0.516757    0.198854    11.00000    0.04899
H15   2    1.172706    0.641386    0.169005    11.00000    0.04625
H16   2    1.126973    0.814579    0.109927    11.00000    0.04798
H17   2    0.903902    0.868883    0.093357    11.00000    0.04044
H18   2    0.668853    0.849376    0.116905    11.00000    0.01655
H19   2    0.583284    0.752366    0.197311    11.00000    0.02189
H20   2    0.559052    0.547354    0.133018    11.00000    0.05233
HKLF 4

REM  arai39_0m in P2(1)2(1)2(1)
REM R1 =  0.0400 for    5169 Fo > 4sig(Fo)  and  0.0532 for all    6102 data
REM    461 parameters refined using      0 restraints

END

WGHT      0.0569      0.0000

REM Highest difference peak  0.304,  deepest hole -0.339,  1-sigma level  0.116
Q1    1   0.7268  0.6308  0.2109  11.00000  0.05    0.30
Q2    1   0.0225  0.1621  0.2393  11.00000  0.05    0.30
Q3    1   0.4062  0.5843  0.2196  11.00000  0.05    0.29
Q4    1   0.6575  0.5815  0.2297  11.00000  0.05    0.28
Q5    1   0.3984  0.8251  0.2080  11.00000  0.05    0.28
Q6    1  -0.1494  0.1561  0.2421  11.00000  0.05    0.28
Q7    1   0.8462  0.4378  0.2214  11.00000  0.05    0.28
Q8    1   1.2157  0.6053  0.2189  11.00000  0.05    0.28
Q9    1   0.2996  0.4721  0.2710  11.00000  0.05    0.27
Q10   1   0.3464  0.3340  0.2496  11.00000  0.05    0.27
Q11   1   0.4742  0.7169  0.2522  11.00000  0.05    0.27
Q12   1   0.4326  0.6137  0.2498  11.00000  0.05    0.27
Q13   1   0.3818  0.5487  0.2710  11.00000  0.05    0.27
Q14   1   0.0653  0.3776  0.2653  11.00000  0.05    0.27
Q15   1   0.6042  0.5415  0.2503  11.00000  0.05    0.27
Q16   1   0.6982  0.5081  0.2424  11.00000  0.05    0.26
Q17   1   0.0288 -0.0145  0.2282  11.00000  0.05    0.26
Q18   1   0.1377 -0.0596  0.2295  11.00000  0.05    0.26
Q19   1   0.2374  0.1731  0.2383  11.00000  0.05    0.26
Q20   1   0.9565  0.3924  0.2151  11.00000  0.05    0.26
;
_shelx_res_checksum                     37510

_shelx_hkl_file                         
;
   1   0   0 -0.0380 0.14302   1
   2   0   0 24.6796 1.30125   1
   3   0   0 -0.0071 0.48149   1
   4   0   0 508.034 10.5784   1
   5   0   0 0.08450 0.71662   1
   6   0   0 18.4240 2.04487   1
   7   0   0 -0.2465 0.84039   1
   8   0   0 227.221 7.44820   1
   9   0   0 -0.4238 1.05076   1
 -10   0   0 11.9075 2.28892   2
   0  -1   0 -0.7117 0.11616   1
  -1  -1   0 394.095 7.04572   1
   1  -1   0 367.112 7.02394   1
  -2  -1   0 236.280 5.06727   1
  -2   1   0 234.033 4.98547   3
   2  -1   0 237.532 5.17817   1
   3  -1   0 155.763 4.13102   1
   4  -1   0 12.0674 1.42442   1
   4   1   0 13.6270 1.40522   1
   5  -1   0 49.4049 2.65135   1
   5   1   0 48.5222 2.55552   1
   6   1   0 186.919 5.74459   1
   6  -1   0 176.038 5.72721   1
   7  -1   0 0.58491 0.97372   1
  -8  -1   0 37.7360 3.06855   1
   8  -1   0 38.5389 3.05301   1
  -9   1   0 1.00783 1.33365   3
   9  -1   0 -0.1934 1.06273   1
  -9  -1   0 1.17107 1.20236   1
 -10  -1   0 2.47946 1.46228   1
 -10   1   0 2.25105 1.50225   3
 -11  -1   0 44.4485 4.41110   2
 -11   1   0 37.2595 4.03376   3
   0  -2   0 491.949 9.18472   1
  -1   2   0 1.72101 0.55184   3
   1  -2   0 2.25349 0.61961   1
  -1  -2   0 2.34700 0.60909   1
  -2  -2   0 1526.22 26.4343   1
   2  -2   0 1501.92 26.5084   1
  -2   2   0 1527.45 25.6743   3
  -3   2   0 352.351 7.42349   3
  -3  -2   0 349.946 7.51163   1
   3  -2   0 336.413 7.55890   1
  -4  -2   0 44.7062 2.27288   1
  -4   2   0 48.6359 2.35496   3
   4  -2   0 50.2975 2.53215   1
   5  -2   0 34.4738 2.31856   1
  -5  -2   0 31.3875 2.15980   1
  -5   2   0 28.9434 2.16312   3
  -6   2   0 13.9702 1.83942   3
  -6  -2   0 19.7879 2.06252   1
   6  -2   0 15.1586 1.91952   1
  -7   2   0 189.599 6.32656   3
   7  -2   0 190.285 6.51616   1
  -7  -2   0 196.486 6.41023   1
   8  -2   0 0.37504 1.00407   1
  -8  -2   0 1.36317 1.25773   1
  -8   2   0 2.78135 1.37064   3
  -9  -2   0 23.3777 2.81836   1
  -9   2   0 27.8608 3.11673   3
   9  -2   0 25.5979 3.08350   1
 -10   2   0 39.9253 3.87525   3
 -11   2   0 42.2635 4.20929   3
 -11  -2   0 41.1697 4.32412   2
 -12  -2   0 3.26379 2.03183   2
   0  -3   0 0.16900 0.51110   1
  -1   3   0 0.24352 0.47912   3
   1  -3   0 0.23789 0.48624   1
  -1  -3   0 -0.2180 0.48182   1
   2  -3   0 58.3336 2.41375   1
  -2   3   0 60.1280 2.32423   3
  -2  -3   0 60.5697 2.38663   1
  -3   3   0 402.243 6.74175   2
   3  -3   0 403.866 8.86680   1
  -3   3   0 404.167 8.50984   3
  -3  -3   0 394.672 8.64630   1
   4  -3   0 186.965 5.47133   1
  -4   3   0 188.504 3.98546   2
  -4  -3   0 194.289 5.32604   1
  -4   3   0 188.810 5.31820   3
  -5  -3   0 10.3769 1.43238   1
  -5   3   0 9.94895 1.52670   3
   5  -3   0 11.0121 1.61115   1
   6  -3   0 6.78668 1.43779   1
  -6  -3   0 7.69910 1.43149   1
  -6   3   0 6.07780 0.99719   2
  -6   3   0 3.93305 1.22733   3
  -7  -3   0 205.700 6.60468   1
  -7   3   0 206.094 6.65857   3
   7  -3   0 202.005 6.89447   1
   8  -3   0 57.3122 3.83207   1
  -8  -3   0 63.7773 3.74486   1
  -8   3   0 67.7644 3.92536   3
  -9   3   0 39.8581 3.68556   3
  -9  -3   0 45.0722 3.36842   1
   9  -3   0 40.1652 3.92204   1
 -10   3   0 2.02252 1.59902   3
 -11  -3   0 2.69853 1.69285   2
 -11   3   0 3.32445 1.79764   3
 -12  -3   0 -0.2053 1.69316   2
 -13  -3   0 3.29465 2.16870   2
   0  -4   0 221.498 5.58385   1
   1  -4   0 159.441 4.52645   1
  -1  -4   0 159.775 4.52669   1
  -1   4   0 159.915 4.27861   3
  -2  -4   0 53.8509 2.45635   1
  -2   4   0 57.3261 2.49618   3
   2  -4   0 52.1273 2.52166   1
  -3   4   0 5.47201 1.05569   3
   3  -4   0 6.95486 1.23429   1
  -3  -4   0 10.5176 1.38576   1
   4  -4   0 0.52422 0.79882   1
  -4   4   0 0.55392 0.79866   3
  -4  -4   0 2.72759 0.91401   1
  -5   4   0 29.7820 1.27437   2
   5  -4   0 28.6533 2.23166   1
  -5   4   0 30.6583 2.32866   3
  -5  -4   0 29.0543 2.21933   1
   6  -4   0 7.62146 1.64470   1
  -6  -4   0 6.00142 1.44444   1
  -6   4   0 7.90231 1.55442   3
   7  -4   0 262.596 8.37045   1
  -7   4   0 269.918 7.97394   3
  -7  -4   0 274.076 7.97667   1
  -8  -4   0 21.3049 2.54750   1
  -8   4   0 24.6248 2.83773   3
   8  -4   0 19.5735 2.78145   1
  -9   4   0 29.5847 3.22046   3
  -9  -4   0 25.1350 2.99032   1
   9  -4   0 24.3839 3.16605   1
 -10   4   0 5.78116 1.93778   3
 -11  -4   0 31.3346 3.97316   2
 -11   4   0 28.7989 3.68944   3
 -12  -4   0 1.20619 1.89890   2
   0  -5   0 -0.9289 0.53000   1
   1  -5   0 60.1636 2.78558   1
   1  -5   0 57.3252 1.84444   2
  -1  -5   0 54.9781 2.68474   1
  -2   5   0 84.4086 3.30138   3
  -2  -5   0 99.1249 3.64539   1
   2  -5   0 89.8382 3.58688   1
  -3  -5   0 86.7476 3.56110   1
   3  -5   0 80.3775 3.51558   1
  -3   5   0 84.3469 3.46151   3
  -4   5   0 265.545 7.11203   3
  -4  -5   0 268.226 7.22828   1
   4  -5   0 270.977 7.51536   1
  -5   5   0 23.7516 2.35492   3
  -5  -5   0 22.6547 2.34219   1
   5  -5   0 27.4318 2.70639   1
   6  -5   0 5.16344 1.46261   1
  -6   5   0 5.64542 1.47560   3
  -6  -5   0 7.13584 1.52060   1
  -7   5   0 15.7786 2.30470   3
   7  -5   0 21.1325 2.71616   1
  -7  -5   0 13.3349 2.03477   1
  -8  -5   0 93.1609 4.64144   1
   8  -5   0 86.1447 4.90156   1
  -8   5   0 78.8136 4.42794   3
   9  -5   0 23.4188 3.26024   1
  -9   5   0 18.7475 2.65773   3
  -9  -5   0 17.2353 2.58434   1
 -10   5   0 9.66145 2.24528   3
 -11  -5   0 4.97404 2.20585   2
 -12  -5   0 13.8357 3.05112   2
   0  -6   0 81.1720 3.53585   1
   1  -6   0 531.255 9.81832   2
   1  -6   0 529.980 11.9546   1
  -1  -6   0 545.892 12.0245   1
   2  -6   0 5.97171 1.27548   1
  -2  -6   0 6.38694 1.35915   1
  -2   6   0 4.90819 1.18134   3
   3  -6   0 33.7202 2.44775   1
  -3  -6   0 32.1929 2.36174   1
  -3   6   0 31.1749 2.34950   3
  -4   6   0 90.1948 4.02079   3
  -4  -6   0 100.012 4.24261   1
   4  -6   0 105.042 4.43367   1
   5  -6   0 0.91055 0.90850   1
  -5   6   0 0.10483 0.95273   3
  -5  -6   0 0.46082 0.92110   1
  -6  -6   0 15.1723 2.16576   1
  -6   6   0 11.1737 1.96868   3
   6  -6   0 17.3238 2.39273   1
   7  -6   0 55.0459 3.90460   1
  -7   6   0 57.6397 3.68120   3
  -7  -6   0 47.4259 3.43153   1
  -8  -6   0 0.31205 1.18572   1
  -8   6   0 -0.8725 1.20979   3
   8  -6   0 0.05885 1.24977   1
   9  -6   0 28.2960 3.61804   1
  -9   6   0 21.7505 3.00405   3
  -9  -6   0 25.0291 3.11178   1
 -10   6   0 -0.4577 1.53873   3
 -11  -6   0 19.6028 3.58805   2
   0  -7   0 0.10296 0.87615   1
   1  -7   0 4.36459 1.23155   1
   1  -7   0 1.99693 0.70783   2
  -1  -7   0 2.90444 1.12560   1
  -2  -7   0 34.9366 2.57575   1
   2  -7   0 32.4146 2.51210   1
  -3   7   0 13.1026 1.82107   3
  -3  -7   0 14.5685 2.05140   1
   3  -7   0 13.5101 2.04726   1
  -4   7   0 0.33191 0.91323   3
  -4  -7   0 -1.1043 0.81217   1
   4  -7   0 0.56020 0.95831   1
  -5   7   0 21.5792 2.56762   3
   5  -7   0 22.7118 2.77919   1
  -5  -7   0 19.6939 2.48326   1
   6  -7   0 11.3322 2.17301   1
  -6   7   0 11.4850 2.04159   3
  -6  -7   0 13.0294 2.13136   1
   7  -7   0 8.76128 2.02303   1
  -7   7   0 9.36174 1.95099   3
  -7  -7   0 14.8126 2.41144   1
  -8   7   0 8.02216 2.04536   3
   8  -7   0 10.6115 2.39315   1
  -8  -7   0 7.48763 1.98084   1
  -9   7   0 5.72768 1.99012   3
   9  -7   0 6.08913 2.16657   1
  -9  -7   0 5.23434 1.88259   1
 -10  -7   0 10.1541 2.65514   2
 -10   7   0 14.4020 2.79327   3
 -11  -7   0 4.95686 2.15814   2
   0  -8   0 11.8982 1.49414   2
   0  -8   0 8.00071 1.65896   1
   1  -8   0 6.64777 1.51187   1
  -1  -8   0 5.42426 1.49607   1
   2  -8   0 2.32719 1.19087   1
  -2  -8   0 2.64456 1.20161   1
  -3  -8   0 11.2853 2.01813   1
   3  -8   0 11.1281 1.99707   1
   4  -8   0 53.9833 3.60191   1
  -4  -8   0 46.0210 3.31328   1
  -4   8   0 47.5084 3.31055   3
  -5  -8   0 217.580 7.54522   1
   5  -8   0 230.383 8.01071   1
  -5   8   0 220.439 7.37180   3
  -6   8   0 2.83366 1.56390   3
   6  -8   0 2.39817 1.46839   1
  -6  -8   0 4.64007 1.55769   1
   7  -8   0 6.51404 1.96154   1
  -7  -8   0 8.65999 2.05453   1
  -7   8   0 6.86962 2.01954   3
   8  -8   0 13.6788 2.75778   1
  -8  -8   0 19.4659 2.94289   1
  -8   8   0 14.0113 2.58171   3
  -9  -8   0 7.92361 2.17760   1
  -9   8   0 0.05064 1.38745   3
   9  -8   0 2.66113 1.80572   1
 -10  -8   0 -0.2911 1.61059   2
 -10   8   0 0.32708 1.67501   3
   0  -9   0 -1.1529 0.94776   1
  -1  -9   0 7.09498 1.82635   1
   1  -9   0 3.00807 1.33768   1
  -2  -9   0 14.7407 2.34342   1
   2  -9   0 22.8224 2.79638   1
   3  -9   0 18.0762 2.55948   1
  -3  -9   0 15.0325 2.37504   1
  -4  -9   0 2.88393 1.46517   1
   4  -9   0 1.19471 1.29113   1
  -5  -9   0 44.0349 4.01018   1
  -5   9   0 40.1651 3.67277   3
   5  -9   0 46.9894 4.31180   1
   6  -9   0 5.09476 1.74690   1
  -6  -9   0 2.98840 1.56003   1
  -6   9   0 2.82330 1.61564   3
   7  -9   0 0.68459 1.44754   1
  -7  -9   0 1.14518 1.46106   1
  -7   9   0 2.31404 1.60862   3
  -8   9   0 1.40641 1.59593   3
   8  -9   0 1.40147 1.70514   1
  -8  -9   0 -0.1794 1.54003   1
  -9  -9   0 1.80599 1.61596   2
   9  -9   0 2.60209 1.92292   1
  -9   9   0 -0.3579 1.69720   3
  -9  -9   0 0.77068 1.76172   1
 -10   9   0 43.1814 4.65109   3
   0 -10   0 77.8936 4.53017   1
  -1 -10   0 4.84720 1.63445   1
   1 -10   0 7.64107 1.88117   1
   2 -10   0 7.41698 1.98516   1
  -2 -10   0 7.52469 1.95146   1
  -3 -10   0 0.83329 1.20376   2
  -3 -10   0 -0.0956 1.30453   1
   3 -10   0 1.92414 1.45371   1
  -4 -10   0 0.86714 1.45170   1
   4 -10   0 2.99651 1.67116   1
   5 -10   0 5.98695 2.03687   1
  -5 -10   0 1.69572 1.49264   1
   6 -10   0 0.62776 1.51617   1
  -6  10   0 -0.8291 1.23915   3
  -6 -10   0 1.22748 1.61548   1
   7 -10   0 0.39728 1.46457   1
  -7 -10   0 -1.1571 1.31087   1
  -7  10   0 -2.4392 1.27422   3
  -7 -10   0 -0.8727 1.44365   2
  -8  10   0 1.63113 1.77542   3
  -8 -10   0 -1.3315 1.44468   2
   8 -10   0 -0.3589 1.61961   1
  -8 -10   0 0.06402 1.64498   1
  -9 -10   0 42.1356 5.06118   2
   9 -10   0 43.2018 5.12053   1
  -9  10   0 40.9947 4.42142   3
   0 -11   0 0.85673 1.33000   1
   1 -11   0 36.9170 3.79153   1
  -1 -11   0 39.8362 3.97819   1
  -2 -11   0 41.0033 4.01216   1
   2 -11   0 45.3718 4.33995   1
  -3 -11   0 23.3557 3.16078   1
   3 -11   0 22.0688 3.17608   1
   4 -11   0 24.9389 3.40684   1
  -4 -11   0 21.1123 3.07106   1
  -4 -11   0 32.1489 3.63888   2
   5 -11   0 2.02007 1.52575   1
  -5 -11   0 0.85427 1.62450   2
  -5 -11   0 1.53033 1.49753   1
   6 -11   0 54.1062 5.21146   1
  -6 -11   0 45.7241 4.56040   1
  -6 -11   0 50.9850 5.08099   2
   7 -11   0 7.43049 2.69953   1
  -7 -11   0 7.35155 2.28402   1
  -7 -11   0 6.53902 2.45921   2
  -8 -11   0 49.0008 5.36742   2
  -8 -11   0 48.5357 4.98917   1
  -8  11   0 46.0431 4.63693   3
   8 -11   0 55.5342 5.64240   1
   0 -12   0 4.87071 1.96754   1
  -1 -12   0 12.8385 2.56285   1
   1 -12   0 14.2470 2.70950   1
   2 -12   0 46.4503 4.55006   1
  -2 -12   0 47.4837 4.57119   1
  -3 -12   0 4.70950 1.87191   1
   3 -12   0 6.86457 2.18256   1
  -4 -12   0 1.03174 1.57919   1
   4 -12   0 -0.0164 1.55611   1
  -5 -12   0 -1.0481 1.46695   1
   5 -12   0 1.11122 1.82518   1
  -6 -12   0 2.43562 2.04034   2
   6 -12   0 1.62712 1.74895   1
  -6 -12   0 -1.5893 1.56005   1
  -7 -12   0 0.28377 1.78270   1
  -7 -12   0 1.12419 1.79832   2
   7 -12   0 4.33579 2.45765   1
  -8 -12   0 4.35467 2.22387   1
   0 -13   0 0.63705 1.56365   1
  -1 -13   0 4.73668 2.04304   1
   1 -13   0 1.76495 1.78081   1
   2 -13   0 1.39062 1.72120   1
  -2 -13   0 1.49467 1.76110   1
  -3 -13   0 15.5646 3.10389   1
   3 -13   0 15.8703 3.09629   1
  -4 -13   0 3.12381 1.85533   1
   4 -13   0 0.77837 1.74702   1
  -5 -13   0 0.47815 1.66146   1
   5 -13   0 -2.6944 1.47240   1
  -6 -13   0 17.9685 3.30389   1
   0 -14   0 14.2138 3.11870   1
  -1 -14   0 1.80922 1.81569   1
   1 -14   0 3.07858 1.83367   1
  -2 -14   0 0.44170 1.72792   1
  -1   0  -1 276.102 4.92019   2
   2   0   1 122.965 2.93490   1
   2   0  -1 120.881 3.23384   1
   3   0   1 336.147 7.03876   1
   3   0  -1 341.649 7.38904   1
   4   0  -1 120.622 4.00192   1
   4   0   1 131.425 3.84029   1
   5   0  -1 31.5964 2.18293   1
   5   0   1 27.7126 1.95648   1
   6   0   1 68.3489 3.23345   1
   6   0  -1 71.9861 3.43704   1
   7   0   1 347.565 9.11052   1
   7   0  -1 348.221 9.41672   1
   8   0   1 9.73041 1.86814   1
   8   0  -1 9.97116 1.99727   1
   9   0  -1 10.7673 2.07790   1
  -9   0  -1 12.7915 2.20137   2
   9   0   1 7.93111 1.80187   1
  10   0  -1 -0.0097 1.35712   1
 -10   0  -1 2.30126 1.42943   2
   0  -1  -1 39.9970 1.12688   1
  -1   1   1 579.336 9.70397   3
  -1  -1  -1 570.020 9.96544   1
   1  -1   1 570.248 10.0313   1
   1  -1  -1 553.845 10.2359   1
  -1  -1   1 574.827 10.2777   1
   1  -1  -1 564.732 9.21632   2
  -1   1  -1 573.016 9.95981   3
  -2   1   1 67.8423 2.07150   3
  -2  -1  -1 65.6937 2.05308   1
   2  -1   1 65.6035 2.07872   1
  -2   1  -1 70.8855 2.35257   3
  -2  -1   1 70.4202 2.35623   1
  -2   1  -1 70.6434 1.81226   2
   2  -1  -1 72.1828 2.37536   1
  -3   1   1 412.286 8.20282   3
  -3  -1  -1 410.760 8.34602   1
   3  -1   1 416.797 8.41326   1
   3   1  -1 416.581 8.61658   1
   3  -1  -1 404.696 8.65858   1
   4   1  -1 650.575 13.1541   1
   4  -1   1 659.553 12.9883   1
   4  -1  -1 656.877 13.3118   1
   5   1  -1 -0.3708 0.67522   1
   5  -1   1 -0.2326 0.66658   1
   5  -1  -1 -0.0686 0.74180   1
   6   1  -1 112.127 4.40238   1
   6  -1   1 109.808 4.23659   1
   6  -1  -1 122.845 4.64424   1
   7  -1   1 91.4992 4.17029   1
   7   1  -1 101.926 4.45077   1
   7  -1  -1 95.6315 4.44651   1
   8  -1   1 78.9491 4.07922   1
  -8  -1  -1 74.0317 3.99402   1
  -8   1  -1 74.5181 3.83496   2
   8  -1  -1 66.3947 4.00958   1
  -9  -1  -1 53.3994 3.66363   1
   9  -1   1 53.4655 3.64399   1
  -9   1   1 53.9382 3.66651   3
  -9   1  -1 56.6593 3.51617   2
  -9  -1   1 51.7802 3.76786   1
   9  -1  -1 67.9099 4.16700   1
 -10   1   1 1.18592 1.35034   3
 -10  -1  -1 1.83620 1.53477   2
 -10   1  -1 3.61762 1.69700   3
  10  -1  -1 0.82398 1.32283   1
 -10  -1   1 3.15239 1.60223   1
 -11  -1  -1 6.82632 2.12065   2
 -11   1  -1 2.88980 1.81445   3
   0  -2  -1 1785.66 30.5754   1
   0  -2  -1 1830.85 28.9096   2
   0  -2   1 1774.25 30.5941   1
   1  -2   1 238.230 5.07458   1
  -1   2   1 245.940 4.89743   3
  -1  -2  -1 240.920 5.04452   1
   1  -2  -1 236.807 5.18807   1
  -1  -2   1 241.866 5.18286   1
  -2  -2  -1 306.138 6.35673   1
  -2   2   1 312.697 6.26113   3
   2  -2   1 306.703 6.45376   1
  -2  -2   1 304.024 6.61033   1
  -2   2  -1 314.605 5.24191   2
   2  -2  -1 306.035 6.67558   1
  -3  -2  -1 43.8677 1.92490   1
   3  -2   1 49.1318 2.05736   1
  -3   2   1 45.8515 2.00647   3
  -3  -2   1 40.6094 2.02395   1
  -3   2  -1 43.9773 2.09733   3
  -3   2  -1 44.6019 1.47608   2
  -4  -2  -1 165.592 4.60143   1
  -4   2   1 164.039 4.60040   3
   4  -2   1 172.631 4.84597   1
   4  -2  -1 169.334 5.02374   1
  -4   2  -1 157.755 4.76811   3
  -4  -2   1 158.481 4.81733   1
  -4   2  -1 157.908 3.85923   2
   5  -2   1 140.456 4.70476   1
  -5   2   1 142.350 4.59809   3
  -5  -2  -1 144.828 4.60798   1
   5  -2  -1 151.513 5.04629   1
  -5  -2   1 151.399 4.88642   1
  -5   2  -1 150.725 4.01704   2
  -5   2  -1 145.138 4.79262   3
  -6   2   1 59.1662 3.04960   3
  -6  -2  -1 53.8516 2.91823   1
   6  -2   1 55.5394 3.05993   1
  -6   2  -1 57.1082 3.12261   3
  -6   2  -1 58.4510 2.62456   2
   6  -2  -1 62.6979 3.30847   1
  -6  -2   1 62.1445 3.27499   1
   7  -2   1 219.722 6.98294   1
  -7   2   1 232.313 6.89390   3
  -7  -2  -1 220.015 6.80760   1
   7  -2  -1 242.752 7.49232   1
  -7  -2   1 218.639 7.07535   1
  -7   2  -1 223.096 7.07274   3
  -7   2  -1 224.548 6.13616   2
  -8  -2  -1 91.0724 4.38366   1
  -8   2   1 85.4629 4.27336   3
   8  -2   1 83.1073 4.32542   1
   8  -2  -1 92.7554 4.64248   1
  -8   2  -1 80.6716 4.38545   3
  -8  -2   1 83.2442 4.39954   1
  -8   2  -1 80.4721 3.84227   2
  -9   2   1 33.9284 3.33729   3
  -9  -2  -1 42.3296 3.70557   1
   9  -2   1 40.3541 3.70746   1
  -9  -2   1 40.7170 3.77684   1
   9  -2  -1 42.2018 3.98888   1
  -9   2  -1 44.9340 3.52132   3
 -10   2   1 12.1912 2.30025   3
 -10  -2  -1 16.3878 2.72626   2
 -10   2  -1 14.5506 2.58210   3
 -10  -2   1 10.6604 2.28585   1
  10  -2  -1 16.4313 2.79214   1
 -11  -2  -1 8.32013 2.37305   2
 -11   2  -1 5.26812 2.02298   3
 -12  -2  -1 4.93917 2.20137   2
 -12  -2   1 6.39151 2.35093   2
   0  -3   1 1146.58 20.6716   1
   0  -3  -1 1167.28 19.2203   2
   0  -3  -1 1158.03 20.6630   1
  -1  -3  -1 359.440 7.46031   1
   1  -3   1 355.032 7.48468   1
  -1   3   1 349.727 7.08465   3
  -1   3  -1 367.785 7.32962   3
   1  -3  -1 360.003 6.10757   2
  -1  -3   1 357.166 7.53307   1
   1  -3  -1 346.105 7.52631   1
  -2   3   1 275.392 6.02429   3
  -2  -3  -1 283.340 6.24907   1
   2  -3   1 264.982 6.28324   1
  -2   3  -1 282.054 6.24644   3
   2  -3  -1 278.323 6.46844   1
  -2  -3   1 283.414 6.41844   1
  -3   3   1 46.4128 2.13174   3
   3  -3   1 42.6508 2.19694   1
  -3  -3  -1 44.2564 2.06262   1
  -3   3  -1 43.4789 2.20037   3
  -3  -3   1 51.1922 2.34599   1
   3  -3  -1 45.6877 2.32161   1
  -3   3  -1 46.9801 1.16771   2
   4  -3   1 697.373 14.2312   1
  -4   3   1 693.651 13.7209   3
  -4  -3  -1 697.039 13.9872   1
  -4   3  -1 717.070 12.1052   2
   4  -3  -1 741.266 14.6386   1
  -4   3  -1 700.536 14.0632   3
  -4  -3   1 698.985 14.2991   1
  -5  -3  -1 120.450 4.11987   1
   5  -3   1 115.158 4.35645   1
  -5   3   1 120.907 4.19107   3
  -5  -3   1 124.040 4.40998   1
  -5   3  -1 119.550 4.32615   3
   5  -3  -1 122.988 4.61644   1
  -5   3  -1 115.323 3.16399   2
  -6  -3  -1 31.1991 2.29799   1
   6  -3   1 29.7751 2.40305   1
  -6   3   1 33.6794 2.42505   3
  -6  -3   1 31.4151 2.37973   1
  -6   3  -1 35.8129 2.55973   3
  -6   3  -1 33.0237 1.85011   2
   6  -3  -1 31.7261 2.49715   1
  -7  -3  -1 38.9247 2.74357   1
  -7   3   1 36.1149 2.75484   3
   7  -3   1 35.5613 2.81229   1
   7  -3  -1 34.8192 3.32486   1
  -7   3  -1 36.7756 2.80974   3
  -7  -3   1 34.7143 2.70629   1
  -8   3   1 130.354 5.36868   3
   8  -3   1 124.969 5.49856   1
  -8  -3  -1 124.865 5.23624   1
  -8   3  -1 141.347 5.74291   3
   8  -3  -1 141.507 5.95489   1
  -8  -3   1 145.840 5.80259   1
   9  -3   1 59.7136 3.99875   1
  -9   3   1 66.1521 3.99235   3
  -9  -3  -1 60.6510 3.79760   1
  -9  -3   1 57.3385 3.91608   1
   9  -3  -1 67.8895 4.35891   1
  -9   3  -1 61.7033 3.96592   3
 -10   3   1 36.6058 3.73444   3
 -10  -3  -1 37.5915 4.00844   2
  10  -3  -1 39.4601 4.18962   1
 -10   3  -1 34.7734 3.75336   3
 -10  -3   1 32.8154 3.65119   1
 -11  -3  -1 17.8115 3.15395   2
 -11   3  -1 21.6462 3.19970   3
 -12  -3  -1 5.45074 2.25725   2
 -12  -3   1 2.70062 1.87806   2
 -13  -3  -1 12.2591 2.92370   2
 -13  -3   1 10.0782 2.67745   2
   0  -4  -1 121.318 3.08351   2
   0  -4   1 113.584 3.68581   1
  -1  -4  -1 38.7951 2.00889   1
   1  -4   1 40.6174 2.05372   1
  -1   4  -1 39.9070 1.95667   3
  -1  -4   1 44.0355 2.13937   1
   1  -4  -1 37.8967 2.02255   1
   1  -4  -1 38.0404 1.28853   2
  -2  -4  -1 263.940 6.42227   1
  -2   4   1 266.032 6.16850   3
   2  -4   1 257.538 6.46074   1
  -2  -4   1 268.040 6.53509   1
   2  -4  -1 260.223 6.57734   1
  -2   4  -1 265.724 6.31974   3
   3  -4   1 228.803 6.14402   1
  -3   4   1 228.834 5.85862   3
  -3  -4  -1 241.166 6.08297   1
  -3   4  -1 236.760 6.07202   3
  -3  -4   1 236.008 6.22854   1
   3  -4  -1 235.217 6.39856   1
   4  -4   1 15.9098 1.82431   1
  -4   4   1 14.1825 1.64330   3
  -4  -4  -1 18.1110 1.80670   1
  -4   4  -1 12.2482 1.55930   3
   4  -4  -1 20.5441 2.13960   1
  -4  -4   1 16.1069 1.78147   1
   5  -4   1 292.728 7.87242   1
  -5  -4  -1 286.045 7.50799   1
  -5   4   1 294.342 7.49047   3
  -5   4   1 291.455 5.63306   2
  -5  -4   1 280.962 7.69263   1
  -5   4  -1 288.684 7.70312   3
  -5   4  -1 289.058 5.48468   2
   6  -4   1 3.50966 1.24201   1
  -6  -4  -1 8.06029 1.48758   1
  -6   4   1 4.83306 1.36276   3
  -6   4  -1 5.55283 1.43657   3
  -6  -4   1 7.02028 1.47568   1
   6  -4  -1 5.95080 1.47508   1
   7  -4   1 8.96791 1.88077   1
  -7  -4  -1 6.27261 1.54584   1
  -7   4   1 5.69121 1.55941   3
   7  -4  -1 7.34271 1.69984   1
  -7  -4   1 8.81212 1.80260   1
  -7   4  -1 7.24134 1.73401   3
  -8  -4  -1 86.6619 4.31336   1
   8  -4   1 90.5458 4.72045   1
  -8   4   1 82.4180 4.32331   3
   8  -4  -1 81.0783 4.66562   1
  -8  -4   1 92.3112 4.54970   1
  -8   4  -1 82.8367 4.41210   3
   9  -4   1 -1.4589 1.06652   1
  -9   4   1 1.47281 1.33486   3
  -9  -4  -1 3.10333 1.37499   1
  -9   4  -1 -0.1191 1.31906   3
  -9  -4   1 2.61807 1.40542   1
   9  -4  -1 0.47968 1.32980   1
 -10   4   1 11.3864 2.37511   3
 -10  -4  -1 10.2626 2.35109   2
 -10   4  -1 7.53489 2.11693   3
  10  -4  -1 8.40170 2.31915   1
 -10  -4   1 7.34758 2.07560   1
 -11  -4  -1 2.88833 1.96993   2
 -11   4  -1 0.41201 1.65028   3
 -12  -4  -1 -0.4079 1.75447   2
 -12  -4   1 -0.7869 1.46410   2
   0  -5   1 90.3951 3.43705   1
   0  -5  -1 90.2528 3.43545   1
   0  -5  -1 87.1209 2.75730   2
  -1  -5  -1 133.612 4.36060   1
   1  -5   1 135.089 4.39533   1
   1  -5  -1 135.829 3.14817   2
  -1  -5   1 133.792 4.38621   1
   1  -5  -1 135.297 4.41461   1
   2  -5   1 149.667 4.79157   1
  -2  -5  -1 151.633 4.76964   1
  -2   5   1 150.885 4.51740   3
   2  -5  -1 151.576 2.80618   2
   2  -5  -1 152.398 4.90126   1
  -2   5  -1 148.440 4.59239   3
  -2  -5   1 157.637 4.90788   1
  -3  -5  -1 180.184 5.43318   1
   3  -5   1 181.491 5.57133   1
  -3   5   1 175.285 5.22089   3
   3  -5  -1 172.243 5.54474   1
  -3  -5   1 186.638 5.55559   1
  -3   5  -1 182.846 5.37075   3
   4  -5   1 153.045 5.24905   1
  -4  -5  -1 155.463 5.07174   1
  -4   5   1 145.024 4.81845   3
  -4   5  -1 152.261 5.07111   3
  -4  -5   1 158.222 5.20324   1
   4  -5  -1 160.349 5.51103   1
  -5   5   1 26.3592 2.45072   3
   5  -5   1 21.8866 2.45140   1
  -5  -5  -1 24.2680 2.31659   1
   5  -5  -1 27.1653 2.70481   1
  -5   5  -1 22.4702 2.30064   3
  -5  -5   1 21.9707 2.26513   1
   6  -5   1 62.0787 3.62748   1
  -6   5   1 61.4759 3.45489   3
  -6  -5  -1 57.5485 3.30504   1
  -6   5  -1 58.9097 3.47802   3
   6  -5  -1 66.9347 3.97712   1
  -6  -5   1 67.0804 3.66024   1
  -7   5   1 147.297 5.70531   3
   7  -5   1 148.855 6.15358   1
  -7  -5  -1 167.257 5.91059   1
  -7   5  -1 162.139 6.09019   3
   7  -5  -1 143.981 6.18248   1
  -7  -5   1 160.819 6.02147   1
  -8   5   1 42.8922 3.25021   3
   8  -5   1 38.4613 3.75198   1
  -8  -5  -1 39.3943 3.08997   1
   8  -5  -1 37.6966 3.88792   1
  -8   5  -1 38.6141 3.54711   3
  -8  -5   1 33.7273 3.31660   1
   9  -5   1 26.5640 3.31828   1
  -9  -5  -1 24.1115 2.98061   1
  -9   5   1 23.5082 2.97763   3
  -9  -5   1 17.2060 2.68019   1
  -9   5  -1 18.7210 2.72031   3
   9  -5  -1 26.3958 3.45177   1
 -10  -5  -1 31.6347 3.96476   2
 -10   5   1 42.7403 4.02627   3
  10  -5  -1 45.1316 4.66138   1
 -10  -5   1 36.7427 3.91264   1
 -10   5  -1 34.7610 3.91292   3
 -11  -5  -1 2.47810 1.98772   2
 -11   5  -1 0.91292 1.73864   3
 -12  -5  -1 11.6275 2.91453   2
 -12  -5   1 9.59020 2.76221   2
   0  -6  -1 95.2957 3.11947   2
   0  -6  -1 98.4190 3.90746   1
   0  -6   1 93.7275 3.87127   1
  -1  -6  -1 29.2214 2.23414   1
   1  -6   1 29.7302 2.23182   1
   1  -6  -1 26.0044 2.06572   1
  -1  -6   1 27.3202 2.45895   1
   1  -6  -1 24.4731 1.39216   2
   2  -6   1 206.413 6.17933   1
  -2  -6  -1 202.462 6.08101   1
  -2   6  -1 211.552 5.95966   3
  -2  -6   1 202.584 6.16882   1
   2  -6  -1 198.415 6.22526   1
  -3   6   1 6.30095 1.25707   3
   3  -6   1 8.07021 1.48254   1
  -3  -6  -1 8.91510 1.48553   1
  -3   6  -1 9.07354 1.56341   3
   3  -6  -1 9.74340 1.65959   1
  -3  -6   1 7.51949 1.44055   1
  -4  -6  -1 142.161 5.10054   1
   4  -6   1 138.313 5.23842   1
  -4   6   1 135.232 4.89397   3
  -4  -6   1 140.151 5.14059   1
   4  -6  -1 143.864 5.42424   1
  -4   6  -1 137.771 5.03578   3
  -5   6   1 117.969 4.63640   3
  -5  -6  -1 113.895 4.69457   1
   5  -6   1 120.282 5.02710   1
  -5  -6   1 117.970 4.80433   1
  -5   6  -1 118.501 4.76080   3
   5  -6  -1 121.809 5.14195   1
  -6  -6  -1 55.6718 3.36125   1
  -6   6   1 59.9310 3.44006   3
   6  -6   1 56.1545 3.62499   1
  -6  -6   1 61.7010 3.59862   1
   6  -6  -1 59.5743 3.84048   1
  -6   6  -1 65.2172 3.71074   3
   7  -6   1 7.80248 1.90624   1
  -7   6   1 11.9474 2.07781   3
  -7  -6  -1 9.88303 1.94914   1
  -7  -6   1 10.1228 1.98323   1
   7  -6  -1 7.55909 1.97582   1
  -7   6  -1 11.2739 2.05920   3
  -8  -6  -1 3.97307 1.49546   1
  -8   6   1 0.66205 1.29487   3
   8  -6   1 3.64663 1.68395   1
  -8  -6   1 5.81518 1.73482   1
   8  -6  -1 5.37701 1.89025   1
  -8   6  -1 3.72350 1.60660   3
  -9   6   1 9.78153 2.19347   3
   9  -6   1 4.03504 1.84263   1
  -9  -6  -1 4.64163 1.70585   1
  -9  -6   1 4.33754 1.70898   1
   9  -6  -1 2.33642 1.75703   1
  -9   6  -1 5.59783 1.80901   3
 -10   6   1 15.7323 2.77656   3
 -10  -6  -1 11.5038 2.81812   2
  10  -6  -1 16.1907 3.03268   1
 -10  -6   1 16.9711 2.84859   1
 -10   6  -1 15.2440 2.79083   3
 -11  -6  -1 38.5618 4.75514   2
 -11   6  -1 39.6530 4.35850   3
   0  -7  -1 36.5411 2.00251   2
   0  -7   1 28.4120 2.32033   1
   0  -7  -1 34.3759 2.49457   1
  -1  -7  -1 316.079 7.48666   2
   1  -7   1 303.244 8.37492   1
  -1  -7  -1 309.003 8.38877   1
   1  -7  -1 301.966 8.36939   1
   1  -7  -1 296.525 6.36422   2
  -1  -7   1 307.932 8.43770   1
   2  -7   1 59.4707 3.33439   1
  -2  -7  -1 52.2845 3.09704   1
  -2  -7   1 54.4973 3.18077   1
   2  -7  -1 57.8759 3.31496   1
  -3  -7  -1 13.5627 1.94072   1
  -3   7   1 14.6077 1.94097   3
   3  -7   1 14.2647 2.02260   1
  -3  -7   1 10.7978 1.77601   1
   3  -7  -1 16.0661 2.15563   1
  -3   7  -1 11.7303 1.82871   3
  -4   7   1 38.9144 2.72157   3
   4  -7   1 46.3245 3.17708   1
  -4  -7  -1 42.8611 2.96320   1
  -4   7  -1 44.9809 3.04240   3
  -4  -7   1 43.0728 3.00270   1
   4  -7  -1 43.8354 3.09513   1
  -5  -7  -1 384.295 10.4355   1
  -5   7   1 369.823 10.0400   3
   5  -7   1 397.569 10.8518   1
  -5  -7   1 416.916 10.8148   1
  -5   7  -1 403.380 10.5054   3
   5  -7  -1 413.419 11.2344   1
  -6   7   1 40.9237 3.54914   3
   6  -7   1 37.3534 3.66596   1
  -6  -7  -1 39.3310 2.97786   1
  -6  -7   1 40.6427 3.20262   1
  -6   7  -1 34.1118 3.21991   3
   6  -7  -1 39.9349 3.76994   1
  -7  -7  -1 11.7561 2.17958   1
  -7   7   1 15.3392 2.34235   3
   7  -7   1 11.6383 2.26652   1
  -7  -7   1 11.8754 2.21448   1
  -7   7  -1 13.3838 2.35994   3
   7  -7  -1 8.63490 2.19018   1
   8  -7   1 38.7107 4.10856   1
  -8   7   1 33.5365 3.46329   3
  -8  -7  -1 38.5748 3.67773   1
  -8   7  -1 35.3185 3.62199   3
  -8  -7   1 35.6881 3.67568   1
   8  -7  -1 38.7513 4.23743   1
  -9  -7  -1 -1.2616 1.26324   2
  -9   7   1 1.81288 1.50490   3
   9  -7   1 -0.5382 1.37146   1
  -9  -7   1 -1.7831 1.22114   1
   9  -7  -1 1.40287 1.64865   1
  -9   7  -1 0.08221 1.45956   3
 -10   7   1 29.4320 3.58794   3
 -10  -7  -1 28.2519 3.99708   2
 -10   7  -1 30.2830 3.72695   3
  10  -7  -1 36.5569 4.39965   1
 -11  -7  -1 18.5077 3.40410   2
 -11  -7   1 21.1820 3.59225   2
 -11   7  -1 17.0323 3.14988   3
   0  -8  -1 55.0634 2.64052   2
   0  -8   1 54.1604 3.32957   1
   0  -8  -1 58.2239 3.50223   1
   1  -8   1 40.4844 2.89155   1
  -1  -8  -1 37.2917 2.46371   2
  -1  -8  -1 39.9345 2.89434   1
   1  -8  -1 36.2851 2.78152   1
  -1  -8   1 42.3067 2.98085   1
  -2  -8  -1 7.37737 1.50274   2
  -2  -8  -1 7.09337 1.64167   1
   2  -8   1 8.72624 1.75664   1
  -2  -8   1 4.61176 1.41225   1
   2  -8  -1 5.60238 1.51349   1
   3  -8   1 2.56612 1.27265   1
  -3  -8  -1 5.68328 1.49807   1
  -3  -8   1 3.51742 1.40221   1
   3  -8  -1 2.08136 1.16900   1
   4  -8   1 163.170 6.33906   1
  -4   8   1 159.894 5.87873   3
  -4  -8  -1 164.869 6.16488   1
   4  -8  -1 160.434 6.38698   1
  -4   8  -1 161.310 6.01526   3
  -4  -8   1 158.700 6.17614   1
   5  -8   1 18.6202 2.70909   1
  -5  -8  -1 17.1032 2.47278   1
  -5   8   1 19.4347 2.51126   3
  -5   8  -1 17.9512 2.49223   3
   5  -8  -1 15.0751 2.49501   1
  -5  -8   1 19.2372 2.65056   1
   6  -8   1 58.2777 4.01431   1
  -6  -8  -1 56.3772 3.76600   1
  -6   8   1 60.4122 3.91529   3
   6  -8  -1 64.5468 4.28517   1
  -6  -8   1 66.5326 4.18577   1
  -6   8  -1 56.2781 3.87854   3
  -7  -8  -1 183.204 7.12721   1
   7  -8   1 193.930 7.73872   1
  -7   8   1 172.899 6.90663   3
  -7   8  -1 176.697 7.09183   3
  -7  -8   1 182.181 7.24391   1
   7  -8  -1 195.500 7.83698   1
   8  -8   1 7.81623 2.31559   1
  -8  -8  -1 5.08426 2.07301   2
  -8   8   1 8.51407 2.27049   3
  -8  -8  -1 7.63959 2.02575   1
  -8  -8   1 7.79201 2.14533   1
   8  -8  -1 9.15797 2.46919   1
  -8   8  -1 5.29492 1.83115   3
  -9   8   1 10.9938 2.54782   3
   9  -8   1 19.3465 3.21394   1
  -9  -8  -1 7.71033 2.32777   2
  -9   8  -1 17.6605 2.95983   3
   9  -8  -1 18.3029 3.30543   1
  -9  -8   1 14.2916 2.77230   1
 -10  -8  -1 3.47161 2.12760   2
 -10   8  -1 5.33558 2.12535   3
  10  -8  -1 4.93033 2.40311   1
   0  -9   1 64.2377 3.88324   1
   0  -9  -1 58.8611 3.74479   1
  -1  -9  -1 18.4123 2.46781   1
   1  -9   1 18.2032 2.49599   1
   1  -9  -1 20.5939 2.59341   1
  -1  -9   1 19.1581 2.55874   1
   2  -9   1 14.9487 2.28125   1
  -2  -9  -1 18.0802 2.61824   1
  -2  -9  -1 15.7660 2.23854   2
   2  -9  -1 19.6765 2.67895   1
  -2  -9   1 17.7271 2.48373   1
  -3  -9  -1 104.195 4.80194   2
  -3  -9  -1 96.7502 4.86105   1
   3  -9   1 100.099 5.02973   1
  -3  -9   1 104.998 5.11698   1
   3  -9  -1 99.7631 5.06722   1
  -4  -9  -1 17.5698 2.59156   1
   4  -9   1 18.8645 2.67244   1
  -4  -9  -1 13.6500 2.32681   2
  -4  -9   1 23.6626 2.98542   1
  -4   9  -1 18.9052 2.61222   3
   4  -9  -1 19.8413 2.75008   1
  -5   9   1 13.0209 2.35480   3
   5  -9   1 15.9996 2.60220   1
  -5  -9  -1 9.76741 2.08989   1
  -5   9  -1 16.1171 2.42095   3
   5  -9  -1 16.1930 2.62768   1
  -5  -9   1 18.5346 2.67878   1
  -6   9   1 33.1592 3.51787   3
  -6  -9  -1 32.3021 3.77774   2
  -6  -9  -1 25.6975 3.23428   1
   6  -9   1 26.0970 3.34637   1
   6  -9  -1 29.4278 3.61550   1
  -6   9  -1 25.2356 3.10185   3
  -6  -9   1 31.0948 3.49130   1
   7  -9   1 9.77826 2.28823   1
  -7  -9  -1 10.6200 2.31586   1
  -7   9   1 8.90112 2.24446   3
  -7  -9  -1 12.3056 2.64305   2
   7  -9  -1 11.6780 2.62172   1
  -7  -9   1 9.68158 2.30440   1
  -7   9  -1 11.3694 2.46121   3
  -8   9   1 1.88721 1.78594   3
  -8  -9  -1 1.87535 1.58231   1
   8  -9   1 2.34218 1.67839   1
  -8  -9  -1 5.18475 2.12767   2
   8  -9  -1 1.63862 1.88157   1
  -8  -9   1 3.57112 1.72982   1
  -8   9  -1 1.59569 1.70149   3
   9  -9   1 11.9202 2.81967   1
  -9   9   1 3.03784 1.99581   3
  -9  -9  -1 2.21126 1.78658   2
   9  -9  -1 3.40642 1.91986   1
  -9  -9   1 3.18597 2.05721   1
  -9   9  -1 0.55913 1.57020   3
  10  -9  -1 6.81230 2.78015   1
 -10   9  -1 7.79719 2.45650   3
   0 -10  -1 20.7681 2.83777   1
   0 -10   1 21.8121 2.92245   1
  -1 -10  -1 37.0755 3.60147   1
   1 -10   1 38.8506 3.70168   1
   1 -10  -1 40.0850 3.76556   1
  -1 -10   1 33.6916 3.46287   1
  -2 -10  -1 87.2450 4.81819   1
   2 -10   1 87.4166 4.92320   1
   2 -10  -1 85.9571 4.84469   1
  -2 -10   1 77.5441 4.60820   1
  -3 -10  -1 7.41885 1.87681   2
  -3 -10  -1 9.22883 2.09331   1
   3 -10   1 7.20035 2.07460   1
   3 -10  -1 7.60706 2.05928   1
  -3 -10   1 6.32964 1.86079   1
  -4 -10  -1 61.6865 4.16996   1
   4 -10   1 67.7146 4.42344   1
  -4 -10  -1 62.3296 4.22330   2
   4 -10  -1 54.9438 4.09318   1
  -4 -10   1 59.2585 4.17003   1
   5 -10   1 24.1674 3.27489   1
  -5 -10  -1 20.5480 2.95705   1
  -5 -10  -1 19.2136 2.99878   2
   5 -10  -1 21.3344 3.14944   1
  -5 -10   1 19.7328 2.95666   1
  -6 -10  -1 19.6846 3.16661   2
  -6 -10  -1 13.5924 2.58634   1
   6 -10   1 15.7197 2.82800   1
  -6 -10   1 10.7581 2.49410   1
  -6  10  -1 13.0121 2.56391   3
   6 -10  -1 12.8106 2.73926   1
  -7  10   1 -1.9514 1.36788   3
  -7 -10  -1 -1.3381 1.32792   1
   7 -10   1 1.28725 1.56345   1
  -7 -10  -1 0.19752 1.67488   2
   7 -10  -1 2.10709 1.67654   1
  -7 -10   1 -1.0842 1.47774   1
  -7  10  -1 2.98614 1.72137   3
   8 -10   1 5.87989 2.12589   1
  -8 -10  -1 8.95489 2.65649   2
  -8 -10  -1 8.66041 2.44305   1
  -8  10   1 6.16305 2.24065   3
  -8 -10   1 5.02604 2.18357   1
  -8  10  -1 11.9158 2.68693   3
   8 -10  -1 5.01801 2.14138   1
  -9  10   1 0.53128 1.95205   3
   9 -10   1 0.74168 1.79854   1
  -9 -10  -1 0.22882 1.75876   2
  -9  10  -1 1.70986 1.80585   3
   9 -10  -1 0.25461 1.78456   1
  -9 -10   1 -2.0433 1.67408   2
  -9 -10   1 -1.2947 1.60097   1
   0 -11   1 67.7266 4.47493   1
   0 -11  -1 70.4641 4.54515   1
  -1 -11  -1 14.7525 2.54353   1
   1 -11   1 11.7578 2.30508   1
  -1 -11   1 11.7465 2.33776   1
   1 -11  -1 15.4788 2.58446   1
  -2 -11  -1 4.75563 1.74175   1
   2 -11   1 1.46676 1.34563   1
   2 -11  -1 1.48186 1.61463   1
  -2 -11   1 1.38428 1.47946   1
  -3 -11  -1 25.8517 3.30267   1
   3 -11   1 27.4237 3.43522   1
  -3 -11   1 26.3354 3.36312   1
   3 -11  -1 22.9380 3.18423   1
  -4 -11  -1 20.4820 2.99520   2
  -4 -11  -1 14.5602 2.72558   1
   4 -11   1 17.8017 2.92662   1
   4 -11  -1 13.8634 2.64137   1
  -4 -11   1 10.7767 2.49524   1
  -5 -11  -1 8.94852 2.27354   1
   5 -11   1 7.49331 2.19042   1
  -5 -11  -1 6.88621 2.26180   2
   5 -11  -1 9.15519 2.37171   1
  -5 -11   1 5.86570 1.98456   1
  -6 -11  -1 8.07271 2.26986   1
  -6 -11  -1 11.2939 2.76044   2
   6 -11   1 13.5111 2.79237   1
   6 -11  -1 12.3870 2.74175   1
  -6 -11   1 11.4311 2.59904   1
  -6 -11   1 8.26929 2.29620   2
  -7 -11  -1 2.73491 1.90671   1
  -7 -11  -1 2.40328 2.03394   2
   7 -11   1 6.19229 2.26522   1
   7 -11  -1 3.70535 2.04337   1
  -7  11  -1 6.57255 2.39231   3
  -7 -11   1 5.94854 2.18549   1
  -7 -11   1 7.63065 2.50701   2
   8 -11   1 9.85390 2.57484   1
  -8 -11  -1 4.00040 2.39902   2
  -8 -11  -1 8.12444 2.52576   1
   8 -11  -1 4.31203 2.06315   1
  -8 -11   1 8.87527 2.76095   1
  -8 -11   1 5.05528 2.34881   2
  -8  11  -1 2.06294 2.00468   3
   9 -11   1 14.5314 3.45795   1
  -9  11   1 7.74202 2.49844   3
  -9 -11   1 11.6332 2.85755   1
   0 -12   1 14.6777 2.66946   1
   0 -12  -1 22.6744 3.30406   1
   1 -12   1 4.83201 1.98157   1
  -1 -12  -1 2.77875 1.73119   1
  -1 -12   1 5.87586 2.03479   1
   1 -12  -1 2.90807 1.71772   1
  -2 -12  -1 10.3334 2.41444   1
   2 -12   1 8.63383 2.32095   1
   2 -12  -1 10.3894 2.50684   1
  -2 -12   1 9.49187 2.34151   1
  -3 -12  -1 2.06964 1.73247   1
   3 -12   1 3.92938 1.84958   1
   3 -12  -1 2.45848 1.67951   1
  -3 -12   1 5.44046 2.00412   1
  -4 -12  -1 6.05666 2.09421   1
   4 -12   1 1.22301 1.66667   1
   4 -12  -1 3.63336 1.84450   1
  -4 -12   1 4.19879 1.94915   1
   5 -12   1 10.6198 2.68041   1
  -5 -12  -1 6.63135 2.30403   1
   5 -12  -1 7.72545 2.35852   1
  -5 -12   1 8.43863 2.40014   1
   6 -12   1 21.7579 3.61591   1
  -6 -12  -1 33.5603 4.27108   2
  -6 -12  -1 33.0978 4.05618   1
  -6 -12   1 28.0721 3.86046   1
   6 -12  -1 31.2114 4.20559   1
  -6 -12   1 23.6378 3.64723   2
  -7 -12  -1 2.14002 2.06300   1
  -7 -12  -1 2.46966 1.91323   2
   7 -12   1 2.74867 2.09467   1
  -7 -12   1 3.65291 2.23363   2
  -7 -12   1 3.42433 1.88824   1
   7 -12  -1 2.01513 2.05971   1
   0 -13   1 2.27375 1.70832   1
   0 -13  -1 7.19822 2.30016   1
  -1 -13  -1 -0.3013 1.51715   1
   1 -13   1 1.94563 1.73498   1
  -1 -13   1 4.11106 2.00232   1
   1 -13  -1 3.71943 1.89581   1
   2 -13   1 18.4472 3.12702   1
  -2 -13  -1 15.9345 2.99639   1
   2 -13  -1 15.7338 2.99281   1
  -2 -13   1 13.8016 2.88254   1
  -3 -13  -1 13.3561 2.84684   1
   3 -13   1 12.1459 2.79468   1
  -3 -13   1 13.4658 2.91463   1
   3 -13  -1 14.4191 2.93849   1
   4 -13   1 15.5402 3.07007   1
  -4 -13  -1 12.3156 2.73592   1
  -4 -13   1 20.2407 3.37364   1
   4 -13  -1 15.9808 3.13719   1
  -5 -13  -1 0.84034 1.60853   1
   5 -13   1 -1.1029 1.54065   1
  -5 -13   1 1.44721 1.87082   1
   5 -13  -1 2.02133 1.82260   1
  -6 -13  -1 -0.0504 1.62317   1
   0 -14   1 31.7966 4.17781   1
   0 -14  -1 23.6086 3.69815   1
  -1 -14  -1 1.44308 1.79559   1
   1 -14   1 0.59509 1.93904   1
   1 -14  -1 -0.7133 1.42147   1
  -1 -14   1 -1.7234 1.52996   1
   2 -14   1 4.06170 2.05624   1
  -2 -14  -1 7.07032 2.26864   1
  -2 -14   1 4.94640 2.18481   1
   0   0  -2 -0.5603 0.07629   2
   1   0  -2 -1.7039 0.24376   2
   1   0  -2 -2.3075 0.26817   1
  -1   0  -2 -1.2081 0.27682   2
   2   0   2 49.1931 1.50249   1
   2   0  -2 51.9651 2.00510   1
  -2   0  -2 47.0888 1.67908   2
   3   0   2 988.072 17.4218   1
  -3   0  -2 966.317 17.0057   2
   3   0  -2 978.212 18.1715   1
   4   0  -2 1224.84 22.7926   1
   4   0   2 1217.46 21.9699   1
   5   0  -2 30.4950 2.23152   1
   5   0   2 30.4408 1.92120   1
   6   0   2 148.162 4.85202   1
   6   0  -2 152.831 5.38084   1
  -7   0  -2 1.71506 1.06487   2
   7   0  -2 4.27479 1.41806   1
   7   0   2 1.47038 1.00052   1
   8   0  -2 18.1107 2.56087   1
   8   0   2 21.2237 2.44463   1
  -8   0  -2 13.6259 2.15421   2
   9   0  -2 72.2016 4.34882   1
  -9   0  -2 76.4410 4.23775   2
 -10   0  -2 7.94777 1.95066   2
  10   0  -2 3.88764 1.69274   1
 -12   0  -2 0.91935 1.83870   3
   0  -1  -2 -9.5032 0.41201   2
   0  -1  -2 -9.6994 0.46457   1
   0   1  -2 -9.5165 0.43488   2
   0   1  -2 -9.1087 0.43847   3
   0  -1   2 -9.9424 0.45725   1
  -1   1   2 376.659 6.56847   3
  -1  -1  -2 380.929 6.94327   2
   1  -1   2 375.136 6.83995   1
  -1  -1  -2 387.654 6.78434   1
  -1   1  -2 388.390 6.47517   2
  -1   1  -2 382.923 7.07715   3
   1  -1  -2 352.933 7.20804   1
   1  -1  -2 375.196 6.46165   2
  -1  -1   2 391.254 7.34613   1
  -2   1   2 2.19011 0.52124   3
  -2  -1  -2 2.32492 0.65241   2
  -2  -1  -2 2.49734 0.50745   1
   2  -1   2 1.93175 0.56249   1
  -2  -1   2 2.91586 0.77511   1
   2  -1  -2 2.74590 0.79034   1
  -2   1  -2 2.86800 0.79021   3
  -2   1  -2 2.93560 0.51966   2
  -3  -1  -2 385.061 7.63648   1
   3   1  -2 375.733 8.20799   1
  -3   1   2 382.096 7.53443   3
   3  -1   2 385.693 7.74151   1
   3  -1  -2 376.189 8.29324   1
  -3   1  -2 384.034 7.30865   2
   4  -1   2 17.2857 1.40509   1
   4   1  -2 19.2015 1.79276   1
  -4  -1  -2 13.2510 1.33772   1
  -4   1  -2 14.9914 1.34690   2
   4  -1  -2 16.9675 1.77942   1
  -5  -1  -2 102.618 3.62449   1
   5  -1   2 102.675 3.68382   1
   5   1  -2 103.071 3.96474   1
   5  -1  -2 107.121 4.13716   1
  -5   1  -2 103.577 3.48807   2
   6  -1   2 20.2603 2.04680   1
  -6  -1  -2 22.4266 2.09249   1
   6   1  -2 18.7613 2.14058   1
  -6   1  -2 21.8827 1.98259   2
   6  -1  -2 18.2134 2.10012   1
  -7  -1  -2 90.1161 3.97271   1
   7  -1   2 87.4164 3.94886   1
   7   1  -2 89.9144 4.27967   1
   7  -1  -2 97.8948 4.56314   1
  -7   1  -2 88.6093 3.84864   2
  -8   1   2 89.6002 4.31160   3
  -8  -1  -2 84.3062 4.38265   2
  -8  -1  -2 90.9821 4.33105   1
   8  -1   2 97.8804 4.41598   1
  -8   1  -2 86.5607 4.16910   2
   8  -1  -2 95.3195 4.82320   1
  -9  -1  -2 9.19878 1.89652   1
  -9   1   2 6.84999 1.77242   3
  -9  -1  -2 12.4430 2.23788   2
   9  -1  -2 11.9775 2.35903   1
  -9  -1   2 13.2343 2.39956   1
  -9   1  -2 10.5736 1.90853   2
 -10   1   2 8.39876 1.98508   3
 -10  -1  -2 6.03237 1.87724   2
 -10  -1   2 5.24003 1.87524   1
  10  -1  -2 8.62420 2.15011   1
 -10   1  -2 2.37483 1.56030   3
 -11  -1  -2 1.10732 1.53034   2
 -11   1  -2 4.23871 1.93816   3
 -12   1  -2 6.09371 2.29812   3
   0  -2  -2 44.1774 1.42084   2
   0   2  -2 45.3901 1.57221   3
   0  -2  -2 41.0227 1.59902   1
  -1   2   2 113.036 2.71644   3
   1  -2   2 117.910 2.91503   1
  -1  -2  -2 112.623 2.94049   2
  -1  -2  -2 112.902 2.85130   1
   1  -2  -2 105.918 3.06331   1
  -1  -2   2 110.942 3.07539   1
  -1   2  -2 112.544 2.25333   2
   1  -2  -2 109.151 2.30129   2
  -2  -2  -2 206.767 4.48886   1
   2  -2   2 198.679 4.56742   1
  -2   2   2 206.450 4.41950   3
   2  -2  -2 198.003 3.75090   2
   2  -2  -2 191.462 4.91034   1
  -2  -2   2 206.741 4.96689   1
  -2   2  -2 199.015 3.72067   2
  -2   2  -2 201.377 4.82525   3
   3  -2   2 95.2681 3.01456   1
  -3  -2  -2 97.1953 2.90957   1
  -3   2   2 98.6064 2.94987   3
  -3  -2   2 103.372 3.44803   1
  -3   2  -2 97.6940 2.42973   2
  -3   2  -2 95.0111 3.27246   3
   3  -2  -2 103.843 3.49928   1
  -4  -2  -2 186.091 4.84173   1
  -4   2   2 178.720 4.81904   3
   4  -2   2 184.617 5.05740   1
   4  -2  -2 185.466 5.48518   1
  -4  -2   2 196.974 5.50421   1
  -4   2  -2 186.782 5.29629   3
  -4   2  -2 190.460 4.30500   2
   5  -2   2 254.080 6.59049   1
  -5  -2  -2 250.174 6.36049   1
  -5   2   2 259.527 6.43297   3
  -5  -2   2 238.326 6.83998   1
   5  -2  -2 250.155 7.05579   1
  -5   2  -2 244.078 6.76489   3
  -5   2  -2 241.015 5.67163   2
  -6   2   2 26.5322 2.31353   3
  -6  -2  -2 23.5859 2.16124   1
   6  -2   2 26.7338 2.16948   1
   6  -2  -2 26.5056 2.63672   1
  -6  -2   2 27.2658 2.64118   1
  -6   2  -2 25.5299 2.48727   3
  -6   2  -2 25.0412 1.83272   2
  -7   2   2 0.23509 0.85892   3
   7  -2   2 1.57869 1.01967   1
  -7  -2  -2 -0.0193 0.85837   1
  -7   2  -2 0.38713 0.78885   2
  -7   2  -2 0.97523 1.10207   3
  -7  -2   2 1.07583 1.06565   1
   7  -2  -2 1.62748 1.17947   1
  -8  -2  -2 236.941 7.37625   1
   8  -2   2 228.017 7.45160   1
  -8   2   2 236.773 7.35524   3
  -8   2  -2 240.691 7.89057   3
  -8   2  -2 227.696 6.65795   2
   8  -2  -2 244.853 8.17693   1
  -8  -2   2 245.774 8.03221   1
  -9  -2  -2 21.3821 2.61788   1
  -9  -2  -2 15.3163 2.52720   2
  -9   2   2 21.2293 2.65696   3
  -9  -2   2 18.3269 2.69705   1
  -9   2  -2 19.1517 2.79266   3
   9  -2  -2 17.2475 2.72062   1
 -10   2   2 26.5222 3.07879   3
 -10  -2  -2 27.2765 3.33424   2
  10  -2  -2 25.3625 3.42651   1
 -10  -2   2 23.9015 3.21472   1
 -10   2  -2 23.3661 3.11497   3
 -11  -2  -2 3.99416 2.02332   2
 -11   2  -2 4.31381 1.99089   3
 -12  -2  -2 14.9169 3.02572   2
 -12   2  -2 9.22545 2.60178   3
   0  -3   2 493.706 9.77007   1
   0  -3  -2 499.472 8.86763   2
   0  -3  -2 485.563 9.71573   1
  -1  -3  -2 518.118 10.2008   1
  -1  -3  -2 525.581 9.87672   2
   1  -3   2 516.239 10.2518   1
   1  -3  -2 540.297 8.91876   2
  -1  -3   2 527.868 10.4337   1
  -1   3  -2 525.077 10.0560   3
   1  -3  -2 520.296 10.4422   1
  -2  -3  -2 99.5352 3.02191   1
   2  -3   2 100.627 3.14757   1
  -2   3   2 97.8434 2.93204   3
  -2   3  -2 98.7991 1.94849   2
   2  -3  -2 102.849 3.34587   1
  -2   3  -2 103.223 3.25187   3
   2  -3  -2 98.5257 2.01029   2
  -2  -3   2 99.1687 3.28071   1
  -3   3   2 232.159 5.53399   3
   3  -3   2 229.310 5.77239   1
  -3  -3  -2 234.701 5.63031   1
  -3   3  -2 239.874 4.31894   2
  -3   3  -2 242.174 6.01954   3
   3  -3  -2 243.520 6.24444   1
  -3  -3   2 234.742 6.04627   1
  -4  -3  -2 154.662 4.42547   1
  -4   3   2 149.862 4.40786   3
   4  -3   2 164.255 4.73875   1
   4  -3  -2 145.166 5.01258   1
  -4   3  -2 145.224 4.70114   3
  -4   3  -2 150.303 3.35405   2
  -4  -3   2 149.655 4.80543   1
   5  -3   2 49.7344 2.71507   1
  -5  -3  -2 49.9569 2.51088   1
  -5   3   2 50.0847 2.60864   3
  -5   3  -2 51.4372 2.93060   3
  -5  -3   2 51.6253 2.90578   1
  -5   3  -2 47.8522 1.92188   2
   5  -3  -2 45.7617 2.87782   1
   6  -3   2 40.2514 2.68165   1
  -6   3   2 42.8510 2.63808   3
  -6  -3  -2 41.0904 2.49156   1
  -6   3  -2 37.7860 1.97550   2
   6  -3  -2 51.4352 3.11909   1
  -6  -3   2 39.8138 2.76246   1
  -6   3  -2 43.3533 2.91545   3
   7  -3   2 56.6274 3.37468   1
  -7  -3  -2 64.0751 3.29835   1
  -7   3   2 58.8163 3.34740   3
  -7  -3   2 63.6723 3.72537   1
  -7   3  -2 54.9725 3.42829   3
   7  -3  -2 58.1057 3.65129   1
  -8  -3  -2 51.7279 3.24054   1
  -8   3   2 49.0196 3.28201   3
   8  -3   2 55.3832 3.58616   1
  -8  -3   2 53.6692 3.67259   1
  -8   3  -2 54.9263 3.73850   3
   8  -3  -2 46.4292 3.57148   1
  -9   3   2 8.65163 1.92773   3
  -9  -3  -2 8.68587 2.03398   2
  -9   3  -2 7.88696 2.01776   3
  -9  -3   2 4.22750 1.66018   1
   9  -3  -2 7.66481 1.99015   1
 -10  -3  -2 7.46691 2.10521   2
 -10   3   2 6.02431 1.79429   3
 -10  -3   2 8.25794 2.11215   1
 -10   3  -2 6.46247 1.97108   3
  10  -3  -2 8.08727 2.30038   1
 -11  -3  -2 0.41871 1.53629   2
 -11   3  -2 4.38251 1.97543   3
 -12  -3  -2 61.6317 5.62872   2
 -12   3  -2 53.2295 5.02995   3
 -13  -3  -2 21.6551 3.71070   2
 -13  -3   2 24.1009 3.88668   2
   0  -4  -2 64.1871 2.59809   1
   0  -4  -2 67.9967 2.19640   2
   1  -4   2 369.742 8.17358   1
  -1  -4  -2 364.024 7.65742   2
  -1  -4  -2 367.278 8.09919   1
   1  -4  -2 361.288 8.24196   1
  -1   4  -2 371.238 7.91533   3
   1  -4  -2 377.217 6.69700   2
  -1  -4   2 374.879 8.30119   1
   2  -4   2 15.2430 1.53955   1
  -2  -4  -2 13.3404 1.39434   1
  -2   4   2 12.6917 1.29256   3
  -2   4  -2 16.1690 1.61110   3
   2  -4  -2 13.9938 0.65565   2
   2  -4  -2 14.1485 1.57214   1
  -2  -4   2 13.0139 1.46636   1
   3  -4   2 42.4864 2.33934   1
  -3  -4  -2 42.9596 2.24916   1
  -3   4   2 42.9709 2.24606   3
  -3   4  -2 41.5007 2.34021   3
   3  -4  -2 35.9153 2.29709   1
  -3  -4   2 40.1748 2.34331   1
   4  -4   2 54.5316 2.77692   1
  -4   4   2 62.6985 2.74045   3
  -4  -4  -2 59.9589 2.73219   1
  -4  -4   2 55.1998 2.92461   1
  -4   4  -2 55.3288 2.94356   3
  -4   4  -2 52.4370 1.39400   2
   4  -4  -2 54.4698 2.98497   1
   5  -4   2 45.1720 2.65078   1
  -5   4   2 48.7209 2.67687   3
  -5  -4  -2 45.5154 2.52996   1
   5  -4  -2 41.2256 2.86153   1
  -5  -4   2 44.4486 2.73614   1
  -5   4  -2 43.9437 2.72967   3
  -5   4  -2 43.2288 1.53801   2
   6  -4   2 56.7618 3.28461   1
  -6  -4  -2 53.5175 2.94551   1
  -6   4   2 47.8213 2.91466   3
   6  -4  -2 59.1784 3.53604   1
  -6   4  -2 50.6927 3.25721   3
  -6  -4   2 58.1766 3.37280   1
   7  -4   2 10.3045 1.89652   1
  -7  -4  -2 10.3836 1.69847   1
  -7   4   2 9.91607 1.81351   3
  -7  -4   2 13.5559 2.13093   1
   7  -4  -2 10.5142 2.03512   1
  -7   4  -2 10.6990 2.01576   3
  -8  -4  -2 18.4065 2.35852   1
  -8   4   2 17.1124 2.32723   3
   8  -4   2 23.4859 2.82423   1
  -8   4  -2 16.7589 2.48850   3
  -8  -4   2 20.3815 2.70355   1
   8  -4  -2 25.9112 3.19171   1
  -9  -4  -2 12.9807 2.54975   2
  -9   4   2 19.6019 2.64584   3
  -9  -4   2 16.5414 2.68380   1
  -9   4  -2 21.8869 2.99132   3
   9  -4  -2 20.8123 3.10428   1
 -10  -4  -2 54.2170 4.93580   2
  10  -4  -2 43.8293 4.51811   1
 -10  -4   2 47.8396 4.39274   1
 -10   4  -2 43.0642 4.21399   3
 -11  -4  -2 20.3353 3.53543   2
 -11   4  -2 27.4567 3.62002   3
 -12  -4  -2 11.2453 2.78259   2
 -12   4  -2 18.6321 3.28515   3
   0  -5   2 208.954 5.74364   1
   0  -5  -2 189.949 5.52462   1
   0  -5  -2 204.666 4.74077   2
   1  -5   2 158.184 4.82359   1
  -1  -5  -2 154.323 4.74080   1
  -1  -5  -2 157.107 4.41524   2
   1  -5  -2 153.923 4.85351   1
   1  -5  -2 164.873 3.59961   2
  -1  -5   2 158.122 4.90207   1
  -1   5  -2 154.468 4.58748   3
   2  -5   2 137.318 4.44997   1
  -2  -5  -2 142.171 4.49341   1
  -2   5  -2 135.898 4.41443   3
   2  -5  -2 128.946 2.70321   2
  -2  -5   2 133.066 4.54424   1
   2  -5  -2 136.275 4.65196   1
   3  -5   2 142.561 4.72905   1
  -3  -5  -2 143.216 4.60985   1
  -3   5   2 136.207 4.37733   3
  -3  -5   2 142.595 4.79976   1
   3  -5  -2 132.361 4.79857   1
  -3   5  -2 147.575 4.72433   3
  -4   5   2 45.3768 2.59549   3
   4  -5   2 47.7320 2.72335   1
  -4  -5  -2 45.2606 2.58939   1
   4  -5  -2 41.6400 2.82762   1
  -4   5  -2 43.6942 2.65702   3
  -4  -5   2 47.6639 2.78558   1
  -5  -5  -2 46.1072 2.76727   1
   5  -5   2 50.6287 3.06053   1
  -5   5   2 54.1024 2.95370   3
  -5   5  -2 51.8325 3.06091   3
  -5  -5   2 52.7330 3.09250   1
   5  -5  -2 52.9347 3.24443   1
   6  -5   2 3.22251 1.34321   1
  -6   5   2 4.62471 1.27797   3
  -6  -5  -2 6.64901 1.40095   1
  -6   5  -2 6.90774 1.55438   3
   6  -5  -2 6.58807 1.67773   1
  -6  -5   2 5.72439 1.45557   1
   7  -5   2 54.6769 3.64100   1
  -7  -5  -2 53.8383 3.30585   1
  -7   5   2 59.2397 3.51207   3
  -7  -5   2 58.8640 3.72767   1
  -7   5  -2 50.0463 3.43905   3
   7  -5  -2 53.3375 3.74132   1
  -8  -5  -2 1.62584 1.19351   1
  -8   5   2 1.32217 1.29338   3
   8  -5   2 2.63148 1.44507   1
  -8  -5   2 0.16748 1.22752   1
  -8   5  -2 3.74336 1.71133   3
   8  -5  -2 0.27306 1.18396   1
  -9  -5  -2 29.4095 3.65331   2
  -9   5   2 25.8353 3.07756   3
   9  -5  -2 30.2603 3.75622   1
  -9  -5   2 33.1682 3.62126   1
  -9   5  -2 23.9249 3.12983   3
 -10  -5  -2 29.5788 3.80686   2
  10  -5  -2 28.8346 3.82464   1
 -10   5  -2 34.9847 3.93268   3
 -10  -5   2 30.5382 3.67482   1
 -11  -5  -2 59.4852 5.60476   2
 -11   5  -2 54.3553 4.98724   3
 -12  -5  -2 8.95872 2.58218   2
   0  -6   2 58.1126 2.95121   1
   0  -6  -2 53.8417 2.28177   2
   0  -6  -2 56.4121 2.94598   1
   1  -6   2 53.7099 2.88927   1
  -1  -6  -2 59.7722 3.02534   1
  -1  -6  -2 56.4475 2.60295   2
   1  -6  -2 55.3400 1.99570   2
  -1  -6   2 54.1421 2.99067   1
   1  -6  -2 53.5421 2.95530   1
   2  -6   2 94.5358 3.89450   1
  -2  -6  -2 101.381 3.98340   1
  -2  -6  -2 92.6623 3.72129   2
  -2   6  -2 95.4743 3.83915   3
  -2  -6   2 98.2176 4.07772   1
   2  -6  -2 97.7838 2.27727   2
   2  -6  -2 96.4174 4.10113   1
  -3   6   2 171.016 5.27083   3
  -3  -6  -2 168.646 5.48496   1
   3  -6   2 176.518 5.70161   1
  -3  -6   2 166.658 5.67687   1
  -3   6  -2 172.987 5.56305   3
   3  -6  -2 167.180 5.75447   1
  -4   6   2 9.51271 1.58938   3
  -4  -6  -2 10.4448 1.64643   1
   4  -6   2 6.34668 1.44860   1
   4  -6  -2 9.34914 1.77292   1
  -4   6  -2 8.48089 1.57629   3
  -4  -6   2 10.6328 1.72822   1
   5  -6   2 125.066 5.06326   1
  -5  -6  -2 127.995 4.88361   1
  -5   6   2 116.786 4.67217   3
   5  -6  -2 118.032 5.19662   1
  -5  -6   2 119.480 5.01093   1
  -5   6  -2 128.657 5.01615   3
  -6   6   2 17.9403 2.25218   3
  -6  -6  -2 17.9257 2.28481   1
   6  -6   2 21.1369 2.57644   1
   6  -6  -2 23.9018 2.81702   1
  -6  -6   2 16.4341 2.28275   1
  -6   6  -2 19.7450 2.46633   3
  -7  -6  -2 115.259 4.96807   1
  -7   6   2 109.794 4.92010   3
  -7   6  -2 117.596 5.33637   3
  -7  -6   2 112.086 5.16412   1
   7  -6  -2 104.625 5.45777   1
  -8   6   2 -1.3927 1.12916   3
   8  -6   2 0.91399 1.35849   1
  -8  -6  -2 0.53573 1.50175   2
  -8  -6  -2 -0.8243 1.05546   1
   8  -6  -2 0.20503 1.36832   1
  -8   6  -2 -0.6677 1.22810   3
  -8  -6   2 2.36374 1.44218   1
  -9   6   2 2.16027 1.46933   3
  -9  -6  -2 1.79464 1.66391   2
  -9  -6   2 0.19969 1.35063   1
  -9   6  -2 -0.5784 1.20646   3
   9  -6  -2 1.17094 1.58321   1
 -10  -6  -2 15.8741 3.07888   2
  10  -6  -2 20.2370 3.42620   1
 -10   6  -2 18.9803 3.09730   3
 -10  -6   2 21.2444 3.19121   1
 -11  -6  -2 3.42496 2.19235   2
 -11   6  -2 6.14971 2.26713   3
   0  -7   2 204.424 6.49669   1
   0  -7  -2 197.627 6.39220   1
   0  -7  -2 211.627 5.29824   2
   1  -7   2 114.943 4.57723   1
  -1  -7  -2 111.389 4.52833   1
  -1  -7  -2 111.898 4.00280   2
   1  -7  -2 110.658 3.20022   2
   1  -7  -2 109.571 4.51732   1
  -1  -7   2 116.648 4.67466   1
  -2  -7  -2 61.2751 3.36358   1
  -2  -7  -2 59.1253 3.14001   2
   2  -7   2 60.8607 3.36409   1
  -2   7  -2 64.6065 3.31799   3
   2  -7  -2 60.2060 3.46609   1
  -2  -7   2 62.4542 3.49141   1
  -3  -7  -2 52.3689 3.09717   1
   3  -7   2 43.9691 2.92627   1
  -3  -7  -2 48.0346 2.98023   2
   3  -7  -2 49.2109 3.14744   1
  -3  -7   2 47.3438 3.08050   1
  -3   7  -2 47.6199 2.94040   3
  -4   7   2 9.75142 1.63412   3
   4  -7   2 8.32084 1.74887   1
  -4  -7  -2 9.62953 1.76149   1
   4  -7  -2 7.64863 1.70184   1
  -4  -7   2 8.58210 1.70247   1
  -4   7  -2 11.4036 1.95892   3
  -5   7   2 11.6858 1.94457   3
  -5  -7  -2 10.0314 1.81323   1
   5  -7   2 9.63741 1.86041   1
  -5  -7   2 11.0036 1.94756   1
  -5   7  -2 15.6675 2.27742   3
   5  -7  -2 6.28755 1.85898   1
  -6  -7  -2 5.09667 1.58990   1
   6  -7   2 6.89908 1.73992   1
  -6   7   2 5.81074 1.59245   3
  -6  -7   2 6.31800 1.69012   1
  -6   7  -2 6.28728 1.77370   3
   6  -7  -2 8.41771 1.98109   1
  -7  -7  -2 14.9027 2.59992   2
  -7  -7  -2 14.4807 2.32088   1
   7  -7   2 15.2368 2.53861   1
  -7   7   2 11.1832 2.12749   3
   7  -7  -2 11.9412 2.58447   1
  -7   7  -2 12.8535 2.29974   3
  -7  -7   2 13.4054 2.31878   1
  -8  -7  -2 17.1749 2.54849   1
  -8   7   2 15.1473 2.48179   3
  -8  -7  -2 19.5615 3.17908   2
   8  -7   2 13.7944 2.63357   1
  -8   7  -2 12.3503 2.42693   3
   8  -7  -2 19.8070 3.18498   1
  -8  -7   2 16.9841 2.73175   1
  -9  -7  -2 27.2036 3.67170   2
  -9   7   2 31.4307 3.49561   3
  -9   7  -2 29.0107 3.54519   3
   9  -7  -2 41.6534 4.57561   1
  -9  -7   2 37.4221 3.97387   1
 -10  -7  -2 -0.3522 1.59867   2
  10  -7  -2 1.85576 1.72730   1
 -10  -7   2 1.37975 1.68147   1
 -10   7  -2 0.16589 1.58882   3
 -11  -7  -2 10.1051 2.75844   2
 -11   7  -2 13.7325 2.98934   3
   0  -8  -2 3.61440 0.95738   2
   0  -8   2 2.62884 1.15453   1
   0  -8  -2 6.67052 1.57307   1
   1  -8   2 27.0726 2.77673   1
  -1  -8  -2 21.5093 2.44839   1
  -1  -8  -2 27.6384 2.38792   2
  -1  -8   2 27.1533 2.77272   1
   1  -8  -2 28.4364 2.82832   1
  -2  -8  -2 -0.1315 0.86846   2
   2  -8   2 0.04708 0.85736   1
  -2  -8  -2 1.82671 1.12150   1
  -2  -8   2 0.65987 1.09336   1
   2  -8  -2 0.46774 0.93023   1
  -3  -8  -2 104.841 4.71973   1
   3  -8   2 102.771 4.80613   1
  -3  -8  -2 102.216 4.63284   2
   3  -8  -2 98.1732 4.78230   1
  -3  -8   2 98.5786 4.71940   1
  -3   8  -2 103.217 4.62322   3
   4  -8   2 165.511 6.31900   1
  -4  -8  -2 151.669 5.97589   1
  -4  -8  -2 161.285 6.14587   2
  -4  -8   2 158.113 6.20567   1
   4  -8  -2 158.229 6.41121   1
  -4   8  -2 160.601 6.06218   3
   5  -8   2 42.6548 3.28780   1
  -5  -8  -2 42.0198 3.88711   2
  -5   8   2 40.2503 3.44837   3
  -5  -8  -2 39.4648 3.09544   1
   5  -8  -2 38.7751 3.86776   1
  -5   8  -2 35.8691 3.37307   3
  -5  -8   2 32.8273 3.32393   1
  -6  -8  -2 25.3669 2.93660   1
  -6   8   2 20.3551 2.65251   3
   6  -8   2 27.5788 3.21069   1
  -6  -8  -2 23.9163 3.15670   2
  -6  -8   2 26.4339 3.15556   1
   6  -8  -2 22.1721 3.04824   1
  -6   8  -2 20.0390 2.76321   3
   7  -8   2 5.42481 1.85062   1
  -7   8   2 5.23121 1.81034   3
  -7  -8  -2 4.79383 1.87915   2
  -7  -8  -2 6.74525 1.85066   1
   7  -8  -2 3.23908 1.65643   1
  -7  -8   2 4.97668 1.84061   1
  -7   8  -2 3.61745 1.71075   3
   8  -8   2 7.16069 2.16615   1
  -8  -8  -2 10.2772 2.29571   1
  -8  -8  -2 8.20976 2.34028   2
  -8   8   2 12.3949 2.45104   3
   8  -8  -2 9.04802 2.47573   1
  -8   8  -2 9.35855 2.28576   3
  -8  -8   2 10.2759 2.39721   1
  -9   8   2 12.3767 2.62181   3
  -9  -8  -2 11.2406 2.70681   2
   9  -8  -2 8.98514 2.66133   1
  -9  -8   2 18.7964 3.10099   1
  -9   8  -2 9.04343 2.38226   3
 -10  -8  -2 3.26318 1.95586   2
 -10  -8   2 4.56119 2.14041   1
 -10   8  -2 7.29964 2.27228   3
  10  -8  -2 3.60364 2.19834   1
 -11   8  -2 8.53628 2.60356   3
   0  -9  -2 34.2126 3.30452   1
   0  -9   2 39.6734 3.10655   1
  -1  -9  -2 70.5415 4.02974   1
   1  -9   2 69.5847 4.10472   1
  -1  -9   2 73.6753 4.17272   1
   1  -9  -2 69.5683 4.06634   1
  -2  -9  -2 33.5398 3.32428   1
   2  -9   2 30.1180 3.21278   1
  -2  -9  -2 28.7083 2.80944   2
   2  -9  -2 21.0762 2.73234   1
  -2  -9   2 30.9819 3.29190   1
  -3  -9  -2 26.4854 2.90814   2
  -3  -9  -2 25.6735 2.92485   1
   3  -9   2 35.1964 3.44190   1
  -3  -9   2 30.4404 3.25602   1
   3  -9  -2 30.7639 3.32071   1
  -4  -9  -2 52.3268 3.75680   2
  -4  -9  -2 47.8484 3.50637   1
   4  -9   2 47.6424 3.64455   1
  -4  -9   2 49.6619 3.76890   1
  -4   9  -2 47.1825 3.40927   3
   4  -9  -2 56.0262 3.89067   1
  -5  -9  -2 41.0138 3.98922   2
   5  -9   2 37.4696 3.79491   1
  -5  -9  -2 37.6671 3.59909   1
  -5   9  -2 33.0280 3.35020   3
  -5  -9   2 38.3526 3.71763   1
   5  -9  -2 27.6841 3.36363   1
  -6  -9  -2 49.7678 3.81168   1
  -6  -9  -2 39.2990 4.15016   2
  -6   9   2 35.3231 3.56581   3
   6  -9   2 44.2556 4.24426   1
  -6  -9   2 40.4147 3.95251   1
   6  -9  -2 46.8778 4.50569   1
  -6   9  -2 35.3552 3.74879   3
  -7   9   2 10.5846 2.30394   3
  -7  -9  -2 13.6442 2.81007   2
   7  -9   2 13.7544 2.66845   1
  -7  -9  -2 7.58001 2.05493   1
  -7   9  -2 10.5090 2.32591   3
   7  -9  -2 10.9533 2.54471   1
  -7  -9   2 7.33280 2.13931   1
  -8   9   2 25.3838 3.33330   3
  -8  -9  -2 34.4325 3.80946   1
  -8  -9  -2 26.1224 3.68688   2
  -8  -9   2 23.7382 3.32963   1
   8  -9  -2 27.2327 3.86599   1
  -8   9  -2 24.7965 3.53324   3
  -9  -9  -2 11.6850 2.76820   2
  -9   9   2 10.0997 2.56180   3
  -9   9  -2 6.87594 2.34620   3
   9  -9  -2 15.1047 3.27666   1
  -9  -9   2 7.82063 2.41722   1
 -10   9  -2 4.86119 2.24897   3
  10  -9  -2 7.53615 2.74533   1
   0 -10   2 2.11211 1.40352   1
   0 -10  -2 0.71931 1.21856   1
  -1 -10  -2 27.8088 3.24516   1
   1 -10   2 20.5270 2.82513   1
   1 -10  -2 30.3622 3.38215   1
  -1 -10   2 21.9835 2.90310   1
   2 -10   2 14.4870 2.43365   1
  -2 -10  -2 11.6469 2.17189   1
   2 -10  -2 10.9139 2.27967   1
  -2 -10   2 14.8108 2.47440   1
  -3 -10  -2 88.3481 4.86833   1
   3 -10   2 90.1820 4.98686   1
  -3 -10  -2 87.5146 4.58135   2
   3 -10  -2 87.4059 5.00275   1
  -3 -10   2 83.5593 4.86928   1
  -4 -10  -2 9.00859 2.11739   2
   4 -10   2 12.0677 2.43376   1
  -4 -10  -2 11.4338 2.36017   1
   4 -10  -2 11.6595 2.36887   1
  -4 -10   2 12.8326 2.40743   1
  -5 -10  -2 31.6441 3.74999   2
   5 -10   2 32.3802 3.72285   1
  -5 -10  -2 25.8346 3.32892   1
  -5 -10   2 29.3705 3.59907   1
  -5  10  -2 28.1616 3.39552   3
   5 -10  -2 33.0165 3.84236   1
  -6 -10  -2 51.9430 4.88441   2
   6 -10   2 53.4348 4.20866   1
  -6 -10  -2 52.5793 4.17395   1
  -6 -10   2 50.7082 4.70822   1
   6 -10  -2 58.2269 5.24662   1
  -6  10  -2 39.9222 3.98620   3
  -7  10   2 5.42310 1.97149   3
   7 -10   2 8.20082 2.37544   1
  -7 -10  -2 10.3472 2.62461   2
  -7 -10  -2 6.39389 2.14636   1
  -7  10  -2 10.6782 2.48954   3
   7 -10  -2 8.44651 2.38070   1
  -7 -10   2 6.84007 2.17108   1
   8 -10   2 3.91693 1.95594   1
  -8 -10  -2 5.28032 2.05559   1
  -8  10   2 3.28780 2.07780   3
  -8 -10  -2 6.53168 2.35187   2
  -8 -10   2 5.76157 2.28887   1
   8 -10  -2 6.32700 2.46998   1
  -8  10  -2 8.73199 2.44017   3
  -9 -10  -2 7.58531 2.59662   2
   9 -10  -2 5.81579 2.46550   1
  -9  10  -2 6.27460 2.31818   3
  -9 -10   2 4.23289 2.26161   1
   0 -11  -2 3.95366 1.75710   1
   0 -11   2 5.52953 1.80023   1
   1 -11   2 17.0666 2.69576   1
  -1 -11  -2 23.4876 3.20427   1
  -1 -11   2 17.1885 2.74288   1
   1 -11  -2 24.6279 3.17566   1
   2 -11   2 10.1586 2.22840   1
  -2 -11  -2 10.6581 2.35409   1
  -2 -11   2 11.5088 2.38516   1
   2 -11  -2 13.5704 2.57907   1
   3 -11   2 17.0009 2.88080   1
  -3 -11  -2 19.3455 2.97971   1
  -3 -11   2 13.6507 2.58003   1
   3 -11  -2 21.3298 3.12255   1
   4 -11   2 6.79396 2.03590   1
  -4 -11  -2 4.80168 1.89369   1
  -4 -11  -2 4.96577 1.85292   2
  -4 -11   2 10.8025 2.48036   1
   4 -11  -2 9.28714 2.26693   1
  -5 -11  -2 2.65528 1.82949   2
   5 -11   2 2.43085 1.85379   1
  -5 -11  -2 3.52636 1.88469   1
   5 -11  -2 3.94649 1.97309   1
  -5 -11   2 3.42070 1.85875   1
  -6 -11  -2 71.4942 4.93894   1
   6 -11   2 74.3168 5.19717   1
  -6 -11  -2 70.8111 5.18433   2
   6 -11  -2 79.4408 5.55159   1
  -6 -11   2 62.4807 4.82377   1
  -7 -11  -2 4.98389 2.22675   1
   7 -11   2 1.69343 1.87718   1
  -7 -11  -2 5.71497 2.37917   2
   7 -11  -2 7.18600 2.36837   1
  -7  11  -2 1.29272 1.81452   3
  -7 -11   2 7.02954 2.33317   1
  -8 -11  -2 28.0485 4.23218   2
   8 -11   2 28.4049 4.16060   1
  -8 -11   2 16.9980 3.11134   1
  -8  11  -2 21.0967 3.42764   3
  -9 -11   2 2.89200 2.07827   1
   0 -12  -2 3.54251 1.81797   1
   0 -12   2 0.42279 1.29456   1
   1 -12   2 18.2133 2.87632   1
  -1 -12  -2 16.4499 2.92224   1
   1 -12  -2 15.5914 2.81757   1
  -1 -12   2 14.2204 2.66282   1
   2 -12   2 2.53232 1.67857   1
  -2 -12  -2 4.67117 2.05494   1
   2 -12  -2 2.33876 1.66334   1
  -2 -12   2 5.80758 2.11432   1
   3 -12   2 14.5020 2.90244   1
  -3 -12  -2 18.3940 2.95602   1
   3 -12  -2 17.6473 2.99920   1
  -3 -12   2 17.6074 3.03015   1
   4 -12   2 35.1113 4.15449   1
  -4 -12  -2 32.7057 3.88351   1
  -4 -12   2 34.8541 4.10307   1
   4 -12  -2 36.6118 4.27338   1
   5 -12   2 17.1079 3.20270   1
  -5 -12  -2 18.6069 3.09820   1
  -5 -12   2 13.7881 2.85512   1
   5 -12  -2 17.8114 3.34558   1
  -6 -12  -2 11.1040 2.71913   2
  -6 -12  -2 14.0585 2.96420   1
   6 -12   2 14.9577 3.08095   1
  -6 -12   2 15.0270 3.06081   1
   6 -12  -2 14.4585 3.15468   1
  -6 -12   2 12.4199 2.82922   2
   7 -12   2 1.44610 1.96908   1
  -7 -12  -2 0.12046 1.84605   1
  -7 -12  -2 -0.6126 1.56970   2
  -7 -12   2 4.15914 2.29747   2
   7 -12  -2 1.42073 1.92838   1
  -7 -12   2 -0.5358 1.75889   1
   0 -13  -2 52.3260 5.02067   1
   0 -13   2 38.7338 4.37655   1
   1 -13   2 3.63571 2.14765   1
  -1 -13  -2 7.18266 2.26953   1
   1 -13  -2 10.6924 2.77560   1
  -1 -13   2 4.40111 2.02494   1
   2 -13   2 3.05490 1.75634   1
  -2 -13  -2 7.15765 2.30165   1
  -2 -13   2 5.56231 2.17235   1
   2 -13  -2 2.11724 1.80059   1
  -3 -13  -2 21.5480 3.39823   1
   3 -13   2 20.2349 3.34309   1
   3 -13  -2 27.9363 3.86288   1
  -3 -13   2 24.1968 3.56522   1
  -4 -13  -2 8.31072 2.47900   1
   4 -13   2 4.98930 2.10916   1
   4 -13  -2 3.82810 2.16150   1
  -4 -13   2 7.26653 2.28791   1
   5 -13   2 -0.1783 1.77875   1
  -5 -13  -2 3.12006 1.95727   1
  -5 -13   2 2.48611 1.83421   1
   5 -13  -2 1.23625 1.95917   1
  -6 -13  -2 3.03276 1.98719   1
   0 -14  -2 5.42690 2.33973   1
   0 -14   2 3.56579 1.90453   1
  -1 -14  -2 -0.4848 1.52585   1
   1 -14   2 2.77203 1.97322   1
  -1 -14   2 1.68218 1.71785   1
   1 -14  -2 2.57205 1.93606   1
  -2 -14  -2 10.5101 2.57777   1
  -3 -14  -2 24.4625 3.73907   1
   0   0  -3 -2.5985 0.24016   1
   0   0  -3 -2.8181 0.25312   2
   1   0  -3 26.7357 1.24711   1
   1   0  -3 25.0412 1.04069   2
  -1   0  -3 26.8282 1.11517   2
  -2   0  -3 171.869 3.86944   2
   2   0   3 168.794 3.37201   1
   2   0  -3 168.660 4.31220   1
  -3   0  -3 0.86471 0.55330   2
   3   0   3 2.50832 0.55195   1
   3   0  -3 2.96858 0.84036   1
   4   0  -3 166.610 5.05809   1
   4   0   3 173.152 4.30283   1
  -4   0  -3 161.162 4.49197   2
  -5   0  -3 8.43041 1.26986   2
   5   0   3 9.56890 1.25811   1
   5   0  -3 9.54819 1.58649   1
   6   0  -3 186.841 6.22965   1
  -6   0  -3 193.890 5.74784   2
   6   0   3 192.439 5.50699   1
  -7   0  -3 38.6034 2.77507   2
   7   0  -3 39.8166 2.95895   1
   7   0   3 38.8602 2.58905   1
  -8   0  -3 214.465 6.91565   2
   8   0   3 208.933 6.63825   1
   8   0  -3 222.165 7.65226   1
   9   0  -3 30.5700 3.44217   1
  -9   0  -3 29.5767 3.08415   2
 -10   0  -3 1.36438 1.29000   2
  10   0  -3 1.44471 1.59363   1
 -12   0  -3 -0.1197 1.61164   3
   0  -1  -3 860.733 14.0854   2
   0   1  -3 853.090 14.1663   3
   0   1  -3 827.768 14.0192   2
   0  -1  -3 827.590 14.6319   1
   0  -1   3 853.777 14.6869   1
   1   1  -3 312.690 5.97300   2
  -1  -1  -3 309.436 5.65006   1
   1  -1   3 314.246 5.75632   1
  -1   1  -3 320.157 5.68262   2
   1  -1  -3 313.439 5.67389   2
   1  -1  -3 305.212 6.36971   1
  -1   1  -3 316.935 6.17841   3
  -1  -1   3 317.164 6.41006   1
  -2  -1  -3 246.934 5.33687   2
  -2  -1  -3 242.303 4.72263   1
   2  -1   3 242.458 4.85581   1
  -2   1   3 246.047 4.72693   3
   2  -1  -3 248.872 4.82619   2
  -2   1  -3 251.295 4.82772   2
   2  -1  -3 244.132 5.70468   1
  -3  -1  -3 104.221 2.75997   1
   3   1  -3 104.540 3.45709   1
   3  -1   3 102.282 2.84107   1
  -3   1   3 102.707 2.78996   3
  -3  -1  -3 100.648 3.22965   2
   3  -1  -3 99.2050 3.43885   1
  -3   1  -3 98.6270 2.76670   2
  -4  -1  -3 116.238 3.77977   2
  -4  -1  -3 107.924 3.23858   1
   4  -1   3 109.278 3.33168   1
   4   1  -3 115.013 4.01943   1
  -4   1   3 114.288 3.36003   3
   4  -1  -3 113.270 4.06761   1
  -4   1  -3 108.004 3.27872   2
  -5  -1  -3 3.02699 1.04026   2
   5  -1   3 3.76854 0.95593   1
  -5  -1  -3 4.75392 1.00145   1
   5   1  -3 2.15170 1.03462   1
   5  -1  -3 5.58629 1.28521   1
  -5   1  -3 2.15334 0.76382   2
  -6  -1  -3 66.5205 3.30245   2
   6  -1   3 61.6862 2.92223   1
  -6  -1  -3 64.2401 3.00295   1
   6   1  -3 64.7126 3.43065   1
  -6   1  -3 66.4999 2.96026   2
   6  -1  -3 56.8551 3.35069   1
  -7  -1  -3 349.244 8.86139   1
  -7   1   3 347.638 8.80427   3
  -7  -1  -3 340.894 9.17005   2
   7  -1   3 355.498 8.98696   1
   7   1  -3 354.039 9.73098   1
   7  -1  -3 349.396 9.87016   1
  -7   1  -3 354.666 8.68077   2
  -8  -1  -3 234.086 7.15197   1
  -8   1   3 231.395 7.18559   3
  -8  -1  -3 233.808 7.50842   2
   8  -1   3 232.586 7.18458   1
   8   1  -3 236.805 7.89021   1
   8  -1  -3 224.247 7.93639   1
  -8   1  -3 239.410 7.06022   2
  -9  -1  -3 21.2493 2.80376   2
  -9   1   3 24.2436 2.74731   3
   9  -1  -3 18.2775 2.74092   1
  -9   1  -3 18.1973 2.39263   2
 -10  -1  -3 8.97518 2.12588   2
 -10   1  -3 15.5338 2.67554   3
  10  -1  -3 10.1903 2.38150   1
 -10  -1   3 10.2724 2.30223   1
 -11  -1  -3 42.1815 4.20227   2
 -11  -1   3 43.5645 4.61437   1
  11  -1  -3 31.1609 3.98114   1
 -11   1  -3 44.5395 4.53054   3
 -12   1  -3 18.5625 3.39037   3
   0   2  -3 901.885 15.1577   2
   0  -2  -3 897.393 16.0895   1
   0  -2   3 903.926 16.1285   1
   0  -2  -3 912.257 15.2233   2
   0   2  -3 922.030 15.5885   3
  -1  -2  -3 112.847 2.84508   1
   1  -2   3 113.527 2.93104   1
  -1  -2  -3 115.721 3.04661   2
  -1  -2   3 115.483 3.27206   1
  -1   2  -3 116.188 2.54176   2
   1  -2  -3 112.875 2.56991   2
   1  -2  -3 110.845 3.19510   1
  -1   2  -3 114.497 3.15054   3
  -2  -2  -3 252.968 5.22808   1
   2  -2   3 253.272 5.38132   1
  -2  -2  -3 245.061 5.65683   2
  -2   2   3 258.168 5.12911   3
  -2  -2   3 249.262 5.93106   1
   2  -2  -3 252.822 5.94253   1
  -2   2  -3 254.215 4.72331   2
   2  -2  -3 252.365 4.73308   2
  -2   2  -3 245.866 5.72497   3
   3  -2   3 187.040 4.63889   1
  -3   2   3 198.955 4.53458   3
  -3  -2  -3 196.224 4.51276   1
  -3  -2  -3 196.423 5.14014   2
   3  -2  -3 198.655 5.40572   1
  -3   2  -3 196.567 4.08255   2
  -3  -2   3 189.115 5.27422   1
  -3   2  -3 194.667 5.17167   3
  -4  -2  -3 262.162 6.60580   2
  -4   2   3 254.832 5.88777   3
  -4  -2  -3 251.720 5.83020   1
   4  -2   3 248.879 6.14959   1
   4  -2  -3 253.568 6.84829   1
  -4   2  -3 251.665 5.41246   2
  -4  -2   3 247.756 6.72651   1
  -5  -2  -3 1.96866 0.95630   2
  -5   2   3 0.99384 0.69646   3
   5  -2   3 0.44484 0.73228   1
  -5  -2  -3 2.71305 0.83663   1
   5  -2  -3 2.24019 0.97108   1
  -5   2  -3 0.96389 0.65383   2
  -5  -2   3 0.11519 0.76159   1
  -5   2  -3 0.85963 0.86308   3
   6  -2   3 104.563 3.98463   1
  -6  -2  -3 101.227 4.31924   2
  -6  -2  -3 100.818 3.77482   1
  -6   2   3 99.3063 3.80363   3
  -6   2  -3 101.833 4.34605   3
  -6  -2   3 93.7969 4.31764   1
   6  -2  -3 96.1068 4.41041   1
  -6   2  -3 107.531 3.57426   2
  -7  -2  -3 9.82175 1.80174   2
   7  -2   3 9.78521 1.67136   1
  -7  -2  -3 7.70346 1.51860   1
  -7   2   3 11.6978 1.75884   3
  -7   2  -3 8.65567 1.76097   3
  -7  -2   3 7.25518 1.71584   1
  -7   2  -3 11.2596 1.53711   2
   7  -2  -3 8.92256 1.87386   1
  -8  -2  -3 129.822 5.65111   2
   8  -2   3 131.838 5.25904   1
  -8   2   3 125.053 5.09196   3
  -8  -2  -3 128.993 5.05726   1
  -8   2  -3 132.607 4.80484   2
  -8   2  -3 125.457 5.59886   3
  -8  -2   3 133.665 5.85424   1
   8  -2  -3 123.787 5.68812   1
  -9   2   3 0.84019 1.15182   3
  -9  -2  -3 -0.3918 1.24978   2
   9  -2  -3 -1.2441 1.15762   1
  -9  -2   3 0.55087 1.26928   1
  -9   2  -3 -0.3890 1.30194   3
 -10  -2  -3 26.6584 3.44453   2
 -10   2  -3 19.3936 2.89678   3
  10  -2  -3 17.2813 2.96474   1
 -10  -2   3 17.3342 2.85548   1
 -11  -2  -3 14.7032 2.89403   2
 -11   2  -3 8.89768 2.42652   3
 -11  -2   3 21.3792 3.31457   1
  11  -2  -3 18.5410 3.22306   1
 -12  -2  -3 11.0859 2.69702   2
 -12   2  -3 8.88749 2.63404   3
   0  -3  -3 0.22696 0.51472   1
   0  -3  -3 0.43298 0.42792   2
   0   3  -3 0.15204 0.49141   3
   0  -3   3 -0.3567 0.44925   1
  -1  -3  -3 639.359 11.8449   2
   1  -3   3 658.700 12.3561   1
  -1  -3  -3 653.156 12.2519   1
  -1  -3   3 636.351 12.5190   1
  -1   3  -3 648.140 12.0950   3
   1  -3  -3 649.618 11.0335   2
  -1   3  -3 664.483 10.9968   2
   1  -3  -3 634.933 12.5415   1
  -2  -3  -3 19.5854 1.32462   1
  -2   3   3 19.0076 1.29025   3
   2  -3   3 17.8379 1.33381   1
  -2  -3  -3 18.7372 1.47308   2
  -2   3  -3 19.9974 1.49938   3
   2  -3  -3 18.7363 1.52427   1
  -2  -3   3 19.3554 1.50884   1
  -2   3  -3 20.7267 0.86840   2
   2  -3  -3 20.0688 0.90500   2
  -3   3   3 32.7454 1.73321   3
   3  -3   3 38.9272 1.97000   1
  -3  -3  -3 36.1191 1.80521   1
  -3  -3  -3 32.2090 2.15884   2
  -3   3  -3 36.7156 1.25613   2
  -3  -3   3 35.1552 2.12488   1
  -3   3  -3 32.9352 2.04542   3
   3  -3  -3 31.1852 2.04384   1
  -4  -3  -3 535.570 10.8933   1
  -4   3   3 544.305 10.7878   3
  -4  -3  -3 532.042 11.5226   2
   4  -3   3 529.830 11.1897   1
  -4   3  -3 538.023 9.58509   2
  -4   3  -3 541.208 11.5538   3
   4  -3  -3 537.928 12.0446   1
  -4  -3   3 542.575 11.8581   1
   5  -3   3 28.1193 2.10869   1
  -5  -3  -3 31.6367 1.96224   1
  -5   3   3 33.6122 2.10678   3
  -5   3  -3 31.5866 2.36884   3
  -5  -3   3 35.5342 2.54662   1
  -5   3  -3 34.3911 1.62939   2
   5  -3  -3 34.9490 2.61976   1
  -6   3   3 109.123 4.05963   3
  -6  -3  -3 115.076 4.72089   2
  -6  -3  -3 106.843 3.94438   1
   6  -3   3 106.694 4.23946   1
  -6   3  -3 99.4742 4.40308   3
  -6  -3   3 105.526 4.60497   1
  -6   3  -3 106.340 3.33916   2
   6  -3  -3 96.0266 4.50846   1
  -7  -3  -3 78.3007 4.11973   2
  -7  -3  -3 64.4928 3.26883   1
  -7   3   3 82.4364 3.73638   3
   7  -3   3 68.1465 3.59437   1
   7  -3  -3 68.2577 4.00727   1
  -7  -3   3 65.7156 3.84939   1
  -7   3  -3 70.9116 3.98775   3
   8  -3   3 14.5922 2.22130   1
  -8   3   3 10.5356 1.89089   3
  -8  -3  -3 7.40714 1.64099   1
  -8  -3  -3 8.52781 2.05128   2
   8  -3  -3 10.1417 2.19840   1
  -8  -3   3 13.4317 2.29730   1
  -8   3  -3 9.12702 1.94417   3
  -9   3   3 22.2717 2.66648   3
  -9  -3  -3 21.3609 3.03544   2
  -9  -3   3 16.5619 2.66023   1
  -9   3  -3 18.3144 2.73894   3
   9  -3  -3 20.0619 3.05748   1
 -10  -3  -3 25.6414 3.38040   2
  10  -3  -3 24.1084 3.35860   1
 -10   3  -3 27.3297 3.45489   3
 -10  -3   3 32.4448 3.80373   1
 -11  -3  -3 16.8700 3.04671   2
 -11  -3   3 17.5855 2.92232   1
  11  -3  -3 13.2028 2.81908   1
 -11   3  -3 15.5319 2.85087   3
 -12  -3  -3 11.2438 2.63462   2
 -12   3  -3 2.44230 2.03565   3
 -13  -3  -3 2.39285 2.22082   2
 -13  -3   3 1.76224 1.96986   2
   0  -4  -3 199.172 4.54117   2
   0  -4   3 199.627 5.25898   1
   0  -4  -3 204.438 5.27833   1
   1  -4   3 465.782 9.93383   1
  -1  -4  -3 468.606 9.84575   1
  -1  -4  -3 470.336 9.39175   2
  -1   4  -3 476.444 9.72818   3
  -1  -4   3 473.140 10.0931   1
   1  -4  -3 492.365 8.52556   2
   1  -4  -3 476.445 10.1434   1
  -2  -4  -3 48.9445 2.47224   2
   2  -4   3 45.4347 2.25321   1
  -2  -4  -3 49.7122 2.27157   1
  -2   4   3 51.1474 2.18094   3
  -2  -4   3 51.2714 2.53891   1
   2  -4  -3 55.7788 2.63234   1
   2  -4  -3 52.8186 1.49196   2
  -2   4  -3 54.2325 2.50093   3
  -3  -4  -3 49.1054 2.33397   1
   3  -4   3 51.6971 2.51324   1
  -3   4   3 46.7974 2.28470   3
  -3  -4  -3 48.8735 2.62129   2
   3  -4  -3 47.0492 2.66062   1
  -3   4  -3 50.1800 2.63533   3
  -3  -4   3 48.1388 2.69092   1
  -3   4  -3 50.4239 1.29197   2
  -4  -4  -3 88.8437 3.88476   2
  -4   4   3 101.311 3.54795   3
  -4  -4  -3 95.8863 3.53167   1
   4  -4   3 105.781 3.86015   1
  -4  -4   3 102.440 4.11668   1
  -4   4  -3 102.327 2.33220   2
   4  -4  -3 101.864 4.18872   1
  -4   4  -3 109.229 4.16859   3
  -5   4   3 21.6787 2.04243   3
   5  -4   3 17.0975 1.91520   1
  -5  -4  -3 20.0007 1.88056   1
   5  -4  -3 20.4752 2.39608   1
  -5   4  -3 17.2720 2.05623   3
  -5   4  -3 16.6069 1.06558   2
  -5  -4   3 18.1175 2.09582   1
   6  -4   3 24.0030 2.46755   1
  -6  -4  -3 19.2559 2.37361   2
  -6   4   3 28.9402 2.50590   3
  -6  -4  -3 25.6833 2.07194   1
  -6   4  -3 23.6419 2.62989   3
  -6  -4   3 24.3549 2.61178   1
   6  -4  -3 27.5608 2.97131   1
  -7   4   3 33.2882 2.89119   3
   7  -4   3 32.0335 3.05478   1
  -7  -4  -3 27.4709 3.08523   2
  -7  -4  -3 29.3132 2.63318   1
  -7  -4   3 23.5401 2.74806   1
   7  -4  -3 28.9581 3.28299   1
  -7   4  -3 27.9183 2.98040   3
  -8  -4  -3 85.2010 4.83242   2
  -8   4   3 86.4903 4.27246   3
   8  -4   3 90.9152 4.60411   1
  -8  -4  -3 90.1302 4.24787   1
   8  -4  -3 92.5115 5.06714   1
  -8   4  -3 90.8832 4.83420   3
  -8  -4   3 94.0992 4.80968   1
  -9   4   3 4.53351 1.63007   3
  -9  -4  -3 3.66562 1.63471   2
  -9  -4   3 2.69495 1.49309   1
  -9   4  -3 2.72998 1.48451   3
   9  -4  -3 5.11768 1.89401   1
 -10  -4  -3 25.3214 3.44681   2
  10  -4  -3 27.3900 3.72680   1
 -10   4  -3 20.0772 3.07937   3
 -10  -4   3 27.3108 3.45775   1
 -11  -4  -3 23.3847 3.56495   2
  11  -4  -3 19.9471 3.37844   1
 -11   4  -3 17.7253 3.15292   3
 -11  -4   3 21.1608 3.20601   1
 -12  -4  -3 44.0482 4.80049   2
 -12   4  -3 31.3333 4.10708   3
   0  -5  -3 281.242 7.10852   1
   0  -5  -3 294.351 6.19709   2
   0  -5   3 275.780 7.11925   1
  -1  -5  -3 8.47760 1.21018   2
   1  -5   3 12.8942 1.59906   1
  -1  -5  -3 11.4555 1.50704   1
  -1  -5   3 12.3573 1.54269   1
   1  -5  -3 14.7644 1.05681   2
   1  -5  -3 15.2717 1.73005   1
  -1   5  -3 10.7310 1.44860   3
   2  -5   3 1.79287 0.83824   1
  -2  -5  -3 2.45759 0.90128   2
  -2  -5  -3 1.84496 0.83590   1
   2  -5  -3 3.89356 0.55383   2
  -2  -5   3 5.69061 1.24959   1
  -2   5  -3 5.79575 1.22996   3
   2  -5  -3 3.17516 1.03279   1
  -3  -5  -3 52.2852 2.80416   2
  -3  -5  -3 48.9336 2.53646   1
  -3   5   3 46.6302 2.38384   3
   3  -5   3 47.5804 2.59466   1
  -3  -5   3 45.9343 2.70811   1
   3  -5  -3 48.0631 1.19593   2
   3  -5  -3 45.2649 2.84114   1
  -3   5  -3 45.7449 2.68685   3
  -4   5   3 280.056 7.14935   3
   4  -5   3 281.515 7.56288   1
  -4  -5  -3 292.309 7.39732   1
  -4  -5  -3 269.475 7.70519   2
   4  -5  -3 287.197 8.12497   1
  -4  -5   3 293.226 7.89883   1
  -4   5  -3 292.560 7.76954   3
  -5   5   3 131.841 4.61057   3
  -5  -5  -3 137.629 5.30167   2
  -5  -5  -3 136.759 4.72048   1
   5  -5   3 133.350 4.98509   1
  -5  -5   3 133.199 5.14017   1
  -5   5  -3 131.605 5.03938   3
   5  -5  -3 137.192 5.39504   1
  -6  -5  -3 5.20649 1.53318   2
   6  -5   3 9.88422 1.76287   1
  -6  -5  -3 7.82312 1.52531   1
  -6   5   3 8.84318 1.63824   3
  -6  -5   3 9.90478 1.80102   1
   6  -5  -3 10.0353 2.06804   1
  -6   5  -3 12.6381 2.07909   3
  -7  -5  -3 3.41530 1.25934   1
  -7   5   3 5.11920 1.49934   3
   7  -5   3 6.28982 1.67373   1
  -7  -5  -3 7.93771 1.84862   2
   7  -5  -3 2.62522 1.43178   1
  -7   5  -3 6.44971 1.71478   3
  -7  -5   3 4.19751 1.54317   1
   8  -5   3 101.950 5.07700   1
  -8  -5  -3 100.600 5.44281   2
  -8  -5  -3 101.687 4.59930   1
  -8   5   3 105.148 4.78312   3
  -8  -5   3 104.568 5.22593   1
   8  -5  -3 93.6658 5.33740   1
  -8   5  -3 92.3341 4.88979   3
  -9   5   3 33.6525 3.35183   3
  -9  -5  -3 32.1466 3.74958   2
  -9  -5   3 31.7529 3.50659   1
   9  -5  -3 30.3829 3.83277   1
  -9   5  -3 27.3139 3.31576   3
 -10  -5  -3 8.70881 2.44621   2
  10  -5  -3 7.28569 2.24065   1
 -10   5  -3 5.67981 1.97994   3
 -10  -5   3 6.68451 2.13017   1
 -11  -5  -3 6.92011 2.33545   2
 -11  -5   3 6.62149 2.32227   1
  11  -5  -3 7.78463 2.39898   1
 -11   5  -3 9.20582 2.49017   3
 -12  -5  -3 7.50240 2.60210   2
 -12   5  -3 11.1583 2.83874   3
   0  -6   3 86.1498 3.77552   1
   0  -6  -3 95.0520 3.10562   2
   0  -6  -3 99.0821 3.91307   1
  -1  -6  -3 203.505 5.36696   2
  -1  -6  -3 207.582 5.97791   1
   1  -6   3 200.488 5.96485   1
  -1  -6   3 188.123 5.94289   1
   1  -6  -3 195.653 6.03799   1
   1  -6  -3 184.688 4.38246   2
  -2  -6  -3 16.7208 1.86922   1
  -2  -6  -3 16.7476 1.87460   2
   2  -6   3 17.5432 1.95962   1
  -2   6  -3 20.6179 2.08236   3
  -2  -6   3 16.3083 1.99816   1
   2  -6  -3 19.6557 2.19830   1
   2  -6  -3 20.6218 1.07511   2
   3  -6   3 104.908 4.25056   1
  -3   6   3 108.922 4.03782   3
  -3  -6  -3 108.662 4.18875   1
  -3  -6  -3 112.751 4.38513   2
  -3   6  -3 110.479 4.39620   3
   3  -6  -3 108.580 4.54113   1
  -3  -6   3 113.028 4.54738   1
  -4   6   3 68.6386 3.31203   3
   4  -6   3 72.6184 3.60067   1
  -4  -6  -3 67.3630 3.70010   2
  -4  -6  -3 68.7129 3.39231   1
  -4  -6   3 68.9999 3.59029   1
  -4   6  -3 70.8998 3.55273   3
   4  -6  -3 63.3651 3.63047   1
  -5  -6  -3 13.1892 1.88651   1
  -5   6   3 20.0703 2.21125   3
  -5  -6  -3 14.7309 2.15198   2
   5  -6   3 17.1033 2.24535   1
  -5   6  -3 16.7084 2.21444   3
   5  -6  -3 15.3499 2.26233   1
  -5  -6   3 14.3607 2.12445   1
  -6  -6  -3 22.2907 2.45402   1
   6  -6   3 22.0187 2.59357   1
  -6   6   3 20.9402 2.37019   3
  -6  -6  -3 21.9966 2.74807   2
   6  -6  -3 19.1888 2.81144   1
  -6   6  -3 24.3931 2.82473   3
  -6  -6   3 21.6505 2.64894   1
  -7   6   3 26.9167 2.80166   3
  -7  -6  -3 32.6053 3.63172   2
  -7  -6  -3 35.6689 2.84614   1
  -7   6  -3 32.1378 3.35645   3
  -7  -6   3 32.8298 3.30995   1
   7  -6  -3 30.2718 3.50730   1
  -8  -6  -3 53.6171 4.82223   2
  -8   6   3 61.3840 3.83663   3
  -8  -6  -3 63.2545 3.81113   1
   8  -6   3 62.9930 4.13088   1
  -8   6  -3 58.4805 4.11642   3
   8  -6  -3 64.3980 4.57718   1
  -8  -6   3 64.6323 4.28245   1
  -9  -6  -3 9.36778 2.37771   2
  -9   6   3 8.31537 2.04676   3
   9  -6  -3 10.3708 2.50103   1
  -9   6  -3 3.76892 1.66596   3
  -9  -6   3 9.26305 2.33045   1
 -10  -6  -3 31.0333 4.04867   2
  10  -6  -3 34.9871 4.35930   1
 -10  -6   3 31.8939 3.85765   1
 -10   6  -3 35.6588 4.07368   3
 -11  -6  -3 16.9914 3.30803   2
  11  -6  -3 20.7572 3.65292   1
 -11   6  -3 28.7989 3.85319   3
 -12   6  -3 7.10530 2.51521   3
   0  -7  -3 2.38230 0.81575   2
   0  -7  -3 3.67265 1.21974   1
   0  -7   3 1.79292 0.96064   1
  -1  -7  -3 13.2439 1.84064   1
   1  -7   3 16.3030 2.01045   1
  -1  -7  -3 13.2583 1.58864   2
  -1  -7   3 19.7563 2.25803   1
   1  -7  -3 14.2729 1.94654   1
   1  -7  -3 14.8949 1.28813   2
  -2  -7  -3 59.1538 3.09442   2
   2  -7   3 53.3680 3.11661   1
  -2  -7  -3 45.8003 2.89962   1
   2  -7  -3 61.9745 3.41926   1
  -2   7  -3 57.3988 3.18285   3
  -2  -7   3 53.5810 3.29982   1
  -3  -7  -3 50.5523 3.11943   1
   3  -7   3 59.8720 3.38777   1
  -3  -7  -3 48.7113 3.12802   2
   3  -7  -3 49.7208 3.23633   1
  -3  -7   3 45.9510 3.10873   1
  -3   7  -3 52.2767 3.10394   3
   4  -7   3 107.036 4.73885   1
  -4  -7  -3 113.449 5.00147   2
  -4   7   3 125.095 4.72673   3
  -4  -7  -3 113.317 4.72823   1
   4  -7  -3 115.982 5.14874   1
  -4   7  -3 117.757 4.94370   3
  -4  -7   3 112.386 5.02068   1
   5  -7   3 149.965 5.88433   1
  -5   7   3 149.548 5.48616   3
  -5  -7  -3 153.216 5.63412   1
  -5  -7  -3 147.058 6.11765   2
  -5   7  -3 152.997 5.86242   3
  -5  -7   3 148.295 5.98566   1
   5  -7  -3 150.738 6.27707   1
  -6  -7  -3 5.87149 1.76972   2
  -6   7   3 5.85285 1.59561   3
   6  -7   3 4.71144 1.51157   1
  -6  -7  -3 7.04531 1.68078   1
  -6   7  -3 4.75296 1.61738   3
   6  -7  -3 7.78499 1.94726   1
  -6  -7   3 7.01004 1.76060   1
   7  -7   3 61.3742 4.06152   1
  -7   7   3 46.4157 3.43364   3
  -7  -7  -3 56.4028 3.65689   1
  -7  -7  -3 57.1011 4.87879   2
  -7   7  -3 55.9028 3.91782   3
   7  -7  -3 50.2553 4.07210   1
  -7  -7   3 58.5071 4.01000   1
  -8  -7  -3 17.7104 2.55491   1
   8  -7   3 12.4826 2.37528   1
  -8   7   3 16.5622 2.55005   3
  -8  -7  -3 11.3310 2.45814   2
  -8  -7   3 17.6616 2.83109   1
  -8   7  -3 14.8562 2.66301   3
   8  -7  -3 20.5869 3.18161   1
  -9   7   3 8.30081 2.08704   3
  -9  -7  -3 2.45491 1.89506   2
  -9  -7   3 9.71519 2.31510   1
   9  -7  -3 9.35417 2.55736   1
  -9   7  -3 9.48898 2.39289   3
 -10  -7  -3 1.21278 1.89456   2
 -10  -7   3 9.75678 2.40605   1
 -10   7  -3 3.90476 1.94014   3
  10  -7  -3 3.51417 2.09779   1
 -11  -7  -3 0.87459 1.76969   2
 -11   7  -3 3.51838 2.16776   3
  11  -7  -3 3.54702 2.24736   1
   0  -8  -3 15.9038 1.64927   2
   0  -8   3 16.3314 2.21974   1
   0  -8  -3 23.2872 2.63879   1
  -1  -8  -3 19.5662 2.34694   1
   1  -8   3 27.0255 2.76778   1
  -1  -8  -3 27.9627 2.37873   2
  -1  -8   3 27.2814 2.83083   1
   1  -8  -3 33.6780 3.16690   1
  -2  -8  -3 161.097 5.56907   2
  -2  -8  -3 156.148 5.85589   1
   2  -8   3 161.599 6.00510   1
  -2  -8   3 170.194 6.22001   1
   2  -8  -3 168.858 6.27583   1
   3  -8   3 199.405 6.91315   1
  -3  -8  -3 207.683 6.85904   1
  -3  -8  -3 206.907 6.76492   2
  -3  -8   3 210.755 7.20796   1
  -3   8  -3 189.543 6.60455   3
   3  -8  -3 195.509 7.08465   1
  -4  -8  -3 24.6102 2.87926   2
  -4  -8  -3 18.8369 2.47895   1
   4  -8   3 22.6362 2.73273   1
  -4  -8   3 23.0431 2.88279   1
  -4   8  -3 23.3610 2.76591   3
   4  -8  -3 20.2517 2.76491   1
  -5  -8  -3 117.808 5.15991   1
  -5   8   3 108.766 4.84455   3
   5  -8   3 104.375 5.06708   1
  -5  -8  -3 105.105 5.20649   2
   5  -8  -3 104.150 5.42290   1
  -5   8  -3 110.453 5.21514   3
  -5  -8   3 105.111 5.15396   1
  -6  -8  -3 34.7156 3.74381   2
  -6  -8  -3 32.5211 3.31526   1
  -6   8   3 35.4710 3.36927   3
   6  -8   3 36.1769 3.71005   1
  -6  -8   3 33.6686 3.54267   1
   6  -8  -3 32.0245 3.65249   1
  -6   8  -3 29.3845 3.30510   3
  -7   8   3 10.1157 2.15038   3
  -7  -8  -3 9.63255 2.31507   2
   7  -8   3 12.3570 2.33812   1
  -7  -8  -3 12.4031 2.26046   1
  -7  -8   3 12.5825 2.49592   1
   7  -8  -3 6.55244 2.11121   1
  -7   8  -3 12.0883 2.34713   3
  -8   8   3 14.0545 2.52390   3
  -8  -8  -3 20.1530 3.29879   2
  -8  -8   3 14.1817 2.68008   1
   8  -8  -3 13.3268 2.73332   1
  -8   8  -3 12.9260 2.54961   3
  -9  -8  -3 0.02884 1.64875   2
   9  -8  -3 2.90517 1.82865   1
  -9  -8   3 -1.8588 1.25052   1
  -9   8  -3 0.33138 1.54328   3
 -10  -8  -3 23.2037 3.62177   2
 -10   8  -3 28.2966 3.76956   3
 -10  -8   3 28.8000 3.83181   1
  10  -8  -3 29.4786 4.25928   1
 -11   8  -3 10.1628 2.68900   3
  11  -8  -3 4.63881 2.48399   1
   0  -9  -3 0.72563 1.07376   1
   0  -9   3 -0.4616 0.93907   1
  -1  -9  -3 11.5049 2.14946   1
   1  -9   3 11.3597 2.06448   1
  -1  -9   3 9.87868 1.93866   1
   1  -9  -3 11.5353 2.18275   1
   2  -9   3 63.6438 3.95199   1
  -2  -9  -3 65.3840 3.57411   2
  -2  -9  -3 71.4379 4.08143   1
  -2  -9   3 67.4665 4.10088   1
   2  -9  -3 67.9781 4.18553   1
  -3  -9  -3 25.1544 2.77579   2
  -3  -9  -3 24.9280 2.90692   1
   3  -9   3 23.3355 2.87273   1
  -3  -9   3 25.7702 3.01116   1
   3  -9  -3 25.8183 3.09709   1
  -4  -9  -3 5.34588 1.81289   2
   4  -9   3 7.96044 2.01066   1
  -4  -9  -3 9.30982 1.98434   1
   4  -9  -3 8.60261 2.03568   1
  -4   9  -3 6.17796 1.78589   3
  -4  -9   3 8.93801 2.05097   1
  -5  -9  -3 55.0395 4.07157   2
  -5  -9  -3 51.7496 3.75164   1
   5  -9   3 55.2142 3.93995   1
   5  -9  -3 54.8040 4.20729   1
  -5   9  -3 42.0311 3.82986   3
  -5  -9   3 55.0354 3.94012   1
   6  -9   3 37.7677 3.89685   1
  -6  -9  -3 31.0492 3.72785   2
  -6  -9  -3 29.0986 3.27195   1
  -6   9   3 29.3232 3.27105   3
  -6  -9   3 22.3352 3.10084   1
  -6   9  -3 18.2430 2.74357   3
   6  -9  -3 31.1805 3.74687   1
   7  -9   3 11.3062 2.45556   1
  -7  -9  -3 7.12209 2.17455   2
  -7  -9  -3 10.8262 2.28617   1
  -7   9   3 8.47869 2.11770   3
  -7  -9   3 12.7834 2.46893   1
  -7   9  -3 14.3321 2.71084   3
   7  -9  -3 15.2791 2.91036   1
  -8  -9  -3 6.26965 2.13534   2
   8  -9   3 7.74256 2.27531   1
  -8   9   3 7.66409 2.12075   3
  -8  -9   3 10.3762 2.44032   1
  -8   9  -3 6.22181 2.16000   3
   8  -9  -3 4.29239 2.17275   1
  -9  -9  -3 1.49686 1.81720   2
  -9   9  -3 1.61609 1.81865   3
  -9  -9   3 5.14501 2.24693   1
   9  -9  -3 6.62487 2.43280   1
 -10   9  -3 3.63332 2.12130   3
 -10  -9   3 9.48156 2.68290   1
  10  -9  -3 6.00938 2.64358   1
   0 -10   3 41.6591 3.89663   1
   0 -10  -3 39.2156 3.76391   1
   1 -10   3 36.6812 3.59418   1
  -1 -10  -3 38.8331 3.70577   1
   1 -10  -3 40.3293 3.82375   1
  -1 -10   3 42.3870 3.40674   1
  -2 -10  -3 6.32815 1.86104   1
   2 -10   3 3.91096 1.54109   1
   2 -10  -3 2.62634 1.49409   1
  -2 -10   3 5.61447 1.79221   1
   3 -10   3 62.7382 4.17201   1
  -3 -10  -3 67.8922 4.34383   1
  -3 -10  -3 71.6358 4.11616   2
  -3 -10   3 63.3627 4.28167   1
   3 -10  -3 64.8790 4.41012   1
  -4 -10  -3 31.5701 3.50158   2
   4 -10   3 28.2570 3.37867   1
  -4 -10  -3 31.2193 3.48363   1
   4 -10  -3 35.6330 3.89931   1
  -4 -10   3 32.5072 3.63155   1
  -5 -10  -3 5.22415 1.86475   1
   5 -10   3 3.76974 1.67943   1
  -5 -10  -3 5.19006 2.00785   2
  -5 -10   3 2.93018 1.70865   1
  -5  10  -3 3.34584 1.72832   3
   5 -10  -3 4.42988 1.75444   1
  -6 -10  -3 3.25004 1.71425   1
   6 -10   3 5.03428 1.98471   1
  -6 -10  -3 6.51578 2.01329   2
  -6 -10   3 0.81733 1.53437   1
  -6  10  -3 2.88505 1.64952   3
   6 -10  -3 2.25367 1.75239   1
  -7 -10  -3 5.20487 2.24064   2
   7 -10   3 7.65435 2.16421   1
  -7 -10  -3 8.87246 2.28597   1
  -7  10  -3 5.43103 2.02990   3
   7 -10  -3 2.79274 1.84868   1
  -7 -10   3 5.71788 2.10481   1
   8 -10   3 7.43648 2.32644   1
  -8 -10  -3 5.69546 2.30571   2
  -8  10   3 6.87399 2.24782   3
   8 -10  -3 7.31507 2.55218   1
  -8 -10   3 5.17173 2.04212   1
  -8  10  -3 3.81447 1.94339   3
  -9 -10  -3 0.98774 1.97879   2
  -9  10  -3 5.69266 2.22434   3
   9 -10  -3 -0.3548 1.87886   1
  -9 -10   3 1.93907 1.97316   1
   0 -11  -3 9.83153 2.35417   1
   0 -11   3 13.9449 2.50640   1
   1 -11   3 10.9015 2.31128   1
  -1 -11  -3 7.03273 2.00992   1
  -1 -11   3 13.7097 2.48475   1
   1 -11  -3 9.21587 2.15698   1
   2 -11   3 1.20299 1.34925   1
  -2 -11  -3 0.23677 1.35765   1
  -2 -11   3 0.87192 1.49864   1
   2 -11  -3 -0.3175 1.37980   1
  -3 -11  -3 5.25118 1.86618   1
   3 -11   3 7.98388 2.07145   1
   3 -11  -3 6.04674 1.99513   1
  -3 -11   3 5.86729 1.92760   1
   4 -11   3 9.02732 2.26022   1
  -4 -11  -3 14.6532 2.58980   2
  -4 -11  -3 6.85622 2.12006   1
   4 -11  -3 9.52479 2.39802   1
  -4 -11   3 11.0572 2.43096   1
  -5 -11  -3 20.2117 3.09294   1
   5 -11   3 25.6482 3.60957   1
  -5 -11  -3 18.6997 3.08823   2
   5 -11  -3 20.7687 3.30332   1
  -5 -11   3 16.9591 3.00654   1
  -6 -11  -3 12.0581 2.52588   1
  -6 -11  -3 9.23605 2.51625   2
   6 -11   3 14.9095 2.81934   1
   6 -11  -3 10.0966 2.65070   1
  -6  11  -3 9.23853 2.35814   3
  -6 -11   3 14.4788 2.91143   1
  -7 -11  -3 4.33841 2.09824   2
  -7 -11  -3 6.04684 2.13403   1
   7 -11   3 9.43268 2.50155   1
  -7 -11   3 9.05270 2.46887   1
   7 -11  -3 5.41039 2.15800   1
  -7  11  -3 6.74323 2.23031   3
  -8 -11  -3 2.60165 2.19353   2
   8 -11   3 0.80708 1.80009   1
  -8  11  -3 4.25410 2.13532   3
  -8 -11   3 0.97712 1.79281   1
   8 -11  -3 4.17182 2.45732   1
   0 -12  -3 7.42182 2.29214   1
   0 -12   3 5.42678 1.97744   1
  -1 -12  -3 30.4061 3.65029   1
   1 -12   3 29.3507 3.68099   1
   1 -12  -3 31.4810 3.93691   1
  -1 -12   3 29.2256 3.59714   1
   2 -12   3 28.4838 3.69936   1
  -2 -12  -3 20.6555 3.26015   1
   2 -12  -3 26.2479 3.52458   1
  -2 -12   3 25.3933 3.54623   1
  -3 -12  -3 48.9005 4.63257   1
   3 -12   3 55.0797 4.36491   1
  -3 -12   3 45.2352 4.55530   1
   3 -12  -3 46.3419 4.69590   1
   4 -12   3 36.6611 4.19684   1
  -4 -12  -3 34.1760 3.99896   1
  -4 -12   3 43.4482 4.52524   1
   4 -12  -3 37.0986 4.32115   1
   5 -12   3 15.3463 2.95073   1
  -5 -12  -3 13.1653 2.75257   1
   5 -12  -3 14.9591 3.00840   1
  -5 -12   3 11.0786 2.74431   1
  -6 -12  -3 10.0366 2.64340   1
   6 -12   3 10.4431 2.65562   1
  -6 -12  -3 2.56837 2.08072   2
   6 -12  -3 7.40575 2.41798   1
  -6 -12   3 4.87982 2.29034   1
  -7 -12  -3 8.84028 2.67711   2
  -7 -12  -3 10.2380 2.60540   1
   7 -12   3 16.1413 3.15893   1
  -7 -12   3 13.3593 2.87788   1
   0 -13   3 9.75369 2.54322   1
   0 -13  -3 11.2189 2.61898   1
  -1 -13  -3 2.10213 1.72473   1
   1 -13   3 -0.6585 1.35814   1
  -1 -13   3 0.51215 1.49346   1
   1 -13  -3 1.75474 1.74134   1
  -2 -13  -3 7.19251 2.27117   1
   2 -13   3 3.69039 1.85598   1
  -2 -13   3 2.65044 1.81026   1
   2 -13  -3 3.82166 1.98942   1
  -3 -13  -3 -1.1634 1.48762   1
   3 -13   3 4.92826 2.10761   1
   3 -13  -3 -0.5251 1.39989   1
  -3 -13   3 4.69128 2.04521   1
  -4 -13  -3 2.19532 1.99521   1
   4 -13   3 4.76766 2.06540   1
   4 -13  -3 4.63552 2.18843   1
  -4 -13   3 3.28717 2.06287   1
  -5 -13  -3 4.83178 2.04153   1
   5 -13   3 6.24771 2.50822   1
   5 -13  -3 9.50060 2.75295   1
  -5 -13   3 4.51582 2.21625   1
  -6 -13  -3 -0.8016 1.40938   1
   0 -14   3 -0.7721 1.58514   1
   0 -14  -3 -0.2727 1.46061   1
  -1 -14  -3 -1.1995 1.31329   1
   1 -14   3 2.23986 1.88401   1
   1 -14  -3 -1.3002 1.34045   1
  -1 -14   3 1.38182 1.73489   1
  -2 -14  -3 17.3046 3.27571   1
  -3 -14  -3 17.8510 3.28354   1
   0   0  -4 288.660 5.43456   1
   0   0  -4 283.019 5.47736   2
  -1   0  -4 127.350 2.97707   2
   1   0  -4 125.938 3.25784   1
   1   0  -4 125.124 2.96441   2
  -2   0  -4 1608.40 26.4899   2
   2   0  -4 1627.16 28.2363   1
   2   0  -4 1566.15 26.4191   2
  -3   0  -4 235.698 5.35126   2
   3   0   4 236.794 4.77501   1
   3   0  -4 231.581 6.00546   1
  -4   0  -4 1.39962 0.68144   2
   4   0   4 0.00642 0.53722   1
   4   0  -4 0.22439 0.81315   1
   5   0   4 68.0054 2.62245   1
   5   0  -4 68.7471 3.44585   1
  -5   0  -4 72.3482 3.04388   2
   6   0  -4 24.9622 2.57577   1
  -6   0  -4 30.2862 2.27494   2
   6   0   4 28.5228 1.91786   1
   7   0   4 96.0931 3.84058   1
  -7   0  -4 95.6422 4.15275   2
   7   0  -4 96.6258 4.64264   1
  -8   0  -4 36.3447 3.14359   2
   8   0  -4 38.6754 3.72448   1
   9   0  -4 9.20221 2.17054   1
  -9   0  -4 6.15722 1.66257   2
  10   0  -4 56.4455 4.20410   1
 -10   0  -4 49.2685 3.70054   2
 -13   0  -4 0.60325 1.89382   3
   0   1  -4 2517.32 40.1075   2
   0  -1  -4 2522.11 40.1281   2
   0  -1  -4 2425.75 41.7693   1
   0   1  -4 2521.45 40.4361   3
   0  -1   4 2489.55 41.8434   1
  -1  -1  -4 491.381 8.85926   2
   1   1  -4 484.719 8.77682   2
   1  -1   4 486.384 8.55904   1
  -1  -1  -4 471.322 8.43184   1
  -1   1  -4 481.195 8.55505   2
   1  -1  -4 478.332 8.58397   2
   1  -1  -4 473.980 9.32118   1
  -1   1  -4 476.771 9.00239   3
  -1  -1   4 495.946 9.44021   1
  -2  -1  -4 45.9588 1.31213   1
   2   1  -4 46.8559 2.12979   1
   2  -1   4 48.9616 1.46447   1
  -2   1   4 46.2914 1.38697   3
   2  -1  -4 49.2054 1.72091   2
   2  -1  -4 46.2057 2.14729   1
  -2   1  -4 52.8618 1.74097   2
  -3  -1  -4 472.406 9.54757   2
   3  -1   4 481.494 9.02821   1
  -3   1   4 481.071 8.77501   3
  -3  -1  -4 469.299 8.78164   1
   3   1  -4 483.046 10.2082   1
   3  -1  -4 474.234 10.2601   1
  -3   1  -4 477.749 8.97740   2
  -4   1   4 502.232 9.75127   3
   4  -1   4 502.253 9.97285   1
   4   1  -4 508.506 11.1925   1
  -4  -1  -4 505.368 9.80448   1
  -4  -1  -4 512.617 10.5342   2
  -4   1  -4 513.881 9.87554   2
   4  -1  -4 500.302 11.2778   1
   5  -1   4 159.575 4.53757   1
  -5  -1  -4 167.398 5.13769   2
   5   1  -4 164.005 5.44318   1
  -5  -1  -4 166.175 4.46096   1
  -5   1   4 165.848 4.56108   3
   5  -1  -4 159.012 5.47295   1
  -5   1  -4 157.810 4.56611   2
  -6   1   4 132.466 4.38021   3
  -6  -1  -4 137.966 4.93341   2
  -6  -1  -4 139.560 4.36214   1
   6  -1   4 137.044 4.41652   1
   6   1  -4 133.392 5.17181   1
  -6   1  -4 137.639 4.44091   2
   6  -1  -4 131.779 5.24859   1
  -7  -1  -4 245.693 6.76172   1
  -7   1   4 236.074 6.73036   3
  -7  -1  -4 250.531 7.35441   2
   7  -1   4 243.387 6.83862   1
   7   1  -4 244.351 7.80370   1
  -7   1  -4 236.165 6.71560   2
   7  -1  -4 248.756 7.99358   1
  -8  -1  -4 81.9178 4.35404   2
   8   1  -4 75.3504 4.34083   1
  -8   1   4 80.7180 3.93598   3
  -8   1  -4 79.1241 3.89793   2
   8  -1  -4 83.9679 4.71881   1
  -9  -1  -4 5.37094 1.73506   2
  -9   1   4 4.25566 1.45443   3
  -9   1  -4 6.43753 1.67552   2
   9  -1  -4 4.40393 1.69208   1
 -10  -1  -4 6.67584 1.93833   2
 -10   1  -4 6.18787 2.09654   3
  10  -1  -4 4.30883 1.90740   1
 -10  -1   4 8.20238 2.21296   1
 -11  -1  -4 11.0068 2.45035   2
 -11  -1   4 18.1394 3.20372   1
 -11   1  -4 16.0004 3.05176   3
  11  -1  -4 12.8031 2.80089   1
 -12   1  -4 20.4699 3.56663   3
 -13   1  -4 10.0539 2.75043   3
   0  -2   4 9890.09 169.878   1
   0  -2  -4 9999.99 168.009   1
   0   2  -4 9972.78 161.004   2
   0  -2  -4 9905.39 160.528   2
   0   2  -4 9978.95 163.611   3
   1  -2   4 297.801 5.92537   1
  -1  -2  -4 290.671 5.80007   1
  -1  -2  -4 277.057 5.95159   2
  -1   2  -4 289.885 5.50959   2
   1  -2  -4 289.728 5.56796   2
  -1  -2   4 289.299 6.34230   1
  -1   2  -4 287.361 6.12427   3
   1  -2  -4 293.660 6.35285   1
  -2   2   4 516.668 9.25652   3
  -2  -2  -4 510.390 10.0046   2
   2  -2   4 523.388 9.70801   1
  -2  -2  -4 515.843 9.53831   1
   2  -2  -4 517.575 9.13128   2
  -2   2  -4 510.964 10.2065   3
  -2   2  -4 524.831 9.12679   2
  -2  -2   4 509.712 10.5549   1
  -3  -2  -4 605.605 11.2903   1
  -3  -2  -4 600.278 11.9670   2
  -3   2   4 612.236 11.1192   3
   3  -2   4 626.270 11.5833   1
  -3   2  -4 614.447 10.8147   2
   3  -2  -4 618.403 12.7299   1
  -3  -2   4 599.824 12.6012   1
  -4  -2  -4 59.7752 2.28640   1
  -4   2   4 66.5393 2.46912   3
  -4  -2  -4 58.5941 2.86373   2
  -4  -2   4 67.9226 3.22399   1
  -4   2  -4 66.0933 2.27140   2
   4  -2  -4 64.3377 3.13485   1
  -4   2  -4 71.2726 3.16031   3
  -5  -2  -4 12.0929 1.29897   1
  -5   2   4 12.5821 1.40166   3
  -5  -2  -4 12.9930 1.75771   2
   5  -2   4 12.5533 1.47749   1
  -5   2  -4 11.1771 1.23002   2
  -5   2  -4 10.5115 1.62369   3
   5  -2  -4 15.3150 1.96702   1
  -5  -2   4 10.5722 1.73015   1
  -6   2   4 21.2811 1.96116   3
  -6  -2  -4 19.8516 2.24544   2
   6  -2   4 19.1726 1.96217   1
  -6  -2  -4 20.7136 1.87798   1
   6  -2  -4 20.9464 2.43780   1
  -6   2  -4 19.1563 1.73803   2
  -6   2  -4 18.6631 2.27583   3
  -6  -2   4 18.6626 2.34343   1
  -7   2   4 3.86532 1.13993   3
   7  -2   4 3.97831 1.18561   1
  -7  -2  -4 6.85162 1.35228   1
  -7  -2  -4 5.48000 1.44918   2
  -7  -2   4 4.70668 1.48048   1
  -7   2  -4 5.98311 1.21659   2
  -7   2  -4 5.13033 1.47620   3
   7  -2  -4 3.76209 1.43176   1
  -8   2   4 100.851 4.42390   3
  -8  -2  -4 108.462 5.07493   2
  -8   2  -4 102.716 4.22922   2
   8  -2  -4 118.520 5.58910   1
  -8  -2   4 104.793 5.33821   1
  -8   2  -4 114.342 5.34357   3
  -9   2   4 31.3214 2.97081   3
  -9  -2  -4 28.5338 3.31576   2
  -9   2  -4 31.0113 3.54196   3
  -9  -2   4 28.1695 3.36861   1
   9  -2  -4 22.3297 3.14169   1
 -10  -2  -4 17.8721 2.84616   2
 -10   2  -4 19.4813 2.94621   3
 -10  -2   4 18.2618 2.95526   1
  10  -2  -4 24.2307 3.45782   1
 -11  -2  -4 16.0615 2.88335   2
 -11  -2   4 16.7393 3.11378   1
 -11   2  -4 12.7400 2.79351   3
  11  -2  -4 15.6501 3.16429   1
 -12  -2  -4 0.88129 1.71712   2
 -12   2  -4 -0.6311 1.78119   3
 -13   2  -4 2.80001 2.20530   3
   0  -3  -4 2.94202 0.62853   2
   0   3  -4 2.88365 0.68621   3
   0  -3   4 1.04568 0.58402   1
   0  -3  -4 4.04362 0.76784   1
   1  -3   4 171.220 4.34082   1
  -1  -3  -4 177.636 4.33926   2
  -1  -3  -4 169.489 4.22260   1
  -1   3  -4 173.885 4.41572   3
   1  -3  -4 177.381 3.76218   2
   1  -3  -4 165.371 4.53511   1
  -1   3  -4 176.060 3.68048   2
  -1  -3   4 171.380 4.60040   1
   2  -3   4 41.3520 1.87155   1
  -2   3   4 43.8747 1.75840   3
  -2  -3  -4 47.0006 2.21732   2
  -2  -3  -4 41.6713 1.80490   1
  -2   3  -4 34.3078 1.96213   3
   2  -3  -4 39.2246 1.40494   2
  -2  -3   4 37.7146 2.08063   1
   2  -3  -4 36.0100 2.06492   1
  -2   3  -4 36.3510 1.34555   2
  -3  -3  -4 247.172 6.30091   2
   3  -3   4 253.553 5.88070   1
  -3   3   4 237.602 5.46800   3
  -3  -3  -4 242.627 5.60869   1
  -3   3  -4 240.356 4.81881   2
  -3   3  -4 244.381 6.32411   3
   3  -3  -4 234.236 6.44026   1
   3  -3  -4 240.903 4.84611   2
  -3  -3   4 255.086 6.57354   1
   4  -3   4 192.732 5.24167   1
  -4  -3  -4 190.632 5.75532   2
  -4   3   4 196.206 5.02747   3
  -4  -3  -4 196.643 4.98711   1
   4  -3  -4 200.478 6.13674   1
  -4   3  -4 198.602 4.31844   2
  -4  -3   4 201.226 6.00447   1
  -4   3  -4 202.106 5.88307   3
   5  -3   4 11.5331 1.48886   1
  -5   3   4 11.2111 1.40005   3
  -5  -3  -4 11.5583 1.36945   1
  -5  -3  -4 11.1901 1.78200   2
  -5  -3   4 14.7800 1.94199   1
  -5   3  -4 13.8176 1.90071   3
   5  -3  -4 13.3150 1.92377   1
  -5   3  -4 10.8525 1.10908   2
  -6  -3  -4 3.24482 1.33755   2
   6  -3   4 6.23156 1.31829   1
  -6  -3  -4 3.83364 1.01918   1
  -6   3   4 4.74615 1.14409   3
  -6   3  -4 6.08324 1.53388   3
  -6  -3   4 7.34010 1.58965   1
   6  -3  -4 5.21210 1.47508   1
  -6   3  -4 4.56584 0.95544   2
  -7  -3  -4 22.8186 2.77257   2
  -7  -3  -4 23.5351 2.23168   1
   7  -3   4 25.5876 2.53284   1
  -7   3   4 26.7116 2.45972   3
  -7  -3   4 24.6133 2.86473   1
   7  -3  -4 24.4727 2.88361   1
  -7   3  -4 25.0553 2.75755   3
  -8   3   4 50.4131 3.16543   3
  -8  -3  -4 53.5454 3.84153   2
  -8  -3   4 48.4922 3.74882   1
  -8   3  -4 40.9115 3.78995   3
   8  -3  -4 53.5483 3.95388   1
  -9  -3  -4 4.13787 1.65768   2
   9  -3  -4 2.54377 1.50805   1
  -9  -3   4 2.16093 1.54447   1
  -9   3  -4 2.51073 1.53004   3
 -10  -3  -4 10.3045 2.35615   2
 -10   3  -4 4.64193 2.04502   3
 -10  -3   4 13.4768 2.64549   1
  10  -3  -4 8.91205 2.39501   1
 -11  -3  -4 13.9306 2.87440   2
  11  -3  -4 14.2444 2.94485   1
 -11  -3   4 11.0816 2.71046   1
 -11   3  -4 9.50654 2.50061   3
 -12  -3  -4 8.19711 2.49250   2
 -12   3  -4 4.64422 2.15253   3
 -13  -3  -4 4.67792 2.36597   2
 -13   3  -4 6.04281 2.24195   3
   0  -4  -4 28.1083 1.81557   1
   0  -4   4 26.6283 1.75168   1
   0   4  -4 27.1012 1.73933   3
   0  -4  -4 29.3477 1.52483   2
   1  -4   4 673.800 13.6046   1
  -1  -4  -4 704.221 13.5577   1
  -1  -4  -4 711.895 13.0733   2
   1  -4  -4 705.208 12.1832   2
   1  -4  -4 688.043 13.8958   1
  -1  -4   4 704.739 13.9426   1
  -1   4  -4 695.920 13.4032   3
   2  -4   4 248.324 6.10475   1
  -2  -4  -4 244.750 5.94955   1
  -2  -4  -4 239.404 6.05504   2
   2  -4  -4 253.231 6.57532   1
  -2   4  -4 238.966 6.15925   3
  -2  -4   4 246.979 6.43354   1
  -2   4  -4 245.923 4.73022   2
   2  -4  -4 241.491 4.83096   2
   3  -4   4 118.222 3.81857   1
  -3   4   4 108.801 3.50026   3
  -3  -4  -4 112.698 3.61423   1
  -3  -4  -4 112.980 4.06526   2
  -3  -4   4 114.629 4.19827   1
  -3   4  -4 115.118 4.09104   3
  -3   4  -4 113.073 2.57055   2
   3  -4  -4 107.530 4.14733   1
   3  -4  -4 109.725 2.59014   2
  -4   4   4 582.782 11.6654   3
   4  -4   4 574.402 12.2138   1
  -4  -4  -4 586.433 11.9409   1
  -4  -4  -4 588.592 12.6900   2
  -4  -4   4 595.405 12.9753   1
  -4   4  -4 570.442 10.1236   2
  -4   4  -4 575.504 12.5936   3
   4  -4  -4 583.542 13.1299   1
   5  -4   4 43.5482 2.57146   1
  -5  -4  -4 46.9377 2.95902   2
  -5   4   4 39.8302 2.30641   3
  -5  -4  -4 44.3025 2.36556   1
  -5   4  -4 39.7313 2.76486   3
  -5  -4   4 41.2120 2.78512   1
  -5   4  -4 42.6656 1.67232   2
   5  -4  -4 41.7951 2.99956   1
   6  -4   4 42.4153 2.80471   1
  -6   4   4 35.0492 2.41229   3
  -6  -4  -4 37.6466 3.33118   2
  -6  -4  -4 39.6064 2.40164   1
  -6   4  -4 40.6711 3.03949   3
  -6  -4   4 38.6835 2.89687   1
   6  -4  -4 44.1195 3.16730   1
  -7  -4  -4 65.7224 3.99197   2
  -7  -4  -4 66.2132 3.26794   1
   7  -4   4 62.1156 3.53113   1
  -7   4   4 59.4590 3.27645   3
  -7   4  -4 63.9740 3.84639   3
   7  -4  -4 63.2196 4.11179   1
  -7  -4   4 62.3989 3.84129   1
  -8  -4  -4 58.3090 4.17961   2
  -8   4   4 59.3449 3.48255   3
   8  -4  -4 52.9815 3.97104   1
  -8  -4   4 54.6468 3.81905   1
  -8   4  -4 58.5311 3.87800   3
  -9  -4  -4 18.2496 2.83890   2
  -9   4  -4 14.6556 2.60163   3
   9  -4  -4 15.8761 2.86555   1
  -9  -4   4 11.5529 2.34109   1
 -10  -4  -4 2.08799 1.65934   2
  10  -4  -4 5.18550 1.98902   1
 -10   4  -4 4.31959 1.89335   3
 -10  -4   4 2.26434 1.68111   1
 -11  -4  -4 51.7584 5.04886   2
 -11  -4   4 50.3014 4.90086   1
  11  -4  -4 58.9426 5.70311   1
 -11   4  -4 52.4467 5.02216   3
 -12  -4  -4 5.27038 2.22562   2
 -12   4  -4 3.39954 2.18630   3
   0  -5  -4 84.3203 3.38138   1
   0  -5   4 83.3705 3.40992   1
   0  -5  -4 83.4765 2.76777   2
   1  -5   4 88.8072 3.46377   1
  -1  -5  -4 92.9822 3.46608   1
  -1  -5  -4 90.3330 3.21239   2
  -1   5  -4 87.9484 3.37765   3
   1  -5  -4 90.1576 2.61529   2
  -1  -5   4 91.2597 3.62760   1
   1  -5  -4 88.7601 3.57652   1
  -2  -5  -4 25.0341 1.89421   1
  -2  -5  -4 29.2499 2.06796   2
   2  -5   4 29.0041 1.97843   1
   2  -5  -4 25.6253 2.08643   1
  -2  -5   4 25.5530 2.06419   1
  -2   5  -4 27.8316 2.12048   3
   2  -5  -4 29.0367 1.28573   2
  -3   5   4 68.3214 2.85560   3
   3  -5   4 61.6058 2.97927   1
  -3  -5  -4 68.7302 2.98669   1
  -3  -5  -4 66.9055 3.18099   2
  -3  -5   4 61.1115 3.15248   1
   3  -5  -4 61.0432 3.21325   1
   3  -5  -4 61.1414 1.69272   2
  -3   5  -4 60.6502 3.11766   3
  -4  -5  -4 52.9480 3.19264   2
   4  -5   4 54.3097 2.90467   1
  -4   5   4 56.9022 2.75795   3
  -4  -5  -4 54.4995 2.70841   1
   4  -5  -4 55.8766 3.23468   1
  -4  -5   4 50.5148 3.02193   1
  -4   5  -4 55.0311 3.08040   3
  -5  -5  -4 3.87390 1.13153   1
  -5   5   4 5.12181 1.24341   3
  -5  -5  -4 3.99931 1.28747   2
   5  -5   4 6.69929 1.41773   1
  -5   5  -4 4.09040 1.28974   3
  -5  -5   4 4.15001 1.32496   1
   5  -5  -4 5.68816 1.40652   1
  -6   5   4 44.4118 2.82667   3
   6  -5   4 40.0762 2.84820   1
  -6  -5  -4 40.0331 3.09345   2
  -6  -5  -4 42.7781 2.67433   1
  -6   5  -4 43.1297 3.23088   3
  -6  -5   4 36.0580 2.87692   1
   6  -5  -4 43.9189 3.34100   1
   7  -5   4 62.7456 3.79692   1
  -7   5   4 70.2663 3.66349   3
  -7  -5  -4 71.1757 3.57380   1
  -7  -5  -4 70.7617 4.28552   2
  -7   5  -4 68.3687 4.07040   3
  -7  -5   4 68.3065 4.07279   1
   7  -5  -4 64.3531 4.24010   1
  -8   5   4 -0.4057 1.14913   3
  -8  -5  -4 0.32941 1.22204   2
  -8  -5   4 1.01543 1.43010   1
   8  -5  -4 0.84495 1.35005   1
  -8   5  -4 3.51590 1.49817   3
  -9  -5  -4 6.17018 2.00536   2
  -9   5  -4 8.88731 2.26005   3
   9  -5  -4 7.81812 2.17803   1
  -9  -5   4 4.94616 1.76321   1
 -10  -5  -4 9.59011 2.36161   2
 -10   5  -4 13.3804 2.69108   3
 -10  -5   4 20.0486 3.19643   1
  10  -5  -4 9.89357 2.55217   1
 -11  -5  -4 0.74791 1.64237   2
 -11  -5   4 1.28643 1.79115   1
  11  -5  -4 1.10174 1.94689   1
 -11   5  -4 -1.4017 1.48807   3
 -12  -5  -4 4.94114 2.31700   2
 -12   5  -4 4.15156 2.09634   3
   0  -6  -4 69.7260 3.32017   1
   0  -6   4 65.5132 3.23686   1
   0  -6  -4 73.3775 2.72217   2
  -1  -6  -4 84.5397 3.27961   2
   1  -6   4 86.3597 3.64189   1
  -1  -6  -4 81.6860 3.53511   1
   1  -6  -4 79.5323 2.57852   2
  -1   6  -4 79.9898 3.43981   3
  -1  -6   4 79.4537 3.61139   1
   1  -6  -4 80.4639 3.63145   1
  -2  -6  -4 101.084 3.89212   1
   2  -6   4 91.4949 3.83774   1
  -2  -6  -4 94.1091 3.73291   2
  -2  -6   4 90.2877 3.94387   1
   2  -6  -4 91.8062 4.02126   1
  -2   6  -4 91.2710 3.84985   3
   2  -6  -4 89.0168 2.46321   2
  -3  -6  -4 2.46373 1.02474   1
   3  -6   4 2.08171 0.97699   1
  -3  -6  -4 0.21868 0.79060   2
  -3  -6   4 3.16367 1.16022   1
   3  -6  -4 2.91045 1.16125   1
  -3   6  -4 3.28465 1.10332   3
   4  -6   4 63.4562 3.31951   1
  -4   6   4 73.9353 3.31234   3
  -4  -6  -4 63.3143 3.54089   2
  -4  -6  -4 63.2110 3.23272   1
   4  -6  -4 65.8218 3.69632   1
  -4  -6   4 63.6466 3.53854   1
  -4   6  -4 71.6533 3.67164   3
  -5  -6  -4 13.9092 1.85233   1
  -5   6   4 14.1894 1.93896   3
   5  -6   4 17.7068 2.28748   1
  -5  -6  -4 15.3268 2.31310   2
  -5  -6   4 16.2711 2.22412   1
   5  -6  -4 17.5712 2.49999   1
  -5   6  -4 16.4160 2.21041   3
  -6  -6  -4 25.4547 2.97270   2
   6  -6   4 19.8896 2.47943   1
  -6   6   4 18.8766 2.30929   3
  -6  -6  -4 19.3938 2.27752   1
  -6  -6   4 15.7821 2.35565   1
  -6   6  -4 16.2952 2.41641   3
   6  -6  -4 18.3348 2.75780   1
  -7   6   4 9.26066 1.83783   3
  -7  -6  -4 13.6274 2.04003   1
  -7  -6  -4 13.5742 2.40160   2
  -7  -6   4 11.7748 2.27717   1
   7  -6  -4 8.57511 2.09679   1
  -7   6  -4 15.3216 2.46633   3
  -8   6   4 71.4258 4.02658   3
  -8  -6  -4 76.2507 4.90109   2
   8  -6  -4 68.8852 4.82369   1
  -8   6  -4 66.9628 4.31473   3
  -8  -6   4 73.4916 4.58298   1
  -9  -6  -4 11.6715 2.50407   2
  -9  -6   4 13.3681 2.54207   1
   9  -6  -4 10.2081 2.47674   1
  -9   6  -4 11.0688 2.52810   3
 -10  -6  -4 4.60086 2.11609   2
  10  -6  -4 5.10665 2.30592   1
 -10   6  -4 3.83966 1.84809   3
 -10  -6   4 4.28220 1.95344   1
 -11  -6  -4 12.2780 2.93140   2
  11  -6  -4 6.27832 2.66951   1
 -11   6  -4 0.90823 1.81341   3
 -11  -6   4 5.95454 2.16123   1
 -12   6  -4 1.70632 1.85489   3
   0  -7   4 24.4242 2.45276   1
   0  -7  -4 17.4128 1.65464   2
   0  -7  -4 17.9190 2.15847   1
  -1  -7  -4 36.2887 2.59420   1
   1  -7   4 36.7377 2.58692   1
  -1  -7  -4 38.1205 2.33140   2
  -1  -7   4 37.1067 2.65791   1
   1  -7  -4 39.7050 2.75778   1
   1  -7  -4 39.6470 1.86746   2
  -2  -7  -4 41.6897 2.64988   2
  -2  -7  -4 45.7831 2.92154   1
   2  -7   4 43.0862 2.80644   1
   2  -7  -4 43.0261 3.03746   1
  -2  -7   4 42.6392 2.89624   1
  -2   7  -4 43.6735 2.80911   3
  -3  -7  -4 19.4368 2.29436   2
  -3  -7  -4 16.2756 2.06823   1
   3  -7   4 20.9921 2.35374   1
   3  -7  -4 20.9333 2.49845   1
  -3   7  -4 19.5804 2.29733   3
  -3  -7   4 19.0470 2.35031   1
  -4  -7  -4 12.0629 1.87485   1
  -4  -7  -4 11.1203 1.96008   2
   4  -7   4 11.0730 1.84344   1
  -4   7  -4 10.0339 1.84354   3
  -4  -7   4 9.44124 1.84557   1
   4  -7  -4 13.3471 2.12678   1
  -5  -7  -4 46.5920 3.15507   1
   5  -7   4 47.7477 3.31413   1
  -5  -7  -4 47.0912 3.62037   2
  -5   7   4 45.6246 3.05854   3
  -5   7  -4 51.9721 3.51374   3
   5  -7  -4 54.6941 3.80497   1
  -5  -7   4 43.7588 3.37392   1
  -6   7   4 19.8422 2.43121   3
   6  -7   4 20.2229 2.67599   1
  -6  -7  -4 18.4678 2.69700   2
  -6  -7  -4 19.0768 2.39597   1
  -6  -7   4 19.9473 2.74526   1
  -6   7  -4 14.3009 2.33099   3
   6  -7  -4 18.8827 2.77416   1
  -7  -7  -4 27.6133 3.41670   2
   7  -7   4 21.1505 2.82754   1
  -7  -7  -4 18.7834 2.55197   1
  -7   7   4 18.8721 2.52663   3
  -7  -7   4 21.3360 2.89501   1
   7  -7  -4 21.5192 3.20004   1
  -7   7  -4 20.1401 2.84036   3
  -8   7   4 10.3170 2.11730   3
  -8  -7  -4 10.1504 2.33723   2
  -8  -7   4 11.1552 2.28353   1
  -8   7  -4 5.59001 2.00516   3
   8  -7  -4 6.98683 2.11768   1
  -9  -7  -4 14.0804 2.80682   2
   9  -7  -4 16.3529 3.10057   1
  -9  -7   4 11.3208 2.50600   1
  -9   7  -4 13.6097 2.63848   3
 -10  -7  -4 17.6663 3.36592   2
 -10  -7   4 19.5480 3.32600   1
  10  -7  -4 20.6108 3.60536   1
 -10   7  -4 16.8180 2.95067   3
  11  -7  -4 46.6048 5.49702   1
 -11  -7   4 55.2021 5.30185   1
 -11   7  -4 44.7393 4.73331   3
   0  -8  -4 21.9731 2.49241   1
   0  -8   4 27.4663 2.77535   1
   0  -8  -4 28.8493 2.01974   2
  -1  -8  -4 4.99525 1.18379   2
   1  -8   4 5.78980 1.44774   1
  -1  -8  -4 5.31420 1.46457   1
   1  -8  -4 6.84313 1.61693   1
  -1  -8   4 6.55621 1.55078   1
  -2  -8  -4 37.4340 2.85216   1
   2  -8   4 46.5800 3.12540   1
  -2  -8  -4 41.5642 2.82209   2
  -2  -8   4 42.7768 3.20800   1
   2  -8  -4 44.3429 3.18309   1
  -3  -8  -4 0.25112 1.10998   2
   3  -8   4 1.58521 1.16518   1
  -3  -8  -4 2.86425 1.26405   1
  -3   8  -4 3.90738 1.40362   3
   3  -8  -4 3.26315 1.31097   1
  -3  -8   4 0.11124 1.01041   1
   4  -8   4 1.65387 1.21491   1
  -4  -8  -4 0.67668 1.08342   1
  -4  -8  -4 0.16064 1.12688   2
   4  -8  -4 1.41301 1.24957   1
  -4  -8   4 0.71401 1.26081   1
  -4   8  -4 -0.7205 1.00140   3
  -5  -8  -4 73.7961 4.12014   1
   5  -8   4 77.1587 4.31847   1
  -5  -8  -4 77.4753 4.46984   2
  -5  -8   4 80.6791 4.54635   1
  -5   8  -4 73.8010 4.28240   3
   5  -8  -4 84.6061 4.79730   1
  -6  -8  -4 34.0575 3.76951   2
  -6   8   4 31.2289 3.14845   3
   6  -8   4 32.5742 3.46365   1
  -6  -8  -4 31.2942 3.14220   1
   6  -8  -4 32.3468 3.72760   1
  -6  -8   4 33.5774 3.48739   1
  -6   8  -4 29.9169 3.35973   3
  -7   8   4 19.3404 2.68314   3
  -7  -8  -4 20.5999 2.81489   1
   7  -8   4 19.5353 2.87625   1
  -7  -8  -4 20.9318 3.05605   2
  -7  -8   4 15.5833 2.58922   1
   7  -8  -4 15.0176 2.82108   1
  -7   8  -4 15.7531 2.66689   3
  -8  -8  -4 3.70682 1.85379   2
  -8   8   4 5.68637 1.90555   3
  -8  -8   4 7.04142 2.10838   1
   8  -8  -4 9.37332 2.44952   1
  -8   8  -4 5.87759 2.00233   3
  -9  -8  -4 13.3978 2.81149   2
  -9  -8   4 14.1609 2.86748   1
   9  -8  -4 18.3522 3.39090   1
  -9   8  -4 14.0842 2.85337   3
 -10  -8  -4 15.7073 3.20757   2
  10  -8  -4 18.9488 3.53343   1
 -10  -8   4 13.3747 2.81914   1
 -10   8  -4 11.5005 2.83973   3
  11  -8  -4 3.47798 2.25889   1
 -11   8  -4 -3.2699 1.53490   3
   0  -9  -4 3.39367 1.38290   1
   0  -9   4 4.51843 1.60494   1
   1  -9   4 41.8343 3.18822   1
  -1  -9  -4 43.0638 3.22725   1
  -1  -9   4 40.1125 3.20043   1
   1  -9  -4 42.2605 3.35089   1
  -2  -9  -4 52.8561 3.22801   2
  -2  -9  -4 53.4676 3.60816   1
   2  -9   4 56.6690 3.73679   1
  -2  -9   4 55.1096 3.75989   1
   2  -9  -4 51.4470 3.67745   1
   3  -9   4 15.7702 2.42409   1
  -3  -9  -4 11.1704 2.17851   1
  -3  -9  -4 11.3539 2.09547   2
  -3  -9   4 10.1074 2.12329   1
   3  -9  -4 7.65988 1.93592   1
   4  -9   4 2.43539 1.38580   1
  -4  -9  -4 2.37501 1.48449   1
  -4  -9  -4 2.10154 1.34770   2
  -4  -9   4 5.48459 1.83938   1
   4  -9  -4 4.34213 1.65065   1
  -4   9  -4 4.78450 1.70112   3
  -5  -9  -4 38.9728 3.71192   1
   5  -9   4 42.7277 3.43119   1
  -5  -9  -4 39.9926 3.91984   2
   5  -9  -4 46.7548 4.42684   1
  -5  -9   4 37.7527 3.89059   1
  -5   9  -4 40.7137 3.85349   3
  -6  -9  -4 1.86905 1.63213   2
  -6  -9  -4 4.21400 1.66716   1
   6  -9   4 1.80399 1.42706   1
  -6  -9   4 2.56564 1.69600   1
   6  -9  -4 2.69786 1.55568   1
  -6   9  -4 1.63214 1.44528   3
  -7  -9  -4 9.89130 2.54188   2
   7  -9   4 11.1799 2.44051   1
  -7   9   4 10.0002 2.25603   3
  -7  -9  -4 13.3867 2.45573   1
   7  -9  -4 5.22127 1.97480   1
  -7   9  -4 8.51153 2.31513   3
  -7  -9   4 12.4648 2.61618   1
  -8  -9  -4 17.4328 3.18255   2
  -8   9   4 21.4731 3.00894   3
   8  -9  -4 14.0922 3.07919   1
  -8  -9   4 18.2462 3.03583   1
  -8   9  -4 18.3715 3.12754   3
  -9  -9  -4 34.8260 4.37293   2
  -9   9  -4 30.0277 3.84006   3
   9  -9  -4 30.4036 4.51232   1
  -9  -9   4 33.1329 4.09327   1
 -10   9  -4 2.95271 1.96023   3
  10  -9  -4 2.89927 2.12342   1
 -10  -9   4 0.66445 1.70526   1
   0 -10  -4 1.94534 1.38722   1
   0 -10   4 2.69864 1.39919   1
  -1 -10  -4 9.53911 2.03833   1
   1 -10   4 9.23244 2.04119   1
   1 -10  -4 12.1613 2.27883   1
  -1 -10   4 7.22670 1.87833   1
   2 -10   4 66.2940 4.16484   1
  -2 -10  -4 58.3010 4.05541   1
   2 -10  -4 66.1301 4.40798   1
  -2 -10   4 58.2445 4.10317   1
  -3 -10  -4 2.05000 1.46507   1
   3 -10   4 2.29806 1.43280   1
  -3 -10  -4 -1.1073 1.10352   2
   3 -10  -4 -1.2505 1.06397   1
  -3 -10   4 1.92202 1.53078   1
  -4 -10  -4 23.1095 2.98856   2
   4 -10   4 20.1151 2.96725   1
  -4 -10  -4 27.6193 3.30648   1
   4 -10  -4 26.4230 3.53722   1
  -4 -10   4 18.2807 2.87616   1
   5 -10   4 43.3191 4.24223   1
  -5 -10  -4 37.2165 3.79724   1
  -5 -10  -4 36.1792 3.87413   2
   5 -10  -4 40.5742 4.38012   1
  -5 -10   4 28.3791 3.45786   1
  -5  10  -4 26.5233 3.22209   3
   6 -10   4 12.0778 2.56781   1
  -6 -10  -4 11.3491 2.46233   2
  -6 -10  -4 9.27627 2.13635   1
  -6 -10   4 9.11832 2.28860   1
   6 -10  -4 8.57751 2.35050   1
  -6  10  -4 9.74634 2.31443   3
  -7 -10  -4 3.44607 2.02819   2
  -7 -10  -4 1.02206 1.55340   1
   7 -10   4 4.42214 1.97001   1
   7 -10  -4 0.16633 1.59426   1
  -7  10  -4 1.24573 1.71941   3
  -7 -10   4 1.14474 1.67384   1
  -8 -10  -4 68.6723 5.22846   2
   8 -10  -4 52.5593 5.59744   1
  -8 -10   4 62.2353 4.91712   1
  -8  10  -4 50.8216 4.92840   3
  -9 -10   4 4.58434 2.06742   1
  -9  10  -4 5.83814 2.28654   3
   9 -10  -4 8.52039 2.67103   1
   0 -11   4 2.63473 1.49902   1
   0 -11  -4 1.31211 1.44271   1
   1 -11   4 12.4309 2.33381   1
  -1 -11  -4 9.11782 2.21506   1
   1 -11  -4 13.7160 2.65265   1
  -1 -11   4 5.53597 1.90392   1
   2 -11   4 38.1815 3.88529   1
  -2 -11  -4 37.2058 3.85596   1
   2 -11  -4 43.9105 4.38364   1
  -2 -11   4 27.2649 3.41693   1
   3 -11   4 5.69998 1.94382   1
  -3 -11  -4 5.40167 1.97349   1
  -3 -11   4 5.27870 2.01266   1
   3 -11  -4 2.96945 1.65411   1
   4 -11   4 12.9594 2.65369   1
  -4 -11  -4 8.47834 2.29326   1
  -4 -11  -4 8.83104 2.15979   2
   4 -11  -4 8.65839 2.31445   1
  -4 -11   4 8.78523 2.27412   1
  -5 -11  -4 0.70704 1.53496   1
   5 -11   4 0.09927 1.48609   1
  -5 -11  -4 1.24548 1.67812   2
  -5 -11   4 -0.2706 1.39829   1
   5 -11  -4 1.08992 1.69946   1
  -6 -11  -4 7.61304 2.28090   1
  -6 -11  -4 7.45968 2.44948   2
   6 -11   4 15.2155 2.86627   1
  -6 -11   4 13.6883 2.88676   1
   6 -11  -4 14.0271 2.95247   1
  -6  11  -4 8.26190 2.29304   3
  -7 -11  -4 29.9493 4.11981   2
   7 -11   4 27.2108 3.77692   1
  -7  11  -4 20.1142 3.26050   3
   7 -11  -4 27.2442 3.98496   1
  -7 -11   4 24.6397 3.66066   1
  -8 -11  -4 2.32990 2.27192   2
   8 -11  -4 3.41964 2.41943   1
  -8 -11   4 0.59143 1.60527   1
  -8  11  -4 4.76226 2.07873   3
   0 -12  -4 11.0248 2.46361   1
   0 -12   4 14.6315 2.74991   1
   1 -12   4 1.42026 1.37604   1
  -1 -12  -4 2.52519 1.64470   1
  -1 -12   4 2.61911 1.61603   1
   1 -12  -4 -0.4565 1.26608   1
   2 -12   4 11.3259 2.49442   1
  -2 -12  -4 11.1568 2.50525   1
  -2 -12   4 8.68742 2.38319   1
   2 -12  -4 8.89430 2.42011   1
  -3 -12  -4 19.5135 3.12604   1
   3 -12   4 17.4093 3.02411   1
   3 -12  -4 21.5106 3.39525   1
  -3 -12   4 14.9117 2.76516   1
   4 -12   4 31.3427 3.96284   1
  -4 -12  -4 25.7152 3.50638   1
   4 -12  -4 28.5120 3.86456   1
  -4 -12   4 29.5243 3.95534   1
   5 -12   4 17.8894 3.24598   1
  -5 -12  -4 15.2434 3.00479   1
   5 -12  -4 11.4675 2.80703   1
  -5 -12   4 15.5590 3.12178   1
  -6 -12  -4 2.56819 1.77767   1
   6 -12   4 1.18306 1.73933   1
  -6 -12  -4 4.77252 2.15812   2
   6 -12  -4 0.72276 1.72427   1
  -6 -12   4 3.63145 1.82807   1
   7 -12   4 15.1265 3.23206   1
  -7 -12  -4 15.7219 3.33390   2
  -7 -12   4 18.4645 3.39173   1
   0 -13   4 0.14728 1.43768   1
   0 -13  -4 0.79979 1.62309   1
   1 -13   4 11.7458 2.49890   1
  -1 -13  -4 14.1836 2.85713   1
   1 -13  -4 17.5448 3.19102   1
  -1 -13   4 13.8996 2.77603   1
   2 -13   4 28.3683 3.79991   1
  -2 -13  -4 33.3640 4.08559   1
   2 -13  -4 25.3344 3.75512   1
  -2 -13   4 23.4545 3.57613   1
   3 -13   4 12.0357 2.65674   1
  -3 -13  -4 6.16116 2.32499   1
   3 -13  -4 8.72059 2.55582   1
  -3 -13   4 11.6442 2.72439   1
  -4 -13  -4 4.43934 1.94961   1
   4 -13   4 2.14096 1.84248   1
   4 -13  -4 5.09229 2.30635   1
  -4 -13   4 1.82547 1.77849   1
   5 -13   4 28.7770 4.09407   1
  -5 -13  -4 20.7127 3.50502   1
  -5 -13   4 18.8795 3.39406   1
  -6 -13  -4 17.6644 3.23310   1
   0 -14  -4 2.98857 1.98153   1
   0 -14   4 3.56694 1.95153   1
   1 -14   4 4.88104 2.19654   1
  -1 -14  -4 4.73462 2.20712   1
   1 -14  -4 7.51866 2.37742   1
  -2 -14  -4 0.48290 1.73748   1
  -3 -14  -4 -0.7695 1.45855   1
   0   0  -5 -0.4110 0.55409   2
   0   0  -5 -0.8134 0.44380   1
  -1   0  -5 801.180 13.8691   2
   1   0  -5 815.850 14.7031   1
   1   0  -5 787.771 13.8365   2
   2   0  -5 0.57013 0.52376   2
   2   0  -5 1.44854 0.75061   1
  -2   0  -5 -0.1095 0.53612   2
   3   0  -5 14.8878 1.57758   1
   3   0   5 14.2415 0.77436   1
  -3   0  -5 17.2871 1.43908   2
   4   0  -5 49.0940 2.75047   1
   4   0   5 51.5444 1.86353   1
  -4   0  -5 54.2672 2.39592   2
   5   0   5 192.435 4.81705   1
   5   0  -5 193.297 6.19759   1
  -5   0  -5 199.339 5.50923   2
   6   0  -5 80.3454 4.01704   1
   6   0   5 78.7957 3.01416   1
  -6   0  -5 81.3652 3.52721   2
   7   0  -5 5.52694 1.54734   1
  -7   0  -5 5.90623 1.45361   2
  -8   0  -5 -0.4473 0.94387   2
   8   0  -5 0.21960 1.17449   1
   9   0  -5 5.23120 1.92376   1
  -9   0  -5 6.94765 1.73321   2
 -10   0  -5 5.37935 1.74865   2
  10   0  -5 2.12152 1.65156   1
  11   0  -5 0.87323 1.45570   1
 -12   0   5 20.8661 3.67760   1
 -13   0  -5 4.47930 2.30461   3
   0  -1  -5 135.942 3.28707   2
   0  -1   5 132.725 3.21250   1
   0  -1  -5 128.186 3.21432   1
   0   1  -5 133.935 3.04791   3
   1  -1   5 98.3024 2.31257   1
  -1  -1  -5 96.2013 2.22719   1
  -1  -1  -5 101.004 2.83138   2
   1   1  -5 94.8642 2.77158   2
  -1   1  -5 102.087 2.72971   2
   1  -1  -5 106.474 3.07047   1
   1  -1  -5 103.941 2.77074   2
  -1   1  -5 99.1422 2.90902   3
  -1  -1   5 104.161 3.10545   1
  -2   1   5 212.527 3.96080   3
  -2  -1  -5 215.993 4.01570   1
  -2  -1  -5 220.406 5.07355   2
   2   1  -5 215.298 5.39838   1
   2  -1   5 216.090 4.20067   1
   2   1  -5 215.000 4.95329   2
   2  -1  -5 218.959 5.46534   1
   2  -1  -5 213.013 4.66004   2
  -2   1  -5 219.260 4.66516   2
  -3  -1  -5 14.6658 1.40823   2
  -3   1   5 12.4761 0.91728   3
   3   1  -5 17.0042 1.72647   1
   3  -1   5 15.4935 0.93390   1
  -3  -1  -5 14.4471 0.80590   1
   3  -1  -5 13.3611 1.16090   2
  -3   1  -5 13.4268 1.19046   2
   3  -1  -5 12.2618 1.50040   1
   4  -1   5 485.666 9.49458   1
  -4  -1  -5 484.224 10.2390   2
   4   1  -5 492.923 11.0662   1
  -4  -1  -5 483.022 9.26121   1
  -4   1   5 496.279 9.32750   3
   4  -1  -5 488.394 11.1295   1
  -4   1  -5 484.494 9.64762   2
  -5   1   5 256.844 6.04659   3
   5   1  -5 270.291 7.52633   1
  -5  -1  -5 257.401 6.79951   2
   5  -1   5 260.319 6.13562   1
  -5  -1  -5 256.040 5.93174   1
   5  -1  -5 270.688 7.60418   1
  -5   1  -5 249.772 6.28158   2
  -6  -1  -5 51.2764 3.01432   2
  -6   1   5 55.3936 2.58883   3
  -6  -1  -5 56.6686 2.52508   1
   6   1  -5 56.5482 3.34035   1
   6  -1   5 53.3571 2.54652   1
  -6   1  -5 56.2294 2.80829   2
   6  -1  -5 54.5213 3.41616   1
   7   1  -5 98.4016 4.74367   1
  -7   1   5 102.093 3.91797   3
  -7  -1  -5 102.984 4.52631   2
  -7  -1  -5 96.3352 3.75705   1
   7  -1  -5 97.0639 4.79592   1
  -7   1  -5 105.410 4.17051   2
  -8   1   5 120.852 4.72623   3
   8   1  -5 126.840 5.78186   1
  -8  -1  -5 116.533 5.20730   2
  -8   1  -5 123.438 4.84357   2
   8  -1  -5 118.734 5.65178   1
  -9  -1  -5 62.7073 3.99811   2
   9  -1  -5 55.1556 4.08471   1
  -9   1  -5 55.4698 3.45309   2
 -10  -1  -5 17.0709 2.68452   2
 -10  -1   5 17.3060 2.99695   1
 -10   1  -5 22.6991 3.38416   3
  10  -1  -5 22.7170 3.32257   1
 -11  -1  -5 73.7717 4.77873   2
  11  -1  -5 78.6385 5.40660   1
 -11   1  -5 69.8606 5.07466   3
 -11  -1   5 75.9341 5.36984   1
 -12   1  -5 22.3038 3.65707   3
 -12  -1   5 21.3232 3.67911   1
 -13   1  -5 3.15931 2.07603   3
   0  -2  -5 18.8769 1.27165   2
   0  -2  -5 16.1393 1.23568   1
   0   2  -5 14.5547 1.13158   3
   0  -2   5 15.5919 1.22816   1
   0   2  -5 15.5939 1.18676   2
  -1  -2  -5 761.037 13.6344   2
   1  -2   5 780.026 13.7761   1
   1   2  -5 764.932 13.5892   2
  -1  -2  -5 753.880 13.6116   1
  -1  -2   5 758.931 14.3524   1
   1  -2  -5 730.039 14.2647   1
   1  -2  -5 763.977 13.2622   2
  -1   2  -5 788.021 13.2499   2
  -1   2  -5 772.835 13.8667   3
  -2  -2  -5 116.774 3.56385   2
  -2  -2  -5 125.282 2.97394   1
  -2   2   5 126.064 2.87281   3
   2  -2   5 119.561 3.06081   1
   2  -2  -5 124.305 3.90017   1
   2  -2  -5 128.427 3.09325   2
  -2  -2   5 123.632 3.90526   1
  -2   2  -5 121.706 3.71535   3
  -2   2  -5 125.819 3.07103   2
  -3  -2  -5 251.343 6.23757   2
  -3  -2  -5 249.970 5.25352   1
  -3   2   5 249.669 5.20201   3
   3  -2   5 252.961 5.49474   1
  -3   2  -5 262.307 5.35050   2
  -3  -2   5 253.236 6.64490   1
   3  -2  -5 249.007 6.64379   1
   3  -2  -5 249.300 5.32008   2
  -3   2  -5 262.513 6.47308   3
  -4  -2  -5 427.066 9.42686   2
   4  -2   5 414.179 8.61284   1
  -4   2   5 414.000 8.32492   3
  -4  -2  -5 417.625 8.31519   1
  -4   2  -5 426.076 9.76441   3
  -4  -2   5 419.306 10.0747   1
   4  -2  -5 423.865 10.0996   1
  -4   2  -5 417.764 8.28068   2
  -5  -2  -5 50.6460 2.17081   1
  -5  -2  -5 56.2346 3.01501   2
   5  -2   5 52.3692 2.42481   1
  -5   2   5 49.1898 2.29961   3
  -5  -2   5 51.0292 3.12773   1
   5  -2  -5 55.3469 3.18267   1
  -5   2  -5 51.1654 2.24945   2
  -5   2  -5 54.1813 3.06767   3
  -6   2   5 3.36680 0.97778   3
   6  -2   5 5.37543 1.11968   1
  -6  -2  -5 1.38355 0.92407   2
  -6  -2  -5 4.52886 0.96645   1
  -6   2  -5 3.27411 0.88293   2
  -6   2  -5 5.45521 1.39741   3
   6  -2  -5 1.28557 1.01931   1
  -6  -2   5 4.09451 1.40576   1
   7  -2   5 1.86283 0.95173   1
  -7  -2  -5 2.05950 1.16548   2
  -7  -2  -5 1.53255 0.95283   1
  -7   2   5 1.88243 0.99010   3
  -7   2  -5 4.70739 1.53244   3
  -7  -2   5 3.18055 1.36639   1
  -7   2  -5 2.65939 0.98904   2
   7  -2  -5 2.79607 1.28501   1
  -8  -2  -5 36.5358 3.46498   2
  -8   2   5 40.9408 2.89474   3
  -8   2  -5 37.2391 2.73946   2
   8  -2  -5 43.3772 4.07608   1
  -8  -2   5 48.0034 4.26827   1
  -8   2  -5 45.8014 4.01621   3
  -9  -2  -5 1.25428 1.37843   2
  -9   2  -5 3.69116 1.67706   3
  -9  -2   5 3.13093 1.58669   1
   9  -2  -5 1.12360 1.41307   1
 -10  -2  -5 12.8921 2.48444   2
 -10  -2   5 12.0232 2.49563   1
  10  -2  -5 9.69227 2.52654   1
 -10   2  -5 16.5222 2.89709   3
 -11  -2  -5 9.04562 2.35966   2
 -11   2  -5 8.05160 2.42460   3
 -11  -2   5 17.0346 3.20652   1
  11  -2  -5 7.24303 2.48470   1
 -12  -2  -5 7.48848 2.34239   2
 -12  -2   5 5.17136 2.40841   1
 -12   2  -5 6.42696 2.36282   3
 -13   2  -5 0.82890 1.67817   3
   0  -3  -5 741.827 14.3214   1
   0  -3   5 765.758 14.4308   1
   0  -3  -5 759.281 13.5294   2
   0   3  -5 770.301 13.4865   2
   0   3  -5 775.798 13.8884   3
   1  -3   5 620.959 11.8513   1
  -1  -3  -5 625.153 11.5912   2
  -1  -3  -5 621.723 11.7257   1
   1  -3  -5 608.059 12.2384   1
   1  -3  -5 615.524 10.9915   2
  -1   3  -5 604.209 11.7633   3
  -1  -3   5 616.560 12.2348   1
  -1   3  -5 616.239 10.9056   2
   2  -3   5 6.19786 0.92440   1
  -2  -3  -5 5.24026 1.01720   2
  -2  -3  -5 5.54639 0.82288   1
  -2   3  -5 5.17401 0.99771   3
  -2  -3   5 7.12381 1.12102   1
   2  -3  -5 6.71717 0.77330   2
   2  -3  -5 6.09171 1.16967   1
  -2   3  -5 8.03644 0.80548   2
  -3   3   5 1898.86 31.2870   3
  -3  -3  -5 1904.35 32.2452   1
  -3  -3  -5 1908.90 32.2141   2
   3  -3   5 1885.04 32.5356   1
  -3   3  -5 1864.72 30.4450   2
   3  -3  -5 1613.49 33.4888   1
  -3   3  -5 1881.64 32.6584   3
   3  -3  -5 1912.17 30.5174   2
  -3  -3   5 1876.84 33.6995   1
   4  -3   5 32.8198 1.94353   1
  -4   3   5 30.8304 1.76568   3
  -4  -3  -5 34.8311 1.79026   1
  -4  -3  -5 34.2606 2.42995   2
  -4  -3   5 34.8425 2.45587   1
  -4   3  -5 33.3623 1.59153   2
   4  -3  -5 35.3991 2.51676   1
  -4   3  -5 33.8940 2.39713   3
  -5  -3  -5 33.4355 1.88392   1
  -5   3   5 34.1865 2.01529   3
  -5  -3  -5 35.3011 2.91798   2
   5  -3   5 31.4684 2.02567   1
  -5   3  -5 31.3130 1.65360   2
   5  -3  -5 32.6471 2.56620   1
  -5   3  -5 35.5435 2.57442   3
  -5  -3   5 28.0494 2.70595   1
  -6   3   5 15.7539 1.71881   3
  -6  -3  -5 17.8995 1.74819   1
   6  -3   5 18.0976 1.96166   1
  -6  -3  -5 19.7688 2.42436   2
  -6   3  -5 15.4195 2.19800   3
  -6  -3   5 14.3769 2.21171   1
  -6   3  -5 16.7942 1.54176   2
   6  -3  -5 17.2664 2.35141   1
   7  -3   5 12.2956 1.79866   1
  -7   3   5 11.7242 1.69184   3
  -7  -3  -5 10.8919 1.56070   1
  -7  -3  -5 8.37968 1.79285   2
  -7   3  -5 11.5293 2.04339   3
  -7  -3   5 7.31760 1.77613   1
   7  -3  -5 9.72346 2.04134   1
  -8  -3  -5 23.7625 2.90623   2
  -8   3   5 30.6698 2.76925   3
  -8   3  -5 25.5961 3.02599   3
   8  -3  -5 31.5734 3.53418   1
  -8  -3   5 27.4869 3.27441   1
  -9  -3  -5 141.942 6.41268   2
  -9  -3   5 152.473 6.84058   1
   9  -3  -5 160.041 7.07306   1
  -9   3  -5 149.121 6.55093   3
 -10  -3  -5 6.99894 2.11004   2
 -10  -3   5 6.10260 2.06825   1
 -10   3  -5 3.87234 1.90369   3
  10  -3  -5 5.00956 2.10711   1
 -11  -3  -5 0.87354 1.60104   2
 -11   3  -5 -0.1568 1.38887   3
  11  -3  -5 2.93593 1.99329   1
 -11  -3   5 -0.5848 1.47438   1
 -12  -3  -5 -0.3568 1.67241   2
 -12  -3   5 -0.0330 1.77502   1
  12  -3  -5 1.96404 1.94835   1
 -12   3  -5 1.50888 1.85190   3
   0  -4  -5 18.9320 1.38534   2
   0   4  -5 19.0556 1.60369   3
   0  -4   5 18.6238 1.69783   1
   0  -4  -5 18.4679 1.70935   1
  -1  -4  -5 93.3715 3.17854   1
  -1  -4  -5 92.0505 3.15969   2
   1  -4   5 89.9967 3.26046   1
   1  -4  -5 87.9585 3.37088   1
  -1  -4   5 91.8691 3.46741   1
   1  -4  -5 95.7026 2.71121   2
  -1   4  -5 100.422 3.43469   3
  -1   4  -5 98.9173 2.67985   2
  -2  -4  -5 134.519 3.97570   1
  -2  -4  -5 131.419 4.20793   2
   2  -4   5 135.459 4.08745   1
   2  -4  -5 139.610 3.31617   2
   2  -4  -5 132.447 4.47239   1
  -2  -4   5 131.855 4.40486   1
  -2   4  -5 133.621 4.34024   3
  -2   4  -5 136.316 3.18544   2
  -3   4   5 104.762 3.32878   3
  -3  -4  -5 102.521 3.41723   1
  -3  -4  -5 116.934 4.11685   2
   3  -4   5 102.896 3.57435   1
  -3   4  -5 109.055 2.69856   2
  -3  -4   5 114.550 4.20687   1
   3  -4  -5 95.4356 3.99561   1
   3  -4  -5 105.234 2.70303   2
  -3   4  -5 108.584 3.99816   3
  -4   4   5 281.145 6.54967   3
  -4  -4  -5 266.377 6.58103   1
  -4  -4  -5 274.768 7.44401   2
   4  -4   5 268.908 6.85712   1
  -4   4  -5 276.418 5.51212   2
  -4   4  -5 274.554 7.45152   3
  -4  -4   5 266.577 7.54760   1
  -5   4   5 6.86609 1.18681   3
   5  -4   5 4.16288 1.07461   1
  -5  -4  -5 5.22512 1.37675   2
  -5  -4  -5 5.35340 1.09563   1
   5  -4  -5 4.52450 1.47432   1
  -5  -4   5 6.35980 1.54187   1
  -5   4  -5 5.59899 1.36418   3
  -5   4  -5 5.04814 0.81161   2
  -6  -4  -5 0.17675 0.74469   1
  -6   4   5 -0.0771 0.80552   3
   6  -4   5 1.65487 0.92242   1
  -6  -4  -5 -1.1798 0.84690   2
  -6  -4   5 0.12173 0.92083   1
   6  -4  -5 0.89817 1.09757   1
  -6   4  -5 0.58454 1.05561   3
   7  -4   5 23.1666 2.53378   1
  -7  -4  -5 20.1677 2.67410   2
  -7   4   5 21.1291 2.26317   3
  -7  -4  -5 20.1189 2.11395   1
  -7  -4   5 18.6137 2.56187   1
  -7   4  -5 22.8528 2.83149   3
   7  -4  -5 23.5345 3.04136   1
  -8  -4  -5 180.102 7.16551   2
  -8   4   5 195.237 6.33531   3
   8  -4  -5 190.018 7.71781   1
  -8   4  -5 202.415 7.46056   3
  -8  -4   5 192.084 7.38646   1
  -9  -4  -5 7.01403 1.98953   2
  -9  -4   5 9.93648 2.39348   1
  -9   4  -5 6.46021 1.94500   3
   9  -4  -5 9.39414 2.34039   1
 -10  -4  -5 25.1556 3.46918   2
 -10   4  -5 29.2074 3.73838   3
  10  -4  -5 29.7084 3.87896   1
 -10  -4   5 26.8881 3.61744   1
 -11  -4  -5 7.42440 2.33234   2
 -11   4  -5 3.37913 1.88661   3
 -11  -4   5 6.62374 2.30982   1
  11  -4  -5 1.95629 1.78163   1
 -12  -4  -5 6.18848 2.37178   2
  12  -4  -5 6.15558 2.47877   1
 -12   4  -5 5.91025 2.22033   3
   0  -5  -5 115.229 4.03288   1
   0  -5  -5 115.856 3.43734   2
   0  -5   5 112.078 4.07227   1
  -1  -5  -5 39.2511 2.14412   2
   1  -5   5 34.7478 2.16913   1
  -1  -5  -5 38.5547 2.27952   1
   1  -5  -5 37.4935 2.35273   1
  -1   5  -5 36.7905 2.31828   3
   1  -5  -5 37.3395 1.73179   2
  -1  -5   5 39.7512 2.37771   1
   2  -5   5 59.6480 2.81190   1
  -2  -5  -5 60.0675 2.82702   2
  -2  -5  -5 61.8988 2.75507   1
  -2  -5   5 61.2065 3.05188   1
  -2   5  -5 65.1979 3.06806   3
   2  -5  -5 59.2778 2.02936   2
   2  -5  -5 69.3422 3.24631   1
  -3  -5  -5 128.565 4.62565   2
  -3  -5  -5 136.632 4.37214   1
   3  -5   5 132.145 4.47099   1
   3  -5  -5 130.274 3.06405   2
  -3  -5   5 132.984 4.87814   1
  -3   5  -5 140.964 4.82834   3
  -3   5  -5 133.084 3.00603   2
   3  -5  -5 126.284 4.88310   1
   4  -5   5 29.6107 2.16329   1
  -4  -5  -5 29.0387 2.03443   1
  -4   5   5 32.9044 2.10643   3
  -4  -5  -5 26.7510 2.63622   2
   4  -5  -5 25.9793 2.63917   1
  -4  -5   5 25.7774 2.58326   1
  -4   5  -5 26.1970 2.51622   3
  -5  -5  -5 202.282 5.91051   1
   5  -5   5 217.882 6.39797   1
  -5  -5  -5 209.715 6.80097   2
  -5   5   5 199.437 5.80225   3
  -5   5  -5 205.566 6.70149   3
  -5  -5   5 210.191 6.85871   1
   5  -5  -5 188.978 7.06326   1
  -6   5   5 30.2737 2.57840   3
  -6  -5  -5 32.0392 3.22614   2
   6  -5   5 29.0754 2.69804   1
  -6  -5  -5 32.3932 2.32981   1
  -6  -5   5 31.3611 3.07791   1
  -6   5  -5 27.5763 2.92961   3
   6  -5  -5 32.4990 3.41495   1
   7  -5   5 37.3386 2.95965   1
  -7   5   5 34.1591 2.66167   3
  -7  -5  -5 38.3459 2.64852   1
  -7  -5  -5 34.9703 3.51292   2
  -7  -5   5 35.6153 3.43847   1
  -7   5  -5 36.5386 3.53092   3
   7  -5  -5 39.1589 3.88136   1
  -8   5   5 73.1744 3.93588   3
  -8  -5  -5 67.8054 4.42763   2
  -8  -5   5 67.9678 4.44814   1
  -8   5  -5 70.3347 4.50160   3
   8  -5  -5 79.4204 4.91649   1
  -9  -5  -5 7.00799 2.14786   2
  -9  -5   5 12.7509 2.46760   1
   9  -5  -5 8.14199 2.23136   1
  -9   5  -5 10.7602 2.33201   3
 -10  -5  -5 9.86912 2.55026   2
 -10  -5   5 5.63611 2.06337   1
 -10   5  -5 7.98470 2.29430   3
  10  -5  -5 5.65434 2.18858   1
 -11  -5  -5 5.09924 2.36414   2
 -11  -5   5 2.63846 1.83488   1
 -11   5  -5 5.06155 2.21522   3
  11  -5  -5 3.95051 2.18733   1
 -12  -5  -5 0.64360 1.93615   2
 -12   5  -5 4.77128 2.21949   3
   0  -6  -5 10.7830 1.58020   1
   0  -6  -5 8.98381 1.15786   2
   0  -6   5 12.4431 1.68599   1
   1  -6   5 3.04090 1.02504   1
  -1  -6  -5 4.75801 1.03644   2
  -1  -6  -5 4.44199 1.13375   1
  -1  -6   5 3.16809 1.10138   1
   1  -6  -5 5.66764 1.34971   1
  -1   6  -5 5.09576 1.16618   3
   1  -6  -5 4.33838 0.82650   2
  -2  -6  -5 87.7958 3.65339   1
  -2  -6  -5 80.8333 3.44025   2
   2  -6   5 80.8776 3.60908   1
  -2  -6   5 79.8675 3.74429   1
   2  -6  -5 81.6341 3.81904   1
  -2   6  -5 83.3126 3.71174   3
   2  -6  -5 82.3453 2.48537   2
  -3  -6  -5 2.12781 0.96095   1
  -3  -6  -5 1.40487 0.97040   2
   3  -6   5 2.05533 0.99886   1
  -3  -6   5 1.40070 1.05144   1
   3  -6  -5 0.98828 0.90897   1
  -3   6  -5 4.20577 1.26152   3
   4  -6   5 0.65644 0.83137   1
  -4  -6  -5 0.29678 0.82980   2
  -4  -6  -5 1.90238 1.03380   1
  -4   6   5 4.32856 1.15601   3
  -4  -6   5 1.77403 1.06190   1
  -4   6  -5 2.63339 1.12320   3
   4  -6  -5 1.45081 1.06650   1
  -5   6   5 11.1933 1.67655   3
  -5  -6  -5 9.69657 1.87206   2
   5  -6   5 8.85368 1.68776   1
  -5  -6  -5 9.93386 1.66260   1
  -5  -6   5 7.37783 1.72516   1
  -5   6  -5 6.06859 1.55223   3
   5  -6  -5 10.0661 1.99821   1
  -6  -6  -5 150.664 5.40199   1
  -6  -6  -5 157.113 6.26894   2
  -6   6   5 146.756 5.31989   3
   6  -6   5 152.097 5.74638   1
  -6   6  -5 150.519 6.10886   3
   6  -6  -5 161.734 6.70527   1
  -6  -6   5 146.218 6.10974   1
  -7   6   5 76.4122 3.91171   3
   7  -6   5 78.5857 4.17194   1
  -7  -6  -5 65.2494 3.69562   1
  -7  -6  -5 69.4999 4.42516   2
   7  -6  -5 69.1280 4.56813   1
  -7  -6   5 64.9363 4.16775   1
  -7   6  -5 73.2333 4.45175   3
  -8  -6  -5 59.8239 4.39832   2
  -8  -6   5 60.9188 4.19512   1
   8  -6  -5 53.7865 4.31154   1
  -8   6  -5 60.2324 4.24777   3
  -9  -6  -5 10.6417 2.51006   2
  -9  -6   5 8.57502 2.22650   1
   9  -6  -5 16.0612 3.10387   1
  -9   6  -5 13.8476 2.57565   3
 -10  -6  -5 21.2506 3.36108   2
 -10   6  -5 26.2043 3.65513   3
  10  -6  -5 26.5896 3.95086   1
 -10  -6   5 19.3310 3.16801   1
 -11  -6  -5 0.63845 1.75620   2
  11  -6  -5 3.02215 2.27921   1
 -11   6  -5 4.52713 2.05940   3
 -11  -6   5 2.95725 1.89715   1
   0  -7  -5 223.291 5.72208   2
   0  -7   5 233.067 7.07571   1
   0  -7  -5 229.590 6.98548   1
   1  -7   5 3.11196 1.15492   1
  -1  -7  -5 4.75816 1.08395   2
  -1  -7  -5 4.24544 1.25180   1
  -1  -7   5 2.58136 1.09299   1
   1  -7  -5 1.76291 1.03752   1
   1  -7  -5 1.04025 0.66021   2
  -2  -7  -5 67.6703 3.49347   1
   2  -7   5 70.8532 3.62541   1
  -2  -7  -5 70.9963 3.42354   2
  -2  -7   5 68.2326 3.74093   1
   2  -7  -5 73.9729 3.83991   1
  -2   7  -5 72.6808 3.63539   3
   3  -7   5 9.90183 1.72445   1
  -3  -7  -5 11.7280 1.87527   2
  -3  -7  -5 7.07451 1.48667   1
  -3   7  -5 10.0478 1.76407   3
   3  -7  -5 12.2203 2.04176   1
  -3  -7   5 11.9939 2.00403   1
   4  -7   5 280.925 8.28895   1
  -4  -7  -5 294.800 8.52988   2
  -4  -7  -5 288.813 8.16387   1
  -4   7  -5 279.103 8.42575   3
   4  -7  -5 311.777 9.26650   1
  -4  -7   5 291.007 8.80323   1
  -5  -7  -5 44.8632 3.93224   2
  -5  -7  -5 52.9342 3.19321   1
  -5   7   5 48.0799 3.07005   3
   5  -7   5 56.4470 3.49926   1
  -5  -7   5 51.4557 3.56512   1
  -5   7  -5 47.9362 3.48037   3
   5  -7  -5 58.1865 3.86350   1
   6  -7   5 58.2645 3.73180   1
  -6   7   5 60.4921 3.50353   3
  -6  -7  -5 55.3132 3.40981   1
  -6  -7  -5 52.2611 3.88316   2
  -6   7  -5 63.8095 3.97211   3
  -6  -7   5 44.1373 3.50349   1
   7  -7   5 3.97552 1.46838   1
  -7   7   5 2.74191 1.42142   3
  -7  -7  -5 2.82195 1.43467   1
  -7  -7  -5 1.80821 1.45437   2
  -7  -7   5 3.82826 1.68223   1
  -7   7  -5 3.15496 1.56491   3
   7  -7  -5 2.57797 1.49514   1
  -8  -7  -5 1.65364 1.45552   2
   8  -7  -5 2.85304 1.68184   1
  -8  -7   5 1.47308 1.49034   1
  -8   7  -5 2.63741 1.63135   3
  -9  -7  -5 1.99720 1.70209   2
   9  -7  -5 2.36808 1.92068   1
  -9  -7   5 0.39581 1.47993   1
  -9   7  -5 1.38970 1.62778   3
 -10  -7  -5 10.0061 2.72977   2
 -10   7  -5 15.4442 3.06060   3
  10  -7  -5 16.0771 3.33186   1
 -10  -7   5 12.6708 2.78157   1
 -11   7  -5 27.0252 3.92597   3
 -11  -7   5 34.7395 4.34676   1
  11  -7  -5 32.7653 4.69543   1
   0  -8  -5 1.35275 1.00193   1
   0  -8  -5 1.30121 0.80860   2
   0  -8   5 0.27786 0.93827   1
  -1  -8  -5 31.3999 2.96249   1
   1  -8   5 37.4531 2.81802   1
  -1  -8  -5 35.1072 2.47486   2
   1  -8  -5 33.8448 3.25006   1
  -1  -8   5 31.5055 3.05336   1
  -2  -8  -5 63.6104 3.55373   1
  -2  -8  -5 57.7000 3.28063   2
   2  -8   5 57.4951 3.46648   1
  -2   8  -5 55.9258 3.48571   3
  -2  -8   5 66.3091 3.88884   1
   2  -8  -5 62.0233 3.77845   1
  -3  -8  -5 0.77132 1.03775   2
  -3  -8  -5 1.06791 1.16212   1
   3  -8   5 1.60230 1.22559   1
  -3  -8   5 1.37338 1.21140   1
  -3   8  -5 3.85303 1.39880   3
   3  -8  -5 3.62711 1.50490   1
  -4  -8  -5 3.97931 1.42988   2
  -4  -8  -5 2.75975 1.35297   1
   4  -8   5 4.62795 1.47975   1
   4  -8  -5 3.50002 1.60442   1
  -4   8  -5 3.11725 1.45214   3
  -4  -8   5 3.23231 1.46513   1
  -5  -8  -5 69.2955 3.94864   1
   5  -8   5 66.5430 4.01134   1
  -5  -8  -5 68.3286 4.24843   2
  -5  -8   5 69.2343 4.32967   1
  -5   8  -5 56.6092 3.88862   3
   5  -8  -5 70.7911 4.51069   1
   6  -8   5 7.76858 1.92938   1
  -6   8   5 5.57476 1.74114   3
  -6  -8  -5 6.84256 1.91216   2
  -6  -8  -5 5.99668 1.62636   1
  -6  -8   5 5.98521 1.91957   1
   6  -8  -5 6.75564 2.03600   1
  -6   8  -5 7.81473 1.97417   3
  -7   8   5 0.55119 1.35660   3
  -7  -8  -5 0.86299 1.35270   2
   7  -8   5 0.65873 1.36172   1
   7  -8  -5 0.18133 1.34093   1
  -7   8  -5 -0.1566 1.23387   3
  -7  -8   5 -0.9854 1.22169   1
  -8  -8  -5 4.49808 1.94593   2
  -8  -8   5 5.87453 1.99929   1
  -8   8  -5 2.16005 1.61829   3
   8  -8  -5 0.83659 1.50720   1
  -9  -8  -5 0.82077 1.58625   2
  -9  -8   5 2.30449 1.77901   1
   9  -8  -5 2.86195 1.95821   1
  -9   8  -5 2.07619 1.72681   3
 -10  -8  -5 0.53530 1.70281   2
 -10   8  -5 2.91706 1.92089   3
  10  -8  -5 0.72179 1.91935   1
 -10  -8   5 0.83000 1.74111   1
 -11  -8   5 17.2777 3.28095   1
   0  -9  -5 132.224 5.71649   1
   0  -9   5 132.210 5.69794   1
  -1  -9  -5 48.5269 3.50443   1
   1  -9   5 45.0040 3.27716   1
  -1  -9   5 47.2414 3.45068   1
   1  -9  -5 45.2500 3.38024   1
  -2  -9  -5 33.2788 3.25214   1
  -2  -9  -5 28.9440 2.79128   2
   2  -9   5 32.8887 3.26826   1
   2  -9  -5 29.1163 3.20692   1
  -2  -9   5 29.7636 3.25529   1
  -3  -9  -5 163.560 6.39045   1
  -3  -9  -5 176.034 6.32999   2
   3  -9   5 177.401 6.77021   1
  -3  -9   5 181.950 7.03743   1
   3  -9  -5 177.747 7.11613   1
  -3   9  -5 162.601 6.41100   3
  -4  -9  -5 17.5270 2.53212   1
   4  -9   5 14.9739 2.41523   1
  -4  -9  -5 14.9940 2.39888   2
  -4   9  -5 10.7398 2.06886   3
  -4  -9   5 15.9936 2.55969   1
   4  -9  -5 12.6579 2.42255   1
  -5  -9  -5 42.3737 3.80317   1
  -5  -9  -5 38.6562 3.91038   2
   5  -9   5 39.6656 3.76565   1
  -5  -9   5 42.4138 4.06169   1
   5  -9  -5 56.7728 4.14102   1
  -5   9  -5 42.7647 3.98546   3
  -6  -9  -5 49.8329 4.56492   2
   6  -9   5 44.5221 4.18134   1
  -6  -9  -5 45.1092 3.57541   1
  -6   9  -5 44.2805 4.11565   3
  -6  -9   5 42.8883 4.16141   1
   6  -9  -5 45.5734 4.56491   1
   7  -9   5 5.79152 1.89420   1
  -7  -9  -5 7.90093 2.31394   2
   7  -9  -5 1.55690 1.69368   1
  -7   9  -5 2.77518 1.67595   3
  -7  -9   5 6.53328 2.17892   1
  -8  -9  -5 11.2181 2.58001   2
  -8  -9   5 9.09844 2.52809   1
   8  -9  -5 8.22903 2.56843   1
  -8   9  -5 11.9767 2.67088   3
  -9  -9  -5 15.0691 3.07006   2
  -9   9  -5 12.4637 2.88226   3
  -9  -9   5 13.6897 2.85902   1
   9  -9  -5 11.9392 3.07561   1
 -10  -9   5 9.22937 2.57699   1
 -10   9  -5 6.75320 2.25235   3
  10  -9  -5 9.62004 2.91276   1
   0 -10  -5 -0.1716 1.13000   1
   0 -10   5 0.37423 1.20079   1
  -1 -10  -5 21.5331 2.80264   1
   1 -10   5 20.5323 2.79599   1
  -1 -10   5 23.5965 3.03133   1
   1 -10  -5 18.2816 2.78859   1
  -2 -10  -5 8.02443 1.95599   1
   2 -10   5 10.9590 2.19537   1
  -2 -10   5 7.58375 1.92424   1
   2 -10  -5 5.08899 1.79260   1
  -3 -10  -5 44.2595 3.47767   1
   3 -10   5 51.2568 3.85975   1
  -3 -10  -5 45.0936 3.88407   2
  -3 -10   5 43.1727 4.09804   1
   3 -10  -5 49.6341 3.88312   1
  -4 -10  -5 3.49802 1.62325   1
   4 -10   5 8.04762 2.11004   1
  -4 -10  -5 3.06700 1.62462   2
  -4  10  -5 5.82539 1.96590   3
   4 -10  -5 11.3562 2.45219   1
  -4 -10   5 5.50767 1.86049   1
  -5 -10  -5 7.82209 2.08010   1
  -5 -10  -5 6.00984 2.05051   2
   5 -10   5 7.71437 2.14356   1
  -5 -10   5 3.67588 1.81091   1
   5 -10  -5 3.78843 1.80705   1
  -5  10  -5 2.22164 1.73058   3
  -6 -10  -5 25.8853 3.24156   1
  -6 -10  -5 25.6839 3.45281   2
   6 -10   5 22.9765 3.26303   1
  -6  10  -5 16.3944 2.76445   3
   6 -10  -5 22.8598 3.43178   1
  -6 -10   5 24.8645 3.42025   1
  -7 -10  -5 47.1397 4.75775   2
   7 -10   5 52.6316 4.16089   1
  -7 -10   5 53.7983 5.04886   1
  -7  10  -5 40.6545 4.27935   3
  -8 -10  -5 9.70626 2.60232   2
   8 -10  -5 9.36275 2.79113   1
  -8 -10   5 12.6045 2.87174   1
  -8  10  -5 10.9494 2.70846   3
   9 -10  -5 14.8808 3.47322   1
  -9 -10   5 19.9503 3.47543   1
  -9  10  -5 16.2062 3.14226   3
   0 -11   5 0.71472 1.30407   1
   0 -11  -5 -0.4317 1.35739   1
  -1 -11  -5 9.25355 2.17630   1
   1 -11   5 4.61884 1.71537   1
   1 -11  -5 4.13750 1.82357   1
  -1 -11   5 7.87183 2.16044   1
   2 -11   5 25.4449 3.25451   1
  -2 -11  -5 21.9276 3.13763   1
  -2 -11   5 23.6663 3.27416   1
   2 -11  -5 23.4489 3.29283   1
   3 -11   5 14.5515 2.67529   1
  -3 -11  -5 14.0476 2.64617   1
  -3 -11   5 11.6772 2.46963   1
   3 -11  -5 11.7538 2.51423   1
  -4 -11  -5 8.95786 2.16709   1
  -4 -11  -5 5.83458 2.02655   2
   4 -11   5 14.3711 2.73299   1
   4 -11  -5 13.0647 2.74760   1
  -4 -11   5 10.5572 2.45706   1
   5 -11   5 23.9003 3.35553   1
  -5 -11  -5 30.5035 3.71550   2
  -5 -11  -5 25.6736 3.43015   1
   5 -11  -5 30.3425 3.86397   1
  -5 -11   5 20.2137 3.23840   1
  -6 -11  -5 2.97131 1.73619   1
  -6 -11  -5 -2.2281 1.31960   2
   6 -11   5 -1.1497 1.45043   1
  -6 -11   5 -0.8086 1.43739   1
  -6  11  -5 0.50501 1.70878   3
   6 -11  -5 0.52912 1.59070   1
   7 -11   5 11.4530 2.76198   1
  -7 -11  -5 4.04586 2.19027   2
  -7 -11   5 9.07934 2.59561   1
  -7  11  -5 6.14785 2.35634   3
   7 -11  -5 5.29616 2.31175   1
  -8 -11  -5 -1.1973 1.77213   2
   8 -11  -5 0.04486 1.78238   1
  -8  11  -5 1.94637 1.79357   3
  -8 -11   5 0.64582 1.62643   1
   0 -12   5 0.82482 1.38467   1
   0 -12  -5 -0.7590 1.36620   1
   1 -12   5 8.05548 2.15927   1
  -1 -12  -5 6.47652 2.14837   1
  -1 -12   5 4.83417 1.97330   1
   1 -12  -5 9.36433 2.34412   1
  -2 -12  -5 6.10338 2.09276   1
   2 -12   5 5.39897 2.08677   1
   2 -12  -5 4.30035 1.90117   1
  -2 -12   5 2.24560 1.53693   1
  -3 -12  -5 38.5638 4.38964   1
   3 -12   5 41.7791 4.39197   1
  -3 -12   5 31.6664 3.88078   1
   3 -12  -5 45.6527 4.84438   1
   4 -12   5 23.4597 3.49188   1
  -4 -12  -5 23.0608 3.42583   1
   4 -12  -5 20.7231 3.41520   1
  -4 -12   5 21.9753 3.46966   1
   5 -12   5 25.4325 3.57796   1
  -5 -12  -5 24.1748 3.48484   1
   5 -12  -5 20.9350 3.60515   1
  -5 -12   5 19.1903 3.35265   1
  -6 -12  -5 16.8485 3.04392   1
  -6 -12  -5 16.9488 3.17025   2
   6 -12   5 12.3473 2.92247   1
  -6 -12   5 9.66219 2.58483   1
   6 -12  -5 15.8280 3.30823   1
  -7 -12  -5 4.67007 2.29487   2
   7 -12   5 1.10297 1.84853   1
   0 -13   5 12.6310 2.75391   1
   0 -13  -5 13.0392 2.90962   1
  -1 -13  -5 3.26934 1.84084   1
   1 -13   5 4.79608 1.92353   1
  -1 -13   5 0.62866 1.63899   1
   1 -13  -5 0.48351 1.61800   1
  -2 -13  -5 1.00923 1.84129   1
   2 -13   5 3.66022 1.93769   1
  -2 -13   5 0.40299 1.45874   1
   2 -13  -5 -0.9280 1.49739   1
  -3 -13  -5 12.0673 2.80375   1
   3 -13   5 12.0899 2.73796   1
   3 -13  -5 12.0655 2.84379   1
  -3 -13   5 11.3598 2.73228   1
  -4 -13  -5 15.0269 3.03942   1
   4 -13   5 21.6849 3.60003   1
  -4 -13   5 16.9165 3.18731   1
   4 -13  -5 15.7773 3.32343   1
   5 -13   5 2.21610 1.95194   1
  -5 -13  -5 3.60697 2.10425   1
   0 -14  -5 0.33611 1.58153   1
  -1 -14  -5 2.74891 2.04432   1
  -2 -14  -5 -0.0807 1.68936   1
  -3 -14  -5 5.55853 2.24412   1
   0   0  -6 2188.10 36.6166   1
   0   0  -6 2138.89 35.4229   2
   1   0   6 561.002 9.83041   1
   1   0  -6 565.223 10.9746   1
  -1   0  -6 569.821 10.4039   2
   2   0  -6 153.563 4.40323   1
  -2   0  -6 154.324 3.92463   2
   2   0  -6 152.288 3.88893   2
  -3   0  -6 33.4929 1.82129   2
   3   0  -6 32.7956 2.09997   1
  -4   0  -6 131.140 4.10467   2
   4   0  -6 135.738 4.84835   1
   4   0   6 142.359 3.24343   1
   5   0  -6 69.9648 3.59172   1
   5   0   6 71.6297 2.42344   1
  -5   0  -6 72.9670 3.14403   2
   6   0  -6 41.6885 2.98507   1
   6   0   6 40.9304 2.03267   1
  -6   0  -6 38.9458 2.53651   2
  -7   0  -6 5.08041 1.42657   2
   7   0  -6 6.19995 1.69481   1
  -8   0  -6 2.16401 1.20845   2
   8   0  -6 1.30669 1.49010   1
  -9   0  -6 16.4447 2.34369   2
   9   0  -6 12.7257 2.66975   1
 -10   0  -6 32.1263 3.33061   2
  10   0  -6 31.6622 3.89802   1
  11   0  -6 -0.0952 1.46939   1
 -12   0   6 8.47250 2.59556   1
 -13   0  -6 30.4003 4.32674   3
   0   1  -6 177.817 3.86818   3
   0  -1   6 176.047 4.12458   1
   0  -1  -6 181.583 4.10228   1
   0   1  -6 174.720 4.13685   2
   0  -1  -6 180.205 4.18899   2
  -1  -1  -6 514.883 9.78528   2
  -1  -1  -6 505.218 9.23887   1
   1   1  -6 523.672 9.76824   2
   1  -1   6 512.437 9.31076   1
   1   1  -6 536.355 8.91763   3
   1  -1  -6 528.326 10.2963   1
  -1   1  -6 519.514 9.62913   2
   1  -1  -6 518.334 9.65091   2
  -1  -1   6 518.877 10.3642   1
  -1   1  -6 524.051 9.89354   3
   2  -1   6 51.9782 1.41227   1
   2   1  -6 53.6334 2.39279   1
  -2  -1  -6 52.4226 1.25090   1
  -2  -1  -6 47.1657 2.07523   2
   2  -1  -6 51.2920 1.98018   2
   2  -1  -6 50.0452 2.41690   1
  -2   1  -6 52.3209 1.99781   2
  -3  -1  -6 116.667 3.66031   2
  -3  -1  -6 114.413 2.45997   1
  -3   1   6 119.109 2.63190   3
   3   1  -6 120.681 4.08769   1
  -3   1  -6 115.747 3.33435   2
   3  -1  -6 116.876 4.10235   1
   3  -1  -6 113.176 3.29413   2
  -4   1   6 40.6715 1.67975   3
   4  -1   6 40.9505 1.66502   1
   4   1  -6 33.5424 2.37339   1
  -4  -1  -6 42.3694 2.39488   2
  -4  -1  -6 40.6152 1.48271   1
  -4   1  -6 40.0480 2.03603   2
   4  -1  -6 36.9457 2.52562   1
  -5  -1  -6 4.22075 0.76231   1
   5   1  -6 3.93565 1.23948   1
  -5  -1  -6 2.24043 0.98106   2
   5  -1   6 5.28058 0.87892   1
  -5   1   6 4.22503 0.84274   3
  -5   1  -6 3.86716 0.94307   2
   5  -1  -6 7.28582 1.56393   1
  -6  -1  -6 3.85370 1.20145   2
   6   1  -6 1.39192 1.15510   1
   6  -1   6 3.13062 0.89779   1
  -6  -1  -6 4.45736 0.93288   1
  -6   1   6 2.07771 0.82132   3
   6  -1  -6 4.52243 1.42927   1
  -6   1  -6 3.79434 1.05807   2
  -7  -1  -6 81.3858 4.08958   2
  -7   1   6 86.6482 3.56066   3
   7   1  -6 87.9364 4.57977   1
   7  -1  -6 89.6761 4.74318   1
  -7   1  -6 90.7277 3.90377   2
   8   1  -6 79.5417 4.62301   1
  -8  -1  -6 90.0494 4.42401   2
  -8   1  -6 82.5630 4.06690   2
   8  -1  -6 76.2368 4.70646   1
  -9  -1  -6 20.6571 2.74847   2
  -9   1  -6 20.0879 2.46936   2
   9  -1  -6 25.1104 3.32090   1
 -10  -1  -6 17.0515 2.71499   2
 -10   1  -6 13.3887 2.62910   3
 -10  -1   6 20.9417 3.25025   1
  10  -1  -6 21.0960 3.36145   1
 -11  -1  -6 -0.1519 1.41372   2
 -11  -1   6 1.18487 1.74468   1
 -11   1  -6 0.69356 1.64783   3
  11  -1  -6 2.51444 1.81772   1
 -12  -1   6 12.5830 3.11140   1
  12  -1  -6 24.3487 3.93333   1
 -12   1  -6 20.4598 3.61447   3
 -13   1  -6 11.8337 3.01895   3
   0   2  -6 1604.92 26.8328   3
   0  -2  -6 1587.61 27.7883   1
   0  -2   6 1610.09 27.8544   1
   0   2  -6 1601.65 26.6693   2
   0  -2  -6 1598.66 26.7187   2
   1  -2   6 2336.44 39.1582   1
  -1  -2  -6 2304.32 38.0581   2
  -1  -2  -6 2296.85 39.0053   1
   1   2  -6 2297.62 37.9967   2
  -1   2  -6 2324.81 38.5720   3
  -1   2  -6 2352.30 37.6824   2
   1  -2  -6 2302.01 37.7199   2
  -1  -2   6 2327.88 39.9380   1
   1  -2  -6 2232.54 39.7765   1
   2  -2   6 62.2585 1.97516   1
  -2  -2  -6 54.0708 2.40679   2
  -2  -2  -6 61.0732 1.84158   1
  -2   2  -6 60.7036 2.56190   3
  -2  -2   6 63.4532 2.73421   1
   2  -2  -6 61.6876 2.71715   1
   2  -2  -6 60.7062 2.14817   2
  -2   2  -6 63.0953 2.13806   2
  -3  -2  -6 406.734 8.89820   2
   3  -2   6 413.033 8.05029   1
  -3   2   6 412.614 7.65265   3
  -3  -2  -6 410.576 7.77772   1
  -3   2  -6 410.402 9.19320   3
  -3   2  -6 417.008 8.03637   2
  -3  -2   6 411.941 9.57555   1
   3  -2  -6 400.964 7.98499   2
   3  -2  -6 406.549 9.55446   1
  -4  -2  -6 64.1611 2.05318   1
  -4  -2  -6 61.1740 2.90863   2
  -4   2   6 57.1721 2.11849   3
   4  -2   6 51.7178 2.14768   1
  -4   2  -6 56.0537 3.00578   3
  -4  -2   6 59.5462 3.20471   1
   4  -2  -6 52.8776 3.00611   1
  -4   2  -6 54.7005 2.21687   2
   5  -2   6 13.7591 1.41908   1
  -5  -2  -6 16.3308 1.95208   2
  -5   2   6 14.3488 1.39182   3
  -5  -2  -6 15.6696 1.33577   1
   5  -2  -6 13.5024 1.99430   1
  -5   2  -6 13.1065 1.91074   3
  -5  -2   6 12.9832 1.97382   1
  -5   2  -6 11.1693 1.31310   2
  -6  -2  -6 80.4390 3.94174   2
   6  -2   6 83.5963 3.27766   1
  -6  -2  -6 78.3666 2.97020   1
  -6   2   6 85.1873 3.21461   3
  -6   2  -6 83.0815 4.23664   3
  -6  -2   6 79.9587 4.25044   1
   6  -2  -6 90.2343 4.49607   1
  -6   2  -6 91.3676 3.34116   2
  -7   2   6 7.01880 1.35689   3
  -7  -2  -6 7.17596 1.66304   2
  -7  -2   6 4.69935 1.55065   1
  -7   2  -6 9.31741 1.92057   3
  -7   2  -6 6.28015 1.29988   2
   7  -2  -6 3.65321 1.35987   1
  -8  -2  -6 -0.6632 1.17548   2
   8  -2  -6 0.48278 1.31998   1
  -8   2  -6 0.18969 1.12260   3
  -8   2  -6 1.31573 1.03873   2
  -8  -2   6 2.20378 1.52945   1
  -9  -2  -6 40.0689 3.76952   2
  -9  -2   6 41.4097 4.23110   1
  -9   2  -6 40.2250 4.08661   3
   9  -2  -6 36.8023 4.13335   1
 -10  -2  -6 29.0320 3.41892   2
 -10   2  -6 20.1700 3.18242   3
  10  -2  -6 29.2920 3.81904   1
 -10  -2   6 30.1569 3.77051   1
 -11  -2  -6 1.53054 1.75431   2
 -11  -2   6 3.07660 1.98792   1
  11  -2  -6 5.06028 2.13259   1
 -11   2  -6 2.61262 1.81562   3
 -12  -2  -6 32.6400 3.97483   2
  12  -2  -6 34.9724 4.53422   1
 -12  -2   6 19.9066 3.61668   1
 -12   2  -6 36.7955 4.55508   3
   0   3  -6 101.159 2.95674   2
   0  -3  -6 99.3775 3.01400   2
   0  -3  -6 104.417 3.22720   1
   0  -3   6 104.148 3.26469   1
   0   3  -6 104.990 3.13486   3
   1   3  -6 150.209 4.06444   2
  -1  -3  -6 159.110 4.20740   2
   1  -3   6 154.037 4.07217   1
  -1  -3  -6 159.633 4.03279   1
   1  -3  -6 156.424 4.47522   1
  -1   3  -6 151.018 4.25093   3
  -1  -3   6 148.187 4.38709   1
   1  -3  -6 151.990 3.79923   2
  -1   3  -6 157.991 3.77409   2
   2  -3   6 14.5346 1.29215   1
  -2  -3  -6 14.1060 1.11017   1
  -2  -3  -6 13.2868 1.43715   2
  -2   3  -6 15.3647 1.56019   3
  -2   3  -6 15.7426 1.18206   2
  -2  -3   6 14.9037 1.60977   1
   2  -3  -6 11.5985 1.46428   1
   2  -3  -6 14.7719 1.19098   2
  -3  -3  -6 234.742 5.32619   1
   3  -3   6 237.740 5.58946   1
  -3   3   6 235.130 5.16985   3
  -3  -3  -6 230.121 6.20222   2
  -3   3  -6 229.527 6.34130   3
  -3  -3   6 236.609 6.58146   1
   3  -3  -6 235.642 6.66376   1
  -3   3  -6 232.231 5.09169   2
   3  -3  -6 235.643 5.11209   2
   4  -3   6 31.7200 1.86130   1
  -4   3   6 35.4892 1.78974   3
  -4  -3  -6 35.3073 1.74328   1
  -4  -3  -6 36.1160 2.40348   2
  -4   3  -6 35.1968 1.70550   2
  -4  -3   6 35.2550 2.51429   1
  -4   3  -6 32.7691 2.46806   3
   4  -3  -6 34.9502 2.60494   1
   5  -3   6 53.7929 2.54892   1
  -5  -3  -6 53.8114 3.16937   2
  -5  -3  -6 52.8760 2.28160   1
  -5   3   6 53.9815 2.41961   3
   5  -3  -6 61.6139 3.47057   1
  -5  -3   6 58.9985 3.40960   1
  -5   3  -6 54.8027 2.24651   2
  -5   3  -6 54.1980 3.18689   3
  -6  -3  -6 9.82529 1.82070   2
  -6  -3  -6 9.99319 1.28726   1
  -6   3   6 11.2899 1.47882   3
   6  -3   6 9.56383 1.45969   1
  -6   3  -6 6.35104 1.52701   3
  -6   3  -6 10.2197 1.30315   2
  -6  -3   6 7.33351 1.64605   1
   6  -3  -6 12.8314 2.09104   1
  -7  -3  -6 32.9056 3.21708   2
  -7   3   6 32.9956 2.36291   3
   7  -3  -6 28.1487 3.19848   1
  -7   3  -6 31.4706 3.22809   3
  -7  -3   6 28.8795 3.28789   1
  -8  -3  -6 64.9321 4.05938   2
  -8   3  -6 64.6454 4.16291   3
   8  -3  -6 63.7713 4.32677   1
  -8  -3   6 62.4440 4.21751   1
  -9  -3  -6 2.44423 1.61936   2
  -9  -3   6 1.13604 1.45915   1
   9  -3  -6 1.64774 1.47402   1
  -9   3  -6 0.98759 1.29149   3
 -10  -3  -6 17.4367 2.88418   2
 -10   3  -6 15.6052 2.82562   3
 -10  -3   6 16.4829 2.96831   1
  10  -3  -6 19.9417 3.34960   1
 -11  -3  -6 1.74772 1.89616   2
 -11  -3   6 1.13097 1.66644   1
  11  -3  -6 0.59580 1.76720   1
 -11   3  -6 1.86611 1.78253   3
 -12  -3  -6 9.71191 2.54974   2
 -12  -3   6 10.8149 2.79952   1
 -12   3  -6 8.65228 2.54896   3
  12  -3  -6 4.97452 2.41759   1
   0  -4   6 140.289 4.34632   1
   0  -4  -6 146.099 4.37761   1
   0   4  -6 147.669 4.15286   3
   0  -4  -6 146.981 3.93444   2
  -1  -4  -6 161.158 4.40945   1
  -1  -4  -6 150.639 4.25784   2
   1  -4   6 153.984 4.46062   1
   1  -4  -6 145.628 4.61134   1
  -1   4  -6 154.494 3.79966   2
  -1   4  -6 156.877 4.51540   3
  -1  -4   6 155.137 4.70865   1
   1  -4  -6 146.204 3.82695   2
  -2  -4  -6 319.274 7.52340   2
   2  -4   6 320.979 7.33049   1
  -2  -4  -6 307.957 7.09569   1
   2  -4  -6 323.351 8.03036   1
  -2   4  -6 316.081 7.67381   3
  -2   4  -6 319.305 6.33960   2
   2  -4  -6 313.980 6.43986   2
  -2  -4   6 314.736 7.89969   1
  -3  -4  -6 68.8429 3.23103   2
   3  -4   6 71.9300 2.87545   1
  -3  -4  -6 72.2990 2.78132   1
  -3  -4   6 75.9032 3.45876   1
  -3   4  -6 71.9554 3.29347   3
   3  -4  -6 71.8569 3.41127   1
   3  -4  -6 72.8923 2.28895   2
  -3   4  -6 67.4346 2.24662   2
   4  -4   6 250.076 6.30803   1
  -4  -4  -6 241.588 5.97358   1
  -4   4   6 244.840 5.87996   3
  -4  -4  -6 220.320 6.69298   2
  -4   4  -6 242.483 5.21117   2
   4  -4  -6 246.022 7.49199   1
  -4  -4   6 241.095 7.13564   1
  -4   4  -6 244.821 7.00326   3
   4  -4  -6 231.873 5.19224   2
  -5   4   6 12.6182 1.51208   3
  -5  -4  -6 10.9491 1.85242   2
   5  -4   6 19.6620 1.91669   1
  -5  -4  -6 19.8066 1.76834   1
  -5   4  -6 18.0765 2.25859   3
  -5  -4   6 19.4436 2.43017   1
   5  -4  -6 17.1919 2.34778   1
  -5   4  -6 15.9718 1.33872   2
  -6   4   6 45.1372 2.57575   3
  -6  -4  -6 49.6075 2.55496   1
  -6  -4  -6 49.4620 3.23909   2
  -6  -4   6 48.2744 3.34114   1
   6  -4  -6 42.4023 3.23235   1
  -6   4  -6 38.9276 2.99146   3
  -7  -4  -6 40.6455 3.64191   2
  -7   4   6 41.6866 2.73427   3
   7  -4  -6 45.7210 3.56964   1
  -7  -4   6 42.2352 3.34592   1
  -7   4  -6 40.2518 3.69196   3
  -8  -4  -6 180.658 7.05902   2
  -8  -4   6 193.188 7.48166   1
  -8   4  -6 170.124 6.99111   3
   8  -4  -6 175.293 7.45921   1
  -9  -4  -6 6.41960 2.06372   2
  -9  -4   6 3.67425 1.72943   1
  -9   4  -6 3.51775 1.71512   3
   9  -4  -6 3.64747 1.93941   1
 -10  -4  -6 4.16095 2.05595   2
 -10   4  -6 7.03759 2.30449   3
  10  -4  -6 3.75347 2.08925   1
 -10  -4   6 5.84378 2.10409   1
 -11  -4  -6 29.1262 3.93469   2
  11  -4  -6 27.2847 4.11950   1
 -11   4  -6 25.0860 3.66523   3
 -11  -4   6 24.3029 3.74671   1
 -12  -4  -6 41.1637 4.74992   2
  12  -4  -6 36.0199 4.85361   1
 -12   4  -6 30.5597 4.22483   3
 -12  -4   6 27.7789 4.03188   1
   0   5  -6 96.3303 3.54268   3
   0  -5  -6 97.0637 3.19688   2
   0  -5  -6 93.1476 3.66543   1
   0  -5   6 94.4327 3.67238   1
   1  -5   6 205.528 5.78578   1
  -1  -5  -6 202.866 5.40164   2
  -1  -5  -6 200.804 5.64234   1
  -1   5  -6 208.263 5.74026   3
   1  -5  -6 208.991 4.85844   2
  -1  -5   6 191.051 5.84661   1
   1  -5  -6 211.790 6.05982   1
  -2  -5  -6 252.105 6.49892   2
   2  -5   6 242.786 6.41200   1
  -2  -5  -6 255.388 6.37401   1
   2  -5  -6 234.893 5.25483   2
  -2  -5   6 240.818 6.87742   1
  -2   5  -6 238.740 5.17960   2
  -2   5  -6 242.759 6.62592   3
   2  -5  -6 244.783 7.00019   1
  -3  -5  -6 48.2780 2.45006   1
  -3  -5  -6 42.6780 2.61574   2
   3  -5   6 44.1817 2.41267   1
  -3   5  -6 43.6360 2.69148   3
  -3  -5   6 45.7452 2.78879   1
   3  -5  -6 46.9494 2.92655   1
   3  -5  -6 44.9191 1.73253   2
  -3   5  -6 43.7425 1.69340   2
  -4  -5  -6 107.198 3.84120   1
  -4   5   6 106.544 3.70271   3
  -4  -5  -6 107.604 4.44808   2
   4  -5   6 108.280 4.08038   1
  -4   5  -6 114.053 4.58660   3
  -4  -5   6 111.165 4.62864   1
   4  -5  -6 112.552 4.80795   1
   5  -5   6 128.250 4.69209   1
  -5   5   6 135.756 4.46595   3
  -5  -5  -6 124.427 5.11750   2
  -5  -5  -6 126.043 4.38722   1
  -5   5  -6 133.650 5.29146   3
   5  -5  -6 133.964 5.64513   1
  -5  -5   6 128.929 5.32479   1
  -6  -5  -6 12.4961 2.10217   2
   6  -5   6 14.1272 1.96717   1
  -6  -5  -6 16.9458 1.92536   1
  -6   5   6 14.5290 1.85664   3
   6  -5  -6 13.6293 2.40568   1
  -6   5  -6 16.0262 2.39681   3
  -6  -5   6 13.1124 2.22881   1
  -7   5   6 68.7252 3.52299   3
  -7  -5  -6 70.3688 4.32846   2
  -7  -5   6 69.9162 4.25287   1
   7  -5  -6 72.1773 4.56115   1
  -7   5  -6 66.1861 4.14809   3
  -8  -5  -6 33.7725 3.74321   2
  -8   5  -6 36.7520 3.87808   3
   8  -5  -6 32.5783 3.88254   1
  -8  -5   6 31.4832 3.55574   1
  -9  -5  -6 36.2416 3.99759   2
   9  -5  -6 40.8093 4.53671   1
  -9   5  -6 39.2842 4.09760   3
  -9  -5   6 34.3613 3.93295   1
 -10  -5  -6 31.9876 3.95268   2
  10  -5  -6 37.2721 4.50045   1
 -10   5  -6 34.2107 4.00548   3
 -10  -5   6 46.8370 4.65849   1
 -11  -5  -6 10.5271 2.82792   2
 -11   5  -6 5.18415 2.07050   3
  11  -5  -6 3.82723 2.24652   1
 -11  -5   6 8.05710 2.53865   1
 -12  -5   6 3.90912 2.21167   1
 -12   5  -6 2.42137 1.98860   3
  12  -5  -6 1.31622 2.17283   1
   0  -6   6 15.4218 1.87206   1
   0  -6  -6 14.4040 1.81168   1
   0  -6  -6 17.0273 1.60591   2
  -1  -6  -6 41.8072 2.51673   1
   1  -6   6 44.7273 2.61455   1
  -1  -6  -6 42.6805 2.35464   2
   1  -6  -6 38.6737 2.58672   1
  -1   6  -6 39.3066 2.45108   3
   1  -6  -6 39.5526 1.90741   2
  -1  -6   6 39.4551 2.60505   1
  -2  -6  -6 163.721 5.19582   1
   2  -6   6 170.735 5.41870   1
  -2  -6  -6 165.724 5.22121   2
   2  -6  -6 171.404 5.82104   1
  -2  -6   6 164.401 5.68195   1
  -2   6  -6 168.378 5.48647   3
   2  -6  -6 160.275 4.03246   2
  -3  -6  -6 86.5931 3.83922   2
   3  -6   6 85.1955 3.70587   1
  -3  -6  -6 82.4605 3.56897   1
  -3   6  -6 81.9134 3.83119   3
   3  -6  -6 81.2328 4.06442   1
  -3  -6   6 80.5309 3.96874   1
  -4  -6  -6 168.084 5.36123   1
   4  -6   6 163.298 5.51359   1
  -4  -6  -6 159.323 5.75699   2
  -4  -6   6 162.274 5.97560   1
   4  -6  -6 164.807 6.25730   1
  -4   6  -6 150.130 5.63365   3
  -5  -6  -6 5.31022 1.29736   1
   5  -6   6 5.09511 1.38843   1
  -5  -6  -6 4.45746 1.52720   2
  -5   6   6 3.67748 1.21779   3
  -5  -6   6 4.85070 1.52003   1
  -5   6  -6 3.08369 1.36673   3
   5  -6  -6 5.30350 1.55197   1
  -6   6   6 20.7511 2.30193   3
  -6  -6  -6 24.9115 2.49172   1
  -6  -6  -6 21.1528 2.70539   2
   6  -6   6 28.2546 2.83586   1
   6  -6  -6 21.8773 3.07454   1
  -6   6  -6 18.5786 2.58315   3
  -6  -6   6 24.9507 3.03926   1
  -7   6   6 30.3480 2.87131   3
  -7  -6  -6 31.4464 3.41539   2
  -7   6  -6 31.4036 3.37284   3
   7  -6  -6 28.2835 3.59351   1
  -7  -6   6 31.8211 3.44872   1
  -8  -6  -6 5.51087 2.00477   2
   8  -6  -6 4.91622 1.96640   1
  -8  -6   6 9.60091 2.27349   1
  -8   6  -6 8.76411 2.13628   3
  -9  -6  -6 5.73663 2.04071   2
   9  -6  -6 8.61461 2.46323   1
  -9  -6   6 6.15723 2.12070   1
  -9   6  -6 8.11585 2.31979   3
 -10  -6  -6 20.0920 3.34885   2
  10  -6  -6 18.0252 3.31581   1
 -10  -6   6 20.7050 3.33767   1
 -10   6  -6 21.5212 3.42212   3
 -11  -6  -6 5.80163 2.31596   2
  11  -6  -6 9.12310 2.87051   1
 -11  -6   6 10.5239 2.84874   1
 -11   6  -6 7.22476 2.53825   3
 -12  -6   6 18.6446 3.46328   1
   0  -7   6 17.5590 2.17756   1
   0  -7  -6 18.5660 1.77923   2
   0  -7  -6 20.8075 2.30025   1
  -1  -7  -6 8.98894 1.63675   1
  -1  -7  -6 9.60854 1.44578   2
   1  -7   6 8.90107 1.61440   1
   1  -7  -6 11.7687 1.88769   1
  -1  -7   6 9.53274 1.65396   1
   1  -7  -6 8.65259 1.18528   2
   2  -7   6 33.0358 2.49426   1
  -2  -7  -6 31.0699 2.28507   2
  -2  -7  -6 36.5285 2.64088   1
   2  -7  -6 32.7497 2.65911   1
  -2   7  -6 32.9379 2.51999   3
  -2  -7   6 35.5020 3.19829   1
   3  -7   6 40.9347 2.83121   1
  -3  -7  -6 38.6697 2.73491   2
  -3  -7  -6 39.1318 2.76383   1
   3  -7  -6 42.3103 3.21078   1
  -3  -7   6 33.7009 3.15403   1
  -3   7  -6 43.0152 3.01951   3
  -4  -7  -6 103.018 4.27204   1
  -4  -7  -6 102.545 4.74342   2
   4  -7   6 99.1541 4.45002   1
   4  -7  -6 92.5137 4.77260   1
  -4   7  -6 93.2592 4.55093   3
  -4  -7   6 94.4593 4.66801   1
  -5  -7  -6 223.075 7.67510   2
  -5  -7  -6 216.090 6.94977   1
   5  -7   6 231.569 7.37095   1
   5  -7  -6 241.441 8.32123   1
  -5   7  -6 229.615 7.68756   3
  -5  -7   6 231.415 7.92459   1
  -6  -7  -6 14.5911 2.53070   2
  -6  -7  -6 19.9285 2.41070   1
   6  -7   6 16.0643 2.36588   1
  -6   7   6 13.9968 2.03638   3
  -6  -7   6 15.9042 2.52783   1
  -6   7  -6 13.1755 2.28117   3
   6  -7  -6 11.5489 2.43149   1
  -7  -7  -6 74.5471 4.65262   2
  -7   7   6 82.8616 4.24184   3
   7  -7  -6 71.6259 4.94287   1
  -7  -7   6 84.5723 4.92882   1
  -7   7  -6 81.7844 4.83231   3
  -8  -7  -6 27.9203 3.55872   2
   8  -7  -6 29.8365 3.88253   1
  -8  -7   6 33.0499 3.74061   1
  -8   7  -6 22.2029 3.21192   3
  -9  -7  -6 12.0189 2.54074   2
   9  -7  -6 12.5263 2.89179   1
  -9  -7   6 9.47779 2.41341   1
  -9   7  -6 2.80945 1.79197   3
 -10  -7  -6 4.73438 2.13874   2
  10  -7  -6 5.48784 2.36754   1
 -10  -7   6 4.83554 2.10461   1
 -10   7  -6 3.42064 2.00412   3
 -11  -7   6 18.6927 3.34830   1
 -11   7  -6 21.4622 3.46802   3
  11  -7  -6 34.0182 4.93227   1
   0  -8  -6 97.8265 4.55240   1
   0  -8   6 91.1047 4.45716   1
   0  -8  -6 98.4118 3.64977   2
  -1  -8  -6 25.6006 2.35226   2
  -1  -8  -6 25.7544 2.68248   1
   1  -8   6 25.4081 2.72129   1
  -1  -8   6 25.6719 2.76755   1
   1  -8  -6 25.2702 2.77103   1
  -2  -8  -6 24.2831 2.64095   1
  -2  -8  -6 19.8310 2.28678   2
   2  -8   6 19.4382 2.37512   1
  -2  -8   6 17.7504 2.45636   1
   2  -8  -6 17.1739 2.42945   1
  -2   8  -6 12.3031 2.01881   3
  -3  -8  -6 11.5616 1.94943   1
  -3  -8  -6 12.3040 2.02815   2
   3  -8   6 16.3951 2.32846   1
  -3   8  -6 12.0819 2.00982   3
  -3  -8   6 13.3325 2.26029   1
   3  -8  -6 14.0613 2.32817   1
   4  -8   6 24.0539 2.77851   1
  -4  -8  -6 23.4453 2.63648   1
  -4  -8  -6 23.4277 2.77672   2
  -4  -8   6 14.7420 2.41539   1
  -4   8  -6 22.5128 2.72741   3
   4  -8  -6 21.9703 2.92752   1
  -5  -8  -6 37.1504 2.85713   1
  -5  -8  -6 37.5457 3.75967   2
   5  -8   6 37.6768 3.51444   1
  -5   8  -6 32.1468 3.32359   3
   5  -8  -6 44.0955 4.18706   1
  -5  -8   6 34.7789 3.54929   1
  -6  -8  -6 24.5085 3.10967   2
  -6  -8  -6 28.0772 3.01425   1
   6  -8   6 26.0772 2.98313   1
  -6   8  -6 21.9522 2.96538   3
   6  -8  -6 24.5069 3.36036   1
  -6  -8   6 19.7144 2.85349   1
  -7   8   6 0.67886 1.44854   3
  -7  -8  -6 1.72415 1.50012   2
  -7  -8   6 1.95654 1.54419   1
   7  -8  -6 0.75635 1.43341   1
  -7   8  -6 1.44175 1.64078   3
  -8  -8  -6 8.09410 2.18050   2
  -8  -8   6 6.73067 2.13982   1
  -8   8  -6 6.77127 2.23728   3
   8  -8  -6 6.32594 2.24282   1
  -9  -8  -6 30.9447 4.03744   2
  -9   8  -6 27.2650 3.70371   3
  -9  -8   6 23.5588 3.58199   1
   9  -8  -6 25.0197 3.88613   1
 -10  -8  -6 10.8702 2.65633   2
 -10   8  -6 12.9654 2.80110   3
 -10  -8   6 12.5734 2.89380   1
  10  -8  -6 12.9274 3.11133   1
   0  -9   6 3.70924 1.43432   1
   0  -9  -6 1.79315 1.31177   1
   1  -9   6 19.5683 2.61496   1
  -1  -9  -6 23.8134 2.77714   1
  -1  -9   6 22.9349 2.81507   1
   1  -9  -6 23.0398 2.85744   1
   2  -9   6 47.2288 3.37934   1
  -2  -9  -6 44.8651 3.27802   1
  -2  -9  -6 49.1811 3.25037   2
   2  -9  -6 43.6242 3.47552   1
  -2  -9   6 44.8836 3.40553   1
   3  -9   6 33.8994 3.35230   1
  -3  -9  -6 29.1734 3.03258   2
  -3  -9  -6 25.4824 2.82986   1
  -3   9  -6 25.9189 2.91696   3
  -3  -9   6 30.1182 3.38736   1
   3  -9  -6 32.3420 3.50278   1
  -4  -9  -6 115.426 5.33894   1
  -4  -9  -6 125.506 5.61350   2
   4  -9   6 119.949 5.58235   1
  -4  -9   6 124.529 5.96502   1
   4  -9  -6 120.375 5.98943   1
  -5  -9  -6 16.8247 2.49408   1
   5  -9   6 16.3290 2.51527   1
  -5  -9  -6 14.0033 2.41575   2
  -5  -9   6 13.5431 2.57157   1
  -5   9  -6 11.3819 2.29167   3
   5  -9  -6 14.1110 2.64218   1
  -6  -9  -6 2.75593 1.54558   1
  -6  -9  -6 -0.1973 1.36809   2
   6  -9   6 4.37192 1.73044   1
   6  -9  -6 4.33844 1.81678   1
  -6  -9   6 5.09635 1.86494   1
  -6   9  -6 1.50590 1.64300   3
  -7  -9  -6 33.2566 3.91069   2
   7  -9  -6 30.8249 4.21697   1
  -7   9  -6 37.2787 3.95330   3
  -7  -9   6 25.0626 3.48104   1
  -8  -9  -6 2.31147 1.85371   2
  -8  -9   6 1.91952 1.86694   1
  -8   9  -6 -0.0395 1.50328   3
   8  -9  -6 3.99380 2.13343   1
  -9  -9  -6 14.4655 3.05680   2
  -9  -9   6 23.8121 3.53990   1
   9  -9  -6 15.7184 3.43600   1
  -9   9  -6 19.1295 3.26224   3
 -10  -9   6 20.3337 3.55881   1
   0 -10  -6 2.02211 1.38382   1
   0 -10   6 1.03109 1.37148   1
   1 -10   6 7.82967 1.88339   1
  -1 -10  -6 9.74923 2.14088   1
  -1 -10   6 8.96175 2.01036   1
   1 -10  -6 10.0754 2.24932   1
   2 -10   6 39.4673 3.85002   1
  -2 -10  -6 38.7961 3.73174   1
   2 -10  -6 38.1043 3.85272   1
  -2 -10   6 36.0316 3.68916   1
  -3 -10  -6 18.6913 2.73974   1
  -3 -10  -6 16.0285 2.48381   2
   3 -10   6 13.8953 2.40139   1
  -3 -10   6 19.7320 2.95322   1
   3 -10  -6 9.80220 2.37207   1
  -4 -10  -6 137.130 6.03094   1
  -4 -10  -6 123.015 5.76620   2
   4 -10   6 143.642 6.37995   1
  -4  10  -6 133.599 6.08164   3
  -4 -10   6 121.571 6.17143   1
   4 -10  -6 131.005 6.59231   1
   5 -10   6 28.8755 3.47913   1
  -5 -10  -6 28.3546 3.44943   2
  -5 -10  -6 28.0211 3.26668   1
  -5 -10   6 26.9511 3.51662   1
   5 -10  -6 30.2152 3.78004   1
  -5  10  -6 31.4003 3.55643   3
   6 -10   6 17.4441 2.91875   1
  -6 -10  -6 16.4044 2.83596   2
  -6 -10  -6 14.8361 2.64145   1
  -6 -10   6 12.3003 2.62052   1
   6 -10  -6 15.3475 2.99945   1
  -6  10  -6 13.2778 2.66377   3
  -7 -10  -6 10.3904 2.67209   2
   7 -10  -6 7.41550 2.43344   1
  -7  10  -6 10.2207 2.54315   3
  -7 -10   6 10.2869 2.71314   1
  -8 -10  -6 9.99372 2.68235   2
  -8  10  -6 8.16949 2.37067   3
   8 -10  -6 11.3002 3.06718   1
  -8 -10   6 8.02000 2.58997   1
  -9 -10   6 7.43588 2.35706   1
  -9  10  -6 7.15132 2.48339   3
   0 -11  -6 7.61350 2.07118   1
   0 -11   6 4.52150 1.74027   1
   1 -11   6 8.33051 2.17072   1
  -1 -11  -6 7.43378 2.00251   1
   1 -11  -6 4.11757 1.88592   1
  -1 -11   6 5.34920 1.87772   1
  -2 -11  -6 4.41391 1.82266   1
   2 -11   6 3.34413 1.70634   1
   2 -11  -6 0.56635 1.42341   1
  -2 -11   6 1.81776 1.48100   1
  -3 -11  -6 17.8759 2.90318   1
   3 -11   6 17.8893 2.95534   1
   3 -11  -6 12.7385 2.64618   1
  -3 -11   6 14.9671 2.78274   1
   4 -11   6 -0.4614 1.33389   1
  -4 -11  -6 4.94235 1.86094   1
  -4 -11  -6 0.47686 1.42051   2
   4 -11  -6 5.13705 1.88603   1
  -4 -11   6 1.14920 1.41635   1
   5 -11   6 7.81841 2.17278   1
  -5 -11  -6 9.26534 2.31768   2
  -5 -11  -6 10.1786 2.30632   1
  -5 -11   6 9.47759 2.46574   1
   5 -11  -6 7.15587 2.29060   1
  -5  11  -6 6.22919 2.15253   3
  -6 -11  -6 15.6845 3.01241   2
   6 -11   6 19.4148 3.19724   1
  -6 -11   6 10.9336 2.63602   1
  -6  11  -6 12.1322 2.64606   3
   6 -11  -6 10.6491 2.78789   1
  -7 -11  -6 -1.2476 1.58264   2
  -7 -11   6 0.84166 1.63391   1
   7 -11  -6 1.29668 1.87810   1
  -7  11  -6 1.71191 1.84033   3
  -8 -11  -6 7.90072 2.66837   2
  -8 -11   6 9.38146 2.50864   1
   0 -12  -6 1.04859 1.56694   1
   0 -12   6 1.61201 1.51382   1
   1 -12   6 6.48450 2.02315   1
  -1 -12  -6 3.45665 1.84103   1
  -1 -12   6 2.17137 1.66526   1
   1 -12  -6 3.76645 1.86720   1
  -2 -12  -6 4.44501 1.86333   1
   2 -12   6 1.11353 1.60443   1
  -2 -12   6 5.89515 1.99755   1
   2 -12  -6 3.47273 1.91595   1
  -3 -12  -6 43.4158 4.33481   1
   3 -12   6 43.7438 4.44438   1
   3 -12  -6 38.5750 4.39617   1
  -3 -12   6 36.1678 4.16305   1
   4 -12   6 11.1778 2.53711   1
  -4 -12  -6 7.82512 2.22733   1
   4 -12  -6 5.55440 2.29005   1
  -4 -12   6 11.3298 2.71347   1
   5 -12   6 8.70827 2.39161   1
  -5 -12  -6 5.23926 2.03391   1
   5 -12  -6 9.67944 2.62403   1
  -5 -12   6 7.99769 2.40156   1
   6 -12   6 1.69764 1.66947   1
  -6 -12  -6 3.43456 2.05386   2
  -6 -12   6 5.35941 2.19089   1
   6 -12  -6 -0.0497 1.76950   1
  -7 -12  -6 9.65008 2.62073   2
   0 -13   6 -0.4310 1.33984   1
   0 -13  -6 -0.6764 1.46318   1
   1 -13   6 3.29529 1.80923   1
  -1 -13  -6 3.79764 1.96168   1
   1 -13  -6 2.45928 1.97946   1
  -1 -13   6 3.09224 1.79824   1
   2 -13   6 25.6839 3.63426   1
  -2 -13  -6 19.0308 3.21104   1
   2 -13  -6 20.8736 3.55671   1
  -2 -13   6 14.9369 2.93352   1
   3 -13   6 2.18836 1.80130   1
  -3 -13  -6 1.44273 1.58745   1
   3 -13  -6 0.94480 1.57553   1
  -3 -13   6 -0.8876 1.68178   1
   4 -13   6 7.57474 2.48397   1
  -4 -13  -6 6.56526 2.29398   1
   4 -13  -6 8.42493 2.49468   1
  -4 -13   6 6.43848 2.27598   1
   5 -13   6 8.20507 2.61837   1
  -5 -13  -6 2.89496 2.01438   1
   0 -14  -6 0.42847 1.57690   1
  -1 -14  -6 6.71008 2.39135   1
  -2 -14  -6 5.68197 2.25896   1
   0   0  -7 -0.0607 0.58366   2
   0   0  -7 -0.5826 0.43791   1
   1   0  -7 -0.1526 0.24332   3
   1   0  -7 0.24729 0.57040   2
   1   0  -7 -0.0669 0.57207   1
  -1   0  -7 0.33994 0.55877   2
   2   0  -7 247.487 5.62827   2
   2   0  -7 249.638 6.27141   1
  -3   0  -7 99.5907 3.27916   2
   3   0  -7 95.1098 3.16138   2
   3   0  -7 96.8813 3.74120   1
   4   0  -7 364.486 9.28286   1
  -4   0  -7 374.690 6.89996   1
  -4   0  -7 372.515 8.20718   2
  -5   0  -7 25.0347 1.90483   2
   5   0  -7 26.8416 2.66286   1
  -6   0  -7 12.1127 1.66504   2
   6   0  -7 11.7417 2.08031   1
   7   0  -7 194.823 7.22372   1
  -7   0  -7 183.155 6.08320   2
   8   0  -7 111.375 5.61191   1
  -8   0  -7 104.079 4.70460   2
   9   0  -7 67.2444 4.69602   1
  -9   0  -7 73.5512 4.15715   2
 -10   0  -7 14.6447 2.49535   2
  10   0  -7 13.5177 2.78065   1
  11   0  -7 1.36325 1.89660   1
 -12   0   7 -0.2329 1.80603   1
 -13   0   7 9.88416 2.89150   1
   0  -1  -7 1832.38 31.4678   1
   0  -1   7 1837.65 31.5329   1
   0   1  -7 1825.25 30.3130   3
  -1  -1  -7 211.013 5.06157   2
   1   1  -7 222.156 5.11836   2
   1  -1   7 218.230 4.47179   1
  -1  -1  -7 218.459 4.45111   1
   1   1  -7 224.480 4.21196   3
  -1   1  -7 222.145 5.13275   3
   1  -1  -7 213.505 5.02194   2
  -1  -1   7 218.823 5.46670   1
  -1   1  -7 220.820 5.04748   2
   1  -1  -7 221.026 5.36836   1
  -2  -1  -7 69.6413 1.58781   1
  -2  -1  -7 77.9230 2.75244   2
   2   1  -7 73.4693 2.67730   2
   2   1  -7 74.6270 2.97486   1
   2  -1   7 71.8177 1.75333   1
  -2   1  -7 73.3634 2.53808   2
   2  -1  -7 67.8838 2.46400   2
   2  -1  -7 73.8248 2.95279   1
  -3  -1  -7 57.5010 2.53448   2
   3   1  -7 57.7256 2.86720   1
  -3   1   7 58.4408 1.49400   3
  -3  -1  -7 58.0732 1.34414   1
   3  -1   7 54.2624 1.57951   1
  -3   1  -7 60.2743 2.39786   2
   3  -1  -7 69.4378 3.13594   1
   3  -1  -7 60.5092 2.38588   2
  -4  -1  -7 318.536 6.14785   1
   4   1  -7 318.302 8.48313   1
   4  -1   7 339.588 6.55977   1
  -4  -1  -7 335.149 7.83931   2
  -4   1   7 334.312 6.39581   3
   4  -1  -7 322.483 8.58338   1
  -4   1  -7 331.458 7.33855   2
  -5  -1  -7 35.1604 1.53278   1
   5  -1   7 34.3306 1.64862   1
   5   1  -7 43.0648 2.86989   1
  -5  -1  -7 39.4412 2.52582   2
  -5   1   7 33.9662 1.72471   3
   5  -1  -7 32.3517 2.57651   1
  -5   1  -7 35.5333 2.12610   2
  -6  -1  -7 61.8182 3.31678   2
  -6   1   7 68.2711 2.75522   3
   6   1  -7 64.7983 3.80882   1
  -6  -1  -7 66.7881 2.46761   1
  -6   1  -7 76.4203 3.25049   2
   6  -1  -7 60.5041 3.72002   1
  -7  -1  -7 38.5643 2.92149   2
   7   1  -7 44.0467 3.33654   1
   7  -1  -7 44.2348 3.47161   1
  -7   1  -7 39.9629 2.65716   2
   8   1  -7 140.790 6.31696   1
  -8  -1  -7 148.809 5.81320   2
  -8   1  -7 143.057 5.31170   2
   8  -1  -7 143.650 6.47384   1
  -9  -1  -7 19.1264 2.65498   2
  -9   1  -7 19.9566 2.47527   2
   9  -1  -7 19.4220 3.00852   1
 -10  -1  -7 12.9271 2.43256   2
 -10   1  -7 16.7321 3.00092   3
  10  -1  -7 10.4064 2.59862   1
 -10  -1   7 12.3947 2.79642   1
 -11  -1  -7 16.1627 2.79069   2
 -11  -1   7 17.0737 3.36279   1
  11  -1  -7 16.1406 3.24938   1
 -11   1  -7 11.9795 2.84378   3
  12  -1  -7 8.22725 2.74729   1
 -12   1  -7 3.68562 2.04535   3
 -12  -1   7 3.19597 2.03880   1
   0   2  -7 10.2128 1.04092   3
   0  -2   7 9.08072 1.05285   1
   0   2  -7 8.83782 1.02346   2
   0  -2  -7 9.22718 1.04663   1
   0  -2  -7 11.9064 1.23084   2
  -1  -2  -7 35.1826 1.88010   2
   1   2  -7 35.9327 1.44063   3
  -1  -2  -7 36.3445 1.51374   1
   1   2  -7 33.8313 1.82134   2
   1  -2   7 32.6336 1.52239   1
   1  -2  -7 37.3413 1.96791   1
  -1   2  -7 32.1708 1.80038   3
  -1  -2   7 34.1342 1.90008   1
  -1   2  -7 35.0814 1.75236   2
   1  -2  -7 36.9312 1.79712   2
  -2  -2  -7 226.597 4.79362   1
  -2  -2  -7 228.874 5.73638   2
   2   2  -7 236.207 5.72578   2
   2  -2   7 238.087 5.00310   1
  -2  -2   7 240.961 6.25373   1
  -2   2  -7 242.248 6.01054   3
   2  -2  -7 231.393 5.28723   2
   2  -2  -7 239.056 6.25490   1
  -2   2  -7 238.596 5.29898   2
   3  -2   7 324.630 6.48085   1
  -3  -2  -7 320.004 7.51446   2
  -3   2   7 318.016 6.04416   3
  -3  -2  -7 320.656 6.17362   1
  -3   2  -7 326.661 7.84501   3
   3  -2  -7 308.972 8.03318   1
   3  -2  -7 306.461 6.67480   2
  -3   2  -7 318.305 6.75965   2
  -3  -2   7 318.883 8.12731   1
  -4  -2  -7 212.501 5.92846   2
   4  -2   7 192.187 4.70574   1
  -4  -2  -7 200.565 4.43226   1
  -4   2   7 203.873 4.50445   3
  -4  -2   7 208.452 6.51768   1
  -4   2  -7 195.147 6.04703   3
  -4   2  -7 202.587 5.04610   2
   4  -2  -7 210.445 5.13924   2
   4  -2  -7 208.405 6.44463   1
  -5  -2  -7 81.3427 3.61528   2
   5  -2   7 72.9944 2.73494   1
  -5  -2  -7 80.7688 2.51403   1
  -5   2   7 74.6902 2.62834   3
  -5  -2   7 77.7182 4.01223   1
  -5   2  -7 75.4939 3.77219   3
   5  -2  -7 80.2579 3.97919   1
  -5   2  -7 77.7387 2.98264   2
  -6  -2  -7 73.7860 2.66815   1
  -6  -2  -7 71.7424 3.64943   2
  -6   2   7 71.3694 2.83028   3
  -6   2  -7 74.7519 3.07794   2
   6  -2  -7 65.8061 3.96920   1
  -6  -2   7 69.7293 4.11395   1
  -6   2  -7 70.0445 3.87656   3
  -7  -2  -7 17.4524 2.33129   2
  -7   2  -7 12.6105 1.69482   2
  -7   2  -7 15.7094 2.52755   3
  -7  -2   7 13.4155 2.42074   1
   7  -2  -7 12.6970 2.34890   1
  -8  -2  -7 136.616 5.73385   2
  -8  -2   7 113.362 5.85258   1
   8  -2  -7 122.933 6.10500   1
  -8   2  -7 120.087 5.76362   3
  -8   2  -7 133.129 4.76169   2
  -9  -2  -7 19.7050 2.81996   2
  -9  -2   7 15.5993 2.94498   1
   9  -2  -7 9.74923 2.40749   1
  -9   2  -7 9.11725 2.24522   3
 -10  -2  -7 4.70320 1.81449   2
 -10   2  -7 7.98723 2.31882   3
 -10  -2   7 6.46618 2.22530   1
  10  -2  -7 8.81710 2.39012   1
 -11  -2  -7 44.3640 4.41031   2
 -11  -2   7 50.4002 5.14967   1
  11  -2  -7 47.3247 5.07974   1
 -11   2  -7 37.1322 4.46197   3
 -12  -2  -7 36.2580 4.29793   2
 -12   2  -7 39.2080 4.68409   3
 -12  -2   7 38.1718 4.79109   1
  12  -2  -7 33.0890 4.60508   1
   0   3  -7 2.78734 0.73649   2
   0  -3  -7 3.47044 0.81550   1
   0   3  -7 3.18617 0.73085   3
   0  -3  -7 2.84085 0.74787   2
   0  -3   7 3.70731 0.81684   1
  -1  -3  -7 53.2598 2.34752   2
  -1  -3  -7 50.8238 2.06662   1
   1  -3   7 50.5753 2.12146   1
   1   3  -7 51.7749 2.28873   2
  -1  -3   7 47.3969 2.32908   1
   1  -3  -7 44.8356 2.01325   2
   1  -3  -7 45.1412 2.29364   1
  -1   3  -7 50.8519 2.03086   2
  -1   3  -7 50.0293 2.27949   3
  -2  -3  -7 107.490 3.01826   1
   2  -3   7 105.713 3.13286   1
  -2  -3  -7 98.8350 3.47823   2
  -2  -3   7 99.3171 3.74187   1
  -2   3  -7 101.927 3.01940   2
   2  -3  -7 111.809 3.90024   1
  -2   3  -7 100.145 3.63908   3
   2  -3  -7 96.0719 2.99034   2
   3  -3   7 357.222 7.63667   1
  -3  -3  -7 353.276 8.37350   2
  -3  -3  -7 358.698 7.38022   1
   3  -3  -7 354.959 9.03137   1
  -3   3  -7 358.440 7.34474   2
  -3  -3   7 368.961 9.03535   1
   3  -3  -7 361.238 7.34702   2
  -3   3  -7 365.846 8.65903   3
   4  -3   7 11.0609 1.26629   1
  -4  -3  -7 13.9151 1.78861   2
  -4   3   7 11.9785 1.16729   3
  -4  -3  -7 14.4363 1.25189   1
  -4  -3   7 12.0878 1.84078   1
   4  -3  -7 12.3950 1.82787   1
  -4   3  -7 16.7481 2.06272   3
  -4   3  -7 14.0387 1.35129   2
   4  -3  -7 12.1560 1.23279   2
   5  -3   7 33.0190 1.95192   1
  -5  -3  -7 32.7418 1.74350   1
  -5  -3  -7 36.3624 2.56314   2
  -5   3   7 31.6936 1.76770   3
   5  -3  -7 31.9479 3.02656   1
  -5   3  -7 30.7689 1.79633   2
  -5  -3   7 29.8787 2.87956   1
  -5   3  -7 26.9744 2.66178   3
  -6   3   7 232.230 5.87467   3
  -6  -3  -7 226.692 5.65490   1
   6  -3   7 220.277 6.15848   1
  -6  -3  -7 228.594 7.18172   2
   6  -3  -7 219.223 7.69464   1
  -6  -3   7 219.412 7.55668   1
  -6   3  -7 218.563 5.67516   2
  -6   3  -7 240.166 7.56969   3
  -7  -3  -7 78.6991 4.26939   2
  -7   3  -7 73.8914 4.36546   3
   7  -3  -7 68.7936 4.36766   1
  -7  -3   7 86.5458 4.79140   1
  -8  -3  -7 35.4983 3.46395   2
   8  -3  -7 41.0529 4.18560   1
  -8   3  -7 42.0128 4.05424   3
  -8  -3   7 28.7815 3.47208   1
  -9  -3  -7 1.13261 1.31538   2
   9  -3  -7 1.83675 1.60307   1
  -9   3  -7 0.97066 1.46942   3
  -9  -3   7 -0.3529 1.22539   1
 -10  -3  -7 24.3528 3.28843   2
 -10  -3   7 28.7371 3.88162   1
  10  -3  -7 25.1062 3.77984   1
 -10   3  -7 23.2787 3.45500   3
 -11  -3  -7 46.8937 4.81541   2
 -11  -3   7 47.4142 4.99822   1
  11  -3  -7 53.4486 5.54795   1
 -11   3  -7 49.2690 5.11326   3
 -12  -3  -7 8.32334 2.42631   2
 -12   3  -7 7.66809 2.44909   3
  12  -3  -7 9.99789 2.93955   1
 -12  -3   7 5.45323 2.39941   1
   0   4  -7 208.078 5.13092   2
   0   4  -7 216.976 5.43360   3
   0  -4  -7 203.757 5.57304   1
   0  -4  -7 206.703 5.15983   2
   0  -4   7 218.720 5.71177   1
  -1  -4  -7 179.110 4.88157   1
  -1  -4  -7 179.155 4.91746   2
   1  -4   7 176.707 4.92799   1
   1  -4  -7 179.785 5.29505   1
   1  -4  -7 186.255 4.55104   2
  -1  -4   7 178.580 5.27233   1
  -1   4  -7 175.475 4.36310   2
  -1   4  -7 189.300 5.14588   3
   2  -4   7 64.1580 2.67910   1
  -2  -4  -7 63.6798 2.55487   1
  -2  -4  -7 65.7355 2.90462   2
  -2   4  -7 65.4967 2.34459   2
   2  -4  -7 63.2274 3.11793   1
   2  -4  -7 68.4152 2.44098   2
  -2   4  -7 65.5765 2.99663   3
  -2  -4   7 63.4830 3.07420   1
  -3  -4  -7 117.712 4.26615   2
  -3  -4  -7 113.462 3.56249   1
   3  -4   7 118.190 3.76549   1
  -3   4  -7 119.736 4.39405   3
  -3   4  -7 119.315 3.29643   2
   3  -4  -7 113.794 4.48550   1
   3  -4  -7 120.832 3.30266   2
  -3  -4   7 122.923 4.59940   1
   4  -4   7 133.835 4.18352   1
  -4   4   7 125.669 3.76790   3
  -4  -4  -7 121.828 4.66105   2
  -4  -4  -7 129.944 3.90772   1
  -4  -4   7 127.732 4.99294   1
   4  -4  -7 131.603 5.21896   1
   4  -4  -7 132.283 3.56154   2
  -4   4  -7 129.779 4.87766   3
  -4   4  -7 130.448 3.56520   2
  -5   4   7 82.0358 3.09551   3
  -5  -4  -7 79.2069 3.01516   1
  -5  -4  -7 79.1913 3.87465   2
   5  -4   7 84.9904 3.39633   1
  -5  -4   7 73.7930 3.97022   1
  -5   4  -7 80.5746 2.78650   2
   5  -4  -7 78.5931 4.18553   1
  -5   4  -7 82.6418 4.13288   3
  -6  -4  -7 34.8787 2.15521   1
  -6  -4  -7 30.6887 3.08308   2
  -6   4   7 40.3506 2.35628   3
  -6   4  -7 38.3931 3.44379   3
  -6  -4   7 39.6885 3.63961   1
   6  -4  -7 42.8286 3.86872   1
  -7  -4  -7 27.2995 3.07351   2
  -7  -4   7 25.1662 3.03817   1
   7  -4  -7 30.4103 3.48910   1
  -7   4  -7 31.2102 3.37815   3
  -8  -4  -7 15.9274 2.66816   2
  -8   4  -7 15.4914 2.63544   3
   8  -4  -7 17.1820 2.86222   1
  -8  -4   7 18.9173 2.92957   1
  -9  -4  -7 11.4440 2.50603   2
  -9   4  -7 5.60154 1.94397   3
  -9  -4   7 7.56704 2.11109   1
   9  -4  -7 11.8835 2.52637   1
 -10  -4  -7 31.3565 3.85256   2
 -10  -4   7 28.1265 3.76050   1
  10  -4  -7 26.0681 3.74547   1
 -10   4  -7 30.3633 3.77390   3
 -11  -4  -7 49.2189 4.89762   2
 -11  -4   7 48.9915 5.09262   1
  11  -4  -7 60.5856 5.99287   1
 -11   4  -7 47.2035 4.98557   3
 -12  -4  -7 10.8000 2.73387   2
  12  -4  -7 13.4518 3.21140   1
 -12  -4   7 10.6587 2.75106   1
 -12   4  -7 10.9666 2.81558   3
   0  -5  -7 100.921 3.79048   1
   0   5  -7 98.4154 3.60997   3
   0  -5   7 99.0486 3.80007   1
   0  -5  -7 97.0318 3.29021   2
  -1  -5  -7 42.6200 2.34250   1
  -1  -5  -7 44.6961 2.33992   2
   1  -5   7 42.4710 2.45599   1
  -1   5  -7 40.9719 2.41282   3
  -1   5  -7 43.1035 2.01378   2
  -1  -5   7 41.3990 2.52262   1
   1  -5  -7 41.0032 2.51568   1
   1  -5  -7 43.6751 2.03493   2
  -2  -5  -7 21.1259 2.02592   2
  -2  -5  -7 23.1775 1.79029   1
   2  -5   7 20.9437 1.98050   1
   2  -5  -7 26.0660 1.60634   2
   2  -5  -7 22.7073 2.31002   1
  -2  -5   7 25.1337 2.35499   1
  -2   5  -7 21.8062 2.08776   3
  -2   5  -7 21.4930 1.37639   2
   3  -5   7 60.4406 2.78675   1
  -3  -5  -7 55.6764 2.62780   1
  -3  -5  -7 58.1885 3.03067   2
   3  -5  -7 52.8687 2.06637   2
  -3   5  -7 53.7707 3.02834   3
   3  -5  -7 60.4502 3.39892   1
  -3  -5   7 49.2389 3.01002   1
  -3   5  -7 56.9471 2.08159   2
  -4  -5  -7 165.257 5.78386   2
   4  -5   7 168.251 5.28251   1
  -4  -5  -7 168.242 5.04251   1
  -4  -5   7 172.110 6.06223   1
  -4   5  -7 164.909 5.80488   3
  -4   5  -7 175.567 4.14202   2
   4  -5  -7 199.929 6.55992   1
  -5   5   7 140.583 4.51923   3
  -5  -5  -7 137.017 5.41996   2
   5  -5   7 149.253 5.01397   1
  -5  -5  -7 144.387 4.59112   1
  -5   5  -7 140.443 5.59717   3
   5  -5  -7 141.442 5.95776   1
  -5  -5   7 142.515 5.73417   1
  -6  -5  -7 12.4421 2.10937   2
  -6  -5  -7 16.3396 1.88039   1
   6  -5   7 21.6590 2.32643   1
  -6   5   7 16.9582 1.91078   3
  -6   5  -7 12.5409 2.18786   3
  -6  -5   7 13.2202 2.22031   1
   6  -5  -7 15.6044 2.52127   1
  -7  -5  -7 1.29297 1.40513   2
  -7   5  -7 2.81381 1.44847   3
   7  -5  -7 3.13055 1.64123   1
  -7  -5   7 2.98890 1.59945   1
  -8  -5  -7 7.09179 2.17547   2
  -8  -5   7 10.2719 2.25904   1
  -8   5  -7 8.61442 2.19068   3
   8  -5  -7 10.3824 2.34028   1
  -9  -5  -7 10.2571 2.28529   2
   9  -5  -7 8.13978 2.27451   1
  -9  -5   7 8.60970 2.29164   1
  -9   5  -7 14.1350 2.67322   3
 -10  -5  -7 17.8577 3.09957   2
 -10   5  -7 14.5645 2.90641   3
  10  -5  -7 20.0979 3.38354   1
 -10  -5   7 18.4292 3.15773   1
 -11  -5  -7 3.43885 1.98493   2
 -11   5  -7 6.26843 2.38416   3
 -11  -5   7 4.38457 2.25730   1
  11  -5  -7 4.32007 2.24894   1
 -12   5  -7 17.6833 3.30197   3
  12  -5  -7 17.0233 3.75865   1
 -12  -5   7 21.2614 3.66823   1
   0  -6  -7 104.024 4.13793   1
   0  -6  -7 103.986 3.53296   2
   0  -6   7 97.3626 4.09305   1
   1  -6   7 57.8108 3.04770   1
  -1  -6  -7 58.5130 2.97094   1
  -1  -6  -7 58.8772 2.79656   2
  -1  -6   7 60.1223 3.29407   1
   1  -6  -7 63.3658 3.29409   1
   1  -6  -7 55.8687 2.40297   2
  -1   6  -7 64.6580 3.11672   3
  -2  -6  -7 7.51681 1.40139   2
   2  -6   7 8.82891 1.50313   1
  -2  -6  -7 9.99588 1.52596   1
   2  -6  -7 7.15657 1.50164   1
  -2  -6   7 9.88001 1.65792   1
  -2   6  -7 7.78485 1.46729   3
   2  -6  -7 10.4427 1.15580   2
  -3  -6  -7 75.8570 3.66118   2
  -3  -6  -7 72.3380 3.30864   1
   3  -6   7 69.4734 3.31096   1
   3  -6  -7 69.9066 3.83557   1
  -3   6  -7 72.7909 3.62772   3
  -3  -6   7 76.4497 3.85264   1
  -4  -6  -7 154.795 5.04641   1
  -4  -6  -7 143.823 5.48801   2
   4  -6   7 147.162 5.21139   1
  -4  -6   7 157.064 5.91376   1
  -4   6  -7 149.054 5.60397   3
   4  -6  -7 160.126 6.15092   1
   5  -6   7 127.049 4.90790   1
  -5   6   7 126.359 4.57135   3
  -5  -6  -7 130.939 4.69786   1
  -5  -6  -7 136.919 5.53192   2
  -5   6  -7 115.440 5.26556   3
  -5  -6   7 131.618 5.59656   1
  -6  -6  -7 31.8953 2.48800   1
  -6   6   7 28.6257 2.58449   3
  -6  -6  -7 31.9235 3.28860   2
   6  -6   7 30.0158 2.93100   1
  -6   6  -7 32.4088 3.34868   3
  -6  -6   7 32.9332 3.46815   1
   6  -6  -7 30.2495 3.50996   1
  -7  -6  -7 0.47976 1.24793   2
   7  -6  -7 2.17592 1.47137   1
  -7   6  -7 3.15303 1.62906   3
  -7  -6   7 1.55549 1.47679   1
  -8  -6  -7 100.190 5.49512   2
   8  -6  -7 106.932 6.03545   1
  -8   6  -7 103.329 5.63444   3
  -8  -6   7 98.2494 5.47787   1
  -9  -6  -7 11.0980 2.45354   2
  -9   6  -7 12.3136 2.71960   3
   9  -6  -7 11.1300 2.70788   1
  -9  -6   7 13.6253 2.69380   1
 -10  -6  -7 1.90299 2.01110   2
  10  -6  -7 6.56510 2.44899   1
 -10   6  -7 3.39885 2.01586   3
 -10  -6   7 6.13970 2.20760   1
 -11  -6  -7 4.65464 2.15339   2
 -11  -6   7 2.77247 1.99185   1
  11  -6  -7 7.23781 2.61840   1
 -11   6  -7 1.62962 1.90089   3
   0  -7   7 74.5355 3.74822   1
   0  -7  -7 69.1485 3.60003   1
   0  -7  -7 72.6744 3.06176   2
  -1  -7  -7 42.7477 2.84812   1
   1  -7   7 47.8979 2.94844   1
  -1  -7  -7 41.6055 2.49451   2
  -1   7  -7 41.2494 2.71847   3
   1  -7  -7 41.9942 2.19190   2
   1  -7  -7 39.6396 2.84001   1
  -1  -7   7 44.4161 2.93154   1
  -2  -7  -7 77.5199 3.65897   2
  -2  -7  -7 82.5425 3.78339   1
   2  -7   7 78.6316 3.77025   1
  -2  -7   7 80.6542 4.09826   1
   2  -7  -7 85.1186 4.28525   1
  -2   7  -7 82.8469 3.92957   3
  -3  -7  -7 134.141 4.98786   1
  -3  -7  -7 132.341 5.08260   2
   3  -7   7 139.029 5.22159   1
   3  -7  -7 136.240 5.71734   1
  -3   7  -7 146.894 5.56524   3
  -3  -7   7 136.782 5.57171   1
  -4  -7  -7 31.4594 3.03203   2
   4  -7   7 33.3628 2.63456   1
  -4  -7  -7 31.0520 2.49966   1
  -4  -7   7 29.8530 3.20791   1
   4  -7  -7 32.4806 3.35557   1
  -4   7  -7 27.7353 2.90585   3
  -5  -7  -7 101.881 5.03650   2
   5  -7   7 107.367 4.72497   1
  -5  -7  -7 103.780 4.44952   1
  -5  -7   7 107.536 5.27947   1
   5  -7  -7 113.072 5.55643   1
  -5   7  -7 100.609 4.94878   3
  -6  -7  -7 24.7732 3.06973   2
  -6   7   7 28.0521 2.73314   3
   6  -7   7 22.0403 2.65152   1
  -6  -7  -7 20.7913 2.43840   1
  -6   7  -7 18.3664 2.66483   3
   6  -7  -7 23.8483 3.24515   1
  -6  -7   7 18.0745 2.68878   1
  -7  -7  -7 25.4989 3.23548   2
   7  -7  -7 35.4610 4.14160   1
  -7   7  -7 34.7595 3.69748   3
  -7  -7   7 31.4444 3.65254   1
  -8  -7  -7 57.3356 5.06142   2
   8  -7  -7 61.1489 4.79055   1
  -8   7  -7 58.6908 4.42565   3
  -8  -7   7 63.0863 4.58582   1
  -9  -7  -7 22.7480 3.44440   2
  -9  -7   7 17.1951 3.11863   1
   9  -7  -7 20.5160 3.53642   1
  -9   7  -7 17.4514 3.14097   3
 -10  -7  -7 4.89710 2.05732   2
 -10  -7   7 3.17167 1.97917   1
 -10   7  -7 2.55503 1.95874   3
  10  -7  -7 10.7941 3.01130   1
 -11   7  -7 1.22978 1.78614   3
 -11  -7   7 0.98886 1.85170   1
  11  -7  -7 -0.1063 2.01577   1
   0  -8  -7 73.8585 3.98110   1
   0  -8   7 71.8448 3.96785   1
   0  -8  -7 72.7459 3.18411   2
   1  -8   7 21.3219 2.48908   1
  -1  -8  -7 18.7578 2.05458   2
  -1  -8  -7 23.8869 2.63832   1
  -1  -8   7 22.8793 2.68207   1
   1  -8  -7 23.6809 2.73277   1
   2  -8   7 143.599 5.64453   1
  -2  -8  -7 142.265 5.49836   1
  -2  -8  -7 153.071 5.36751   2
  -2  -8   7 144.925 5.88695   1
   2  -8  -7 149.988 6.09124   1
  -2   8  -7 136.113 5.45440   3
   3  -8   7 120.652 5.09302   1
  -3  -8  -7 122.963 5.09493   1
  -3  -8  -7 125.641 5.12670   2
  -3  -8   7 123.358 5.56426   1
   3  -8  -7 118.894 5.55865   1
  -3   8  -7 120.285 5.22202   3
  -4  -8  -7 7.98081 1.73659   1
   4  -8   7 6.79520 1.61691   1
  -4  -8  -7 7.70620 1.86019   2
  -4   8  -7 7.38192 1.82427   3
   4  -8  -7 6.89605 1.92121   1
  -4  -8   7 6.34192 1.77358   1
  -5  -8  -7 1.74829 1.19290   1
   5  -8   7 0.13185 1.13211   1
  -5  -8  -7 0.78170 1.26246   2
  -5  -8   7 0.65106 1.25196   1
   5  -8  -7 -0.9592 1.08626   1
  -5   8  -7 0.64295 1.32685   3
   6  -8   7 2.40114 1.41795   1
  -6  -8  -7 2.95099 1.75578   2
  -6   8  -7 -0.0560 1.20110   3
  -6  -8   7 2.58542 1.46297   1
   6  -8  -7 1.60834 1.48033   1
  -7  -8  -7 37.6392 3.95673   2
  -7   8  -7 22.3590 3.08701   3
   7  -8  -7 31.9363 4.11869   1
  -7  -8   7 28.9087 3.57464   1
  -8  -8  -7 11.2190 2.54352   2
  -8   8  -7 13.7996 2.73304   3
  -8  -8   7 14.5849 2.90968   1
   8  -8  -7 17.7289 3.27483   1
  -9  -8  -7 17.1426 3.15971   2
  -9  -8   7 18.6664 3.24693   1
   9  -8  -7 18.6918 3.55688   1
  -9   8  -7 19.1664 3.26301   3
 -10  -8  -7 2.17742 1.92653   2
 -10  -8   7 1.01654 1.80775   1
  10  -8  -7 3.05653 2.18324   1
 -10   8  -7 1.99784 1.86332   3
   0  -9   7 4.57131 1.53337   1
   0  -9  -7 4.86050 1.63767   1
   1  -9   7 14.5601 2.27917   1
  -1  -9  -7 12.3007 2.17626   1
  -1  -9  -7 11.7444 1.76053   2
   1  -9  -7 13.1161 2.30258   1
  -1  -9   7 10.4748 2.11667   1
  -2  -9  -7 1.94058 1.17560   2
  -2  -9  -7 0.67097 1.22692   1
   2  -9   7 2.90130 1.39298   1
  -2  -9   7 1.16449 1.21615   1
   2  -9  -7 0.62730 1.22973   1
  -3  -9  -7 85.4104 4.40727   2
   3  -9   7 83.1750 4.48135   1
  -3  -9  -7 85.6882 4.44286   1
  -3   9  -7 82.9145 4.48145   3
   3  -9  -7 86.9559 4.98450   1
  -3  -9   7 85.3769 4.76245   1
   4  -9   7 66.5164 4.12787   1
  -4  -9  -7 61.8407 3.83921   1
  -4  -9  -7 57.6681 3.92880   2
   4  -9  -7 69.3680 4.62458   1
  -4  -9   7 59.3932 4.16526   1
  -4   9  -7 70.6393 4.27860   3
   5  -9   7 12.7302 2.26941   1
  -5  -9  -7 12.7301 2.24924   1
  -5  -9  -7 13.3112 2.42057   2
   5  -9  -7 12.9894 2.58001   1
  -5   9  -7 11.5113 2.31116   3
  -5  -9   7 12.8372 2.55939   1
   6  -9   7 4.14998 1.59712   1
  -6  -9  -7 1.74943 1.65206   2
  -6   9  -7 3.25983 1.70830   3
   6  -9  -7 4.63341 2.08031   1
  -6  -9   7 6.80359 2.04199   1
  -7  -9  -7 3.54994 1.76700   2
   7  -9  -7 6.80453 2.31258   1
  -7   9  -7 4.47995 1.90904   3
  -7  -9   7 3.94577 1.89850   1
  -8  -9  -7 11.5786 2.74398   2
  -8  -9   7 6.03638 2.23030   1
   8  -9  -7 6.21570 2.42777   1
  -8   9  -7 4.77018 2.13784   3
  -9  -9  -7 -0.9876 1.75033   2
  -9   9  -7 7.89932 2.33893   3
   9  -9  -7 10.6462 3.07718   1
  -9  -9   7 9.51750 2.70424   1
   0 -10   7 91.7874 5.01020   1
   0 -10  -7 91.0053 5.05737   1
  -1 -10  -7 50.5088 3.71338   1
   1 -10   7 51.3322 3.70474   1
  -1 -10   7 52.3658 3.95457   1
   1 -10  -7 48.5497 3.74900   1
   2 -10   7 12.6392 2.28710   1
  -2 -10  -7 9.90569 2.09726   1
   2 -10  -7 5.70546 1.89287   1
  -2 -10   7 9.59198 2.11726   1
  -3 -10  -7 98.9581 5.10283   1
  -3 -10  -7 105.697 4.99894   2
   3 -10   7 104.199 5.29037   1
   3 -10  -7 92.1449 5.46470   1
  -3 -10   7 105.333 5.66275   1
  -4 -10  -7 1.54731 1.35035   1
   4 -10   7 4.01594 1.69075   1
  -4 -10  -7 -0.5148 1.30338   2
  -4 -10   7 2.84359 1.62193   1
  -4  10  -7 0.18350 1.18618   3
   4 -10  -7 4.41882 1.89837   1
   5 -10   7 2.84765 1.51819   1
  -5 -10  -7 2.13932 1.54221   2
  -5 -10  -7 3.45129 1.70971   1
  -5  10  -7 3.63624 1.72887   3
  -5 -10   7 1.32389 1.61709   1
   5 -10  -7 3.33401 1.84234   1
  -6 -10  -7 1.34085 1.45060   2
   6 -10   7 0.93111 1.41436   1
  -6 -10   7 -0.3610 1.38134   1
   6 -10  -7 -0.1716 1.25382   1
  -6  10  -7 0.45460 1.46951   3
  -7 -10  -7 14.7882 2.79245   2
  -7 -10   7 11.2637 2.78922   1
   7 -10  -7 7.29482 2.59138   1
  -7  10  -7 6.58483 2.17842   3
  -8 -10  -7 0.87397 1.80274   2
  -8 -10   7 4.97733 2.08544   1
   8 -10  -7 2.39331 2.15729   1
  -8  10  -7 2.73759 1.97106   3
  -9 -10   7 13.9752 2.96027   1
   0 -11   7 46.7456 3.80662   1
   0 -11  -7 50.6759 4.00247   1
  -1 -11  -7 57.3084 4.20591   1
   1 -11   7 64.2698 4.49590   1
   1 -11  -7 67.4059 4.61210   1
  -1 -11   7 60.2956 4.36680   1
  -2 -11  -7 14.4640 2.65261   1
   2 -11   7 14.9028 2.63891   1
  -2 -11   7 15.1943 2.70426   1
   2 -11  -7 17.2856 2.97128   1
  -3 -11  -7 26.8379 3.37602   1
   3 -11   7 28.0503 3.45574   1
  -3 -11   7 20.2152 3.08662   1
   3 -11  -7 23.6666 3.44460   1
  -4 -11  -7 1.14732 1.52123   2
  -4 -11  -7 0.88077 1.52846   1
   4 -11   7 4.21063 1.84829   1
  -4 -11   7 0.88462 1.50243   1
   4 -11  -7 -1.6219 1.24162   1
  -5 -11  -7 2.20070 1.64854   2
  -5 -11  -7 -1.4234 1.23226   1
   5 -11   7 1.90602 1.55458   1
  -5  11  -7 -1.1451 1.35819   3
   5 -11  -7 -0.3855 1.32316   1
  -5 -11   7 1.03870 1.70844   1
  -6 -11  -7 3.19904 1.91245   2
   6 -11   7 4.00268 2.04124   1
  -6 -11   7 2.79591 2.11347   1
  -6  11  -7 3.52865 1.96447   3
   6 -11  -7 4.02709 2.07889   1
  -7 -11  -7 1.93519 1.77978   2
  -7 -11   7 0.39686 1.56097   1
  -7  11  -7 2.31895 1.87321   3
   7 -11  -7 0.42137 1.88233   1
   0 -12   7 52.1950 4.21223   1
   0 -12  -7 46.2392 4.60689   1
  -1 -12  -7 59.4912 4.56561   1
   1 -12   7 46.5923 4.54495   1
  -1 -12   7 41.1226 4.38518   1
   1 -12  -7 56.3576 5.16865   1
   2 -12   7 13.8364 2.79213   1
  -2 -12  -7 8.88925 2.67575   1
  -2 -12   7 10.6441 2.52792   1
   2 -12  -7 15.2651 2.97046   1
  -3 -12  -7 9.88049 2.33728   1
   3 -12   7 7.30897 2.30911   1
  -3 -12   7 4.85137 1.98577   1
   3 -12  -7 7.39448 2.38779   1
   4 -12   7 0.68901 1.55725   1
  -4 -12  -7 6.22999 2.11401   1
   4 -12  -7 3.87146 2.18903   1
  -4 -12   7 3.88805 1.90431   1
   5 -12   7 12.1720 2.82832   1
  -5 -12  -7 13.3189 2.62215   1
  -5 -12   7 9.46274 2.62059   1
   5 -12  -7 15.5260 3.36500   1
   6 -12   7 8.72807 2.48631   1
  -6 -12  -7 4.12533 2.18491   2
   6 -12  -7 5.92941 2.32420   1
  -6 -12   7 2.36334 1.88093   1
  -7 -12  -7 13.2361 3.06188   2
   0 -13   7 0.26475 1.62217   1
   0 -13  -7 1.26478 1.61375   1
   1 -13   7 3.86169 1.99521   1
  -1 -13  -7 4.86970 2.24026   1
   1 -13  -7 1.68040 1.71256   1
  -1 -13   7 5.33357 1.95689   1
   2 -13   7 8.58512 2.46813   1
  -2 -13  -7 10.5642 2.70335   1
   2 -13  -7 10.9704 2.78387   1
  -2 -13   7 8.67952 2.46764   1
  -3 -13  -7 7.75234 2.50319   1
   3 -13   7 12.0442 2.93054   1
   3 -13  -7 10.5037 2.74897   1
  -3 -13   7 10.2327 2.56490   1
   4 -13   7 0.29539 1.60838   1
  -4 -13  -7 5.70197 2.12947   1
  -4 -13   7 2.24606 1.95808   1
   4 -13  -7 1.00565 1.71120   1
   5 -13   7 5.11763 2.45005   1
  -1 -14  -7 9.60132 2.80234   1
  -2 -14  -7 2.41299 1.91687   1
   0   0  -8 45.6675 1.85294   1
   0   0  -8 49.4508 2.13778   2
  -1   0  -8 1.70566 0.68659   2
   1   0  -8 0.76999 0.70716   1
   1   0  -8 2.16687 0.76075   2
   1   0  -8 1.96316 0.38346   3
   2   0  -8 43.4653 2.37343   1
   2   0  -8 44.9906 2.08520   2
  -2   0  -8 44.6746 2.15693   2
   3   0  -8 58.6504 2.98077   1
   3   0  -8 62.9762 2.64016   2
  -3   0  -8 62.8403 2.60661   2
  -4   0  -8 61.7604 2.82056   2
   4   0  -8 56.0095 3.15353   1
  -5   0  -8 122.029 2.98527   1
   5   0  -8 124.793 5.06990   1
  -5   0  -8 123.881 4.28299   2
  -6   0  -8 -0.4580 0.79068   2
   6   0  -8 3.23498 1.23877   1
  -7   0  -8 328.019 8.70671   2
   7   0  -8 326.501 10.0616   1
   8   0  -8 70.6483 4.55534   1
  -8   0  -8 72.4445 3.94908   2
   9   0  -8 38.6027 4.18226   1
  -9   0  -8 39.7200 3.52974   2
  10   0  -8 0.16173 1.43690   1
 -10   0  -8 0.80453 1.37595   2
  11   0  -8 -0.2533 1.55971   1
 -12   0   8 18.7933 3.70570   1
 -13   0   8 1.46423 2.08213   1
   0   1  -8 42.9533 1.72059   3
   0  -1  -8 44.6140 1.88941   1
   0  -1  -8 43.4652 2.01923   2
   0   1  -8 41.5721 1.97966   2
   0  -1   8 43.6599 1.87664   1
   1   1  -8 328.128 7.05498   2
   1  -1   8 330.268 6.37488   1
   1   1  -8 325.299 5.96995   3
  -1  -1  -8 331.592 6.36373   1
  -1  -1  -8 327.025 7.06439   2
  -1   1  -8 325.175 6.97481   2
   1  -1  -8 318.984 6.97699   2
  -1  -1   8 322.565 7.40973   1
  -1   1  -8 318.219 6.95906   3
   1  -1  -8 325.546 7.33841   1
   2  -1   8 159.387 3.25972   1
   2   1  -8 164.802 4.79931   1
  -2  -1  -8 162.422 3.11451   1
  -2  -1  -8 163.286 4.45356   2
   2   1  -8 155.572 4.35078   2
  -2   1  -8 153.349 4.19234   2
   2  -1  -8 160.934 4.82751   1
   2  -1  -8 153.031 4.19240   2
  -3  -1  -8 414.671 8.93159   2
   3   1  -8 410.370 8.86470   2
   3   1  -8 414.816 9.69132   1
   3  -1   8 405.443 7.31787   1
   3  -1  -8 392.500 8.45681   2
  -3   1  -8 415.187 8.52376   2
   3  -1  -8 402.562 9.69063   1
   4   1  -8 0.67707 0.87308   1
   4  -1   8 0.81629 0.39715   1
  -4  -1  -8 1.94307 0.84116   2
  -4   1   8 0.39426 0.42263   3
  -4  -1  -8 0.16326 0.26773   1
  -4   1  -8 1.74287 0.75420   2
   4  -1  -8 0.53701 0.64056   2
   4  -1  -8 0.44466 0.86354   1
   5   1  -8 74.2493 3.82997   1
  -5   1   8 72.4872 2.37070   3
  -5  -1  -8 71.6304 3.31432   2
  -5  -1  -8 72.2875 2.06789   1
   5  -1   8 73.5237 2.34114   1
   5  -1  -8 70.6855 3.79549   1
  -5   1  -8 79.6706 3.19749   2
  -6   1   8 53.5626 2.33550   3
  -6  -1  -8 57.4283 3.15463   2
   6   1  -8 53.7886 3.46204   1
  -6   1  -8 58.7248 2.98327   2
   6  -1  -8 55.8341 3.58605   1
  -7  -1  -8 77.6259 3.99860   2
   7   1  -8 70.5892 4.31752   1
   7  -1  -8 74.1542 4.42547   1
  -7   1  -8 74.7552 3.55203   2
   8   1  -8 45.5668 3.66893   1
  -8  -1  -8 42.8877 3.28422   2
  -8   1  -8 44.3081 2.97719   2
   8  -1  -8 45.4028 4.29775   1
  -9  -1  -8 29.2052 3.19269   2
   9  -1  -8 33.2685 3.99726   1
  -9   1  -8 26.2482 2.78239   2
 -10  -1  -8 21.4551 2.95258   2
  10  -1  -8 18.7780 3.12698   1
 -10  -1   8 15.4501 2.96367   1
 -10   1  -8 16.6957 2.98006   3
 -11  -1  -8 7.37661 2.10910   2
  11  -1  -8 5.32291 2.22419   1
 -11   1  -8 4.68955 2.21962   3
 -11  -1   8 3.42246 2.09820   1
  12  -1  -8 5.29772 2.55244   1
 -12  -1   8 6.73810 2.65865   1
 -12   1  -8 3.86671 2.20614   3
   0   2  -8 181.744 4.65828   2
   0  -2  -8 209.050 4.84184   1
   0  -2   8 183.947 4.68052   1
   0  -2  -8 176.766 4.68669   2
   0   2  -8 180.690 4.39549   3
   1   2  -8 309.288 6.89609   2
  -1  -2  -8 313.605 6.44571   1
   1   2  -8 319.239 6.18738   3
   1  -2   8 307.007 6.50226   1
  -1  -2  -8 309.115 6.95036   2
  -1  -2   8 316.779 7.33020   1
  -1   2  -8 322.966 6.82359   2
   1  -2  -8 314.729 7.34071   1
   1  -2  -8 315.363 6.82190   2
  -1   2  -8 306.602 6.90044   3
   2  -2   8 150.618 3.48418   1
  -2  -2  -8 146.571 4.29356   2
  -2  -2  -8 146.820 3.30952   1
   2   2  -8 145.510 4.24573   2
  -2  -2   8 138.616 4.59376   1
  -2   2  -8 137.167 3.88327   2
  -2   2  -8 136.845 4.33649   3
   2  -2  -8 142.426 3.93240   2
   2  -2  -8 129.924 4.45213   1
  -3  -2  -8 135.794 4.35754   2
  -3  -2  -8 141.938 3.12671   1
   3  -2   8 140.163 3.39472   1
   3  -2  -8 135.716 4.82616   1
  -3   2  -8 131.443 4.61320   3
   3  -2  -8 139.124 3.96576   2
  -3   2  -8 141.697 4.00670   2
  -3  -2   8 134.202 4.82124   1
  -4  -2  -8 837.806 14.6811   1
  -4   2   8 832.904 14.4403   3
   4  -2   8 810.739 15.1016   1
  -4  -2  -8 833.271 16.3394   2
  -4   2  -8 841.698 15.3798   2
   4  -2  -8 816.695 17.5625   1
   4  -2  -8 828.593 15.3971   2
  -4  -2   8 837.427 17.7226   1
  -4   2  -8 857.476 17.0474   3
  -5  -2  -8 28.4969 1.39391   1
   5  -2   8 31.9421 1.68586   1
  -5   2   8 30.2807 1.58826   3
  -5  -2  -8 33.4093 2.50329   2
   5  -2  -8 31.6504 3.03876   1
  -5  -2   8 27.0539 2.87425   1
  -5   2  -8 29.2153 2.78880   3
  -5   2  -8 31.7248 2.03664   2
  -6   2   8 6.20392 1.07375   3
  -6  -2  -8 9.69565 1.68267   2
  -6  -2   8 5.32040 1.56051   1
  -6   2  -8 6.07542 1.18680   2
   6  -2  -8 9.13156 1.91707   1
  -6   2  -8 6.40783 1.61664   3
  -7  -2  -8 31.0590 3.00148   2
  -7  -2   8 34.5883 3.59932   1
   7  -2  -8 31.3797 3.38401   1
  -7   2  -8 41.3338 3.85936   3
  -7   2  -8 30.5804 2.28511   2
  -8  -2  -8 19.3501 2.59524   2
   8  -2  -8 20.0662 3.04624   1
  -8   2  -8 17.4100 2.14066   2
  -8  -2   8 20.7634 3.11247   1
  -8   2  -8 22.8823 3.05718   3
  -9  -2  -8 31.0461 3.36930   2
  -9   2  -8 36.8409 3.94064   3
   9  -2  -8 36.5294 4.01789   1
  -9  -2   8 36.3598 4.09707   1
 -10  -2  -8 1.26772 1.50428   2
  10  -2  -8 0.01284 1.60911   1
 -10  -2   8 -1.5510 1.34660   1
 -10   2  -8 -0.5651 1.44032   3
 -11  -2  -8 19.4001 3.18111   2
 -11   2  -8 23.3530 3.68830   3
 -11  -2   8 21.1731 3.48736   1
  11  -2  -8 20.4412 3.65586   1
 -12  -2  -8 13.2691 2.96218   2
 -12   2  -8 12.5754 2.96989   3
  12  -2  -8 15.8556 3.37480   1
 -12  -2   8 12.0106 2.99658   1
   0  -3  -8 64.4576 2.62319   1
   0   3  -8 65.8755 2.56427   2
   0   3  -8 64.0943 2.47745   3
   0  -3  -8 65.1838 2.61231   2
   0  -3   8 66.2420 2.63424   1
  -1  -3  -8 138.763 3.86949   1
   1   3  -8 140.921 4.15407   2
  -1  -3  -8 144.022 4.24917   2
   1  -3   8 142.260 3.99247   1
  -1   3  -8 146.839 3.94908   2
  -1  -3   8 150.464 4.54166   1
  -1   3  -8 150.884 4.33087   3
   1  -3  -8 142.584 4.40815   1
   1  -3  -8 146.634 4.01592   2
  -2  -3  -8 96.5749 3.54215   2
  -2  -3  -8 97.2436 2.89877   1
   2  -3   8 91.1825 2.95045   1
  -2   3  -8 98.5760 3.62355   3
  -2  -3   8 98.0398 3.81904   1
   2  -3  -8 92.4467 3.80743   1
   2  -3  -8 94.6971 3.13277   2
  -2   3  -8 103.513 3.16600   2
   3  -3   8 392.519 8.19916   1
  -3  -3  -8 382.596 9.03997   2
  -3  -3  -8 405.431 7.98441   1
  -3  -3   8 394.541 9.75323   1
   3  -3  -8 395.585 8.16506   2
  -3   3  -8 398.617 9.38769   3
  -3   3  -8 407.902 8.21173   2
   3  -3  -8 401.037 9.88403   1
  -4  -3  -8 97.2330 4.01767   2
  -4  -3  -8 98.4391 2.89704   1
   4  -3   8 100.730 3.19864   1
  -4   3   8 94.3598 2.83442   3
  -4   3  -8 102.788 4.23406   3
   4  -3  -8 96.6470 4.34680   1
   4  -3  -8 97.3191 3.19992   2
  -4   3  -8 93.3691 3.16580   2
  -4  -3   8 98.0469 4.33963   1
   5  -3   8 88.3257 3.15398   1
  -5   3   8 90.6333 2.93874   3
  -5  -3  -8 83.8510 2.75531   1
  -5  -3  -8 84.6719 3.96337   2
  -5   3  -8 79.1855 4.01575   3
  -5  -3   8 88.3376 4.35330   1
  -5   3  -8 85.8827 3.11851   2
   5  -3  -8 84.7356 4.29939   1
  -6  -3  -8 7.03163 1.59717   2
  -6   3   8 8.90902 1.27136   3
  -6   3  -8 7.10197 1.72794   3
   6  -3  -8 8.78119 1.87636   1
  -6  -3   8 8.06243 1.82898   1
  -6   3  -8 10.4851 1.38610   2
  -7  -3  -8 6.30359 1.61741   2
  -7   3  -8 5.61102 1.68218   3
  -7  -3   8 9.49655 2.13837   1
   7  -3  -8 6.77712 1.89351   1
  -8  -3  -8 106.728 5.27598   2
   8  -3  -8 99.5971 5.57861   1
  -8  -3   8 107.433 5.66059   1
  -8   3  -8 98.0738 5.29515   3
  -9  -3  -8 12.9975 2.45843   2
   9  -3  -8 10.7647 2.48378   1
  -9   3  -8 15.2146 2.69694   3
  -9  -3   8 16.0524 2.91990   1
 -10  -3  -8 21.9116 3.15809   2
  10  -3  -8 16.3468 3.12767   1
 -10  -3   8 22.8940 3.54256   1
 -10   3  -8 18.6394 3.09179   3
 -11  -3  -8 8.82410 2.38554   2
  11  -3  -8 11.8026 2.87636   1
 -11  -3   8 8.77169 2.68962   1
 -11   3  -8 10.2829 2.69685   3
 -12  -3  -8 11.9829 2.85077   2
  12  -3  -8 7.28389 2.65618   1
 -12  -3   8 8.00070 2.84022   1
 -12   3  -8 12.5561 2.89020   3
   0  -4   8 400.298 9.09502   1
   0  -4  -8 389.102 8.47623   2
   0  -4  -8 403.570 9.06672   1
   0   4  -8 413.358 8.76118   3
   0   4  -8 419.066 8.58584   2
  -1  -4  -8 79.9582 3.11110   2
  -1  -4  -8 75.2178 2.91254   1
   1  -4   8 78.8831 3.04666   1
   1  -4  -8 79.6431 2.83783   2
   1  -4  -8 73.9033 3.24382   1
  -1  -4   8 74.6250 3.26514   1
  -1   4  -8 75.2690 2.71618   2
  -1   4  -8 74.6692 3.05586   3
  -2  -4  -8 349.392 8.24628   2
   2  -4   8 352.635 8.01036   1
  -2  -4  -8 360.206 7.84693   1
  -2  -4   8 361.888 8.87738   1
  -2   4  -8 354.424 8.51590   3
   2  -4  -8 354.128 7.53045   2
  -2   4  -8 350.422 7.37500   2
   2  -4  -8 377.387 9.02953   1
  -3  -4  -8 168.177 4.42313   1
   3  -4   8 171.110 4.68108   1
  -3  -4  -8 157.475 5.13145   2
  -3  -4   8 153.449 5.39878   1
  -3   4  -8 159.924 5.29883   3
   3  -4  -8 151.440 5.65154   1
  -3   4  -8 158.667 4.17794   2
   3  -4  -8 166.292 4.23468   2
  -4  -4  -8 27.6118 1.68954   1
  -4  -4  -8 25.7930 2.44650   2
   4  -4   8 24.8137 1.75719   1
   4  -4  -8 24.1748 2.65564   1
  -4   4  -8 22.8603 2.39839   3
  -4  -4   8 27.2597 2.65628   1
  -4   4  -8 24.4455 1.69409   2
   4  -4  -8 25.8044 1.54483   2
  -5  -4  -8 13.1738 1.40355   1
  -5   4   8 13.0073 1.44588   3
   5  -4   8 11.1042 1.45598   1
  -5  -4  -8 13.5545 1.92362   2
   5  -4  -8 11.7662 2.03993   1
  -5  -4   8 8.59733 1.77696   1
  -5   4  -8 14.6328 2.15121   3
  -5   4  -8 12.3467 1.36388   2
  -6   4   8 31.0676 2.08070   3
  -6  -4  -8 29.8117 2.98373   2
  -6  -4   8 37.1757 3.52785   1
  -6   4  -8 26.6184 2.90921   3
   6  -4  -8 32.3632 3.42656   1
  -7  -4  -8 70.6414 4.12973   2
   7  -4  -8 65.1692 4.44962   1
  -7  -4   8 55.8827 3.99569   1
  -7   4  -8 61.3243 4.02986   3
  -8  -4  -8 39.6861 3.86084   2
  -8   4  -8 44.8067 4.17640   3
  -8  -4   8 53.7512 4.10032   1
   8  -4  -8 41.4501 4.42542   1
  -9  -4  -8 4.47768 1.86144   2
  -9   4  -8 5.88005 2.04208   3
   9  -4  -8 5.57932 2.08446   1
  -9  -4   8 2.26207 1.63522   1
 -10  -4  -8 16.4598 2.93279   2
 -10   4  -8 16.6229 2.99839   3
 -10  -4   8 20.0951 3.37036   1
  10  -4  -8 11.9965 2.82741   1
 -11  -4  -8 3.29160 2.01617   2
  11  -4  -8 4.36430 2.13700   1
 -11   4  -8 3.64415 2.03584   3
 -11  -4   8 2.71472 2.07270   1
 -12  -4  -8 7.77341 2.43012   2
 -12   4  -8 3.18307 2.13438   3
 -12  -4   8 2.72390 2.06251   1
  12  -4  -8 6.13117 2.77781   1
   0  -5   8 14.1978 1.71566   1
   0  -5  -8 15.0474 1.53317   2
   0   5  -8 13.3762 1.59482   3
   0  -5  -8 11.0030 1.54831   1
   1  -5   8 317.753 7.90343   1
  -1  -5  -8 319.624 7.79795   1
  -1  -5  -8 315.553 7.54398   2
   1  -5  -8 309.502 8.20645   1
  -1   5  -8 313.725 6.97485   2
  -1  -5   8 325.834 8.27474   1
   1  -5  -8 321.722 7.12376   2
  -1   5  -8 325.078 7.93006   3
  -2  -5  -8 27.0525 2.02471   2
   2  -5   8 27.7296 1.99781   1
  -2  -5  -8 26.6417 1.88611   1
   2  -5  -8 28.3315 1.73348   2
   2  -5  -8 23.5207 2.37706   1
  -2  -5   8 28.0484 2.58118   1
  -2   5  -8 26.8368 2.10750   3
  -2   5  -8 26.4831 1.58222   2
  -3  -5  -8 7.68910 1.44629   2
  -3  -5  -8 8.32197 1.29823   1
   3  -5   8 9.13145 1.37397   1
  -3  -5   8 12.1833 1.87391   1
  -3   5  -8 8.24364 1.49604   3
   3  -5  -8 7.99181 1.05834   2
  -3   5  -8 9.92862 1.10805   2
   3  -5  -8 7.33207 1.50767   1
  -4  -5  -8 4.67418 1.34774   2
   4  -5   8 1.78657 0.89878   1
  -4  -5  -8 2.68250 0.93715   1
  -4  -5   8 3.39151 1.22159   1
  -4   5  -8 3.48108 0.84526   2
  -4   5  -8 3.20751 1.18473   3
   4  -5  -8 2.46353 1.32315   1
  -5   5   8 13.5418 1.60159   3
  -5  -5  -8 15.1837 2.18982   2
  -5  -5  -8 14.9738 1.66246   1
   5  -5   8 12.9556 1.68394   1
   5  -5  -8 13.9249 2.34036   1
  -5   5  -8 12.6527 2.07682   3
  -5  -5   8 11.7400 2.04773   1
  -6   5   8 32.8157 2.24158   3
  -6  -5  -8 31.3753 3.15369   2
  -6   5  -8 26.7217 3.00307   3
  -6  -5   8 33.0227 3.41736   1
   6  -5  -8 29.1200 3.40610   1
  -7  -5  -8 13.6479 2.38790   2
   7  -5  -8 10.6884 2.33951   1
  -7   5  -8 13.6698 2.39793   3
  -7  -5   8 16.7750 2.67845   1
  -8  -5  -8 49.5104 3.81978   2
   8  -5  -8 42.5162 4.47589   1
  -8   5  -8 39.3007 4.06801   3
  -8  -5   8 46.1857 4.36261   1
  -9  -5  -8 18.3053 2.99605   2
   9  -5  -8 21.0923 3.45343   1
  -9   5  -8 14.4707 2.75732   3
  -9  -5   8 13.9993 2.72431   1
 -10  -5  -8 3.36494 1.93199   2
 -10  -5   8 4.65554 2.06432   1
 -10   5  -8 8.01446 2.47390   3
  10  -5  -8 4.63865 2.20148   1
 -11  -5  -8 29.5581 3.96788   2
  11  -5  -8 32.2940 4.62390   1
 -11   5  -8 30.0716 4.24045   3
 -11  -5   8 33.4752 4.42631   1
  12  -5  -8 3.04097 2.48327   1
 -12  -5   8 7.13928 2.68338   1
   0  -6  -8 18.9253 2.10354   1
   0  -6  -8 14.0032 1.57786   2
   0  -6   8 14.6046 1.87862   1
   1  -6   8 34.5223 2.45632   1
  -1  -6  -8 31.4623 2.31245   1
  -1  -6  -8 33.4903 2.21543   2
  -1   6  -8 30.7125 2.36228   3
   1  -6  -8 39.1631 2.64716   1
  -1  -6   8 31.1049 2.46948   1
   1  -6  -8 32.4175 1.97188   2
  -2  -6  -8 28.8901 2.08258   1
  -2  -6  -8 28.4394 2.14456   2
   2  -6   8 27.2670 2.18966   1
  -2   6  -8 26.9984 1.69896   2
  -2  -6   8 24.5286 2.52774   1
  -2   6  -8 28.9201 2.62044   3
   2  -6  -8 24.6372 2.57529   1
   2  -6  -8 30.4806 1.83943   2
  -3  -6  -8 23.1958 2.19273   1
   3  -6   8 24.4739 2.30482   1
  -3  -6  -8 25.5698 2.52871   2
  -3   6  -8 22.5813 2.40363   3
   3  -6  -8 23.9529 2.74957   1
  -3  -6   8 24.8872 2.71045   1
   4  -6   8 57.3088 3.12421   1
  -4  -6  -8 57.2933 2.96986   1
  -4  -6  -8 60.8946 3.49908   2
  -4  -6   8 63.1394 3.70632   1
  -4   6  -8 59.7232 3.59921   3
   4  -6  -8 57.5379 3.70726   1
  -5  -6  -8 94.5727 4.59136   2
   5  -6   8 100.469 4.21579   1
  -5  -6  -8 89.8699 3.79730   1
  -5   6  -8 91.0910 4.58962   3
  -5  -6   8 92.1875 4.77947   1
   5  -6  -8 91.3437 5.06747   1
  -6  -6  -8 8.22858 1.89932   2
  -6   6   8 8.27088 1.63212   3
  -6   6  -8 10.0445 2.01241   3
  -6  -6   8 7.68418 1.86151   1
   6  -6  -8 11.4879 2.36651   1
  -7  -6  -8 20.9946 2.89844   2
  -7   6  -8 21.8787 3.00041   3
  -7  -6   8 16.9936 2.70796   1
   7  -6  -8 25.9671 3.38026   1
  -8  -6  -8 31.0674 3.68524   2
  -8   6  -8 30.1274 3.63671   3
   8  -6  -8 29.0392 3.77997   1
  -8  -6   8 33.7052 3.92316   1
  -9  -6  -8 29.2114 3.78847   2
  -9  -6   8 24.3491 3.53759   1
   9  -6  -8 29.9088 4.19320   1
  -9   6  -8 25.8200 3.59411   3
 -10  -6  -8 1.22960 1.72885   2
 -10  -6   8 3.79416 1.91644   1
 -10   6  -8 3.14763 2.05867   3
  10  -6  -8 0.74560 1.83349   1
 -11  -6  -8 1.16133 1.69738   2
 -11  -6   8 0.91026 1.74909   1
 -11   6  -8 -0.4941 1.54004   3
  11  -6  -8 0.15805 1.92045   1
   0  -7  -8 1.99039 0.85186   2
   0  -7   8 -0.4399 0.72972   1
   0  -7  -8 -0.0279 1.00044   1
  -1  -7  -8 33.8847 2.52867   1
  -1  -7  -8 34.4463 2.34064   2
   1  -7   8 33.0707 2.52510   1
   1  -7  -8 30.1903 1.99307   2
  -1  -7   8 26.8014 2.72059   1
   1  -7  -8 30.7781 2.91327   1
  -1   7  -8 26.2018 2.53276   3
   2  -7   8 46.5422 2.95222   1
  -2  -7  -8 51.5278 3.07771   1
  -2  -7  -8 53.3143 3.04162   2
  -2  -7   8 52.9216 3.34598   1
   2  -7  -8 49.5273 3.35269   1
  -2   7  -8 54.4948 3.23408   3
   3  -7   8 39.4093 2.79785   1
  -3  -7  -8 45.3215 3.07438   2
  -3  -7  -8 40.8606 2.77680   1
   3  -7  -8 40.9829 3.18741   1
  -3  -7   8 40.5688 3.07639   1
  -3   7  -8 40.6909 3.03984   3
  -4  -7  -8 13.4723 2.09148   2
   4  -7   8 12.2754 1.88995   1
  -4  -7  -8 18.3010 2.22647   1
   4  -7  -8 13.1366 2.29670   1
  -4   7  -8 16.8747 2.32648   3
  -4  -7   8 18.3458 2.52952   1
  -5  -7  -8 6.83530 1.53605   1
  -5  -7  -8 4.58623 1.63453   2
   5  -7   8 9.58800 1.77288   1
   5  -7  -8 6.14980 1.75997   1
  -5  -7   8 9.29225 2.09710   1
  -5   7  -8 6.97116 1.87670   3
  -6  -7  -8 60.3328 4.08684   2
  -6  -7   8 54.7752 3.93765   1
  -6   7  -8 52.4008 3.91171   3
   6  -7  -8 56.0239 4.26324   1
  -7  -7  -8 11.0809 2.32739   2
   7  -7  -8 11.7366 2.65850   1
  -7   7  -8 14.5452 2.59515   3
  -7  -7   8 13.5794 2.52226   1
  -8  -7  -8 13.8723 2.74804   2
  -8  -7   8 8.17691 2.27263   1
   8  -7  -8 10.6380 2.70272   1
  -8   7  -8 11.5593 2.49608   3
  -9  -7  -8 16.3202 2.95080   2
  -9  -7   8 20.4346 3.34557   1
   9  -7  -8 25.8039 3.96772   1
  -9   7  -8 24.1823 3.57198   3
 -10  -7  -8 5.84066 2.17253   2
 -10  -7   8 7.58991 2.56307   1
  10  -7  -8 5.09907 2.32483   1
 -10   7  -8 2.83282 2.06173   3
 -11  -7   8 5.32857 2.44685   1
  11  -7  -8 6.05873 2.71776   1
   0  -8   8 7.52838 1.71339   1
   0  -8  -8 3.06992 1.27725   1
   0  -8  -8 4.96748 1.25646   2
  -1  -8  -8 24.9446 2.40075   2
   1  -8   8 24.1604 2.73124   1
  -1  -8  -8 22.3574 2.55141   1
  -1  -8   8 24.6415 2.82934   1
   1  -8  -8 26.3358 2.95154   1
  -2  -8  -8 13.4635 1.94927   2
   2  -8   8 12.9848 2.07968   1
  -2  -8  -8 10.7993 1.88939   1
  -2  -8   8 13.3822 2.31119   1
   2  -8  -8 9.40717 1.96946   1
  -2   8  -8 13.8737 2.10098   3
  -3  -8  -8 30.5759 3.04208   2
   3  -8   8 32.7792 3.14536   1
  -3  -8  -8 34.1259 3.11386   1
  -3  -8   8 26.8082 3.00004   1
  -3   8  -8 31.6698 3.17879   3
   3  -8  -8 30.4323 3.33186   1
  -4  -8  -8 50.0519 3.52658   2
   4  -8   8 48.2230 3.32368   1
  -4  -8  -8 44.8047 3.09513   1
   4  -8  -8 46.1524 3.68230   1
  -4   8  -8 46.1954 3.49745   3
  -4  -8   8 45.8783 3.54272   1
   5  -8   8 20.9186 2.70008   1
  -5  -8  -8 17.2157 2.33801   1
  -5  -8  -8 18.3809 2.66298   2
   5  -8  -8 19.7753 3.08938   1
  -5  -8   8 19.3781 2.74137   1
  -5   8  -8 16.7376 2.51604   3
  -6  -8  -8 12.5148 2.42093   2
   6  -8  -8 10.5152 2.56586   1
  -6  -8   8 14.9025 2.64170   1
  -6   8  -8 13.2630 2.43983   3
  -7  -8  -8 10.4304 2.39541   2
  -7  -8   8 11.7108 2.45187   1
  -7   8  -8 11.3727 2.38549   3
   7  -8  -8 10.7615 2.71039   1
  -8  -8  -8 31.8603 4.00238   2
  -8   8  -8 37.4212 4.09256   3
  -8  -8   8 44.8422 4.54369   1
   8  -8  -8 43.4718 4.80027   1
  -9  -8  -8 18.5679 3.21223   2
  -9  -8   8 18.0062 3.31219   1
  -9   8  -8 16.8422 3.08600   3
   9  -8  -8 20.7453 3.77366   1
  10  -8  -8 5.01782 2.57115   1
 -10  -8   8 0.53101 1.67048   1
 -10   8  -8 4.36155 2.15319   3
   0  -9  -8 17.3504 2.49944   1
   0  -9   8 14.0306 2.28223   1
  -1  -9  -8 4.86494 1.41705   2
  -1  -9  -8 2.37344 1.33239   1
   1  -9   8 3.46777 1.51230   1
  -1  -9   8 6.14961 1.83273   1
   1  -9  -8 2.69852 1.46318   1
   2  -9   8 42.9175 3.25192   1
  -2  -9  -8 44.4966 3.00679   2
  -2  -9  -8 45.9974 3.25987   1
   2  -9  -8 41.2811 3.90509   1
  -2  -9   8 42.3281 3.44017   1
   3  -9   8 53.9138 3.68722   1
  -3  -9  -8 57.6894 3.68609   2
  -3  -9  -8 55.5936 3.66595   1
   3  -9  -8 68.2001 4.49339   1
  -3  -9   8 51.5674 3.81243   1
  -3   9  -8 60.1113 3.94739   3
  -4  -9  -8 31.2189 3.16649   1
   4  -9   8 39.0033 3.67018   1
  -4  -9  -8 31.1264 3.32411   2
   4  -9  -8 39.3766 4.06894   1
  -4   9  -8 31.2654 3.35620   3
  -4  -9   8 27.9686 3.33150   1
  -5  -9  -8 6.17848 1.96088   2
   5  -9   8 9.42874 2.07225   1
  -5  -9  -8 5.94299 1.69024   1
  -5  -9   8 9.38091 2.23322   1
  -5   9  -8 3.03637 1.79956   3
   5  -9  -8 12.7113 2.54962   1
  -6  -9  -8 8.07074 2.21799   2
  -6   9  -8 8.71808 2.32277   3
   6  -9  -8 4.34472 1.75496   1
  -6  -9   8 6.67412 1.99966   1
  -7  -9  -8 9.90550 2.32122   2
   7  -9  -8 6.49781 2.29603   1
  -7  -9   8 7.68152 2.22834   1
  -7   9  -8 4.56244 2.02193   3
  -8  -9  -8 44.5599 4.64964   2
   8  -9  -8 35.2603 4.63151   1
  -8  -9   8 34.4063 4.25969   1
  -8   9  -8 39.1284 4.40002   3
  -9  -9  -8 1.42583 1.83411   2
  -9   9  -8 6.92789 2.49080   3
  -9  -9   8 7.88408 2.49641   1
   9  -9  -8 6.19544 2.65051   1
   0 -10  -8 10.7289 2.31617   1
   0 -10   8 8.58056 2.10302   1
   1 -10   8 50.8649 3.85078   1
  -1 -10  -8 52.5245 3.80727   1
  -1 -10   8 51.5324 3.94874   1
   1 -10  -8 47.0065 3.72844   1
  -2 -10  -8 21.3147 2.83717   1
   2 -10   8 18.4588 2.66999   1
   2 -10  -8 18.0058 2.79010   1
  -2 -10   8 14.2673 2.53327   1
  -3 -10  -8 73.5435 4.44791   1
   3 -10   8 73.9920 4.44739   1
  -3 -10  -8 75.4611 4.25643   2
  -3 -10   8 71.2021 4.76013   1
   3 -10  -8 73.4669 4.83594   1
   4 -10   8 3.57864 1.61806   1
  -4 -10  -8 2.17969 1.54567   1
  -4 -10  -8 6.07878 1.83276   2
   4 -10  -8 4.12872 1.91420   1
  -4 -10   8 0.55859 1.41929   1
  -4  10  -8 2.65455 1.47930   3
   5 -10   8 19.4339 3.01867   1
  -5 -10  -8 13.6347 2.58034   2
  -5 -10  -8 16.1087 2.60859   1
  -5  10  -8 13.9532 2.68367   3
  -5 -10   8 14.7450 2.86920   1
   5 -10  -8 15.1673 2.96996   1
  -6 -10  -8 11.3610 2.46147   2
   6 -10  -8 14.6626 2.85875   1
  -6  10  -8 11.1867 2.56614   3
  -6 -10   8 13.1504 2.62157   1
  -7 -10  -8 19.1468 3.27157   2
  -7 -10   8 24.3563 3.53124   1
  -7  10  -8 18.2989 3.29243   3
   7 -10  -8 19.4358 3.47339   1
  -8 -10  -8 6.27561 2.37616   2
  -8 -10   8 3.00850 1.86013   1
   8 -10  -8 4.34595 2.45261   1
  -8  10  -8 6.80066 2.38862   3
   0 -11  -8 -0.1916 1.28424   1
   0 -11   8 2.73325 1.57349   1
  -1 -11  -8 57.4445 4.20422   1
   1 -11   8 50.8283 4.63011   1
  -1 -11   8 49.9319 4.01080   1
   1 -11  -8 47.6860 4.52016   1
  -2 -11  -8 39.9613 4.00866   1
   2 -11   8 35.4834 3.85580   1
  -2 -11   8 35.7624 3.90100   1
   2 -11  -8 38.8279 4.21154   1
   3 -11   8 11.4015 2.33736   1
  -3 -11  -8 7.92050 2.10072   1
   3 -11  -8 10.3382 2.47176   1
  -3 -11   8 11.0204 2.44561   1
   4 -11   8 27.9122 3.53068   1
  -4 -11  -8 21.5107 3.01067   1
  -4 -11  -8 26.6618 3.28816   2
  -4 -11   8 20.9464 3.27312   1
   4 -11  -8 26.2343 3.78792   1
   5 -11   8 11.2626 2.47080   1
  -5 -11  -8 12.2868 2.46572   2
  -5  11  -8 11.2928 2.43112   3
  -5 -11   8 13.4019 2.72816   1
   5 -11  -8 12.9524 2.83507   1
  -6 -11  -8 22.7846 3.45246   2
  -6  11  -8 17.7465 3.10113   3
   6 -11  -8 15.8158 3.21532   1
  -6 -11   8 17.8175 3.18764   1
  -7 -11  -8 6.38367 2.40556   2
  -7  11  -8 3.39259 1.83621   3
  -7 -11   8 6.80514 2.30729   1
   7 -11  -8 5.78099 2.45236   1
   0 -12  -8 4.43246 2.06728   1
   0 -12   8 1.44223 1.55687   1
  -1 -12  -8 8.33396 2.32928   1
   1 -12   8 10.3635 2.36398   1
   1 -12  -8 10.1802 2.51519   1
  -1 -12   8 12.4517 2.56563   1
   2 -12   8 4.85642 2.02073   1
  -2 -12  -8 6.75076 2.16795   1
   2 -12  -8 3.67062 2.04373   1
  -2 -12   8 9.03149 2.30530   1
  -3 -12  -8 3.97682 1.93610   1
   3 -12   8 4.10846 1.74317   1
  -3 -12   8 5.49871 2.11681   1
   3 -12  -8 0.83000 1.66349   1
   4 -12   8 7.03835 2.23808   1
  -4 -12  -8 10.7456 2.39662   1
  -4 -12   8 8.52419 2.50904   1
   4 -12  -8 5.69040 2.18148   1
   5 -12   8 5.75569 2.13817   1
   5 -12  -8 7.47898 2.46968   1
  -5 -12   8 3.24999 2.04866   1
  -6 -12  -8 0.46820 1.69335   2
   0 -13  -8 10.9812 2.90809   1
   0 -13   8 8.53762 2.43328   1
  -1 -13  -8 -0.4622 1.46131   1
   1 -13   8 1.24853 1.68939   1
   1 -13  -8 0.52372 1.78931   1
  -1 -13   8 1.39109 1.61790   1
  -2 -13  -8 6.72098 2.16901   1
   2 -13   8 2.59400 1.96199   1
  -2 -13   8 3.33744 1.81695   1
   2 -13  -8 2.89458 2.03210   1
   3 -13   8 0.75444 1.62398   1
  -3 -13  -8 -2.8662 1.42780   1
   3 -13  -8 0.37851 1.72776   1
  -3 -13   8 -0.8219 1.51016   1
  -4 -13  -8 12.7567 2.83277   1
   4 -13   8 14.1677 2.93357   1
   5 -13   8 10.9109 2.73402   1
  -1 -14  -8 2.08771 1.85002   1
   0   0  -9 -0.1024 0.51445   1
   0   0  -9 -0.3964 0.53526   2
   1   0  -9 107.524 3.45917   2
  -1   0  -9 110.969 3.47304   2
   1   0  -9 109.121 3.53983   1
   1   0  -9 106.047 2.39898   3
   2   0  -9 269.522 6.95348   1
  -2   0  -9 278.819 6.47890   2
   2   0  -9 274.585 6.46784   2
   3   0  -9 152.295 5.11267   1
  -3   0  -9 151.906 4.50894   2
   3   0  -9 148.533 4.45451   2
  -4   0   9 161.825 3.19642   3
   4   0  -9 153.240 5.56364   1
  -4   0  -9 163.405 4.89835   2
  -5   0   9 202.102 4.40872   3
   5   0  -9 193.178 6.72396   1
  -5   0  -9 203.148 5.87891   2
  -6   0  -9 6.61389 1.33937   2
   6   0  -9 6.68240 1.66570   1
  -7   0  -9 39.8647 2.85752   2
   7   0  -9 40.5064 3.84210   1
  -8   0  -9 65.7699 3.75584   2
   8   0  -9 65.5574 4.50277   1
   9   0  -9 2.83802 1.74784   1
  -9   0  -9 2.54624 1.42999   2
 -10   0  -9 2.53360 1.54371   2
  10   0  -9 3.38742 1.92563   1
  11   0  -9 50.7174 5.38395   1
 -12   0   9 41.4148 5.19781   1
   0  -1   9 3.80923 0.80736   1
   0   1  -9 4.97684 0.76318   3
   0  -1  -9 5.03664 0.86070   1
   0   1  -9 3.65257 0.90876   2
   0  -1  -9 6.68459 1.10404   2
  -1  -1  -9 346.270 7.56492   2
   1   1  -9 349.737 6.37542   3
   1   1  -9 328.851 7.45536   2
   1  -1   9 349.525 6.81832   1
  -1  -1  -9 342.060 6.78205   1
   1  -1  -9 348.230 7.81479   1
  -1  -1   9 343.120 7.90052   1
  -1   1  -9 344.097 7.41532   3
   1  -1  -9 337.493 7.48537   2
  -1   1  -9 340.962 7.47851   2
   2   1  -9 45.2481 2.43227   1
  -2  -1  -9 44.5291 1.26458   1
   2  -1   9 44.1345 1.35105   1
   2   1  -9 44.1983 2.22192   2
  -2  -1  -9 39.3304 2.17096   2
  -2   1  -9 44.7941 2.18053   2
   2  -1  -9 41.6871 2.09351   2
   2  -1  -9 46.2070 2.49443   1
   3   1  -9 474.330 10.1406   2
   3  -1   9 476.182 8.40570   1
  -3  -1  -9 478.038 10.2122   2
   3   1  -9 472.857 11.0008   1
   3  -1  -9 489.428 11.1995   1
  -3   1  -9 477.767 9.87559   2
   3  -1  -9 493.380 9.90640   2
   4   1  -9 37.7079 2.65206   1
  -4  -1  -9 36.5112 2.29058   2
   4  -1   9 32.4370 1.13435   1
  -4   1   9 33.3426 1.11188   3
   4  -1  -9 33.7388 2.06654   2
  -4   1  -9 34.7669 2.12525   2
   4  -1  -9 28.2391 2.68225   1
   5   1  -9 104.738 4.65046   1
  -5   1   9 103.339 2.72545   3
  -5  -1  -9 98.6330 4.02570   2
  -5   1  -9 98.9144 3.74945   2
   5  -1  -9 97.4641 4.58667   1
   6   1  -9 27.1368 2.91747   1
  -6  -1  -9 23.4426 2.38843   2
   6  -1  -9 24.6282 2.87259   1
  -6   1  -9 26.5144 2.33195   2
   7   1  -9 42.1586 3.94376   1
  -7  -1  -9 41.4966 2.93199   2
  -7   1  -9 38.5636 2.72479   2
   7  -1  -9 43.7020 3.53877   1
   8   1  -9 73.7328 4.72106   1
  -8  -1  -9 83.0624 4.35392   2
   8  -1  -9 66.8521 4.59591   1
  -8   1  -9 77.7883 3.87336   2
  -9  -1  -9 42.6294 3.87782   2
  -9   1  -9 36.6495 3.28063   2
   9  -1  -9 38.0735 4.24289   1
 -10  -1  -9 34.6458 3.62999   2
 -10  -1   9 31.7075 4.10128   1
  10  -1  -9 36.4839 4.44161   1
 -10   1  -9 32.9741 4.05899   3
 -11  -1  -9 3.20948 1.84787   2
  11  -1  -9 3.79211 2.08663   1
 -11  -1   9 4.42635 2.23388   1
 -11   1  -9 4.40839 2.11001   3
  12  -1  -9 7.52884 2.77953   1
 -12   1  -9 10.0120 2.70180   3
 -12  -1   9 9.59930 2.96551   1
   0  -2  -9 260.335 6.12758   1
   0  -2   9 255.315 6.05836   1
   0   2  -9 262.688 5.76734   3
   0  -2  -9 260.490 6.17335   2
   0   2  -9 267.371 6.16400   2
  -1  -2  -9 278.032 6.54435   2
   1  -2   9 274.251 5.97335   1
   1   2  -9 268.844 6.48769   2
  -1  -2  -9 270.573 5.89655   1
   1   2  -9 274.300 5.62802   3
  -1   2  -9 270.272 6.32782   2
  -1   2  -9 284.398 6.47936   3
   1  -2  -9 271.344 6.39652   2
  -1  -2   9 280.167 6.83148   1
   1  -2  -9 282.884 6.84275   1
   2   2  -9 113.498 3.79919   2
   2  -2   9 109.935 2.91754   1
  -2  -2  -9 105.616 3.69348   2
  -2  -2  -9 109.297 2.80451   1
   2  -2  -9 107.502 3.48181   2
   2  -2  -9 116.798 4.13023   1
  -2   2  -9 112.333 3.87784   3
  -2   2  -9 114.091 3.61367   2
  -2  -2   9 115.005 4.17797   1
   3  -2   9 301.900 6.05308   1
  -3  -2  -9 299.911 5.72608   1
  -3  -2  -9 290.164 7.31249   2
  -3   2  -9 307.903 6.86114   2
  -3  -2   9 298.672 8.07612   1
   3  -2  -9 298.865 8.01241   1
  -3   2  -9 289.413 7.64363   3
   3  -2  -9 292.888 6.78208   2
  -4   2   9 46.3721 1.56368   3
  -4  -2  -9 46.7457 1.44893   1
   4  -2   9 46.3512 1.76909   1
  -4  -2  -9 41.9763 2.53293   2
   4  -2  -9 44.4149 2.94123   1
   4  -2  -9 40.2591 2.17385   2
  -4   2  -9 49.0971 3.00388   3
  -4   2  -9 40.7933 2.28969   2
  -4  -2   9 41.6454 2.92744   1
  -5   2   9 4.31236 0.76897   3
  -5  -2  -9 6.71360 1.45542   2
   5  -2  -9 6.48139 1.58320   1
  -5   2  -9 5.22168 1.12150   2
  -5  -2   9 7.50642 1.74251   1
  -5   2  -9 4.19521 1.29883   3
  -6  -2  -9 15.6324 2.16970   2
  -6  -2   9 12.7804 2.25144   1
   6  -2  -9 12.6294 2.20915   1
  -6   2  -9 11.1565 1.57165   2
  -6   2  -9 14.9110 2.21826   3
  -7  -2  -9 45.0012 3.27498   2
  -7  -2   9 42.4862 4.03967   1
  -7   2  -9 43.7790 2.76722   2
   7  -2  -9 45.8868 3.59564   1
  -7   2  -9 45.6064 4.07851   3
  -8  -2  -9 9.66061 2.05979   2
  -8   2  -9 10.3852 1.77446   2
  -8   2  -9 11.5164 2.33917   3
   8  -2  -9 9.79227 2.30540   1
  -8  -2   9 10.1582 2.51702   1
  -9  -2  -9 49.8587 3.81141   2
  -9   2  -9 39.0708 4.08490   3
  -9  -2   9 41.1136 4.44135   1
   9  -2  -9 45.4205 4.65676   1
 -10  -2  -9 9.10463 2.25828   2
  10  -2  -9 4.14100 2.02538   1
 -10   2  -9 5.36601 2.16014   3
 -10  -2   9 5.30122 2.15197   1
 -11  -2  -9 7.42654 2.19822   2
 -11  -2   9 8.19347 2.57326   1
 -11   2  -9 7.35824 2.45808   3
  11  -2  -9 6.09969 2.38922   1
 -12  -2  -9 27.8065 3.82751   2
  12  -2  -9 35.8046 4.94891   1
 -12   2  -9 17.5037 3.57676   3
 -12  -2   9 25.9390 4.19057   1
   0   3  -9 3.57158 0.91571   2
   0  -3   9 4.10493 0.93253   1
   0  -3  -9 5.48047 1.06219   2
   0   3  -9 3.72159 0.86802   3
   0  -3  -9 4.95145 0.99404   1
   1  -3   9 166.741 4.47134   1
   1   3  -9 164.358 4.67993   2
  -1  -3  -9 169.173 4.42260   1
   1   3  -9 169.980 4.19566   3
  -1  -3  -9 166.701 4.75814   2
  -1   3  -9 164.338 4.51318   2
  -1  -3   9 163.447 4.95246   1
   1  -3  -9 168.607 4.60605   2
  -1   3  -9 167.620 4.71657   3
  -2  -3  -9 19.1571 1.89948   2
  -2  -3  -9 20.6715 1.38855   1
   2  -3   9 18.6315 1.38841   1
   2   3  -9 16.6571 1.72551   2
  -2   3  -9 19.3807 1.64033   2
  -2   3  -9 21.6399 2.04415   3
  -2  -3   9 20.6454 2.10445   1
   2  -3  -9 21.2089 2.18180   1
   2  -3  -9 18.3243 1.64763   2
  -3  -3  -9 136.958 4.59567   2
  -3  -3  -9 138.872 3.52990   1
   3  -3   9 134.114 3.73090   1
   3  -3  -9 136.477 5.10346   1
  -3   3  -9 142.132 4.08632   2
  -3   3  -9 145.031 4.88649   3
  -3  -3   9 129.480 4.90751   1
   3  -3  -9 140.707 4.02659   2
  -4  -3  -9 45.2768 2.76629   2
  -4  -3  -9 47.7027 1.86139   1
   4  -3   9 46.5523 2.07641   1
  -4   3  -9 49.2147 2.37128   2
   4  -3  -9 46.9789 2.23336   2
  -4  -3   9 47.9368 3.11905   1
   4  -3  -9 52.4117 3.22688   1
  -4   3  -9 56.0423 3.13649   3
  -5   3   9 87.7069 2.83335   3
  -5   3  -9 90.4089 4.30580   3
  -5  -3   9 82.4470 4.32650   1
   5  -3  -9 86.3782 4.45903   1
  -5   3  -9 86.9186 3.25635   2
  -6  -3  -9 33.5839 3.09590   2
  -6   3  -9 34.0899 2.22728   2
  -6  -3   9 33.0479 3.45550   1
   6  -3  -9 26.7724 3.11329   1
  -6   3  -9 29.9952 3.15142   3
  -7  -3  -9 7.60403 1.77648   2
   7  -3  -9 11.2170 2.37477   1
  -7  -3   9 10.0591 2.23627   1
  -7   3  -9 10.9943 2.17744   3
  -8  -3  -9 255.349 8.54156   2
   8  -3  -9 268.928 9.64953   1
  -8   3  -9 259.783 9.07848   3
  -8  -3   9 267.769 9.46913   1
  -9  -3  -9 37.3072 3.85758   2
  -9   3  -9 28.8479 3.63244   3
  -9  -3   9 33.3000 4.00453   1
   9  -3  -9 32.2554 4.06440   1
 -10  -3  -9 11.8842 2.53212   2
  10  -3  -9 10.8961 2.71811   1
 -10   3  -9 11.8790 2.78476   3
 -10  -3   9 8.66812 2.49888   1
 -11  -3  -9 25.1571 3.61698   2
 -11  -3   9 26.0475 3.93101   1
  11  -3  -9 23.4836 3.80176   1
 -11   3  -9 27.7006 3.95563   3
 -12  -3  -9 9.08381 2.49043   2
 -12  -3   9 2.02072 1.97945   1
  12  -3  -9 1.17645 2.21372   1
 -12   3  -9 3.52871 2.13782   3
   0  -4  -9 17.3048 1.65936   2
   0   4  -9 20.4732 1.82335   3
   0   4  -9 16.2836 1.58574   2
   0  -4   9 16.8663 1.76166   1
   0  -4  -9 15.4587 1.70212   1
   1  -4   9 65.2296 2.77036   1
  -1  -4  -9 62.0895 2.83810   2
   1   4  -9 61.8124 2.81432   2
  -1  -4  -9 55.8744 2.55144   1
   1  -4  -9 59.1402 2.94442   1
   1  -4  -9 69.2393 2.76932   2
  -1   4  -9 60.2881 2.54539   2
  -1  -4   9 60.3791 2.99751   1
  -1   4  -9 67.0777 2.96931   3
  -2  -4  -9 135.148 3.96493   1
  -2  -4  -9 132.006 4.43016   2
   2  -4   9 131.592 4.02649   1
  -2  -4   9 122.413 4.58396   1
   2  -4  -9 130.158 3.92262   2
  -2   4  -9 128.116 3.78717   2
  -2   4  -9 122.312 4.39266   3
   2  -4  -9 144.611 4.94752   1
  -3  -4  -9 38.6595 2.56241   2
   3  -4   9 40.7328 2.11460   1
  -3  -4  -9 41.1361 2.01036   1
   3  -4  -9 44.8604 2.12665   2
  -3  -4   9 42.1401 2.74610   1
  -3   4  -9 41.8205 2.68603   3
   3  -4  -9 47.4829 3.02506   1
  -3   4  -9 44.8156 2.18748   2
   4  -4   9 68.1738 2.82534   1
  -4  -4  -9 64.0438 3.37164   2
  -4  -4  -9 68.1894 2.59129   1
  -4  -4   9 72.0815 3.80050   1
   4  -4  -9 71.2808 2.69205   2
  -4   4  -9 63.5641 3.52032   3
   4  -4  -9 69.2163 3.86081   1
  -4   4  -9 76.0122 2.83366   2
  -5   4   9 27.8081 1.80677   3
  -5  -4  -9 26.0267 2.68882   2
   5  -4   9 25.3085 1.85754   1
  -5  -4   9 23.3970 2.76136   1
  -5   4  -9 26.4005 2.81190   3
  -5   4  -9 28.2830 1.90201   2
   5  -4  -9 27.4292 3.04022   1
  -6  -4  -9 88.6100 4.50736   2
  -6  -4   9 89.1857 4.84586   1
   6  -4  -9 101.175 5.20418   1
  -6   4  -9 85.7680 4.60372   3
  -7  -4  -9 10.8657 2.10215   2
  -7  -4   9 7.42920 1.97974   1
   7  -4  -9 7.70069 2.09947   1
  -7   4  -9 9.01157 2.12871   3
  -8  -4  -9 28.8221 3.26246   2
  -8   4  -9 31.0789 3.68097   3
  -8  -4   9 32.1425 3.78965   1
   8  -4  -9 42.1019 4.37936   1
  -9  -4  -9 25.5987 3.38156   2
  -9  -4   9 40.1997 4.32943   1
  -9   4  -9 23.0848 3.33929   3
   9  -4  -9 26.4643 3.75694   1
 -10  -4  -9 16.1899 2.78920   2
  10  -4  -9 8.43821 2.60842   1
 -10  -4   9 14.0576 3.01494   1
 -10   4  -9 16.1947 2.91043   3
 -11  -4  -9 0.33701 1.74770   2
 -11  -4   9 0.22762 1.84383   1
 -11   4  -9 0.10147 1.67284   3
  11  -4  -9 -0.0194 1.83870   1
 -12  -4  -9 0.72335 1.63382   2
  12  -4  -9 3.67337 2.52070   1
 -12  -4   9 0.88053 1.83254   1
   0   5  -9 341.847 7.83918   2
   0  -5   9 338.128 8.50558   1
   0   5  -9 350.233 8.11731   3
   0  -5  -9 335.776 8.40614   1
   0  -5  -9 344.147 7.84866   2
   1  -5   9 93.2709 3.64545   1
  -1  -5  -9 96.8275 3.62002   1
  -1  -5  -9 92.3730 3.61415   2
  -1   5  -9 96.6845 3.30531   2
  -1   5  -9 91.1812 3.74758   3
  -1  -5   9 90.2114 3.85879   1
   1  -5  -9 95.8225 3.96835   1
   1  -5  -9 95.8726 3.34468   2
  -2  -5  -9 32.7798 2.29421   2
   2  -5   9 28.7303 2.04233   1
  -2  -5  -9 28.5021 1.96589   1
  -2   5  -9 27.3340 2.44931   3
  -2   5  -9 29.1584 1.78198   2
  -2  -5   9 25.0337 2.45117   1
   2  -5  -9 28.7628 2.69328   1
   2  -5  -9 27.6027 1.84471   2
   3  -5   9 13.0539 1.61863   1
  -3  -5  -9 9.32320 1.57009   2
  -3  -5  -9 11.1749 1.43586   1
  -3   5  -9 9.18450 1.20566   2
  -3   5  -9 8.12834 1.52769   3
  -3  -5   9 11.9647 1.90348   1
   3  -5  -9 9.45834 1.20552   2
   3  -5  -9 13.9082 2.05611   1
  -4  -5  -9 51.8155 2.53721   1
   4  -5   9 50.8052 2.69488   1
  -4  -5  -9 48.7616 3.05910   2
  -4  -5   9 51.7696 3.34883   1
  -4   5  -9 55.1917 2.37469   2
   4  -5  -9 59.1325 3.68210   1
  -4   5  -9 55.6470 3.40038   3
  -5  -5  -9 60.9324 3.67613   2
   5  -5   9 65.9462 3.15244   1
   5  -5  -9 67.7076 4.21684   1
  -5   5  -9 63.3470 3.82905   3
  -5  -5   9 58.5621 3.73458   1
  -6  -5  -9 83.3440 4.42734   2
   6  -5  -9 86.4802 5.00261   1
  -6  -5   9 79.6983 4.57283   1
  -7  -5  -9 17.6123 2.63304   2
  -7   5  -9 18.5594 2.82270   3
   7  -5  -9 17.4256 2.84451   1
  -7  -5   9 13.4920 2.46693   1
  -8  -5  -9 7.46300 1.98694   2
  -8  -5   9 8.12582 2.15910   1
   8  -5  -9 8.20719 2.33998   1
  -8   5  -9 9.01263 2.22961   3
  -9  -5  -9 11.6577 2.54125   2
   9  -5  -9 5.02231 2.14060   1
  -9   5  -9 14.1447 2.77612   3
  -9  -5   9 10.6019 2.54070   1
 -10  -5  -9 32.3512 4.02407   2
 -10   5  -9 21.4898 3.45399   3
  10  -5  -9 38.6479 4.73592   1
 -10  -5   9 27.2295 3.82036   1
 -11  -5  -9 0.52162 1.61636   2
 -11   5  -9 -0.3347 1.43887   3
  11  -5  -9 3.30378 1.98020   1
 -11  -5   9 0.54652 1.79377   1
   0  -6  -9 25.2209 2.12454   2
   0  -6  -9 25.9935 2.42363   1
   0  -6   9 23.9174 2.35353   1
   1  -6   9 42.3108 2.70334   1
  -1  -6  -9 43.3302 2.66611   1
  -1  -6  -9 39.9400 2.47698   2
  -1   6  -9 42.4339 2.74978   3
   1  -6  -9 40.0446 2.30252   2
  -1  -6   9 39.6639 2.71015   1
   1  -6  -9 40.1465 2.75392   1
   2  -6   9 25.8002 2.06181   1
  -2  -6  -9 21.2687 2.17643   2
  -2  -6  -9 25.9437 2.32853   1
  -2  -6   9 21.1740 2.37479   1
   2  -6  -9 22.7898 2.52824   1
  -2   6  -9 25.0798 2.53243   3
  -2   6  -9 20.7046 1.59240   2
   2  -6  -9 23.8547 1.93014   2
   3  -6   9 40.3635 2.58407   1
  -3  -6  -9 35.0669 2.67477   2
  -3  -6  -9 41.2994 2.50638   1
  -3   6  -9 34.5664 3.05739   3
   3  -6  -9 43.0633 3.11676   1
  -3  -6   9 41.7398 3.06264   1
  -4  -6  -9 29.6891 2.86058   2
   4  -6   9 29.6312 2.30986   1
  -4  -6  -9 29.7135 2.17873   1
  -4   6  -9 32.8467 3.06971   3
   4  -6  -9 30.4244 3.12570   1
  -4  -6   9 25.5894 2.83495   1
  -5  -6  -9 9.58944 1.86030   2
   5  -6   9 6.53590 1.46661   1
  -5   6  -9 7.66034 1.80907   3
   5  -6  -9 10.2323 2.13306   1
  -5  -6   9 9.81918 2.11220   1
  -6  -6  -9 44.9462 3.96381   2
  -6   6  -9 44.1659 3.47265   3
   6  -6  -9 41.3561 4.16025   1
  -6  -6   9 50.4308 3.83178   1
  -7  -6  -9 31.7616 3.44215   2
  -7  -6   9 25.0567 3.24811   1
  -7   6  -9 29.2672 3.43995   3
   7  -6  -9 31.7051 3.89930   1
  -8  -6  -9 16.8599 2.88443   2
   8  -6  -9 20.3283 3.29433   1
  -8   6  -9 18.9326 2.93480   3
  -8  -6   9 19.9968 3.09618   1
  -9  -6  -9 11.0971 2.46637   2
   9  -6  -9 10.0920 2.68727   1
  -9   6  -9 6.79138 2.16943   3
  -9  -6   9 12.1054 2.84342   1
 -10  -6  -9 11.0000 2.69732   2
  10  -6  -9 17.3818 3.41252   1
 -10   6  -9 9.93166 2.65604   3
 -10  -6   9 15.3165 3.01850   1
 -11  -6  -9 18.8621 3.38498   2
 -11  -6   9 26.2148 3.84599   1
  11  -6  -9 20.9590 3.94942   1
 -11   6  -9 19.5206 3.57363   3
   0  -7   9 20.7655 2.44530   1
   0  -7  -9 17.0640 2.23454   1
   0  -7  -9 14.6572 1.75367   2
  -1  -7  -9 40.6026 2.82542   1
  -1  -7  -9 39.2690 2.55057   2
   1  -7   9 45.8148 2.97898   1
   1  -7  -9 39.6827 2.91496   1
  -1   7  -9 36.9328 2.65982   3
   1  -7  -9 43.3814 2.40446   2
  -1  -7   9 42.5830 3.02050   1
  -2  -7  -9 13.6369 1.93983   2
  -2  -7  -9 16.4382 2.07483   1
   2  -7   9 17.0319 2.15304   1
  -2  -7   9 13.4795 2.07963   1
  -2   7  -9 13.9052 2.00186   3
   2  -7  -9 13.7054 2.18918   1
  -3  -7  -9 154.062 5.71684   2
   3  -7   9 166.658 5.77750   1
  -3  -7  -9 171.988 5.68575   1
  -3  -7   9 161.376 6.31336   1
   3  -7  -9 180.208 6.73129   1
  -3   7  -9 161.528 6.05165   3
   4  -7   9 2.00601 1.10832   1
  -4  -7  -9 3.30265 1.25725   1
  -4  -7  -9 2.49620 1.31473   2
  -4  -7   9 4.48828 1.60703   1
   4  -7  -9 0.77957 1.20533   1
  -4   7  -9 5.02992 1.54530   3
   5  -7   9 4.11696 1.31011   1
  -5  -7  -9 3.63238 1.50263   2
  -5  -7   9 2.10227 1.41462   1
  -5   7  -9 5.88838 1.71883   3
   5  -7  -9 4.84675 1.81722   1
  -6  -7  -9 39.3783 3.80907   2
  -6  -7   9 37.9251 3.87154   1
   6  -7  -9 38.0567 4.15230   1
  -6   7  -9 39.8964 3.90023   3
  -7  -7  -9 0.85624 1.33161   2
   7  -7  -9 1.78421 1.59451   1
  -7   7  -9 -1.1144 1.09912   3
  -7  -7   9 0.56587 1.44515   1
  -8  -7  -9 22.0872 3.10520   2
  -8   7  -9 22.9423 3.37943   3
   8  -7  -9 21.4150 3.51067   1
  -8  -7   9 28.9855 3.78263   1
  -9  -7  -9 0.80650 1.49264   2
   9  -7  -9 -2.0034 1.40937   1
  -9   7  -9 1.20054 1.67439   3
  -9  -7   9 -0.4694 1.57714   1
 -10  -7  -9 8.51547 2.50751   2
 -10  -7   9 5.36624 2.39956   1
 -10   7  -9 8.04500 2.51731   3
  10  -7  -9 8.92626 2.90043   1
   0  -8  -9 201.230 6.95010   1
   0  -8  -9 188.977 5.73521   2
   0  -8   9 192.118 6.87414   1
   1  -8   9 43.3725 3.09978   1
  -1  -8  -9 38.1814 2.70172   2
  -1  -8  -9 46.6073 3.26866   1
  -1  -8   9 46.5521 3.43411   1
   1  -8  -9 40.4032 3.23037   1
   2  -8   9 51.5909 3.32295   1
  -2  -8  -9 56.2879 3.45536   1
  -2  -8  -9 46.0854 3.04350   2
  -2   8  -9 56.2254 3.56807   3
   2  -8  -9 58.5152 3.85224   1
  -2  -8   9 52.3162 3.72578   1
   3  -8   9 52.6690 3.35110   1
  -3  -8  -9 54.5532 3.38936   1
  -3  -8  -9 49.4425 3.34755   2
  -3   8  -9 48.4362 3.41584   3
  -3  -8   9 53.2001 3.69396   1
   3  -8  -9 56.8189 3.93608   1
   4  -8   9 21.3269 2.61525   1
  -4  -8  -9 19.4190 2.55657   2
  -4  -8  -9 18.8763 2.39180   1
  -4   8  -9 14.8931 2.37165   3
  -4  -8   9 18.7038 2.69292   1
   4  -8  -9 19.5582 2.93687   1
   5  -8   9 6.59334 1.71624   1
  -5  -8  -9 6.80129 1.83391   2
   5  -8  -9 10.5648 2.33271   1
  -5   8  -9 6.74853 1.83650   3
  -5  -8   9 6.09763 1.76002   1
  -6  -8  -9 14.3746 2.57875   2
  -6  -8   9 12.4424 2.45880   1
  -6   8  -9 10.9804 2.33965   3
   6  -8  -9 15.7862 2.78303   1
  -7  -8  -9 14.3228 2.67942   2
  -7   8  -9 12.1578 2.49037   3
  -7  -8   9 16.9115 2.95962   1
   7  -8  -9 16.9479 3.22358   1
  -8  -8  -9 19.4217 3.09792   2
  -8   8  -9 14.9477 2.80886   3
   8  -8  -9 20.2263 3.44218   1
  -8  -8   9 22.2894 3.42805   1
  -9  -8  -9 24.5929 3.61003   2
  -9   8  -9 13.0964 2.90549   3
  -9  -8   9 22.8424 3.53819   1
   9  -8  -9 18.5243 3.68998   1
 -10   8  -9 21.0809 3.61060   3
  10  -8  -9 22.4813 4.11889   1
 -10  -8   9 20.6563 3.57107   1
   0  -9   9 0.21676 1.11304   1
   0  -9  -9 3.48281 1.49718   1
   1  -9   9 67.1651 4.11078   1
  -1  -9  -9 65.6672 4.01458   1
  -1  -9  -9 69.5912 3.54653   2
   1  -9  -9 75.2068 4.38634   1
  -1  -9   9 69.4385 4.26638   1
  -2  -9  -9 12.0064 2.15173   1
  -2  -9  -9 10.0096 1.86386   2
   2  -9   9 18.4295 2.49321   1
   2  -9  -9 13.7457 2.48061   1
  -2   9  -9 13.1238 2.30117   3
  -2  -9   9 13.5186 2.36447   1
  -3  -9  -9 3.03150 1.40863   2
  -3  -9  -9 6.80265 1.71612   1
   3  -9   9 7.36066 1.81283   1
   3  -9  -9 7.41538 2.02418   1
  -3   9  -9 4.04147 1.54756   3
  -3  -9   9 2.31393 1.47271   1
  -4  -9  -9 75.1522 4.23166   1
  -4  -9  -9 70.2210 4.32514   2
   4  -9   9 86.9314 4.62307   1
  -4   9  -9 63.7282 4.29845   3
  -4  -9   9 77.2631 4.81312   1
   4  -9  -9 71.5075 4.79712   1
   5  -9   9 13.1578 2.38163   1
  -5  -9  -9 12.3749 2.44007   2
  -5   9  -9 12.7364 2.52467   3
  -5  -9   9 11.7305 2.46073   1
   5  -9  -9 12.7198 2.64144   1
  -6  -9  -9 3.12761 1.80400   2
   6  -9  -9 4.98309 2.13501   1
  -6  -9   9 4.39504 1.98630   1
  -6   9  -9 3.57299 1.87281   3
  -7  -9  -9 5.36380 1.91108   2
  -7  -9   9 5.23226 2.00297   1
   7  -9  -9 7.44686 2.41099   1
  -7   9  -9 4.91467 2.09559   3
  -8  -9  -9 1.67203 1.83355   2
  -8  -9   9 2.22473 1.78789   1
  -8   9  -9 0.12554 1.66672   3
   8  -9  -9 2.92452 2.02633   1
  -9  -9  -9 2.58676 1.88389   2
  -9   9  -9 0.09023 1.81725   3
  -9  -9   9 2.03233 2.04232   1
   9  -9  -9 3.59200 2.23170   1
   0 -10   9 21.8080 2.93419   1
   0 -10  -9 26.2085 3.20660   1
  -1 -10  -9 12.6682 2.33679   1
   1 -10   9 13.1742 2.46432   1
  -1 -10   9 9.33368 2.31907   1
   1 -10  -9 11.4632 2.42606   1
   2 -10   9 32.1031 3.42574   1
  -2 -10  -9 30.3425 3.33066   1
   2 -10  -9 35.7384 3.83577   1
  -2 -10   9 30.0933 3.48120   1
   3 -10   9 32.5826 3.43574   1
  -3 -10  -9 27.5081 3.09696   2
  -3 -10  -9 30.6483 3.29116   1
  -3  10  -9 28.6776 3.41230   3
   3 -10  -9 40.2750 4.27873   1
  -3 -10   9 26.6119 3.48864   1
  -4 -10  -9 15.7592 2.56860   2
  -4 -10  -9 10.6486 2.24735   1
   4 -10   9 14.7710 2.56813   1
  -4  10  -9 13.5097 2.43731   3
  -4 -10   9 16.8484 2.86870   1
   4 -10  -9 14.1769 2.82122   1
   5 -10   9 40.4101 4.00110   1
  -5 -10  -9 35.5160 3.81459   2
   5 -10  -9 41.4836 4.54405   1
  -5 -10   9 36.6872 4.07384   1
  -5  10  -9 32.6239 3.67345   3
  -6 -10  -9 11.2043 2.49754   2
  -6  10  -9 8.48644 2.41383   3
  -6 -10   9 9.79462 2.54336   1
   6 -10  -9 5.06503 2.11125   1
  -7 -10  -9 3.26934 1.91741   2
   7 -10  -9 2.10931 2.16442   1
  -7 -10   9 2.34048 1.78915   1
  -7  10  -9 4.18494 2.05328   3
  -8 -10  -9 11.1144 3.00924   2
  -8 -10   9 12.2967 2.83491   1
  -8  10  -9 12.8671 2.90997   3
   8 -10  -9 9.98315 2.89819   1
   0 -11  -9 5.43014 1.86667   1
   0 -11   9 3.38248 1.63978   1
   1 -11   9 0.49972 1.53104   1
  -1 -11  -9 3.86048 1.82375   1
  -1 -11   9 2.13139 1.58031   1
   1 -11  -9 2.81318 1.73672   1
   2 -11   9 26.2950 3.39022   1
  -2 -11  -9 29.0392 3.51344   1
  -2 -11   9 21.7040 3.20422   1
   2 -11  -9 28.5098 3.76170   1
  -3 -11  -9 126.789 6.18353   1
   3 -11   9 137.213 6.42450   1
  -3 -11   9 119.740 6.37948   1
   3 -11  -9 128.082 6.77956   1
  -4 -11  -9 6.37949 1.92803   2
   4 -11   9 3.88007 1.81764   1
  -4 -11  -9 6.88412 2.02386   1
   4 -11  -9 4.24963 1.94105   1
  -4 -11   9 6.95879 2.10737   1
  -5 -11  -9 2.83927 1.72623   2
   5 -11   9 1.47063 1.51891   1
   5 -11  -9 -1.2443 1.46228   1
  -5 -11   9 0.84874 1.58924   1
  -5  11  -9 1.20377 1.66771   3
  -6 -11  -9 35.3429 4.08541   2
  -6  11  -9 25.9063 3.60875   3
  -6 -11   9 26.6970 3.81830   1
   6 -11  -9 28.9757 4.14852   1
  -7 -11  -9 19.9725 3.38349   2
   7 -11  -9 22.3450 3.88766   1
  -7  11  -9 11.3006 2.69031   3
  -7 -11   9 16.0942 3.16316   1
   0 -12  -9 0.22564 1.47161   1
   0 -12   9 0.30616 1.49335   1
  -1 -12  -9 -0.6719 1.70192   1
   1 -12   9 1.88329 1.61149   1
  -1 -12   9 1.13120 1.62122   1
   1 -12  -9 2.44745 1.81538   1
   2 -12   9 7.02821 2.17855   1
  -2 -12  -9 5.80734 2.03687   1
  -2 -12   9 9.41426 2.38577   1
   2 -12  -9 7.38640 2.31963   1
  -3 -12  -9 8.95609 2.35570   1
   3 -12   9 11.9198 2.58287   1
   3 -12  -9 12.0391 2.89653   1
  -3 -12   9 6.52496 2.26703   1
  -4 -12  -9 9.56568 2.50338   1
   4 -12   9 10.4670 2.43445   1
  -4 -12   9 7.92879 2.36201   1
   4 -12  -9 8.87224 2.57376   1
   5 -12   9 7.26830 2.25423   1
   5 -12  -9 14.4845 3.07242   1
  -5 -12   9 4.42459 2.05924   1
  -6 -12  -9 0.20794 1.69058   2
   0 -13   9 1.30496 1.53414   1
   0 -13  -9 -1.6984 1.44246   1
  -1 -13  -9 13.2397 2.97126   1
   1 -13   9 19.5714 3.30888   1
  -1 -13   9 14.8724 3.12176   1
   1 -13  -9 19.0197 3.36295   1
   2 -13   9 -0.1075 1.42828   1
  -2 -13  -9 -0.2911 1.64848   1
  -2 -13   9 -0.1239 1.70912   1
   2 -13  -9 -1.3042 1.50373   1
  -3 -13  -9 5.89239 2.27756   1
   3 -13   9 4.13197 2.13833   1
   3 -13  -9 4.20669 2.26242   1
  -3 -13   9 7.32966 2.50719   1
   4 -13   9 -0.0128 1.68597   1
   5 -13   9 17.1212 3.24037   1
   0   0 -10 430.002 8.71781   1
   0   0 -10 411.422 8.97041   2
   1   0 -10 20.2755 0.98799   3
   1   0 -10 20.5196 1.59174   1
  -1   0 -10 23.1446 1.73424   2
   1   0 -10 16.9294 1.66324   2
   2   0  10 103.359 2.15900   1
   2   0 -10 101.442 3.54622   2
   2   0 -10 102.908 3.85028   1
  -2   0 -10 104.484 3.59727   2
  -3   0 -10 18.5840 1.83651   2
   3   0 -10 14.8381 1.87862   1
   3   0 -10 15.2406 1.67105   2
  -4   0 -10 300.306 7.40266   2
   4   0 -10 292.739 8.34191   1
   4   0 -10 289.135 7.31281   2
  -5   0 -10 1.61037 0.95789   2
   5   0 -10 3.20674 1.24648   1
  -6   0 -10 29.2432 2.63661   2
   6   0 -10 26.7349 3.05567   1
  -7   0 -10 18.4383 2.29486   2
   7   0 -10 14.2909 2.51159   1
   8   0 -10 13.8792 2.72092   1
  -8   0 -10 16.6714 2.30415   2
  -9   0 -10 5.06955 1.69680   2
   9   0 -10 10.9011 2.60083   1
  10   0 -10 -0.2033 1.47770   1
 -10   0 -10 0.80028 1.38127   2
  11   0 -10 -0.5252 1.74891   1
 -12   0  10 80.9117 6.16140   1
   0   1 -10 227.220 5.13709   3
   0   1 -10 242.124 5.87973   2
   0  -1 -10 226.999 5.47913   1
   0  -1 -10 227.162 5.76841   2
   0  -1  10 220.464 5.50146   1
   1  -1  10 134.777 3.39992   1
   1   1 -10 138.265 4.14850   2
  -1  -1 -10 136.044 4.20861   2
  -1  -1 -10 136.761 3.41910   1
   1   1 -10 131.345 3.08367   3
   1  -1 -10 136.702 4.12039   2
  -1   1 -10 129.511 4.05867   2
  -1   1 -10 131.652 3.93058   3
   1  -1 -10 129.920 4.14582   1
  -1  -1  10 130.948 4.22495   1
  -2  -1 -10 3.77988 0.49228   1
   2  -1  10 4.48231 0.53427   1
  -2  -1 -10 4.41830 1.00407   2
   2   1 -10 4.31025 0.97867   2
   2   1 -10 3.03297 0.97483   1
   2  -1 -10 1.90398 0.80966   2
  -2   1 -10 4.23401 1.04999   2
   2  -1 -10 3.03637 0.99116   1
  -3  -1 -10 96.6620 3.65092   2
   3   1 -10 98.5027 3.64148   2
   3   1 -10 102.900 4.13471   1
   3  -1 -10 93.4329 3.41968   2
  -3   1 -10 97.9663 3.54379   2
   3  -1 -10 94.9146 4.08461   1
  -4  -1 -10 17.1582 1.88040   2
   4   1 -10 15.0125 2.02959   1
   4  -1 -10 14.4617 1.63941   2
   4  -1 -10 15.3734 2.08299   1
  -4   1 -10 13.5093 1.62327   2
  -5  -1 -10 121.912 4.58456   2
   5   1 -10 113.715 5.06235   1
  -5   1 -10 123.083 4.29790   2
   5  -1 -10 118.126 5.18453   1
   6   1 -10 53.8073 3.66889   1
  -6  -1 -10 57.1706 3.30182   2
   6  -1 -10 60.1675 3.95200   1
  -6   1 -10 62.2662 3.18226   2
  -7  -1 -10 4.14993 1.39345   2
   7   1 -10 1.82710 1.42615   1
  -7   1 -10 1.91205 1.13388   2
   7  -1 -10 1.33786 1.37604   1
  -8  -1 -10 0.24510 1.20546   2
   8   1 -10 1.67454 1.53957   1
  -8   1 -10 0.79028 1.17765   2
   8  -1 -10 0.75636 1.40545   1
  -9  -1 -10 29.6270 3.19247   2
   9  -1 -10 34.0772 4.03328   1
  -9   1 -10 31.9732 3.14411   2
 -10  -1 -10 1.65438 1.50540   2
 -10  -1  10 -2.1030 1.43477   1
 -10   1 -10 -0.2239 1.53192   3
  10  -1 -10 3.38607 1.87341   1
 -11  -1 -10 2.04393 1.58431   2
 -11  -1  10 2.20321 1.91909   1
  11  -1 -10 5.40799 2.40560   1
 -11   1 -10 3.09209 1.98423   3
 -12   1 -10 1.78241 1.86872   3
  12  -1 -10 2.44353 2.13162   1
 -12  -1  10 3.07539 2.26489   1
   0  -2 -10 332.284 7.59920   2
   0   2 -10 343.772 7.67122   2
   0   2 -10 336.371 7.12995   3
   0  -2 -10 341.117 7.58384   1
   0  -2  10 334.550 7.52585   1
   1  -2  10 173.041 4.34977   1
   1   2 -10 177.142 4.07825   3
   1   2 -10 185.273 5.05472   2
  -1  -2 -10 171.480 4.96637   2
  -1  -2 -10 173.125 4.34997   1
  -1  -2  10 179.690 5.13443   1
   1  -2 -10 174.635 4.88178   2
  -1   2 -10 171.640 4.82718   2
   1  -2 -10 174.363 5.10316   1
  -1   2 -10 170.959 4.77402   3
  -2  -2 -10 160.803 4.82539   2
   2  -2  10 161.254 3.81977   1
   2   2 -10 164.144 4.85881   2
  -2  -2 -10 165.526 3.73785   1
  -2   2 -10 147.789 4.51846   2
  -2  -2  10 151.688 5.06441   1
   2  -2 -10 161.833 5.16265   1
   2  -2 -10 157.900 4.58082   2
  -2   2 -10 155.418 4.81842   3
  -3  -2 -10 31.3973 2.27549   2
   3  -2  10 32.3707 1.36337   1
  -3  -2 -10 28.0086 1.16813   1
   3   2 -10 29.5372 2.11684   2
  -3   2 -10 31.1961 2.39314   3
   3  -2 -10 32.4514 2.00798   2
  -3  -2  10 33.7722 2.52097   1
  -3   2 -10 39.1996 2.20169   2
   3  -2 -10 36.2436 2.56561   1
  -4  -2 -10 93.7124 3.91368   2
   4  -2  10 102.509 2.72811   1
  -4  -2 -10 98.3184 2.27313   1
   4  -2 -10 102.611 3.62688   2
   4  -2 -10 101.017 4.52441   1
  -4  -2  10 97.0677 4.49060   1
  -4   2 -10 98.2531 4.25563   3
  -4   2 -10 107.771 3.68200   2
  -5  -2 -10 6.02733 1.41602   2
  -5  -2  10 6.38127 1.73016   1
  -5   2 -10 2.69339 1.31861   3
   5  -2 -10 4.96103 1.53451   1
  -5   2 -10 6.17878 1.21837   2
  -6  -2 -10 9.85908 1.73175   2
  -6  -2  10 8.65909 1.93548   1
  -6   2 -10 14.0367 2.25174   3
   6  -2 -10 8.78280 1.96471   1
  -6   2 -10 9.90523 1.55360   2
  -7  -2 -10 7.70485 1.86169   2
  -7  -2  10 4.95257 1.83713   1
   7  -2 -10 9.42351 2.12939   1
  -7   2 -10 9.89055 1.68163   2
  -7   2 -10 6.91956 1.85951   3
  -8  -2 -10 56.6915 3.73114   2
  -8  -2  10 65.4837 4.71551   1
  -8   2 -10 61.2121 3.38426   2
   8  -2 -10 60.2254 4.43249   1
  -8   2 -10 58.7833 4.19102   3
  -9  -2 -10 7.15647 2.04632   2
  -9  -2  10 10.1691 2.54172   1
  -9   2 -10 6.82587 2.13865   3
   9  -2 -10 6.98457 2.21174   1
 -10  -2 -10 4.05166 1.88248   2
 -10   2 -10 3.61387 2.07773   3
  10  -2 -10 0.19853 1.62663   1
 -10  -2  10 4.45370 2.20904   1
 -11  -2 -10 26.4960 3.54145   2
  11  -2 -10 32.0458 4.32419   1
 -11   2 -10 26.5187 3.97453   3
 -11  -2  10 35.0190 4.62207   1
 -12  -2 -10 1.01865 1.69091   2
  12  -2 -10 0.82645 2.18963   1
 -12  -2  10 -0.4507 1.75144   1
 -12   2 -10 0.41112 1.95043   3
   0  -3 -10 40.6256 2.20037   1
   0   3 -10 46.3728 2.23518   3
   0  -3 -10 45.6467 2.35250   2
   0   3 -10 42.5461 2.31851   2
   0  -3  10 41.1400 2.21428   1
  -1  -3 -10 88.2799 3.40217   2
   1   3 -10 83.3292 2.77295   3
   1   3 -10 83.5679 3.31651   2
   1  -3  10 84.2144 3.02353   1
  -1  -3 -10 87.1021 2.99644   1
  -1   3 -10 84.4016 3.25847   3
  -1   3 -10 85.6928 3.20970   2
  -1  -3  10 87.9136 3.44425   1
   1  -3 -10 91.9903 3.57105   1
   1  -3 -10 86.0608 3.26041   2
   2   3 -10 255.504 6.63117   2
   2  -3  10 248.796 5.81302   1
  -2  -3 -10 256.173 5.69586   1
  -2  -3 -10 257.294 6.64518   2
   2  -3 -10 238.199 6.09606   2
  -2   3 -10 250.837 6.71659   3
  -2  -3  10 253.738 7.03079   1
  -2   3 -10 248.825 6.12100   2
   2  -3 -10 250.098 7.08215   1
  -3  -3 -10 100.545 4.00511   2
  -3  -3 -10 105.458 2.98832   1
   3  -3  10 103.679 3.17265   1
  -3   3 -10 112.612 3.71521   2
  -3   3 -10 112.383 4.35478   3
   3  -3 -10 112.171 3.64880   2
   3  -3 -10 117.984 4.69179   1
  -3  -3  10 108.376 4.47549   1
   4  -3  10 64.6503 2.40087   1
  -4  -3 -10 63.2945 2.12868   1
  -4  -3 -10 64.0790 3.24779   2
  -4   3 -10 68.6499 2.86120   2
  -4  -3  10 58.6488 3.53222   1
  -4   3 -10 65.9081 3.51573   3
   4  -3 -10 62.9568 2.73321   2
   4  -3 -10 68.1097 3.77390   1
  -5  -3 -10 60.0078 3.34040   2
  -5   3 -10 63.4766 3.65261   3
  -5  -3  10 60.0646 3.75760   1
  -5   3 -10 60.2619 2.87670   2
   5  -3 -10 61.0961 3.86959   1
   5  -3 -10 56.6714 2.75575   2
  -6  -3 -10 5.58954 1.49157   2
  -6  -3  10 8.89271 2.01332   1
  -6   3 -10 7.71883 1.89285   3
   6  -3 -10 5.49206 1.73336   1
  -6   3 -10 5.88552 1.26946   2
  -7  -3 -10 85.9250 4.53024   2
  -7   3 -10 81.9036 4.71675   3
  -7  -3  10 78.0985 4.79695   1
   7  -3 -10 79.8861 4.93279   1
  -8  -3 -10 8.58549 2.11598   2
  -8   3 -10 7.63706 2.07621   3
  -8  -3  10 15.3845 2.81434   1
   8  -3 -10 6.50783 1.94648   1
  -9  -3 -10 11.5341 2.40173   2
  -9   3 -10 11.1648 2.51580   3
  -9  -3  10 7.36332 2.33493   1
   9  -3 -10 10.0701 2.53785   1
 -10  -3 -10 41.1501 4.27313   2
  10  -3 -10 39.9008 4.67294   1
 -10  -3  10 39.5660 4.60704   1
 -10   3 -10 42.3521 4.66654   3
 -11  -3 -10 1.87091 1.68180   2
 -11  -3  10 4.00499 2.15558   1
  11  -3 -10 6.27339 2.52458   1
 -11   3 -10 0.21965 1.72895   3
 -12  -3 -10 41.4160 4.60358   2
  12  -3 -10 44.1423 5.44616   1
 -12  -3  10 32.5809 4.65474   1
   0   4 -10 256.428 6.32050   3
   0  -4 -10 247.598 6.56906   1
   0  -4 -10 244.771 6.31003   2
   0  -4  10 267.806 6.71922   1
   0   4 -10 235.101 6.18887   2
  -1  -4 -10 131.042 4.32554   2
   1   4 -10 131.797 4.34694   2
  -1  -4 -10 134.615 4.17544   1
   1  -4  10 129.437 4.18735   1
  -1  -4  10 123.996 4.45752   1
   1  -4 -10 136.943 4.62629   1
  -1   4 -10 133.680 4.38319   3
   1  -4 -10 133.018 4.14218   2
  -1   4 -10 124.126 3.98890   2
   2  -4  10 96.7306 3.40571   1
  -2  -4 -10 94.9011 3.23296   1
  -2  -4 -10 94.9939 3.76876   2
  -2   4 -10 95.7950 3.38320   2
  -2   4 -10 93.4972 3.79296   3
  -2  -4  10 94.4430 4.04531   1
   2  -4 -10 95.7096 3.38433   2
   3  -4  10 209.367 5.38644   1
  -3  -4 -10 191.846 6.04221   2
  -3  -4 -10 211.246 5.21029   1
  -3   4 -10 205.641 6.34512   3
  -3   4 -10 208.081 5.36865   2
   3  -4 -10 201.888 5.30375   2
   3  -4 -10 205.358 6.76957   1
  -3  -4  10 205.477 6.58239   1
  -4  -4 -10 53.0369 2.21085   1
  -4  -4 -10 52.1918 3.06470   2
   4  -4  10 49.0623 2.37102   1
  -4   4 -10 49.9391 2.51299   2
   4  -4 -10 48.4292 3.33309   1
  -4  -4  10 56.3784 3.41437   1
   4  -4 -10 50.2447 2.37823   2
  -4   4 -10 54.2832 3.34109   3
  -5  -4 -10 69.1634 3.72981   2
   5  -4 -10 66.5136 4.09480   1
  -5  -4  10 69.3206 4.04539   1
  -5   4 -10 66.7693 3.82826   3
  -5   4 -10 73.8389 3.02914   2
   5  -4 -10 71.1631 2.94444   2
  -6  -4 -10 9.63317 1.95144   2
   6  -4 -10 11.4171 2.26263   1
  -6   4 -10 9.11307 1.92687   3
  -6  -4  10 13.0343 2.32861   1
  -7  -4 -10 8.52084 1.99243   2
  -7   4 -10 9.46864 2.09029   3
   7  -4 -10 6.51342 1.96401   1
  -7  -4  10 4.62399 1.76474   1
  -8  -4 -10 26.6299 3.28301   2
  -8   4 -10 27.7500 3.50763   3
   8  -4 -10 25.7578 3.54320   1
  -8  -4  10 26.5073 3.47165   1
  -9  -4 -10 28.1430 3.47757   2
   9  -4 -10 33.6141 4.19463   1
  -9  -4  10 29.9102 3.89164   1
  -9   4 -10 30.1502 3.81165   3
 -10  -4 -10 3.22642 1.90717   2
 -10   4 -10 8.92962 2.52161   3
  10  -4 -10 5.59687 2.33513   1
 -10  -4  10 0.66666 1.74101   1
 -11  -4 -10 2.80329 1.88613   2
 -11   4 -10 2.01820 2.06985   3
 -11  -4  10 1.86856 1.97410   1
  11  -4 -10 0.14583 1.83626   1
   0   5 -10 7.12534 1.28230   3
   0   5 -10 6.68479 1.24128   2
   0  -5 -10 9.09305 1.34201   2
   0  -5 -10 10.6670 1.58558   1
   0  -5  10 5.75670 1.23486   1
   1  -5  10 137.396 4.63944   1
  -1  -5 -10 133.577 4.47979   1
  -1  -5 -10 134.064 4.50690   2
  -1   5 -10 138.845 4.22562   2
   1  -5 -10 138.284 4.95024   1
  -1  -5  10 129.000 4.81304   1
   1  -5 -10 134.613 4.27746   2
  -1   5 -10 129.818 4.61340   3
  -2  -5 -10 2.71579 1.03635   2
  -2  -5 -10 3.87315 1.03042   1
   2  -5  10 4.13697 1.03488   1
  -2   5 -10 5.43449 1.08307   2
  -2  -5  10 4.71128 1.23605   1
   2  -5 -10 3.95036 1.00667   2
  -2   5 -10 5.68944 1.31943   3
   2  -5 -10 3.95925 1.24324   1
  -3  -5 -10 88.6680 3.33739   1
  -3  -5 -10 93.0703 4.04624   2
   3  -5  10 93.6241 3.59996   1
   3  -5 -10 88.1350 3.19339   2
  -3   5 -10 90.8177 3.16997   2
  -3   5 -10 87.5219 4.11995   3
  -3  -5  10 86.4765 4.16260   1
   4  -5  10 108.525 3.96102   1
  -4  -5 -10 109.698 3.74324   1
  -4  -5 -10 115.570 4.75790   2
  -4  -5  10 112.741 5.01938   1
  -4   5 -10 104.489 4.73253   3
   4  -5 -10 107.033 5.10818   1
  -4   5 -10 106.911 3.55780   2
  -5  -5 -10 14.1170 2.15001   2
  -5  -5  10 9.58640 1.98313   1
   5  -5 -10 17.7675 2.63562   1
  -5   5 -10 17.2002 2.41933   3
  -6  -5 -10 49.8916 3.56417   2
  -6   5 -10 44.9659 4.00113   3
   6  -5 -10 50.0994 3.91190   1
  -6  -5  10 47.1613 3.62889   1
  -7  -5 -10 9.80756 2.12118   2
  -7   5 -10 9.92768 2.21001   3
   7  -5 -10 10.6809 2.39335   1
  -7  -5  10 9.10748 2.13691   1
  -8   5 -10 93.1676 5.44665   3
  -8  -5  10 96.1119 5.67348   1
   8  -5 -10 92.0827 5.71106   1
  -9  -5 -10 14.2677 2.76245   2
   9  -5 -10 12.1538 2.86884   1
  -9   5 -10 12.7703 2.65805   3
  -9  -5  10 11.7372 2.80882   1
 -10  -5 -10 -1.0102 1.53401   2
 -10  -5  10 -0.0115 1.59139   1
 -10   5 -10 0.36165 1.61393   3
  10  -5 -10 2.95002 1.90225   1
 -11  -5 -10 2.97448 1.90110   2
 -11  -5  10 5.08102 2.34877   1
 -11   5 -10 4.16948 2.33512   3
  11  -5 -10 9.79780 2.87630   1
   0   6 -10 1005.54 19.5090   3
   0  -6  10 1004.99 20.3341   1
   0  -6 -10 1000.67 18.8679   2
   0  -6 -10 1006.30 20.2821   1
   1  -6  10 31.3407 2.42940   1
  -1  -6 -10 33.5403 2.34717   2
  -1  -6 -10 35.4506 2.47631   1
   1  -6 -10 36.3562 2.24742   2
   1  -6 -10 31.7987 2.92542   1
  -1  -6  10 37.1436 2.67608   1
  -1   6 -10 33.1132 2.14086   2
  -1   6 -10 32.0707 2.46230   3
  -2  -6 -10 153.092 5.05396   1
  -2  -6 -10 151.114 5.20883   2
   2  -6  10 146.598 5.08769   1
  -2   6 -10 149.168 4.41699   2
  -2  -6  10 154.919 5.68961   1
   2  -6 -10 156.082 5.81572   1
  -2   6 -10 155.256 5.46231   3
   2  -6 -10 148.858 4.52638   2
   3  -6  10 94.5078 3.93632   1
  -3  -6 -10 97.0133 4.21344   2
  -3  -6 -10 95.4594 3.82743   1
  -3  -6  10 104.086 4.69601   1
   3  -6 -10 83.4315 4.42242   1
  -3   6 -10 98.7327 4.46639   3
  -4  -6 -10 24.0831 2.19624   1
  -4  -6 -10 20.4525 2.50866   2
   4  -6  10 20.1360 2.18013   1
  -4  -6  10 19.9466 2.63875   1
  -4   6 -10 18.6199 2.44474   3
   4  -6 -10 14.5241 2.50015   1
  -5  -6 -10 156.748 6.06391   2
  -5   6 -10 147.797 6.06928   3
   5  -6 -10 144.877 6.54755   1
  -5  -6  10 143.033 6.17470   1
  -6  -6 -10 33.1720 3.34949   2
  -6   6 -10 37.4470 3.77208   3
   6  -6 -10 36.9435 3.96840   1
  -6  -6  10 40.4428 3.92434   1
  -7  -6 -10 54.5369 3.95260   2
  -7   6 -10 48.8259 4.45759   3
  -7  -6  10 53.8134 4.12175   1
   7  -6 -10 55.6338 4.35725   1
  -8  -6 -10 29.5923 3.68519   2
  -8   6 -10 23.9676 3.39549   3
  -8  -6  10 19.3731 3.18627   1
   8  -6 -10 25.0748 3.64075   1
  -9  -6 -10 34.1250 3.98285   2
  -9  -6  10 40.3577 4.57088   1
  -9   6 -10 35.0618 4.19714   3
   9  -6 -10 41.9839 4.90484   1
 -10  -6 -10 14.0411 2.98395   2
  10  -6 -10 18.5628 3.72373   1
 -10  -6  10 19.5379 3.51235   1
 -10   6 -10 21.5087 3.57858   3
  11  -6 -10 25.0174 4.20576   1
 -11  -6  10 13.4018 3.03053   1
   0  -7  10 63.1085 3.59525   1
   0  -7 -10 59.7881 3.04658   2
   0  -7 -10 60.4856 3.44401   1
  -1  -7 -10 95.5854 4.22756   1
   1  -7  10 81.3180 4.06287   1
  -1  -7 -10 83.7537 3.74476   2
   1  -7 -10 94.6798 4.54044   1
  -1  -7  10 92.1129 4.46853   1
   1  -7 -10 80.6405 3.46506   2
  -1   7 -10 79.7760 3.95494   3
  -2  -7 -10 27.5667 2.65370   2
  -2  -7 -10 34.0940 2.60702   1
   2  -7  10 35.3805 2.69085   1
  -2  -7  10 38.7053 2.97207   1
  -2   7 -10 33.3559 3.12003   3
   2  -7 -10 35.0189 3.37515   1
  -3  -7 -10 123.085 4.71433   1
  -3  -7 -10 119.581 4.94123   2
   3  -7  10 120.740 4.82153   1
   3  -7 -10 112.586 5.40375   1
  -3   7 -10 117.750 5.17623   3
  -3  -7  10 115.515 5.30410   1
   4  -7  10 8.06079 1.65142   1
  -4  -7 -10 9.62076 1.65506   1
  -4  -7 -10 9.27072 1.86960   2
   4  -7 -10 7.92317 1.96694   1
  -4   7 -10 8.89108 1.94720   3
  -4  -7  10 4.95504 1.61645   1
  -5  -7 -10 5.41186 1.65457   2
  -5   7 -10 2.90307 1.44175   3
   5  -7 -10 4.42286 1.74917   1
  -5  -7  10 4.54734 1.70282   1
  -6  -7 -10 21.3112 2.84348   2
  -6  -7  10 21.8542 3.07931   1
  -6   7 -10 17.5505 2.74644   3
   6  -7 -10 23.4950 3.49128   1
  -7  -7 -10 4.76977 1.76797   2
  -7  -7  10 2.65659 1.77655   1
   7  -7 -10 4.82140 2.05168   1
  -7   7 -10 5.75299 1.99285   3
  -8  -7 -10 -1.5779 1.24416   2
   8  -7 -10 -0.5509 1.42278   1
  -8  -7  10 -0.8689 1.45977   1
  -8   7 -10 -1.1471 1.39526   3
  -9  -7 -10 2.37025 1.65854   2
  -9   7 -10 2.51246 1.81158   3
   9  -7 -10 -1.0371 1.43426   1
  -9  -7  10 2.54427 1.94496   1
 -10  -7 -10 48.7238 5.06122   2
  10  -7 -10 42.3872 5.27096   1
 -10   7 -10 43.4222 4.84632   3
 -10  -7  10 53.9636 5.51936   1
   0  -8  10 24.5690 2.82126   1
   0  -8 -10 30.1293 2.54053   2
   0  -8 -10 28.7450 2.98639   1
  -1  -8 -10 56.5823 3.19882   2
  -1  -8 -10 62.2855 3.72453   1
   1  -8  10 62.3981 3.72992   1
  -1  -8  10 58.9466 3.84780   1
   1  -8 -10 55.7439 3.67929   1
  -2  -8 -10 59.2827 3.55098   1
   2  -8  10 61.4724 3.68533   1
  -2  -8 -10 56.8974 3.39553   2
  -2  -8  10 61.1256 4.02530   1
  -2   8 -10 58.9951 3.63765   3
   2  -8 -10 66.9408 4.11233   1
  -3  -8 -10 41.5689 2.96605   1
   3  -8  10 36.6922 3.31731   1
  -3  -8 -10 39.6580 3.06554   2
  -3   8 -10 45.6315 3.42803   3
  -3  -8  10 37.4981 3.64060   1
   3  -8 -10 45.2008 3.59390   1
  -4  -8 -10 6.83086 1.76389   2
   4  -8  10 5.55721 1.54882   1
  -4  -8 -10 6.18425 1.62072   1
  -4   8 -10 4.14433 1.60014   3
   4  -8 -10 3.92208 1.67907   1
  -4  -8  10 5.26016 1.70795   1
  -5  -8 -10 11.6851 2.25585   2
  -5   8 -10 13.4529 2.45899   3
  -5  -8  10 10.0236 2.17212   1
   5  -8 -10 5.91603 2.02238   1
  -6  -8 -10 1.84070 1.46785   2
   6  -8 -10 0.63150 1.53568   1
  -6   8 -10 1.00908 1.40943   3
  -6  -8  10 0.00689 1.45147   1
  -7  -8 -10 70.7984 4.69566   2
   7  -8 -10 70.2817 5.24788   1
  -7   8 -10 77.6256 4.96171   3
  -7  -8  10 72.3399 5.04807   1
  -8  -8 -10 15.3888 2.95936   2
  -8   8 -10 17.4744 3.09406   3
  -8  -8  10 16.9117 3.10250   1
   8  -8 -10 16.5973 3.23087   1
  -9  -8 -10 0.95425 1.72814   2
  -9  -8  10 0.55658 1.62353   1
   9  -8 -10 -0.2763 1.58862   1
  -9   8 -10 1.35404 1.95726   3
   0  -9  10 0.13777 1.16091   1
   0  -9 -10 0.86873 1.25759   1
  -1  -9 -10 52.5876 3.61793   1
   1  -9  10 50.2823 3.66046   1
  -1  -9 -10 47.8903 3.13636   2
   1  -9 -10 53.2872 3.88634   1
  -1  -9  10 51.5896 3.76440   1
   2  -9  10 17.7982 2.52613   1
  -2  -9 -10 16.6054 2.28075   2
  -2  -9 -10 21.3836 2.72323   1
   2  -9 -10 17.7450 2.73843   1
  -2   9 -10 18.3360 2.66074   3
  -2  -9  10 22.7140 2.97203   1
   3  -9  10 19.9947 2.64721   1
  -3  -9 -10 12.0671 2.21867   1
  -3  -9 -10 11.1785 2.07173   2
  -3   9 -10 15.6130 2.44714   3
   3  -9 -10 15.5111 2.62668   1
  -3  -9  10 9.33947 2.19373   1
  -4  -9 -10 5.66978 1.67345   1
   4  -9  10 7.03952 1.77080   1
  -4  -9 -10 5.85860 1.69214   2
  -4  -9  10 3.31404 1.64983   1
   4  -9 -10 8.87078 2.37502   1
  -4   9 -10 9.19789 2.13935   3
  -5  -9 -10 59.5625 4.06308   2
  -5   9 -10 51.7968 3.94153   3
  -5  -9  10 58.2276 4.34606   1
   5  -9 -10 54.7610 4.40727   1
  -6  -9 -10 16.6178 2.72013   2
  -6  -9  10 16.6329 2.93269   1
  -6   9 -10 20.1389 3.05342   3
   6  -9 -10 15.0538 3.01404   1
  -7  -9 -10 29.2863 3.80836   2
  -7   9 -10 23.5243 3.37742   3
  -7  -9  10 23.7836 3.51984   1
   7  -9 -10 19.2686 3.36768   1
  -8  -9 -10 9.39100 2.56434   2
   8  -9 -10 9.73941 2.83618   1
  -8   9 -10 8.70944 2.50576   3
  -8  -9  10 9.79367 2.65403   1
  -9   9 -10 -0.4289 1.66618   3
  -9  -9  10 -1.6799 1.45991   1
   9  -9 -10 -0.8344 1.65982   1
   0 -10 -10 4.62101 1.79683   1
   0 -10  10 8.28967 2.03379   1
   1 -10  10 9.02030 2.01661   1
  -1 -10 -10 9.53546 2.24392   1
   1 -10 -10 12.9370 2.51575   1
  -1 -10  10 13.8039 2.45727   1
  -2 -10 -10 0.80315 1.33097   1
   2 -10  10 -2.2199 0.88384   1
   2 -10 -10 -0.1890 1.48718   1
  -2 -10  10 1.62206 1.41518   1
   3 -10  10 7.53677 2.00037   1
  -3 -10 -10 15.7308 2.58659   1
  -3 -10 -10 12.1562 2.16030   2
  -3 -10  10 10.8698 2.35113   1
  -3  10 -10 6.86969 1.96757   3
   3 -10 -10 7.43532 2.21179   1
  -4 -10 -10 4.19522 1.64716   1
   4 -10  10 4.72565 1.72915   1
  -4 -10 -10 1.37630 1.28943   2
   4 -10 -10 2.18398 1.69237   1
  -4 -10  10 -0.4432 1.37925   1
  -4  10 -10 1.24173 1.34188   3
  -5 -10 -10 1.76506 1.54263   2
   5 -10 -10 -0.0303 1.65249   1
  -5  10 -10 0.75670 1.45869   3
  -5 -10  10 -0.6123 1.42914   1
  -6 -10 -10 16.9110 2.94701   2
  -6  10 -10 12.6976 2.64854   3
  -6 -10  10 13.6333 2.78195   1
  -7 -10 -10 15.6926 3.00501   2
   7 -10 -10 13.1901 3.01201   1
  -7  10 -10 12.7160 2.88681   3
  -7 -10  10 14.7258 2.97879   1
  -8 -10 -10 8.30451 2.53371   2
  -8  10 -10 2.06884 2.10375   3
  -8 -10  10 5.36986 2.25763   1
   8 -10 -10 3.90177 2.27908   1
   0 -11 -10 1.97047 1.60992   1
   0 -11  10 1.76393 1.48374   1
   1 -11  10 10.3082 2.32797   1
  -1 -11 -10 11.9692 2.56411   1
   1 -11 -10 10.8674 2.52037   1
  -1 -11  10 10.8144 2.44233   1
   2 -11  10 44.7976 4.37930   1
  -2 -11 -10 43.5712 4.27785   1
   2 -11 -10 41.6469 4.45217   1
  -2 -11  10 39.8973 4.30758   1
  -3 -11 -10 22.5611 3.10532   1
   3 -11  10 20.5947 3.03657   1
  -3 -11  10 16.9923 2.92209   1
   3 -11 -10 20.5542 3.32785   1
   4 -11  10 47.9836 4.50523   1
  -4 -11 -10 47.4304 4.32979   2
   4 -11 -10 51.3108 5.14420   1
  -4 -11  10 51.3159 4.88718   1
  -4  11 -10 43.1017 4.30820   3
  -5 -11 -10 -1.9788 1.33035   2
   5 -11 -10 0.75976 1.56163   1
  -5 -11  10 1.52637 1.71127   1
  -5  11 -10 -0.0660 1.47453   3
  -6 -11 -10 1.08745 1.87153   2
   6 -11 -10 2.93899 2.00138   1
  -6  11 -10 2.56743 1.76402   3
  -6 -11  10 2.06425 1.88520   1
  -7 -11 -10 11.4484 2.82174   2
   0 -12  10 9.93205 2.50298   1
   0 -12 -10 15.1824 2.88550   1
   1 -12  10 16.5642 2.92419   1
  -1 -12 -10 17.7447 3.09795   1
   1 -12 -10 14.4959 2.87492   1
  -1 -12  10 17.9346 2.95613   1
   2 -12  10 15.4818 2.90337   1
  -2 -12 -10 17.3849 2.99351   1
   2 -12 -10 10.9822 2.71559   1
  -2 -12  10 13.0321 2.86507   1
   3 -12  10 3.06342 1.67704   1
  -3 -12 -10 3.73579 1.73352   1
  -3 -12  10 1.36775 1.70433   1
   3 -12 -10 -0.4695 1.83731   1
   4 -12  10 -1.7390 1.39340   1
   4 -12 -10 0.46991 1.73060   1
  -4 -12  10 -0.1538 1.63378   1
   5 -12 -10 24.8214 4.02715   1
  -5 -12  10 21.7077 3.56439   1
  -6 -12 -10 5.55576 2.25913   2
   0 -13 -10 9.85233 2.65010   1
   0 -13  10 11.4456 2.71517   1
   1 -13  10 5.93206 2.12830   1
  -1 -13 -10 4.53203 2.13444   1
   1 -13 -10 1.41478 1.78199   1
  -1 -13  10 4.90053 2.13300   1
  -2 -13 -10 1.81089 1.89252   1
   2 -13  10 2.89179 1.82673   1
   2 -13 -10 2.11582 1.82303   1
  -2 -13  10 2.98754 1.81253   1
  -3 -13 -10 8.40816 2.37252   1
   3 -13  10 2.76355 2.08029   1
   3 -13 -10 2.16263 1.94512   1
   4 -13  10 -1.7428 1.65587   1
   0   0 -11 -0.1556 0.58918   1
   0   0 -11 0.89089 0.77613   2
   1   0 -11 12.3123 1.49675   2
  -1   0 -11 12.5216 1.55234   2
   1   0 -11 13.4883 0.92266   3
   1   0 -11 10.6078 1.40612   1
   1   0  11 14.4167 1.19320   1
   2   0 -11 306.741 7.84807   1
   2   0 -11 305.447 7.38506   2
  -2   0 -11 305.285 7.36319   2
   2   0  11 302.669 5.64097   1
   3   0 -11 11.6107 1.48822   2
   3   0 -11 9.20889 1.63320   1
  -3   0 -11 11.7643 1.58420   2
   4   0 -11 149.575 4.89893   2
   4   0 -11 156.606 5.76735   1
  -4   0 -11 156.011 4.97402   2
   5   0 -11 140.613 5.78975   1
  -5   0 -11 144.763 4.97250   2
  -6   0 -11 18.5922 2.16488   2
   6   0 -11 21.6218 2.88770   1
   7   0 -11 4.25192 1.68798   1
  -7   0 -11 4.07660 1.42258   2
   8   0 -11 11.0081 2.42149   1
  -8   0 -11 12.1682 2.13039   2
   9   0 -11 24.4290 3.56740   1
  -9   0 -11 36.0291 3.44451   2
 -10   0 -11 11.5174 2.28052   2
  10   0 -11 13.5801 2.98709   1
  11   0 -11 73.2699 5.59153   1
 -12   0  11 5.80918 2.48229   1
 -12   0 -11 4.35558 2.38453   3
   0  -1 -11 279.866 6.89337   2
   0  -1  11 282.066 6.61052   1
   0   1 -11 280.895 6.15313   3
   0  -1 -11 284.650 6.57738   1
   0   1 -11 285.771 6.88942   2
   1   1 -11 90.0719 2.41994   3
  -1  -1 -11 89.6830 3.40628   2
   1   1 -11 89.5952 3.38531   2
   1  -1  11 91.7214 2.71942   1
  -1  -1 -11 89.5875 2.68441   1
  -1   1 -11 85.6191 3.41338   2
  -1   1 -11 84.6136 3.13416   3
   1  -1 -11 84.0294 3.31335   2
  -1  -1  11 81.3343 3.37808   1
   1  -1 -11 83.2457 3.31502   1
  -2  -1 -11 29.5853 2.18118   2
   2  -1  11 32.5950 1.25861   1
   2   1 -11 28.7870 2.12150   1
  -2  -1 -11 33.6884 1.21310   1
   2   1 -11 28.4399 2.03980   2
   2  -1 -11 32.2073 2.32909   1
  -2   1 -11 31.6373 2.17068   2
   2  -1 -11 30.9969 2.01159   2
  -3  -1 -11 48.2936 2.63998   2
   3   1 -11 46.4285 2.63102   2
   3   1 -11 46.7211 2.85659   1
  -3   1 -11 50.2826 2.60920   2
   3  -1 -11 43.8226 2.41598   2
   3  -1 -11 48.8012 3.00740   1
   4   1 -11 109.617 4.73736   1
  -4  -1 -11 117.533 4.30457   2
   4   1 -11 115.527 4.29740   2
   4  -1 -11 112.905 4.85728   1
  -4   1 -11 110.490 4.03966   2
   4  -1 -11 118.301 4.13264   2
  -5  -1 -11 218.859 6.53989   2
   5   1 -11 219.287 7.42541   1
  -5   1 -11 221.722 6.26681   2
   5  -1 -11 210.325 7.39735   1
  -6  -1 -11 23.6047 2.49462   2
   6   1 -11 24.8325 3.01232   1
  -6   1 -11 23.8881 2.37344   2
   6  -1 -11 24.4347 2.98520   1
  -7  -1 -11 40.5302 3.05368   2
   7   1 -11 42.4885 4.03059   1
   7  -1 -11 42.7884 4.16103   1
  -7   1 -11 45.5367 2.98954   2
   8   1 -11 38.4161 4.00841   1
  -8  -1 -11 44.3890 3.24445   2
   8  -1 -11 42.2113 4.30091   1
  -8   1 -11 42.1954 3.07619   2
  -9  -1 -11 37.7925 3.68048   2
  -9   1 -11 44.0611 3.28015   2
   9  -1 -11 46.7704 4.69851   1
 -10  -1 -11 35.5466 3.79500   2
  10  -1 -11 27.1722 3.92683   1
 -10  -1  11 38.9020 4.81736   1
 -10   1 -11 31.2447 4.05145   3
 -11  -1 -11 5.77191 2.09006   2
  11  -1 -11 6.09047 2.41601   1
 -11  -1  11 3.43411 2.23304   1
 -11   1 -11 5.08564 2.33324   3
 -12  -1  11 7.18313 2.68356   1
  12  -1 -11 9.63162 3.05603   1
 -12   1 -11 7.36272 2.71596   3
   0  -2  11 251.593 6.15729   1
   0   2 -11 245.114 6.35221   2
   0   2 -11 243.546 5.74975   3
   0  -2 -11 256.646 6.22013   1
   0  -2 -11 251.700 6.37145   2
   1   2 -11 31.2747 1.56283   3
   1  -2  11 29.5659 1.64872   1
  -1  -2 -11 31.1555 2.10884   2
   1   2 -11 32.4553 2.11076   2
  -1  -2 -11 35.3419 1.77573   1
   1  -2 -11 31.3012 2.07895   1
  -1   2 -11 37.0022 2.11535   3
  -1   2 -11 32.0068 2.07939   2
  -1  -2  11 31.1257 2.14746   1
   1  -2 -11 34.5717 2.15448   2
  -2  -2 -11 103.978 2.86762   1
   2   2 -11 101.214 3.80470   2
  -2  -2 -11 111.966 4.00054   2
   2  -2  11 105.331 2.90535   1
   2  -2 -11 101.167 3.63259   2
  -2   2 -11 104.334 3.68667   2
   2  -2 -11 105.877 4.14419   1
  -2  -2  11 103.678 4.12367   1
  -2   2 -11 103.768 3.85842   3
   3  -2  11 2.93178 0.55091   1
  -3  -2 -11 2.75329 0.50068   1
  -3  -2 -11 1.80632 0.87438   2
   3   2 -11 2.50057 0.93024   2
  -3  -2  11 4.19759 1.23095   1
   3  -2 -11 3.98868 1.24922   1
  -3   2 -11 2.43633 0.99938   3
   3  -2 -11 4.44975 1.05070   2
  -3   2 -11 4.03828 1.06689   2
  -4  -2 -11 43.2741 2.71054   2
  -4  -2  11 49.8426 3.37220   1
   4  -2 -11 45.3030 3.12139   1
   4  -2 -11 47.3890 2.49955   2
  -4   2 -11 40.6051 2.91910   3
  -4   2 -11 46.8248 2.57752   2
  -5  -2 -11 119.441 4.73355   2
  -5   2 -11 124.538 4.35076   2
  -5  -2  11 125.866 5.55015   1
  -5   2 -11 124.523 5.19492   3
   5  -2 -11 120.049 4.30305   2
   5  -2 -11 118.203 5.34715   1
  -6  -2 -11 37.4098 2.81043   2
   6  -2 -11 44.7483 3.55693   1
  -6  -2  11 43.6824 3.52836   1
  -6   2 -11 40.1971 2.61286   2
  -6   2 -11 42.5035 3.26324   3
  -7  -2 -11 224.097 7.38710   2
  -7   2 -11 223.803 8.11291   3
  -7   2 -11 221.056 6.64636   2
   7  -2 -11 226.243 8.51794   1
  -7  -2  11 230.298 8.61506   1
  -8  -2 -11 1.61918 1.46038   2
   8  -2 -11 2.42854 1.66507   1
  -8   2 -11 1.61884 1.58298   3
  -8  -2  11 2.86271 1.75659   1
  -8   2 -11 0.23472 1.15974   2
  -9  -2 -11 6.79677 1.86400   2
  -9   2 -11 4.90179 2.07666   3
  -9  -2  11 5.86510 2.23189   1
   9  -2 -11 5.09462 2.04422   1
 -10  -2 -11 0.97254 1.50843   2
  10  -2 -11 4.97135 2.08051   1
 -10  -2  11 1.26439 1.90560   1
 -10   2 -11 2.96263 1.87192   3
 -11  -2 -11 29.0910 3.71169   2
 -11   2 -11 29.0037 4.17487   3
  11  -2 -11 24.3184 4.11796   1
 -11  -2  11 24.8165 3.98189   1
 -12  -2 -11 19.6592 3.37970   2
 -12  -2  11 15.0274 3.34033   1
  12  -2 -11 15.9935 3.65448   1
   0  -3 -11 466.262 9.87764   2
   0   3 -11 444.705 9.33206   3
   0  -3 -11 421.301 9.87309   1
   0  -3  11 469.718 9.93946   1
   0   3 -11 451.310 9.72512   2
   1   3 -11 61.8900 2.90149   2
   1  -3  11 58.1460 2.46960   1
  -1  -3 -11 60.2000 2.47681   1
   1   3 -11 54.8488 2.27866   3
  -1  -3 -11 58.9410 2.89143   2
  -1   3 -11 60.9703 2.79657   2
  -1   3 -11 59.1581 2.75061   3
  -1  -3  11 60.6483 2.89289   1
   1  -3 -11 59.5086 2.87160   2
   1  -3 -11 56.7304 2.96435   1
   2   3 -11 30.7993 2.25177   2
  -2  -3 -11 28.0517 1.62258   1
   2  -3  11 30.8205 1.69679   1
  -2  -3 -11 28.2202 2.11340   2
  -2  -3  11 27.7329 2.20394   1
   2  -3 -11 28.4276 2.02356   2
  -2   3 -11 32.3134 2.11822   2
   2  -3 -11 33.0038 2.46947   1
  -2   3 -11 29.5285 2.13364   3
  -3  -3 -11 51.9771 2.88213   2
  -3  -3 -11 49.2597 1.92503   1
   3  -3  11 52.8268 2.12209   1
  -3   3 -11 47.2328 2.86441   3
   3  -3 -11 54.5971 3.21910   1
  -3  -3  11 52.2384 3.15051   1
   3  -3 -11 52.8663 2.56282   2
  -3   3 -11 54.8216 2.66976   2
  -4  -3 -11 163.895 5.61063   2
   4  -3 -11 163.834 6.17433   1
   4  -3 -11 165.031 4.85826   2
  -4   3 -11 163.186 5.82773   3
  -4   3 -11 168.693 4.97028   2
  -4  -3  11 160.433 6.08017   1
  -5  -3 -11 38.6596 2.78578   2
   5  -3 -11 43.6636 3.31683   1
  -5  -3  11 41.9971 3.26204   1
   5  -3 -11 44.5307 2.50739   2
  -5   3 -11 41.6805 2.53774   2
  -5   3 -11 43.9731 3.13821   3
  -6  -3 -11 5.12820 1.50081   2
  -6  -3  11 3.65361 1.56389   1
   6  -3 -11 4.18202 1.57260   1
  -6   3 -11 4.18738 1.51215   3
  -6   3 -11 4.66049 1.28839   2
  -7  -3 -11 33.7932 3.40927   2
   7  -3 -11 33.6469 3.85117   1
  -7  -3  11 36.7194 3.95279   1
  -7   3 -11 21.0945 2.90815   3
  -8  -3 -11 19.1463 2.71580   2
  -8   3 -11 18.2884 2.89395   3
  -8  -3  11 24.5885 3.42439   1
   8  -3 -11 25.9179 3.50749   1
  -9  -3 -11 13.3055 2.51446   2
  -9   3 -11 6.56683 2.14938   3
  -9  -3  11 7.21600 2.27572   1
   9  -3 -11 9.86875 2.53662   1
 -10  -3 -11 0.88628 1.65244   2
 -10   3 -11 1.48113 1.87998   3
  10  -3 -11 4.27211 2.26717   1
 -10  -3  11 -0.3518 1.69856   1
 -11  -3 -11 31.9081 4.02465   2
 -11   3 -11 29.6728 4.24112   3
 -11  -3  11 27.4021 4.07936   1
  11  -3 -11 28.1833 4.36425   1
 -12  -3 -11 5.58831 2.36485   2
 -12  -3  11 2.08947 1.82244   1
   0  -4 -11 109.813 3.96360   2
   0  -4  11 117.545 4.11540   1
   0  -4 -11 106.468 3.97355   1
   0   4 -11 107.476 3.84998   2
   0   4 -11 113.773 3.84831   3
  -1  -4 -11 51.0968 2.66605   2
   1  -4  11 46.4998 2.45685   1
  -1  -4 -11 47.8157 2.44784   1
   1   4 -11 50.8226 2.40150   3
   1   4 -11 47.4158 2.65812   2
  -1   4 -11 52.5734 2.65366   3
   1  -4 -11 50.1306 2.83049   1
   1  -4 -11 45.7881 2.51650   2
  -1   4 -11 53.2127 2.60353   2
  -1  -4  11 51.4812 2.79775   1
   2   4 -11 148.982 4.93549   2
  -2  -4 -11 138.527 4.87080   2
   2  -4  11 149.408 4.44127   1
  -2  -4 -11 139.038 4.18796   1
   2  -4 -11 145.954 4.51978   2
   2  -4 -11 147.737 5.34420   1
  -2  -4  11 143.081 5.19351   1
  -2   4 -11 155.717 5.11190   3
  -2   4 -11 148.643 4.49070   2
  -3  -4 -11 104.286 3.32583   1
  -3  -4 -11 105.344 4.26584   2
   3  -4  11 102.135 3.46062   1
  -3   4 -11 113.298 3.81302   2
   3  -4 -11 104.178 4.68290   1
   3  -4 -11 102.993 3.66752   2
  -3  -4  11 106.538 4.57575   1
  -3   4 -11 108.150 4.47203   3
  -4  -4 -11 70.7335 3.68013   2
   4  -4 -11 70.2963 4.09707   1
  -4  -4  11 74.4995 4.01455   1
  -4   4 -11 72.8482 3.84941   3
   4  -4 -11 72.2650 3.06648   2
  -4   4 -11 71.1719 3.08773   2
  -5  -4 -11 140.864 5.37290   2
  -5  -4  11 122.779 5.56499   1
   5  -4 -11 130.005 4.25908   2
  -5   4 -11 130.945 4.32948   2
   5  -4 -11 119.105 5.63063   1
  -5   4 -11 125.016 5.38466   3
  -6  -4 -11 7.68925 1.74622   2
  -6  -4  11 10.3975 2.19037   1
   6  -4 -11 9.37858 2.15193   1
  -6   4 -11 9.63660 1.91666   3
  -7  -4 -11 27.1972 3.12987   2
   7  -4 -11 31.2922 3.69945   1
  -7  -4  11 28.0621 3.43861   1
  -7   4 -11 28.6552 3.31570   3
  -8  -4 -11 17.4750 2.74908   2
  -8   4 -11 10.1985 2.43603   3
  -8  -4  11 13.6411 2.74991   1
   8  -4 -11 16.5987 3.00020   1
  -9  -4 -11 57.1329 4.94835   2
  -9   4 -11 54.3298 5.02603   3
  -9  -4  11 62.3591 4.76053   1
   9  -4 -11 55.1212 5.31052   1
 -10  -4 -11 3.63904 1.81200   2
 -10  -4  11 4.61964 2.20236   1
  10  -4 -11 1.61687 2.04406   1
 -10   4 -11 5.45113 2.25480   3
 -11  -4 -11 -0.3410 1.82767   2
  11  -4 -11 5.62215 2.62465   1
 -11   4 -11 4.43636 2.14465   3
 -11  -4  11 3.92250 2.24961   1
   0  -5 -11 5.81780 1.31472   1
   0   5 -11 6.62702 1.23536   3
   0  -5 -11 7.27182 1.30437   2
   0   5 -11 6.65665 1.26249   2
   0  -5  11 6.05451 1.33123   1
   1   5 -11 41.3609 2.56944   2
   1  -5  11 40.3970 2.51012   1
  -1  -5 -11 39.8600 2.42908   1
  -1  -5 -11 42.6686 2.61985   2
  -1   5 -11 38.7390 2.27579   2
  -1  -5  11 40.9699 2.71434   1
   1  -5 -11 41.3198 2.79287   1
  -1   5 -11 39.6881 2.57234   3
   1  -5 -11 34.5178 2.33366   2
   2  -5  11 195.220 5.67054   1
  -2  -5 -11 197.054 6.05245   2
  -2  -5 -11 197.211 5.54038   1
  -2   5 -11 189.251 5.28439   2
  -2   5 -11 185.021 5.97490   3
  -2  -5  11 204.332 6.51301   1
   2  -5 -11 189.501 6.43348   1
   2  -5 -11 192.246 5.44272   2
   3  -5  11 202.067 5.77017   1
  -3  -5 -11 207.559 5.60290   1
  -3  -5 -11 200.152 6.38779   2
  -3   5 -11 202.451 5.42780   2
  -3   5 -11 205.016 6.64450   3
   3  -5 -11 213.094 7.21671   1
  -3  -5  11 210.404 6.94016   1
   3  -5 -11 200.431 5.50039   2
   4  -5  11 65.6474 3.04285   1
  -4  -5 -11 68.6408 3.64838   2
  -4   5 -11 58.5734 3.54980   3
  -4   5 -11 66.1161 2.88896   2
   4  -5 -11 65.7654 2.82473   2
  -4  -5  11 59.7118 3.73679   1
   4  -5 -11 64.2749 4.01063   1
  -5  -5 -11 67.5710 3.82271   2
  -5   5 -11 71.4117 4.10943   3
  -5  -5  11 69.2854 4.18384   1
   5  -5 -11 64.4367 4.26542   1
  -6  -5 -11 15.6314 2.35816   2
  -6  -5  11 16.7561 2.64681   1
  -6   5 -11 14.9517 2.47472   3
   6  -5 -11 19.0182 2.86736   1
  -7  -5 -11 1.33250 1.27356   2
  -7  -5  11 3.13436 1.75109   1
   7  -5 -11 2.14184 1.58403   1
  -7   5 -11 0.19462 1.35893   3
  -8  -5 -11 19.7405 2.93146   2
   8  -5 -11 21.5895 3.47021   1
  -8   5 -11 17.8256 3.02537   3
  -8  -5  11 14.9035 2.76980   1
  -9  -5 -11 8.44472 2.27752   2
  -9  -5  11 11.9368 2.70200   1
  -9   5 -11 10.9164 2.52210   3
   9  -5 -11 6.49121 2.25780   1
 -10  -5 -11 3.72049 2.07238   2
 -10  -5  11 2.96109 2.00751   1
 -10   5 -11 7.07907 2.43079   3
  10  -5 -11 3.63577 2.16352   1
 -11  -5 -11 0.84455 1.65571   2
 -11   5 -11 1.33576 2.01886   3
 -11  -5  11 3.59901 1.97208   1
  11  -5 -11 2.24525 2.43166   1
   0  -6 -11 46.1029 2.93958   1
   0  -6  11 53.1436 3.12542   1
   0   6 -11 48.5157 2.84147   3
   0  -6 -11 51.1079 2.84633   2
   1  -6  11 87.7506 3.90202   1
  -1  -6 -11 91.3823 3.83224   2
  -1  -6 -11 96.8783 4.00088   1
   1  -6 -11 92.2860 3.66367   2
  -1   6 -11 85.9203 3.90561   3
  -1  -6  11 94.5491 4.27148   1
  -1   6 -11 92.2144 3.55127   2
   1  -6 -11 92.2452 4.31404   1
  -2  -6 -11 125.317 4.84577   2
  -2  -6 -11 129.928 4.69903   1
   2  -6  11 138.727 4.89654   1
  -2   6 -11 147.210 4.38789   2
  -2  -6  11 123.901 5.21266   1
  -2   6 -11 137.917 5.20053   3
   2  -6 -11 140.754 5.57173   1
   2  -6 -11 135.170 4.41381   2
  -3  -6 -11 1.98021 0.97596   1
   3  -6  11 2.85178 1.13574   1
  -3  -6 -11 2.35291 1.12110   2
   3  -6 -11 2.84797 1.27473   1
  -3   6 -11 2.43231 1.25336   3
  -3  -6  11 1.58563 1.19236   1
  -4  -6 -11 49.3791 3.36450   2
   4  -6  11 62.9471 3.20027   1
   4  -6 -11 58.4738 3.97491   1
  -4   6 -11 53.3935 3.58855   3
  -4  -6  11 61.8047 3.86500   1
  -5  -6 -11 63.0532 3.89984   2
  -5   6 -11 57.4583 3.76424   3
   5  -6 -11 53.8373 4.06372   1
  -5  -6  11 56.6254 3.87397   1
  -6  -6 -11 14.4886 2.39774   2
  -6   6 -11 14.6441 2.47598   3
   6  -6 -11 15.3549 2.81504   1
  -6  -6  11 10.8276 2.26817   1
  -7  -6 -11 86.9279 5.03077   2
  -7  -6  11 93.6322 5.45799   1
   7  -6 -11 90.8852 5.67151   1
  -7   6 -11 91.1660 5.18802   3
  -8  -6 -11 6.54839 2.18522   2
  -8   6 -11 6.64111 2.13298   3
   8  -6 -11 7.66842 2.33324   1
  -8  -6  11 6.17104 2.28327   1
  -9  -6 -11 5.67660 2.18121   2
  -9  -6  11 5.91659 2.20737   1
  -9   6 -11 7.56876 2.37889   3
   9  -6 -11 7.65886 2.47178   1
 -10  -6 -11 3.04813 1.84117   2
  10  -6 -11 -1.3508 1.48805   1
 -10  -6  11 3.10536 2.06289   1
 -10   6 -11 0.85932 1.61585   3
   0  -7  11 1.24187 1.07321   1
   0  -7 -11 0.04755 0.93384   1
   0  -7 -11 0.19529 0.84408   2
  -1  -7 -11 5.00999 1.46011   1
   1  -7  11 6.92382 1.51013   1
  -1  -7 -11 5.75335 1.44040   2
  -1  -7  11 5.78076 1.65379   1
  -1   7 -11 3.95053 1.29583   3
   1  -7 -11 5.73426 1.34190   2
   1  -7 -11 5.23013 1.55185   1
   2  -7  11 37.2105 2.67143   1
  -2  -7 -11 35.6637 2.73496   2
  -2  -7 -11 35.1772 2.63437   1
  -2  -7  11 29.9262 3.07207   1
  -2   7 -11 37.4124 2.86510   3
   2  -7 -11 36.9450 3.52506   1
  -3  -7 -11 53.6360 3.42233   2
   3  -7  11 59.5254 3.32954   1
  -3  -7 -11 55.2790 3.14281   1
  -3   7 -11 48.1368 3.43932   3
  -3  -7  11 53.2372 3.69040   1
   3  -7 -11 51.1894 3.74063   1
  -4  -7 -11 10.2966 1.90152   2
   4  -7  11 16.0709 2.10626   1
  -4   7 -11 12.1048 2.22295   3
  -4  -7  11 12.8560 2.27787   1
  -5  -7 -11 57.7943 3.86197   2
   5  -7 -11 64.5729 4.54735   1
  -5   7 -11 59.0146 4.03057   3
  -5  -7  11 60.3586 4.12704   1
  -6  -7 -11 6.21085 1.85778   2
   6  -7 -11 2.06053 1.69447   1
  -6   7 -11 4.54260 1.72134   3
  -6  -7  11 4.91987 1.80579   1
  -7  -7 -11 2.53676 1.56357   2
  -7  -7  11 5.31895 2.04125   1
   7  -7 -11 13.0008 2.92356   1
  -7   7 -11 3.85325 1.91370   3
  -8  -7 -11 3.58200 1.76215   2
  -8   7 -11 3.74202 1.87546   3
  -8  -7  11 3.05483 1.95915   1
   8  -7 -11 6.73820 2.34121   1
  -9  -7 -11 8.44954 2.45572   2
   9  -7 -11 11.3060 2.90397   1
  -9  -7  11 8.86600 2.55383   1
  -9   7 -11 9.07795 2.69680   3
 -10  -7 -11 10.5867 2.72500   2
 -10  -7  11 9.41862 2.69626   1
 -10   7 -11 11.2837 2.80723   3
  10  -7 -11 11.8629 3.24874   1
   0  -8  11 329.990 9.71205   1
   0  -8 -11 323.102 8.42251   2
   0  -8 -11 350.048 9.82201   1
  -1  -8 -11 55.6477 3.25057   2
   1  -8  11 50.7744 3.49317   1
  -1  -8 -11 52.7340 3.42606   1
   1  -8 -11 50.6102 3.58747   1
  -1   8 -11 48.2237 3.41146   3
  -1  -8  11 60.3200 3.89514   1
  -2  -8 -11 58.1970 3.49295   1
   2  -8  11 54.3640 3.50737   1
  -2  -8 -11 52.4582 3.34213   2
  -2   8 -11 57.4960 3.65947   3
   2  -8 -11 57.0667 3.88275   1
  -2  -8  11 50.2135 3.66067   1
   3  -8  11 14.0614 2.14225   1
  -3  -8 -11 14.8956 2.21815   1
  -3  -8 -11 13.1084 2.20847   2
  -3  -8  11 15.9419 2.58888   1
  -3   8 -11 16.3292 2.51365   3
   3  -8 -11 15.3802 2.54993   1
   4  -8  11 7.83202 1.78867   1
  -4  -8 -11 4.75175 1.60732   2
  -4  -8  11 9.25458 2.07513   1
  -4   8 -11 8.22638 1.87475   3
   4  -8 -11 6.80614 2.05227   1
  -5  -8 -11 2.00831 1.41684   2
   5  -8 -11 2.82684 1.73273   1
  -5  -8  11 0.00824 1.27834   1
  -5   8 -11 0.59162 1.39579   3
  -6  -8 -11 4.06879 1.65811   2
   6  -8 -11 4.30775 2.01188   1
  -6  -8  11 1.85571 1.55558   1
  -6   8 -11 2.34069 1.48673   3
  -7  -8 -11 44.9120 4.36263   2
  -7   8 -11 39.1965 4.16772   3
   7  -8 -11 35.3633 4.44921   1
  -7  -8  11 41.1709 4.39771   1
  -8  -8 -11 21.1513 3.23295   2
  -8   8 -11 15.8458 2.98715   3
  -8  -8  11 16.4229 2.99964   1
   8  -8 -11 17.3437 3.49241   1
  -9  -8 -11 27.6817 3.78892   2
  -9   8 -11 28.9426 3.88612   3
  -9  -8  11 34.8143 4.32939   1
   9  -8 -11 27.1516 4.31991   1
   0  -9 -11 8.05340 2.03205   1
   0  -9  11 9.50415 2.04602   1
  -1  -9 -11 86.5787 4.64571   1
   1  -9  11 96.4189 4.96871   1
  -1  -9 -11 87.8883 4.18897   2
   1  -9 -11 94.4239 5.07452   1
  -1  -9  11 98.7156 5.16044   1
   2  -9  11 33.2324 3.27750   1
  -2  -9 -11 39.2978 3.01799   2
  -2  -9 -11 35.6145 3.39985   1
  -2  -9  11 37.2719 3.77834   1
   2  -9 -11 38.0172 3.91723   1
  -2   9 -11 31.5041 3.24576   3
  -3  -9 -11 22.3602 2.77617   2
  -3  -9 -11 32.7690 3.29806   1
   3  -9  11 28.2646 3.12177   1
  -3  -9  11 26.6349 3.22189   1
   3  -9 -11 31.9339 3.69044   1
  -3   9 -11 27.1740 3.20751   3
  -4  -9 -11 4.76384 1.65369   2
   4  -9  11 4.45900 1.57822   1
   4  -9 -11 6.80096 2.11133   1
  -4   9 -11 3.25705 1.67784   3
  -4  -9  11 1.89877 1.57224   1
  -5  -9 -11 10.9560 2.22212   2
   5  -9 -11 9.58948 2.52344   1
  -5   9 -11 11.6478 2.36646   3
  -5  -9  11 14.1249 2.58135   1
  -6  -9 -11 15.8129 2.73845   2
   6  -9 -11 17.5011 3.38417   1
  -6   9 -11 15.8207 2.89946   3
  -6  -9  11 14.4856 2.78115   1
  -7  -9 -11 5.68763 1.97627   2
  -7   9 -11 12.7391 2.79036   3
   7  -9 -11 14.1643 3.14018   1
  -7  -9  11 11.1065 2.65778   1
  -8  -9 -11 8.32421 2.44949   2
  -8   9 -11 4.37030 2.07876   3
  -8  -9  11 3.74456 2.17634   1
   8  -9 -11 5.01133 2.34347   1
   0 -10 -11 11.1453 2.30120   1
   0 -10  11 10.6811 2.23402   1
   1 -10  11 19.7162 2.87200   1
  -1 -10 -11 24.8098 3.22954   1
   1 -10 -11 23.4958 3.27892   1
  -1 -10  11 18.2935 2.81467   1
  -2 -10 -11 1.61559 1.34029   1
   2 -10  11 -0.1874 1.26421   1
   2 -10 -11 1.96414 1.71121   1
  -2 -10  11 5.37553 1.86550   1
   3 -10  11 3.74452 1.62114   1
  -3 -10 -11 4.06260 1.63561   1
  -3 -10 -11 0.51437 1.31335   2
  -3 -10  11 3.23528 1.72086   1
  -3  10 -11 0.08049 1.33524   3
   3 -10 -11 2.97784 1.79568   1
   4 -10  11 3.13166 1.58903   1
  -4 -10 -11 6.43955 1.76663   2
  -4  10 -11 2.41446 1.65871   3
  -4 -10  11 1.35393 1.42728   1
   4 -10 -11 3.90966 1.97692   1
  -5 -10 -11 18.6070 2.94758   2
  -5  10 -11 18.2514 2.88331   3
   5 -10 -11 27.8934 3.83457   1
  -5 -10  11 22.0691 3.25805   1
  -6 -10 -11 21.9311 3.24238   2
   6 -10 -11 16.7759 3.47488   1
  -6  10 -11 11.3328 2.75137   3
  -6 -10  11 15.7272 2.97863   1
  -7 -10 -11 3.21798 1.93553   2
  -7 -10  11 4.42401 2.12137   1
  -7  10 -11 2.41055 1.91565   3
   7 -10 -11 6.55147 2.58515   1
  -8 -10 -11 6.22729 2.41436   2
   0 -11  11 68.9106 4.70768   1
   0 -11 -11 73.3954 4.81495   1
  -1 -11 -11 8.87081 2.22280   1
   1 -11  11 6.60339 2.10520   1
  -1 -11  11 1.73473 1.61357   1
   1 -11 -11 7.17684 2.17821   1
  -2 -11 -11 3.04851 1.82632   1
   2 -11  11 2.45847 1.59641   1
  -2 -11  11 1.21961 1.62611   1
   2 -11 -11 2.00450 1.66071   1
  -3 -11 -11 37.3681 3.86710   1
   3 -11  11 33.4200 3.70422   1
   3 -11 -11 31.5242 4.04960   1
  -3 -11  11 26.3872 3.53361   1
  -4 -11 -11 16.7960 2.73238   2
   4 -11  11 18.6960 2.88410   1
  -4 -11  11 10.1389 2.52738   1
   4 -11 -11 17.7673 3.21959   1
  -4  11 -11 9.05184 2.33696   3
  -5 -11 -11 13.9408 2.64492   2
  -5  11 -11 22.4101 3.44644   3
  -5 -11  11 21.1825 3.46035   1
   5 -11 -11 27.9828 4.13287   1
  -6 -11 -11 9.58475 2.38108   2
  -6  11 -11 5.02840 2.25600   3
   6 -11 -11 5.54454 2.46090   1
  -6 -11  11 9.54336 2.62071   1
  -7 -11 -11 11.4647 2.78495   2
   0 -12  11 26.0477 3.69415   1
   0 -12 -11 22.3109 3.38033   1
   1 -12  11 10.0128 2.58545   1
  -1 -12 -11 8.97535 2.51110   1
   1 -12 -11 10.5408 2.79169   1
  -1 -12  11 16.5020 3.06736   1
   2 -12  11 1.57923 1.68815   1
  -2 -12 -11 5.82982 2.12819   1
  -2 -12  11 0.26259 1.55686   1
   2 -12 -11 4.52892 2.16254   1
  -3 -12 -11 -1.4305 1.52668   1
   3 -12  11 3.92632 1.78858   1
  -3 -12  11 -0.8541 1.47077   1
   3 -12 -11 1.16735 1.71472   1
   4 -12  11 1.21054 1.72876   1
  -4 -12  11 4.07883 1.96998   1
   4 -12 -11 1.82419 1.91088   1
  -6 -12 -11 14.9284 3.02998   2
   0 -13 -11 2.98716 1.87275   1
   0 -13  11 5.91001 2.37190   1
  -1 -13 -11 5.01391 2.06074   1
   1 -13  11 6.31572 2.37896   1
  -1 -13  11 6.88577 2.45119   1
   1 -13 -11 2.36148 2.02980   1
  -2 -13 -11 10.6475 2.85173   1
   2 -13  11 10.1845 2.62339   1
   2 -13 -11 9.11588 2.65348   1
  -2 -13  11 8.40620 2.52469   1
   3 -13  11 0.42987 1.65479   1
   0   0 -12 364.075 8.39538   2
   0   0 -12 354.408 7.91091   1
   1   0 -12 414.286 9.39023   2
   1   0 -12 430.059 9.56413   1
  -1   0 -12 416.055 9.39206   2
   1   0  12 421.185 8.52619   1
   1   0 -12 422.250 7.82564   3
  -2   0 -12 238.952 6.50872   2
   2   0 -12 250.165 6.94557   1
   2   0  12 250.706 4.87739   1
   2   0 -12 254.794 6.61824   2
   3   0 -12 163.099 5.11462   2
  -3   0 -12 160.613 5.09429   2
   3   0 -12 168.172 5.74459   1
   4   0 -12 8.28897 1.43315   2
  -4   0 -12 7.22800 1.37443   2
   4   0 -12 7.40192 1.63371   1
  -5   0 -12 21.8808 2.28828   2
   5   0 -12 19.0796 2.58869   1
   6   0 -12 0.24383 1.04655   1
  -6   0 -12 0.31140 0.97138   2
   7   0 -12 34.0790 3.74587   1
  -7   0 -12 35.9005 3.23896   2
  -8   0 -12 7.72703 1.79112   2
   8   0 -12 6.57570 2.08850   1
  -9   0 -12 34.0075 3.42589   2
   9   0 -12 32.9265 4.02595   1
  10   0 -12 3.95862 2.08800   1
 -10   0 -12 4.79094 1.88415   2
 -12   0  12 3.08300 2.13674   1
   0  -1  12 55.8299 2.53543   1
   0  -1 -12 53.9126 2.43748   1
   0   1 -12 55.1627 2.26060   3
   0  -1 -12 55.3509 2.85975   2
   0   1 -12 57.5653 2.87653   2
   1   1 -12 87.8579 3.49137   2
   1   1 -12 86.1420 2.47658   3
   1  -1  12 84.3531 2.76767   1
  -1  -1 -12 87.8055 2.80106   1
  -1  -1 -12 86.3553 3.54847   2
  -1   1 -12 92.3989 3.65343   2
   1  -1 -12 87.4920 3.46723   1
  -1  -1  12 98.3537 3.72643   1
   1  -1 -12 90.0794 3.52830   2
  -1   1 -12 91.1090 3.31050   3
   2  -1  12 128.833 3.09552   1
   2   1 -12 130.881 4.63462   1
  -2  -1 -12 131.826 3.05343   1
  -2  -1 -12 127.255 4.41112   2
   2   1 -12 128.180 4.47013   2
  -2   1 -12 133.365 4.38038   2
   2  -1 -12 132.298 4.73584   1
   2  -1 -12 135.737 4.41398   2
  -3  -1 -12 173.459 5.38399   2
   3   1 -12 170.492 5.81095   1
   3   1 -12 167.837 5.33106   2
  -3   1 -12 172.877 5.25961   2
   3  -1 -12 177.023 5.99644   1
   3  -1 -12 172.210 5.21186   2
   4   1 -12 119.428 4.46559   2
   4   1 -12 111.239 4.85377   1
  -4  -1 -12 115.985 4.41612   2
   4  -1 -12 116.165 5.05870   1
   4  -1 -12 113.381 4.21553   2
  -4   1 -12 105.261 4.11718   2
   5   1 -12 19.7235 2.59785   1
  -5  -1 -12 23.2573 2.44861   2
   5  -1 -12 25.0636 2.34889   2
   5  -1 -12 20.6154 2.66788   1
  -5   1 -12 23.5039 2.24733   2
   6   1 -12 17.6461 2.59746   1
  -6  -1 -12 20.9082 2.42658   2
   6  -1 -12 19.8951 2.77532   1
  -6   1 -12 19.5985 2.25584   2
   7   1 -12 108.842 5.68470   1
  -7  -1 -12 115.317 5.01688   2
  -7   1 -12 113.114 4.71945   2
   7  -1 -12 99.5736 5.52761   1
   8   1 -12 15.0134 2.82569   1
  -8  -1 -12 18.6215 2.57237   2
   8  -1 -12 12.9246 2.72928   1
  -8   1 -12 16.3517 2.31463   2
  -9  -1 -12 29.7915 3.36743   2
  -9   1 -12 31.6142 3.17587   2
   9  -1 -12 24.6550 3.60616   1
 -10  -1 -12 3.26434 1.72203   2
  10  -1 -12 3.78713 2.05067   1
 -10   1 -12 2.51317 1.95567   3
 -10  -1  12 -0.4510 1.55115   1
 -11  -1 -12 20.0098 3.14577   2
 -11  -1  12 16.5074 3.46443   1
  11  -1 -12 14.5993 3.24027   1
 -11   1 -12 19.6792 3.59734   3
 -12  -1  12 2.41495 2.16360   1
  12  -1 -12 -1.3849 1.80384   1
   0  -2 -12 20.4629 2.02225   2
   0   2 -12 19.9978 1.92833   2
   0  -2  12 19.0867 1.74679   1
   0   2 -12 23.1642 1.62679   3
   0  -2 -12 21.4842 1.69684   1
   1   2 -12 16.3342 1.79336   2
   1  -2  12 17.9005 1.36852   1
  -1  -2 -12 19.6340 1.44513   1
   1   2 -12 16.5113 1.24855   3
  -1  -2 -12 16.7917 1.82769   2
  -1   2 -12 17.6232 1.81936   2
   1  -2 -12 17.0344 1.85935   1
  -1  -2  12 17.2143 1.82374   1
  -1   2 -12 17.6440 1.71681   3
   1  -2 -12 20.2800 1.93906   2
  -2  -2 -12 122.605 4.33891   2
   2  -2  12 120.332 3.25909   1
   2   2 -12 121.567 4.35499   2
  -2  -2 -12 119.974 3.21916   1
  -2   2 -12 119.208 4.20643   2
  -2  -2  12 123.304 4.61108   1
   2  -2 -12 124.426 4.66259   1
  -2   2 -12 116.417 4.27213   3
   2  -2 -12 125.499 4.21312   2
   3   2 -12 6.34987 1.32656   2
  -3  -2 -12 6.87339 0.66102   1
  -3  -2 -12 8.13843 1.43709   2
   3  -2 -12 6.41045 1.52007   1
  -3   2 -12 5.83279 1.28113   2
   3  -2 -12 6.09331 1.21176   2
  -3   2 -12 6.22897 1.38971   3
  -3  -2  12 5.62209 1.49277   1
  -4  -2 -12 59.9343 3.22918   2
   4  -2 -12 62.2176 2.99973   2
  -4   2 -12 59.0690 2.98581   2
  -4   2 -12 63.2944 3.50904   3
   4  -2 -12 63.3570 3.80290   1
  -4  -2  12 55.3564 3.56810   1
  -5  -2 -12 37.0142 2.71277   2
  -5   2 -12 31.5125 3.18844   3
  -5   2 -12 36.1809 2.48538   2
   5  -2 -12 36.9370 2.43306   2
   5  -2 -12 41.9124 3.79644   1
  -5  -2  12 36.9741 3.59109   1
  -6  -2 -12 29.6877 2.94316   2
   6  -2 -12 30.4087 3.45550   1
  -6   2 -12 33.9870 3.45036   3
  -6  -2  12 34.7773 3.69499   1
  -6   2 -12 36.0740 2.59155   2
  -7  -2 -12 34.3663 3.25385   2
   7  -2 -12 35.3351 3.85428   1
  -7  -2  12 43.2641 4.41024   1
  -7   2 -12 32.5739 2.85924   2
  -7   2 -12 27.9317 3.30642   3
  -8  -2 -12 38.2666 3.58592   2
  -8  -2  12 40.7375 4.43671   1
   8  -2 -12 40.9859 4.41115   1
  -8   2 -12 46.0814 3.15991   2
  -8   2 -12 38.6155 4.05174   3
  -9  -2 -12 28.4963 3.26248   2
  -9  -2  12 35.2464 4.26664   1
  -9   2 -12 37.5725 4.21714   3
   9  -2 -12 28.5375 4.03081   1
 -10  -2 -12 1.84163 1.59492   2
  10  -2 -12 -0.0144 1.67056   1
 -10   2 -12 3.21575 1.83301   3
 -10  -2  12 2.88182 2.05832   1
 -11  -2 -12 17.7923 2.94415   2
 -11   2 -12 19.8008 3.53201   3
 -11  -2  12 14.5720 3.19960   1
  11  -2 -12 17.1928 3.68149   1
 -12  -2 -12 8.93869 2.48941   2
   0  -3  12 564.065 11.9505   1
   0  -3 -12 567.689 12.0432   1
   0  -3 -12 567.017 11.9052   2
   0   3 -12 569.591 11.3565   3
   0   3 -12 570.293 11.8812   2
   1  -3  12 114.157 3.73364   1
  -1  -3 -12 123.484 4.31187   2
   1   3 -12 124.239 4.31298   2
   1   3 -12 116.088 3.48076   3
   1  -3 -12 115.258 4.30219   1
  -1   3 -12 120.565 4.08821   3
   1  -3 -12 113.690 4.12866   2
  -1   3 -12 117.986 4.11945   2
  -1  -3  12 118.196 4.26706   1
  -2  -3 -12 18.4223 1.97645   2
   2  -3  12 20.5238 1.51479   1
  -2  -3 -12 20.4379 1.46064   1
   2   3 -12 26.4769 2.36600   2
  -2   3 -12 23.7405 2.09754   2
  -2   3 -12 28.0645 2.43572   3
  -2  -3  12 25.0337 2.45678   1
   2  -3 -12 29.0006 2.67113   1
   2  -3 -12 27.7897 2.06183   2
  -3  -3 -12 23.3962 1.38567   1
   3  -3  12 24.2340 1.44799   1
  -3  -3 -12 24.4463 2.34049   2
   3   3 -12 22.9179 2.27803   2
  -3   3 -12 27.4316 2.09624   2
  -3   3 -12 20.3602 2.21367   3
  -3  -3  12 26.8249 2.67720   1
   3  -3 -12 24.4877 2.13093   2
   3  -3 -12 23.3393 2.56020   1
  -4  -3 -12 9.56045 1.72372   2
  -4   3 -12 9.94738 1.74005   3
   4  -3 -12 11.0060 2.01873   1
  -4  -3  12 8.76876 1.77228   1
   4  -3 -12 7.06553 1.28607   2
  -4   3 -12 9.62441 1.50935   2
  -5  -3 -12 68.9662 3.80260   2
   5  -3 -12 60.2462 3.99782   1
  -5  -3  12 77.4916 4.45132   1
   5  -3 -12 65.6838 3.14185   2
  -5   3 -12 69.6201 3.94242   3
  -5   3 -12 65.0327 3.16269   2
  -6  -3 -12 18.8792 2.44270   2
  -6  -3  12 17.7660 2.75879   1
  -6   3 -12 22.3924 2.87138   3
  -6   3 -12 21.5540 2.25922   2
   6  -3 -12 18.9955 2.92352   1
  -7  -3 -12 52.9646 3.61633   2
   7  -3 -12 50.8712 4.70432   1
  -7  -3  12 49.3886 4.00187   1
  -8  -3 -12 28.3729 3.26991   2
  -8   3 -12 26.7011 3.47666   3
   8  -3 -12 25.4700 3.62924   1
  -8  -3  12 27.0228 3.60423   1
  -9  -3 -12 19.6989 2.94516   2
  -9   3 -12 21.1812 3.25322   3
  -9  -3  12 31.0231 4.16479   1
   9  -3 -12 22.0586 3.60444   1
 -10  -3 -12 4.71036 1.89831   2
 -10  -3  12 12.1712 3.06676   1
  10  -3 -12 7.30065 2.57337   1
 -10   3 -12 5.42921 2.08855   3
 -11  -3 -12 9.34277 2.36999   2
 -11  -3  12 6.29616 2.41431   1
  11  -3 -12 2.92465 2.29656   1
 -11   3 -12 5.22748 2.12687   3
 -12  -3 -12 -1.7218 1.57315   2
   0   4 -12 167.212 5.16453   2
   0  -4 -12 170.471 5.29018   1
   0   4 -12 172.404 5.02675   3
   0  -4 -12 169.013 5.25560   2
   0  -4  12 168.903 5.26115   1
  -1  -4 -12 35.6099 2.20540   1
   1  -4  12 35.5020 2.17215   1
  -1  -4 -12 35.9214 2.45179   2
   1   4 -12 36.5485 2.01235   3
   1   4 -12 37.7757 2.47264   2
  -1   4 -12 35.5578 2.27641   2
   1  -4 -12 25.6083 2.53095   1
  -1   4 -12 34.7089 2.29956   3
   1  -4 -12 33.7162 2.30310   2
  -1  -4  12 28.5883 2.28344   1
  -2  -4 -12 33.7879 1.98172   1
   2   4 -12 36.5878 2.47323   2
   2  -4  12 37.2539 2.08975   1
  -2  -4 -12 39.8607 2.64021   2
  -2  -4  12 32.3997 2.46592   1
  -2   4 -12 33.1072 2.37501   3
  -2   4 -12 32.8561 2.19883   2
   2  -4 -12 31.9396 2.20243   2
   2  -4 -12 29.4032 2.85709   1
   3  -4  12 8.08496 1.13913   1
  -3  -4 -12 4.54813 1.34459   2
  -3  -4 -12 9.14203 1.17335   1
  -3   4 -12 6.40940 1.45072   3
  -3   4 -12 7.08409 1.32761   2
   3  -4 -12 7.07581 1.28500   2
   3  -4 -12 11.2372 1.98342   1
  -3  -4  12 5.36955 1.44317   1
  -4  -4 -12 3.94277 1.34826   2
   4  -4 -12 6.58663 1.22058   2
  -4   4 -12 5.37691 1.43913   3
  -4  -4  12 8.07837 1.76733   1
  -4   4 -12 5.55846 1.31311   2
   4  -4 -12 6.60534 1.74540   1
  -5  -4 -12 111.243 4.87943   2
  -5   4 -12 114.541 5.20119   3
   5  -4 -12 109.661 5.50215   1
  -5  -4  12 113.369 5.41959   1
  -5   4 -12 116.733 4.24097   2
   5  -4 -12 117.309 4.16266   2
  -6  -4 -12 2.07455 1.29975   2
   6  -4 -12 1.48046 1.53250   1
  -6   4 -12 1.25949 1.17161   3
  -6  -4  12 1.44759 1.32275   1
  -7  -4 -12 1.45355 1.32666   2
   7  -4 -12 0.99198 1.40377   1
  -7   4 -12 -0.1360 1.19041   3
  -7  -4  12 1.97890 1.56006   1
  -8  -4 -12 22.9155 3.10981   2
  -8  -4  12 23.1342 3.41551   1
  -8   4 -12 25.4688 3.46972   3
   8  -4 -12 19.7678 3.25850   1
  -9  -4 -12 6.76451 2.17389   2
  -9  -4  12 8.53754 2.42914   1
   9  -4 -12 11.9673 2.91530   1
  -9   4 -12 15.3552 2.92654   3
 -10  -4 -12 18.1192 3.05860   2
 -10   4 -12 18.8981 3.40983   3
  10  -4 -12 9.15649 2.79431   1
 -10  -4  12 17.3000 3.34826   1
 -11  -4 -12 3.50921 1.93785   2
  11  -4 -12 5.60359 2.66689   1
 -11  -4  12 6.09898 2.37802   1
 -11   4 -12 4.72593 2.19525   3
   0  -5 -12 -0.0488 0.84214   2
   0  -5 -12 1.15917 0.91109   1
   0  -5  12 2.33544 0.98034   1
   0   5 -12 1.33872 0.91729   2
   0   5 -12 1.07996 0.82700   3
  -1  -5 -12 73.8586 3.44903   2
   1  -5  12 71.6961 3.35265   1
  -1  -5 -12 77.4727 3.44593   1
   1   5 -12 75.1248 3.46811   2
  -1   5 -12 83.7682 3.40905   2
  -1   5 -12 78.2841 3.56003   3
   1  -5 -12 84.1560 3.91359   1
   1  -5 -12 77.1283 3.38912   2
  -1  -5  12 82.1168 3.85750   1
   2  -5  12 42.3736 2.51555   1
  -2  -5 -12 42.3505 2.82673   2
  -2  -5 -12 41.0070 2.41529   1
  -2  -5  12 41.0107 2.86335   1
  -2   5 -12 41.8573 2.73111   3
  -2   5 -12 38.9573 2.40063   2
   2  -5 -12 30.0114 3.00503   1
   2  -5 -12 40.3363 2.53526   2
  -3  -5 -12 87.2631 4.08204   2
  -3  -5 -12 91.5847 3.44097   1
   3  -5  12 89.9169 3.53575   1
  -3  -5  12 88.4719 4.36359   1
  -3   5 -12 97.0080 3.54303   2
   3  -5 -12 89.9947 4.58216   1
  -3   5 -12 89.2193 4.20917   3
   3  -5 -12 94.5223 3.59828   2
  -4  -5 -12 16.0614 2.18384   2
  -4   5 -12 18.4614 1.88107   2
  -4   5 -12 18.2301 2.46693   3
  -4  -5  12 13.0235 2.19884   1
   4  -5 -12 15.7550 2.60833   1
   4  -5 -12 17.7621 1.81060   2
  -5  -5 -12 60.3281 3.71183   2
  -5   5 -12 51.5391 3.57819   3
   5  -5 -12 51.7825 3.90242   1
  -5  -5  12 53.4804 3.73985   1
  -6  -5 -12 27.2453 3.03164   2
  -6   5 -12 34.2974 3.53324   3
   6  -5 -12 30.8777 3.65861   1
  -6  -5  12 28.4186 3.35304   1
  -7  -5 -12 9.61844 2.20905   2
  -7  -5  12 7.25551 2.03990   1
   7  -5 -12 6.23264 2.04487   1
  -7   5 -12 11.2684 2.41641   3
  -8  -5 -12 2.63984 1.59617   2
   8  -5 -12 2.18915 1.66637   1
  -8  -5  12 3.24217 1.82605   1
  -8   5 -12 -0.3259 1.41180   3
  -9  -5 -12 7.37820 2.19227   2
  -9   5 -12 6.49045 2.22503   3
  -9  -5  12 9.01612 2.59146   1
   9  -5 -12 7.58606 2.55684   1
 -10  -5 -12 3.38088 1.88144   2
 -10   5 -12 2.40574 1.89087   3
  10  -5 -12 5.89901 2.24629   1
 -10  -5  12 5.34229 2.34724   1
 -11  -5 -12 15.4484 3.00863   2
  11  -5 -12 13.0916 3.34418   1
 -11  -5  12 8.64575 2.72021   1
   0   6 -12 82.8983 3.70382   3
   0  -6 -12 80.1632 3.93507   1
   0  -6  12 83.7828 4.00758   1
   0   6 -12 80.3421 3.60408   2
   0  -6 -12 74.1193 3.51843   2
   1  -6  12 0.57445 0.97353   1
  -1  -6 -12 1.69019 1.05313   1
  -1  -6 -12 -0.1673 0.83554   2
  -1   6 -12 -0.5244 0.93999   3
   1  -6 -12 1.10636 0.93723   2
  -1   6 -12 0.26093 0.78275   2
   1  -6 -12 0.46811 1.02255   1
  -1  -6  12 0.15504 0.92298   1
   2  -6  12 57.3116 3.07956   1
  -2  -6 -12 50.7040 2.86654   1
  -2  -6 -12 52.4203 3.11645   2
  -2   6 -12 58.2680 2.86161   2
  -2  -6  12 58.2830 3.58647   1
  -2   6 -12 50.4532 3.22972   3
   2  -6 -12 53.0594 3.43887   1
   2  -6 -12 50.2783 2.81502   2
  -3  -6 -12 26.7586 2.75564   2
   3  -6  12 29.6443 2.26213   1
  -3  -6 -12 32.4495 2.29016   1
  -3   6 -12 31.8669 2.19959   2
  -3  -6  12 29.7189 3.08728   1
  -3   6 -12 35.5309 3.20051   3
  -4  -6 -12 4.50794 1.49399   2
  -4  -6  12 6.27530 1.71171   1
   4  -6 -12 8.21855 2.12083   1
  -4   6 -12 5.06337 1.66527   3
  -5  -6 -12 10.0438 1.94134   2
   5  -6 -12 9.91696 2.33340   1
  -5  -6  12 8.99956 2.06537   1
  -5   6 -12 9.24461 2.00066   3
  -6  -6 -12 24.5203 3.09191   2
  -6   6 -12 22.4050 3.02429   3
   6  -6 -12 30.0476 3.82311   1
  -6  -6  12 28.2952 3.50261   1
  -7  -6 -12 43.5380 4.17184   2
  -7   6 -12 36.4160 3.98336   3
  -7  -6  12 38.8787 4.11456   1
  -8  -6 -12 22.9772 3.22736   2
  -8   6 -12 19.5707 3.25944   3
  -8  -6  12 23.1745 3.46412   1
   8  -6 -12 23.0348 3.73033   1
  -9  -6 -12 9.23454 2.47574   2
  -9   6 -12 4.51885 2.21025   3
  -9  -6  12 17.6429 3.21468   1
   9  -6 -12 14.9036 3.12375   1
 -10  -6 -12 2.45632 1.94429   2
  10  -6 -12 1.45131 1.87170   1
 -10   6 -12 2.51249 1.95379   3
 -10  -6  12 -0.9803 1.62999   1
   0  -7  12 11.6262 1.89754   1
   0  -7 -12 7.60506 1.69444   1
   0  -7 -12 11.0140 1.76988   2
  -1  -7 -12 2.86980 1.20755   2
  -1  -7 -12 1.53393 1.19198   1
   1  -7  12 3.18619 1.32491   1
   1  -7 -12 1.61998 1.10773   2
  -1  -7  12 2.68384 1.32379   1
  -1   7 -12 2.32851 1.22377   3
   1  -7 -12 3.21315 1.44859   1
   2  -7  12 153.709 5.55641   1
  -2  -7 -12 143.080 5.30446   1
  -2  -7 -12 132.226 5.27474   2
  -2   7 -12 143.517 5.64875   3
   2  -7 -12 145.938 6.06757   1
  -2  -7  12 142.045 5.92899   1
  -3  -7 -12 6.54015 1.52026   1
   3  -7  12 6.74907 1.52039   1
  -3  -7 -12 4.10611 1.32633   2
   3  -7 -12 11.2046 2.18099   1
  -3  -7  12 5.54877 1.70081   1
  -3   7 -12 11.1212 2.04735   3
  -4  -7 -12 5.57501 1.69212   2
  -4   7 -12 11.9401 2.17734   3
  -4  -7  12 8.93943 2.06024   1
   4  -7 -12 8.32591 2.16028   1
  -5  -7 -12 3.09305 1.57279   2
  -5  -7  12 3.38129 1.57174   1
   5  -7 -12 6.82139 2.11753   1
  -5   7 -12 4.44913 1.67608   3
  -6  -7 -12 1.79078 1.35044   2
  -6  -7  12 4.77710 1.75635   1
   6  -7 -12 4.67756 1.77058   1
  -6   7 -12 0.70705 1.22056   3
  -7  -7 -12 6.43719 1.89187   2
  -7  -7  12 4.80562 2.00818   1
  -7   7 -12 -0.8428 1.24496   3
   7  -7 -12 8.46663 2.36962   1
  -8  -7 -12 50.8035 4.71843   2
   8  -7 -12 52.9867 5.39018   1
  -8   7 -12 55.4268 5.08451   3
  -8  -7  12 59.4845 4.70247   1
  -9  -7 -12 31.8604 3.97883   2
  -9   7 -12 27.4911 3.91881   3
   9  -7 -12 25.0475 4.08093   1
  -9  -7  12 36.7733 4.46043   1
  10  -7 -12 14.2512 3.55125   1
 -10  -7  12 11.8215 2.95664   1
   0  -8  12 0.03561 1.01096   1
   0  -8 -12 0.27493 1.12965   1
   0  -8 -12 0.03770 0.92029   2
  -1  -8 -12 20.5105 2.36882   2
   1  -8  12 22.1522 2.75263   1
  -1  -8 -12 20.2130 2.58097   1
  -1   8 -12 26.0846 2.85361   3
   1  -8 -12 24.0313 2.93682   1
  -1  -8  12 16.8665 2.50243   1
   2  -8  12 11.9929 2.09595   1
  -2  -8 -12 14.6333 2.22763   1
  -2  -8 -12 21.4394 2.51566   2
  -2   8 -12 18.7227 2.57954   3
  -2  -8  12 15.8910 2.51782   1
   2  -8 -12 20.6165 2.90634   1
  -3  -8 -12 86.3027 4.47469   2
   3  -8  12 86.5031 4.28036   1
  -3  -8 -12 88.4235 4.28196   1
  -3   8 -12 90.3008 4.79633   3
  -3  -8  12 82.8870 4.77001   1
   3  -8 -12 92.7479 5.13136   1
  -4  -8 -12 46.2219 3.49895   2
  -4  -8  12 49.5900 3.87172   1
  -4   8 -12 42.9619 3.89305   3
  -5  -8 -12 4.75472 1.61559   2
  -5  -8  12 5.94514 1.93959   1
  -5   8 -12 1.81013 1.44094   3
   5  -8 -12 4.48313 2.05075   1
  -6  -8 -12 11.3515 2.40540   2
  -6  -8  12 6.45584 2.07429   1
   6  -8 -12 11.0705 2.74189   1
  -6   8 -12 11.0590 2.36695   3
  -7  -8 -12 31.2425 3.83760   2
  -7   8 -12 28.9539 3.71918   3
  -7  -8  12 23.9887 3.53932   1
   7  -8 -12 33.7403 4.34117   1
  -8  -8 -12 12.7587 2.71404   2
   8  -8 -12 15.0264 3.25351   1
  -8  -8  12 16.0120 3.13831   1
  -8   8 -12 11.1513 2.64193   3
  -9  -8 -12 2.39020 1.85156   2
  -9   8 -12 8.08326 2.55615   3
  -9  -8  12 2.56035 1.83887   1
   9  -8 -12 2.56112 2.29619   1
   0  -9  12 17.7545 2.73216   1
   0  -9 -12 22.2244 2.96146   1
  -1  -9 -12 10.1214 1.87736   2
  -1  -9 -12 7.92794 2.00980   1
   1  -9  12 8.62514 1.89895   1
   1  -9 -12 13.0731 2.46237   1
  -1  -9  12 9.75972 2.15742   1
  -2  -9 -12 95.4237 4.61569   2
  -2  -9 -12 97.9228 4.86645   1
   2  -9  12 99.0316 4.96498   1
  -2   9 -12 80.5857 4.53951   3
  -2  -9  12 91.3858 5.11895   1
   2  -9 -12 98.1499 5.42443   1
   3  -9  12 27.1592 3.06913   1
  -3  -9 -12 29.8296 3.18751   2
  -3  -9 -12 35.4004 3.41237   1
   3  -9 -12 36.8078 4.00306   1
  -3   9 -12 34.0642 3.51696   3
  -3  -9  12 34.3982 3.76753   1
  -4  -9 -12 8.18330 2.04777   2
   4  -9 -12 9.58459 2.52544   1
  -4  -9  12 12.4410 2.48327   1
  -4   9 -12 9.92618 2.28877   3
  -5  -9 -12 18.6464 2.80378   2
  -5  -9  12 20.9796 3.15428   1
  -5   9 -12 22.9228 3.21548   3
   5  -9 -12 24.0863 3.74495   1
  -6  -9 -12 -0.4134 1.38785   2
  -6   9 -12 2.91737 1.81443   3
   6  -9 -12 3.66315 2.20106   1
  -6  -9  12 2.28358 1.73767   1
  -7  -9 -12 41.3270 4.48981   2
   7  -9 -12 33.1096 4.42764   1
  -7  -9  12 45.7002 4.76772   1
  -7   9 -12 28.2867 3.67374   3
  -8  -9 -12 11.2954 2.76053   2
   8  -9 -12 12.8408 3.19910   1
  -8   9 -12 10.6436 2.73495   3
  -8  -9  12 5.34859 2.39794   1
   0 -10  12 5.15947 1.72136   1
   0 -10 -12 2.22124 1.62019   1
   1 -10  12 80.1444 4.80357   1
  -1 -10 -12 74.5937 4.53743   1
   1 -10 -12 74.8051 4.84055   1
  -1 -10  12 68.9793 4.68971   1
   2 -10  12 10.2936 2.07815   1
  -2 -10 -12 14.0519 2.45053   1
  -2 -10  12 10.9037 2.38188   1
   2 -10 -12 12.2137 2.73662   1
  -3 -10 -12 3.29434 1.72904   1
   3 -10  12 5.48161 1.88572   1
  -3 -10 -12 7.50005 1.89941   2
  -3  10 -12 4.67945 1.74729   3
  -3 -10  12 3.68804 1.78841   1
   3 -10 -12 2.93119 1.81669   1
  -4 -10 -12 1.07158 1.52019   2
  -4 -10  12 1.09878 1.49118   1
  -4  10 -12 1.01875 1.53882   3
   4 -10 -12 0.23536 1.50830   1
  -5 -10 -12 6.49335 2.09266   2
  -5 -10  12 7.00351 2.25208   1
  -5  10 -12 6.09243 2.08577   3
   5 -10 -12 4.41123 2.20416   1
  -6 -10 -12 16.4142 2.89459   2
   6 -10 -12 17.6825 3.35654   1
  -6  10 -12 17.1940 3.09952   3
  -6 -10  12 20.0958 3.42822   1
  -7 -10 -12 6.05469 2.18938   2
  -7  10 -12 6.47727 2.34042   3
   7 -10 -12 4.25312 2.44527   1
  -7 -10  12 7.68813 2.53643   1
   0 -11  12 15.8066 2.84271   1
   0 -11 -12 15.0944 2.76918   1
  -1 -11 -12 19.4245 3.07158   1
   1 -11  12 15.4253 2.78009   1
   1 -11 -12 14.4773 2.82889   1
  -1 -11  12 14.1585 2.88132   1
   2 -11  12 2.63200 1.63223   1
  -2 -11 -12 3.30132 1.78805   1
   2 -11 -12 3.18977 2.03682   1
  -2 -11  12 5.91415 2.11634   1
   3 -11  12 3.27022 1.74000   1
   3 -11 -12 3.86088 1.92624   1
  -3 -11  12 6.93958 2.18060   1
  -4 -11 -12 8.08773 2.07861   2
   4 -11 -12 10.2219 2.74045   1
  -4 -11  12 10.7132 2.51756   1
  -4  11 -12 6.63992 2.21657   3
  -5 -11 -12 21.6400 3.26232   2
  -5  11 -12 17.6886 3.08295   3
   5 -11 -12 20.2109 3.63774   1
  -5 -11  12 15.8160 3.08785   1
  -6 -11 -12 13.0312 2.78813   2
  -6 -11  12 11.6746 2.74875   1
   6 -11 -12 11.2988 2.94613   1
  -6  11 -12 7.55130 2.37910   3
   0 -12  12 45.3185 4.71543   1
   0 -12 -12 57.4804 4.65516   1
  -1 -12 -12 24.5210 3.64302   1
   1 -12  12 22.0832 3.37785   1
  -1 -12  12 20.7774 3.37487   1
   1 -12 -12 20.9721 3.55084   1
   2 -12  12 0.49119 1.47058   1
  -2 -12 -12 -0.2585 1.60601   1
   2 -12 -12 -0.0164 1.61618   1
  -2 -12  12 0.07359 1.52715   1
   3 -12  12 18.0053 2.98483   1
  -3 -12  12 13.2595 3.00090   1
   3 -12 -12 5.80899 2.29515   1
  -4 -12  12 9.84880 2.64371   1
   4 -12 -12 11.4211 2.86777   1
  -6 -12 -12 15.2382 3.01908   2
   0 -13 -12 27.6995 3.87210   1
   0 -13  12 22.1814 3.54882   1
  -1 -13 -12 3.85602 2.04471   1
   1 -13  12 2.07574 1.98605   1
   1 -13 -12 2.59367 1.97544   1
  -1 -13  12 0.99639 1.92029   1
  -2 -13 -12 13.1903 2.92185   1
   2 -13  12 8.16149 2.52021   1
   2 -13 -12 12.7292 3.10147   1
   3 -13  12 8.10457 2.55786   1
   0   0 -13 2.02876 0.97014   2
   0   0 -13 1.98636 0.80876   1
  -1   0 -13 -0.7486 0.70525   2
   1   0  13 0.39131 0.53398   1
   1   0 -13 0.96570 0.80547   2
   1   0 -13 1.05307 0.82323   1
   1   0 -13 1.01596 0.45334   3
   2   0 -13 0.43584 0.90944   1
   2   0 -13 -0.9502 0.57775   2
   2   0  13 -0.3312 0.31543   1
  -2   0 -13 0.53674 0.81654   2
  -3   0 -13 134.680 4.74622   2
   3   0 -13 137.880 4.78682   2
   3   0 -13 142.760 5.31415   1
  -4   0 -13 37.1439 2.60267   2
   4   0 -13 33.3781 3.20817   1
   4   0 -13 37.4360 2.50941   2
   5   0 -13 45.0589 3.40673   1
  -5   0 -13 47.5805 2.91477   2
  -6   0 -13 90.9299 4.28660   2
   6   0 -13 83.6326 4.82768   1
   7   0 -13 27.0104 3.38989   1
  -7   0 -13 28.8132 2.89226   2
  -8   0 -13 28.4457 3.03492   2
   8   0 -13 31.1011 3.89995   1
  -9   0 -13 12.2206 2.28643   2
   9   0 -13 14.0105 2.90464   1
 -10   0 -13 33.5272 3.69090   2
  10   0 -13 27.8853 3.99421   1
   0  -1 -13 10.1584 1.35059   1
   0  -1  13 8.90011 1.27970   1
   0  -1 -13 10.6656 1.56914   2
   0   1 -13 6.31771 1.28203   2
   0   1 -13 8.61194 1.11294   3
   1   1 -13 165.902 3.86092   3
  -1  -1 -13 167.488 4.29185   1
   1   1 -13 161.834 5.10527   2
  -1  -1 -13 170.389 5.27832   2
   1  -1  13 156.410 4.22880   1
  -1   1 -13 172.353 4.90075   3
  -1  -1  13 158.280 5.15242   1
  -1   1 -13 164.735 5.16667   2
   1  -1 -13 155.227 5.05579   2
   1  -1 -13 158.544 5.06560   1
   2  -1  13 12.0811 0.97035   1
  -2  -1 -13 10.6141 1.61185   2
  -2  -1 -13 12.6081 0.95734   1
   2   1 -13 8.45274 1.43736   2
   2  -1 -13 8.90465 1.53803   1
   2  -1 -13 10.7381 1.54098   2
  -2   1 -13 11.3347 1.60375   3
  -2   1 -13 12.2542 1.71839   2
  -3  -1 -13 123.401 4.62820   2
   3   1 -13 121.687 4.93060   1
   3   1 -13 126.825 4.57917   2
   3  -1 -13 128.427 5.11609   1
   3  -1 -13 129.920 4.55257   2
  -3   1 -13 126.534 4.47964   2
   4   1 -13 0.00911 0.71680   2
   4   1 -13 1.33827 1.17093   1
  -4  -1 -13 1.17427 1.00873   2
   4  -1 -13 0.32207 1.03754   1
   4  -1 -13 0.37170 0.69339   2
  -4   1 -13 0.34068 0.91503   2
   5   1 -13 201.839 7.33261   1
  -5  -1 -13 199.895 6.49306   2
  -5   1 -13 210.664 6.39598   2
   5  -1 -13 206.553 7.48103   1
   5  -1 -13 219.510 6.50314   2
  -6  -1 -13 65.2341 3.73592   2
   6   1 -13 63.7961 4.20046   1
  -6   1 -13 65.2732 3.55265   2
   6  -1 -13 67.5189 4.33106   1
   7   1 -13 153.619 6.86608   1
  -7  -1 -13 141.298 5.81877   2
   7  -1 -13 145.856 6.85078   1
  -7   1 -13 150.972 5.62609   2
   8   1 -13 7.24050 2.17226   1
  -8  -1 -13 6.71001 1.81443   2
   8  -1 -13 8.03514 2.25073   1
  -8   1 -13 8.88978 1.94764   2
  -9  -1 -13 27.6434 3.32616   2
   9  -1 -13 33.5582 4.29115   1
  -9   1 -13 29.8303 3.19213   2
 -10  -1 -13 10.3351 2.36871   2
 -10   1 -13 13.6032 2.90522   3
  10  -1 -13 19.1905 3.51380   1
 -10  -1  13 12.6885 3.16698   1
 -11  -1 -13 2.11429 1.77876   2
 -11  -1  13 -1.8775 1.47999   1
 -11   1 -13 0.04983 1.70131   3
  11  -1 -13 4.94999 2.34882   1
   0  -2 -13 102.184 3.68029   1
   0   2 -13 103.118 3.39740   3
   0  -2  13 107.140 3.70436   1
   0   2 -13 104.801 3.98729   2
   0  -2 -13 106.315 4.07200   2
   1   2 -13 22.2232 2.13304   2
   1  -2  13 21.3528 1.52404   1
  -1  -2 -13 21.2157 1.56865   1
   1   2 -13 21.8049 1.38558   3
  -1  -2 -13 22.6569 2.17777   2
   1  -2 -13 22.4464 2.14937   1
  -1   2 -13 19.1593 1.80355   3
  -1  -2  13 22.9535 2.15284   1
   1  -2 -13 20.4762 2.05456   2
  -1   2 -13 20.4518 2.04752   2
   2   2 -13 72.2128 3.36440   2
   2  -2  13 77.4323 2.49099   1
  -2  -2 -13 76.8503 3.53293   2
  -2  -2 -13 74.1859 2.45285   1
  -2   2 -13 70.9674 3.34979   2
  -2   2 -13 78.0064 3.47286   3
  -2  -2  13 83.7800 3.76982   1
   2  -2 -13 70.0592 3.23173   2
   2  -2 -13 74.3629 3.58876   1
  -3  -2 -13 49.2604 2.87985   2
   3   2 -13 45.7406 2.78318   2
  -3   2 -13 51.1997 3.08259   3
   3  -2 -13 50.8945 3.19739   1
   3  -2 -13 45.4243 2.64872   2
  -3   2 -13 46.3408 2.74270   2
  -3  -2  13 48.2262 3.11873   1
  -4  -2 -13 122.394 4.79447   2
  -4   2 -13 134.232 4.64815   2
   4  -2 -13 127.845 4.49481   2
   4  -2 -13 114.961 5.26330   1
  -4  -2  13 119.776 5.38606   1
  -4   2 -13 129.111 5.18578   3
  -5  -2 -13 4.23122 1.33693   2
  -5   2 -13 12.0299 2.07907   3
   5  -2 -13 5.87191 1.70611   1
  -5  -2  13 5.16331 1.69878   1
  -5   2 -13 8.20022 1.58240   2
   5  -2 -13 10.6349 1.61810   2
  -6  -2 -13 56.6729 3.52373   2
  -6  -2  13 56.6118 4.12767   1
   6  -2 -13 63.0653 4.27458   1
  -6   2 -13 61.6704 4.07119   3
  -6   2 -13 62.1947 3.40241   2
  -7  -2 -13 3.79334 1.55832   2
  -7   2 -13 5.00646 1.60568   3
  -7  -2  13 1.43682 1.59172   1
   7  -2 -13 3.56385 1.73870   1
  -7   2 -13 3.63428 1.44007   2
  -8  -2 -13 197.672 7.39328   2
  -8  -2  13 207.778 8.77000   1
  -8   2 -13 203.870 8.22230   3
   8  -2 -13 212.251 8.77429   1
  -8   2 -13 221.262 6.99598   2
  -9  -2 -13 0.48132 1.39986   2
  -9  -2  13 -1.0121 1.43460   1
  -9   2 -13 0.19394 1.58239   3
   9  -2 -13 2.84372 1.82541   1
 -10  -2 -13 41.6872 4.19283   2
 -10   2 -13 42.8636 4.84974   3
 -10  -2  13 35.4152 4.60999   1
  10  -2 -13 36.4323 4.60394   1
 -11  -2 -13 2.66380 1.92216   2
 -11  -2  13 2.46228 1.91693   1
 -11   2 -13 3.08113 2.02988   3
  11  -2 -13 0.18445 2.01564   1
 -12  -2 -13 14.2695 2.91680   2
   0   3 -13 49.3941 2.72407   2
   0   3 -13 44.4193 2.32917   3
   0  -3 -13 45.0912 2.75292   2
   0  -3 -13 46.9258 2.57433   1
   0  -3  13 44.9174 2.47330   1
   1   3 -13 29.0503 1.75889   3
   1   3 -13 30.4924 2.29391   2
  -1  -3 -13 28.2685 1.91273   1
   1  -3  13 27.9880 1.86749   1
  -1  -3 -13 33.0190 2.34422   2
  -1  -3  13 31.7361 2.22647   1
   1  -3 -13 30.2073 2.31201   1
  -1   3 -13 30.8741 2.17703   2
   1  -3 -13 33.0328 2.38688   2
  -1   3 -13 29.7096 2.11885   3
   2   3 -13 76.6193 3.61843   2
  -2  -3 -13 83.5106 3.72169   2
  -2  -3 -13 76.7919 2.81880   1
   2  -3  13 73.4505 2.74013   1
   2  -3 -13 82.4523 3.48757   2
  -2   3 -13 76.2898 3.38785   2
   2  -3 -13 74.8911 3.78331   1
  -2  -3  13 78.5358 3.74164   1
  -2   3 -13 74.7087 3.50256   3
  -3  -3 -13 19.9075 2.19220   2
   3   3 -13 16.1370 1.99126   2
  -3   3 -13 16.8861 2.12370   3
   3  -3 -13 15.0686 2.19716   1
  -3   3 -13 17.7604 1.98624   2
   3  -3 -13 14.6490 1.76132   2
  -3  -3  13 16.7955 2.27391   1
  -4  -3 -13 215.752 6.82510   2
   4  -3 -13 223.596 6.26053   2
  -4   3 -13 209.478 7.00789   3
  -4   3 -13 221.533 6.30061   2
   4  -3 -13 222.423 7.61375   1
  -4  -3  13 210.427 7.38809   1
  -5  -3 -13 18.8652 2.36320   2
  -5  -3  13 21.4303 2.86983   1
   5  -3 -13 22.5889 2.90886   1
  -5   3 -13 25.3655 2.92677   3
  -5   3 -13 23.4337 2.32864   2
   5  -3 -13 22.1525 2.23021   2
  -6  -3 -13 45.5052 3.39404   2
  -6  -3  13 42.9271 4.16203   1
  -6   3 -13 49.1163 2.97988   2
  -6   3 -13 53.5128 3.82819   3
   6  -3 -13 48.2932 3.85393   1
  -7  -3 -13 31.3389 3.35342   2
   7  -3 -13 40.3166 4.21785   1
  -7   3 -13 40.7802 4.05959   3
  -7  -3  13 35.5284 4.02178   1
  -8  -3 -13 28.3088 3.32871   2
  -8   3 -13 23.3116 3.33742   3
  -8  -3  13 28.7000 3.79813   1
   8  -3 -13 27.2328 3.74861   1
  -9  -3 -13 2.08219 1.68107   2
   9  -3 -13 5.58780 2.21320   1
  -9  -3  13 3.50080 2.06027   1
  -9   3 -13 7.00181 2.33897   3
 -10  -3 -13 20.4226 3.19003   2
  10  -3 -13 19.3105 3.50990   1
 -10   3 -13 20.5702 3.44889   3
 -10  -3  13 15.6028 3.22791   1
 -11  -3 -13 10.6174 2.69856   2
 -11   3 -13 6.89423 2.61393   3
 -11  -3  13 11.9545 3.06987   1
  11  -3 -13 17.3883 3.59964   1
   0  -4 -13 4.32091 1.18695   2
   0   4 -13 3.22483 0.97515   3
   0  -4  13 3.12345 1.04505   1
   0  -4 -13 3.42792 1.12788   1
   0   4 -13 2.86009 1.05566   2
  -1  -4 -13 241.993 6.84709   2
   1   4 -13 244.352 6.07628   3
   1   4 -13 231.158 6.71606   2
   1  -4  13 245.886 6.49193   1
  -1  -4 -13 251.232 6.50698   1
   1  -4 -13 245.890 6.75254   2
   1  -4 -13 247.898 7.21101   1
  -1   4 -13 243.791 6.63537   2
  -1   4 -13 247.233 6.70322   3
  -1  -4  13 240.152 7.04547   1
  -2  -4 -13 33.6054 2.47305   2
   2  -4  13 33.4127 2.00060   1
   2   4 -13 32.7806 2.45496   2
  -2  -4 -13 34.7080 2.03559   1
   2  -4 -13 35.7208 2.41300   2
   2  -4 -13 34.9659 2.76839   1
  -2   4 -13 33.3973 2.40343   2
  -2  -4  13 32.0909 2.52880   1
  -2   4 -13 39.2748 2.63935   3
  -3  -4 -13 24.0091 2.47408   2
  -3   4 -13 22.7847 2.49506   3
  -3  -4  13 21.0097 2.44253   1
   3  -4 -13 24.8359 2.79985   1
  -3   4 -13 27.0795 2.32304   2
   3  -4 -13 26.3338 2.29795   2
  -4  -4 -13 25.9237 2.70597   2
   4  -4 -13 22.4140 2.81965   1
  -4  -4  13 22.8833 2.73915   1
  -4   4 -13 25.3363 2.75144   3
  -4   4 -13 21.4818 2.18553   2
   4  -4 -13 28.8776 2.20819   2
  -5  -4 -13 101.236 4.81160   2
  -5   4 -13 99.5984 4.92671   3
  -5  -4  13 103.209 5.21900   1
   5  -4 -13 103.258 5.33966   1
  -5   4 -13 99.8816 4.10532   2
   5  -4 -13 96.8759 3.91560   2
  -6  -4 -13 88.9741 4.59784   2
  -6  -4  13 81.7166 4.91324   1
  -6   4 -13 91.8169 4.91185   3
   6  -4 -13 84.2783 5.08130   1
  -7  -4 -13 10.4225 2.19326   2
  -7  -4  13 0.42742 1.49852   1
  -7   4 -13 7.59182 2.04763   3
   7  -4 -13 8.06590 2.23367   1
  -8  -4 -13 30.5690 3.50302   2
   8  -4 -13 24.0889 3.51868   1
  -8   4 -13 38.0602 4.17873   3
  -8  -4  13 26.3943 3.65496   1
  -9  -4 -13 2.59856 1.63696   2
  -9  -4  13 2.46507 1.91603   1
  -9   4 -13 0.95151 1.58729   3
   9  -4 -13 5.22387 2.15159   1
 -10  -4 -13 15.7863 2.88550   2
 -10   4 -13 21.7607 3.66208   3
  10  -4 -13 18.6972 3.69558   1
 -10  -4  13 18.8097 3.40276   1
 -11  -4 -13 2.62954 1.79848   2
 -11  -4  13 0.45288 1.65187   1
  11  -4 -13 2.77317 2.36861   1
 -11   4 -13 4.56880 2.20152   3
   0  -5 -13 229.827 6.65847   2
   0   5 -13 229.491 6.44967   3
   0   5 -13 232.003 6.58141   2
   0  -5 -13 238.562 6.88932   1
   0  -5  13 225.928 6.78434   1
   1  -5  13 16.9321 1.96230   1
   1   5 -13 12.8667 1.86442   2
  -1  -5 -13 11.9162 1.80861   2
  -1  -5 -13 15.0972 1.82906   1
   1  -5 -13 13.5936 1.80450   2
  -1   5 -13 17.9608 1.96297   2
  -1  -5  13 12.7312 1.85208   1
  -1   5 -13 17.4391 2.03310   3
   1  -5 -13 14.5235 2.04827   1
   2  -5  13 17.7926 1.92752   1
  -2  -5 -13 16.5702 1.84794   1
  -2  -5 -13 14.9171 2.02842   2
  -2   5 -13 15.8688 2.10457   3
  -2  -5  13 13.5364 2.01000   1
   2  -5 -13 14.9542 1.87923   2
   2  -5 -13 14.3880 2.15991   1
  -2   5 -13 17.6234 1.92336   2
   3  -5  13 36.6702 2.29968   1
  -3  -5 -13 31.3815 2.89150   2
   3  -5 -13 37.1231 3.51550   1
   3  -5 -13 37.6648 2.41663   2
  -3   5 -13 35.8510 3.22112   3
  -3   5 -13 33.8478 2.38778   2
  -3  -5  13 35.0867 3.29838   1
  -4  -5 -13 8.52606 1.82753   2
  -4   5 -13 7.86591 1.83427   3
  -4  -5  13 7.31992 1.78612   1
   4  -5 -13 11.6543 2.26588   1
   4  -5 -13 7.57960 1.33506   2
  -4   5 -13 8.25230 1.50340   2
  -5  -5 -13 30.4502 3.11055   2
  -5  -5  13 33.8357 3.48449   1
   5  -5 -13 33.9670 3.75182   1
  -5   5 -13 30.5294 3.29658   3
  -6  -5 -13 15.0669 2.37023   2
  -6  -5  13 14.6388 2.67950   1
  -6   5 -13 18.1316 2.65276   3
   6  -5 -13 18.4386 3.06443   1
  -7  -5 -13 82.1113 4.77556   2
  -7   5 -13 71.8752 4.77743   3
  -7  -5  13 72.0605 4.88229   1
   7  -5 -13 81.4494 5.31537   1
  -8  -5 -13 50.2573 3.89625   2
   8  -5 -13 58.4768 5.52601   1
  -8   5 -13 46.9022 4.62200   3
  -8  -5  13 53.2287 4.99389   1
  -9  -5 -13 14.6122 2.87582   2
  -9   5 -13 14.8101 3.12543   3
   9  -5 -13 15.1854 3.19128   1
  -9  -5  13 22.1739 3.47935   1
 -10  -5 -13 -0.3000 1.57064   2
 -10  -5  13 0.31514 1.72252   1
  10  -5 -13 -0.8437 1.64338   1
 -10   5 -13 -1.6150 1.42784   3
   0   6 -13 37.9689 2.63102   3
   0   6 -13 38.7885 2.64903   2
   0  -6  13 33.7151 2.65469   1
   0  -6 -13 32.7575 2.56998   1
   0  -6 -13 31.9048 2.44625   2
   1  -6  13 106.167 4.45717   1
  -1  -6 -13 106.879 4.37543   1
  -1  -6 -13 105.023 4.32831   2
   1  -6 -13 100.485 4.64830   1
  -1  -6  13 101.353 4.57330   1
  -1   6 -13 101.119 4.06263   2
   1  -6 -13 102.639 4.13838   2
  -1   6 -13 99.1041 4.33592   3
  -2  -6 -13 13.1954 2.04825   2
   2  -6  13 12.2772 1.81596   1
  -2  -6 -13 14.2361 1.87452   1
  -2   6 -13 11.3923 1.62421   2
   2  -6 -13 12.1167 1.74865   2
   2  -6 -13 12.7847 2.11913   1
  -2  -6  13 12.1030 2.02929   1
  -2   6 -13 15.4124 2.20185   3
  -3  -6 -13 121.406 5.16128   2
   3  -6  13 127.486 4.65490   1
  -3   6 -13 132.572 4.46313   2
   3  -6 -13 124.035 5.81370   1
  -3  -6  13 134.313 5.68647   1
  -3   6 -13 133.870 5.41755   3
  -4  -6 -13 20.5652 2.61937   2
   4  -6 -13 26.4039 3.28293   1
  -4   6 -13 23.5798 2.76706   3
  -4  -6  13 21.8230 2.79534   1
  -5  -6 -13 0.45838 1.25276   2
  -5  -6  13 2.49567 1.43467   1
  -5   6 -13 -0.1390 1.23665   3
   5  -6 -13 -0.7819 1.24535   1
  -6  -6 -13 16.5174 2.56849   2
  -6   6 -13 15.1691 2.51964   3
   6  -6 -13 12.0656 2.58016   1
  -6  -6  13 14.2456 2.59794   1
  -7  -6 -13 3.43227 1.53545   2
   7  -6 -13 2.43401 1.70063   1
  -7  -6  13 7.38622 2.27854   1
  -7   6 -13 1.25903 1.39003   3
  -8  -6 -13 13.3109 2.60126   2
  -8   6 -13 10.0581 2.53451   3
   8  -6 -13 15.0732 2.98805   1
  -8  -6  13 12.7188 2.75381   1
  -9  -6 -13 2.48473 1.87981   2
  -9   6 -13 1.17388 1.89497   3
   9  -6 -13 3.79918 2.17896   1
  -9  -6  13 1.30782 1.72847   1
 -10  -6 -13 18.8297 3.24632   2
 -10  -6  13 15.6505 3.25123   1
 -10   6 -13 16.1409 3.35364   3
  10  -6 -13 18.0876 3.88933   1
   0  -7  13 18.7151 2.43837   1
   0  -7 -13 19.6995 2.27184   2
   0  -7 -13 20.8228 2.54417   1
   1  -7  13 38.5488 2.96191   1
  -1  -7 -13 35.0769 3.03474   2
  -1  -7 -13 36.9201 2.88620   1
   1  -7 -13 38.0008 3.54492   1
  -1   7 -13 36.3817 2.85437   3
  -1   7 -13 42.5352 2.70947   2
  -1  -7  13 41.4422 3.13535   1
   1  -7 -13 35.0816 2.71434   2
  -2  -7 -13 44.5975 3.08336   2
   2  -7  13 46.5340 3.01798   1
  -2  -7 -13 55.6329 3.26168   1
  -2   7 -13 50.6135 3.34791   3
   2  -7 -13 55.8217 3.73746   1
  -2  -7  13 56.4965 3.71138   1
   3  -7  13 9.39686 1.70708   1
  -3  -7 -13 9.80780 1.96656   2
  -3   7 -13 6.39463 1.69395   3
  -3  -7  13 4.15781 1.58033   1
   3  -7 -13 4.97260 1.65334   1
  -4  -7 -13 30.2193 3.19008   2
  -4   7 -13 32.4428 3.38043   3
  -4  -7  13 29.1201 3.34809   1
   4  -7 -13 32.1977 3.69510   1
  -5  -7 -13 5.06311 1.75942   2
  -5   7 -13 8.58694 2.09769   3
   5  -7 -13 7.50566 2.24827   1
  -5  -7  13 5.68729 1.78916   1
  -6  -7 -13 32.7679 3.52301   2
   6  -7 -13 27.2577 3.69364   1
  -6   7 -13 23.2968 3.14176   3
  -6  -7  13 28.7684 3.59123   1
  -7  -7 -13 12.0317 2.36533   2
  -7  -7  13 7.66734 2.23156   1
   7  -7 -13 14.7748 3.01384   1
  -7   7 -13 17.0091 2.99687   3
  -8  -7 -13 3.28904 1.90599   2
   8  -7 -13 6.50503 2.38931   1
  -8  -7  13 2.45576 1.80244   1
  -8   7 -13 4.30492 1.95729   3
  -9  -7 -13 0.73473 1.51246   2
  -9   7 -13 -0.5968 1.57120   3
  -9  -7  13 3.57848 2.15848   1
   9  -7 -13 1.60235 1.85476   1
   0  -8 -13 -0.6379 1.08073   2
   0  -8 -13 -0.5072 1.07946   1
   0  -8  13 -0.0146 1.10202   1
  -1  -8 -13 28.4351 3.02110   1
   1  -8  13 26.1599 2.88564   1
  -1  -8 -13 27.4267 2.73925   2
  -1   8 -13 21.8328 2.70979   3
   1  -8 -13 29.6789 3.27402   1
  -1  -8  13 28.9211 3.21049   1
  -2  -8 -13 22.2209 2.61570   1
   2  -8  13 22.7442 2.62618   1
  -2  -8 -13 16.6664 2.34820   2
  -2   8 -13 22.5404 2.83324   3
   2  -8 -13 27.0303 3.20332   1
  -2  -8  13 25.0403 3.04172   1
   3  -8  13 11.7519 2.00769   1
  -3  -8 -13 10.0745 2.02361   2
  -3  -8  13 10.6753 2.19425   1
  -3   8 -13 8.73303 2.10826   3
   3  -8 -13 11.0563 2.38137   1
  -4  -8 -13 1.90820 1.36899   2
   4  -8 -13 2.83542 1.72707   1
  -4  -8  13 0.84427 1.38864   1
  -4   8 -13 2.22252 1.60754   3
  -5  -8 -13 3.69934 1.71837   2
  -5  -8  13 10.9972 2.47195   1
   5  -8 -13 12.6895 2.75292   1
  -5   8 -13 9.02880 2.23072   3
  -6  -8 -13 11.5282 2.36408   2
  -6  -8  13 9.01105 2.33198   1
  -6   8 -13 9.75556 2.31901   3
   6  -8 -13 12.4802 2.78342   1
  -7  -8 -13 5.62552 1.97038   2
   7  -8 -13 3.56627 2.04206   1
  -7   8 -13 4.04559 1.80358   3
  -7  -8  13 7.30995 2.35761   1
  -8  -8 -13 5.33131 2.10143   2
  -8  -8  13 4.36074 2.20637   1
   8  -8 -13 2.70913 2.18510   1
  -8   8 -13 2.79236 1.84883   3
  -9  -8 -13 1.37981 1.76683   2
  -9  -8  13 0.57824 1.70374   1
  -9   8 -13 0.21888 1.71910   3
   9  -8 -13 3.86047 2.39338   1
   0  -9  13 53.9736 3.84635   1
   0  -9 -13 49.5698 3.80689   1
  -1  -9 -13 12.4566 2.30381   1
  -1  -9 -13 10.1347 1.92081   2
   1  -9  13 18.7232 2.66761   1
  -1  -9  13 11.0680 2.28552   1
   1  -9 -13 12.8564 2.44936   1
   2  -9  13 20.6244 2.69860   1
  -2  -9 -13 23.6112 2.92201   1
  -2  -9 -13 20.8110 2.69040   2
  -2  -9  13 18.2655 2.81490   1
  -2   9 -13 20.5807 2.84523   3
   2  -9 -13 20.2125 3.03265   1
   3  -9  13 5.10274 1.65623   1
  -3  -9 -13 6.15612 1.89116   2
  -3  -9  13 7.19182 1.95805   1
   3  -9 -13 9.45050 2.38223   1
  -3   9 -13 8.33232 2.00373   3
  -4  -9 -13 22.7889 3.01084   2
  -4  -9  13 20.9321 3.07555   1
  -4   9 -13 24.0341 3.28128   3
   4  -9 -13 23.1230 3.28881   1
  -5  -9 -13 -0.3725 1.29547   2
   5  -9 -13 0.74992 1.47412   1
  -5  -9  13 -2.0977 1.17128   1
  -5   9 -13 0.81106 1.39056   3
  -6  -9 -13 7.57714 2.21449   2
  -6  -9  13 6.69915 2.17263   1
   6  -9 -13 10.2906 2.71724   1
  -6   9 -13 8.16017 2.24734   3
  -7  -9 -13 12.9303 2.65052   2
  -7   9 -13 13.7518 2.90566   3
  -7  -9  13 14.6152 2.96439   1
   7  -9 -13 15.5237 3.39938   1
  -8  -9 -13 29.8699 4.05989   2
  -8   9 -13 28.3083 3.82295   3
  -8  -9  13 25.6542 3.95658   1
   8  -9 -13 23.8410 4.09635   1
   0 -10 -13 35.9412 3.83818   1
   0 -10  13 29.8030 3.55466   1
  -1 -10 -13 11.3265 2.32536   1
   1 -10  13 14.4671 2.53285   1
  -1 -10  13 13.1908 2.55639   1
   1 -10 -13 9.74086 2.31083   1
   2 -10  13 20.8813 2.90359   1
  -2 -10 -13 26.6216 3.20945   1
  -2 -10  13 21.7600 3.11548   1
   2 -10 -13 27.7949 3.71476   1
  -3 -10 -13 44.7202 4.01032   2
   3 -10  13 40.1662 3.86386   1
   3 -10 -13 51.0177 4.84968   1
  -3 -10  13 51.8940 4.14634   1
  -3  10 -13 41.3495 4.07757   3
  -4 -10 -13 4.04414 1.79303   2
  -4  10 -13 2.10776 1.72806   3
   4 -10 -13 7.41608 2.31521   1
  -4 -10  13 1.17365 1.44686   1
  -5 -10 -13 1.45173 1.55840   2
  -5 -10  13 2.16548 1.67591   1
  -5  10 -13 3.83858 1.89111   3
   5 -10 -13 0.70244 1.83797   1
  -6 -10 -13 -1.6914 1.46484   2
  -6 -10  13 0.29074 1.58534   1
  -6  10 -13 -0.2020 1.35377   3
   6 -10 -13 -0.8889 1.66759   1
  -7 -10 -13 13.2626 2.98811   2
  -7  10 -13 7.71848 2.70122   3
   7 -10 -13 7.38331 2.69132   1
  -7 -10  13 9.12794 2.67209   1
   0 -11  13 14.1876 2.62124   1
   0 -11 -13 13.6488 2.77210   1
  -1 -11 -13 19.2757 3.05081   1
   1 -11  13 25.0969 3.38039   1
   1 -11 -13 23.5438 3.49588   1
  -1 -11  13 23.1210 3.45368   1
   2 -11  13 6.81120 2.07034   1
  -2 -11 -13 12.2511 2.48016   1
   2 -11 -13 7.27359 2.27171   1
  -2 -11  13 11.1317 2.54803   1
   3 -11  13 2.09752 1.49552   1
   3 -11 -13 0.85608 1.60560   1
  -3 -11  13 0.23265 1.47152   1
  -4 -11 -13 3.51227 1.76496   2
  -4  11 -13 2.20514 1.89827   3
  -4 -11  13 1.32680 1.58726   1
   4 -11 -13 0.94101 1.89458   1
  -5 -11 -13 5.29870 1.93845   2
  -5 -11  13 6.54908 2.18773   1
  -5  11 -13 6.68515 2.22392   3
   5 -11 -13 5.80010 2.40190   1
  -6 -11 -13 15.0983 3.11779   2
   0 -12  13 0.12187 1.55971   1
   0 -12 -13 0.50074 1.69199   1
  -1 -12 -13 31.1710 3.95907   1
   1 -12  13 27.0977 3.63301   1
  -1 -12  13 29.0603 3.83144   1
   1 -12 -13 37.8398 4.39194   1
  -2 -12 -13 3.61028 1.90833   1
   2 -12  13 3.45306 1.82140   1
   2 -12 -13 2.86174 2.16790   1
  -2 -12  13 4.34023 2.00206   1
   3 -12  13 2.91623 1.83534   1
  -3 -12  13 0.62852 1.87353   1
   3 -12 -13 2.06390 2.04679   1
  -4 -12  13 8.49777 2.47109   1
   4 -12 -13 8.32093 2.66080   1
   0 -13  13 50.3618 5.10752   1
   0 -13 -13 64.1002 5.14977   1
  -1 -13 -13 -1.2513 1.44929   1
   1 -13  13 0.06398 1.89550   1
   1 -13 -13 0.65000 1.78697   1
  -1 -13  13 0.40985 1.92506   1
   2 -13  13 7.37116 2.59959   1
   0   0 -14 49.7392 2.46471   1
   0   0 -14 51.1602 2.87571   2
   1   0 -14 742.346 15.1838   1
   1   0 -14 738.902 13.0999   3
   1   0 -14 719.691 14.9626   2
  -1   0 -14 753.026 15.1156   2
   1   0  14 724.864 14.0527   1
  -2   0 -14 173.723 5.61930   2
   2   0 -14 183.611 5.66751   2
   2   0 -14 171.088 5.73729   1
  -3   0 -14 11.0768 1.73816   2
   3   0 -14 11.9259 1.96602   1
   3   0 -14 10.8563 1.61764   2
  -4   0 -14 3.09054 1.22797   2
   4   0 -14 2.62940 1.08889   2
   4   0 -14 3.54085 1.47945   1
   5   0 -14 25.1732 2.60531   2
   5   0 -14 29.6254 3.27995   1
  -5   0 -14 28.2519 2.68323   2
   6   0 -14 3.04974 1.53952   1
  -6   0 -14 5.08493 1.41371   2
   7   0 -14 5.85560 1.94641   1
  -7   0 -14 4.47054 1.57823   2
  -8   0 -14 20.6614 2.68441   2
   8   0 -14 22.5513 3.55631   1
  -9   0 -14 5.82784 1.83657   2
   9   0 -14 4.35677 2.00270   1
  10   0 -14 1.05810 1.84508   1
 -10   0 -14 0.78063 1.53423   2
   0   1 -14 575.641 11.1206   3
   0  -1  14 561.535 11.8251   1
   0  -1 -14 548.960 12.1889   2
   0   1 -14 559.525 12.1261   2
   0  -1 -14 567.037 11.7738   1
  -1  -1 -14 8.45681 1.46936   2
   1  -1  14 10.2425 1.19421   1
  -1  -1 -14 11.0213 1.25179   1
   1   1 -14 9.86632 1.02078   3
   1   1 -14 9.55305 1.55457   2
  -1  -1  14 9.03905 1.48488   1
   1  -1 -14 12.2937 1.67541   1
  -1   1 -14 10.5189 1.59749   2
   1  -1 -14 10.1294 1.57498   2
  -1   1 -14 11.7177 1.48556   3
   2   1 -14 30.0387 2.27234   2
  -2  -1 -14 27.1057 2.47140   2
  -2  -1 -14 27.4441 1.35365   1
   2  -1 -14 30.6912 2.45675   1
  -2   1 -14 32.1245 2.34378   3
   2  -1 -14 30.9328 2.61827   2
  -2   1 -14 29.3860 2.59519   2
   3   1 -14 3.26032 1.19885   1
  -3  -1 -14 2.05276 1.10890   2
   3   1 -14 1.71445 1.01964   2
   3  -1 -14 2.54343 0.95307   2
  -3   1 -14 2.17383 1.04746   2
   3  -1 -14 0.10937 1.02858   1
  -4  -1 -14 20.3561 2.24523   2
   4   1 -14 25.6669 2.54588   2
   4   1 -14 21.3284 2.59930   1
  -4   1 -14 25.9391 2.50580   2
   4  -1 -14 22.1168 2.72356   1
   4  -1 -14 22.2959 2.29665   2
  -5  -1 -14 94.1611 4.38153   2
   5   1 -14 94.1364 4.94195   1
  -5   1 -14 94.3160 4.21242   2
   5  -1 -14 89.1385 4.83479   1
   5  -1 -14 91.6823 4.09761   2
   6   1 -14 4.86841 1.69030   1
  -6  -1 -14 5.86902 1.60674   2
  -6   1 -14 3.79934 1.38608   2
   6  -1 -14 6.25268 1.89636   1
  -7  -1 -14 18.3608 2.53799   2
   7   1 -14 13.1157 2.59858   1
   7  -1 -14 16.1390 2.86293   1
  -7   1 -14 17.2230 2.30480   2
  -8  -1 -14 8.07456 1.89740   2
  -8   1 -14 6.90867 1.88933   2
   8  -1 -14 4.53553 1.95238   1
  -9  -1 -14 14.1548 2.61387   2
  -9   1 -14 19.7177 2.75911   2
  -9  -1  14 11.7373 2.85748   1
  -9   1 -14 21.4564 3.33636   3
   9  -1 -14 18.1906 3.21785   1
 -10  -1 -14 10.7031 2.43576   2
 -10   1 -14 7.39069 2.43239   3
  10  -1 -14 10.4372 2.75557   1
 -10  -1  14 8.06429 2.57401   1
 -11  -1 -14 25.9923 3.54650   2
  11  -1 -14 10.3988 3.08733   1
 -11  -1  14 18.4624 3.64726   1
 -11   1 -14 18.6124 3.44120   3
   0   2 -14 11.5396 1.69961   2
   0   2 -14 11.6681 1.37428   3
   0  -2 -14 13.4415 1.60733   1
   0  -2 -14 9.78025 1.59554   2
   0  -2  14 10.4550 1.42988   1
  -1  -2 -14 30.7164 2.61778   2
   1   2 -14 24.5863 2.34417   2
   1  -2  14 28.9336 1.75902   1
   1   2 -14 24.3757 1.51378   3
  -1  -2 -14 29.6179 1.81579   1
   1  -2 -14 29.0542 2.55593   2
   1  -2 -14 29.6918 2.27699   1
  -1  -2  14 27.5844 2.12892   1
  -1   2 -14 30.0026 2.04886   3
  -1   2 -14 24.1646 2.26858   2
  -2  -2 -14 8.12278 1.51203   2
   2   2 -14 8.27661 1.53460   2
   2  -2  14 8.94875 1.02015   1
  -2  -2 -14 9.14493 1.03627   1
  -2  -2  14 7.78365 1.55977   1
   2  -2 -14 8.20256 1.57723   1
   2  -2 -14 7.96443 1.48272   2
  -2   2 -14 7.39302 1.36657   3
  -2   2 -14 8.17184 1.47909   2
   3   2 -14 110.053 4.52829   2
  -3  -2 -14 107.907 4.43850   2
  -3  -2  14 108.637 4.82320   1
   3  -2 -14 107.397 4.19867   2
  -3   2 -14 121.143 4.74491   3
  -3   2 -14 113.634 4.34584   2
   3  -2 -14 112.879 4.91808   1
  -4  -2 -14 28.9445 2.72824   2
   4   2 -14 27.8904 2.71401   2
   4  -2 -14 25.0188 2.89692   1
   4  -2 -14 23.3446 2.30758   2
  -4  -2  14 23.9798 2.85846   1
  -4   2 -14 26.2467 2.50282   2
  -4   2 -14 21.0468 2.51430   3
  -5  -2 -14 68.8783 3.82963   2
  -5   2 -14 65.8180 4.05305   3
  -5  -2  14 67.2507 4.37868   1
   5  -2 -14 67.6775 4.23077   1
  -5   2 -14 64.0023 3.47655   2
   5  -2 -14 71.6216 3.49572   2
  -6  -2 -14 84.1757 4.37269   2
  -6  -2  14 92.9206 5.28197   1
   6  -2 -14 86.8580 5.11420   1
  -6   2 -14 90.5589 4.18135   2
  -6   2 -14 88.1651 4.87514   3
  -7  -2 -14 23.6071 2.95958   2
  -7   2 -14 25.3517 3.27495   3
  -7  -2  14 33.6888 3.99200   1
   7  -2 -14 19.6188 3.13133   1
  -7   2 -14 25.8964 2.69345   2
  -8  -2 -14 10.1263 2.16248   2
  -8   2 -14 15.3697 2.76848   3
  -8   2 -14 10.0765 1.99856   2
   8  -2 -14 12.3818 2.72625   1
  -8  -2  14 17.0876 3.05781   1
  -9  -2 -14 -0.2760 1.34382   2
  -9   2 -14 2.43133 1.80643   3
   9  -2 -14 1.73801 1.71451   1
  -9  -2  14 0.41969 1.60633   1
 -10  -2 -14 3.99643 1.86805   2
  10  -2 -14 6.13374 2.54005   1
 -10  -2  14 4.08146 2.20514   1
 -10   2 -14 2.23804 1.80378   3
 -11  -2 -14 20.1220 3.31997   2
 -11  -2  14 19.6570 3.81082   1
  11  -2 -14 30.4193 4.70248   1
 -11   2 -14 18.2599 3.57093   3
 -12  -2 -14 -0.1024 1.82732   2
   0  -3 -14 0.68211 0.86989   2
   0   3 -14 3.03001 0.91530   3
   0  -3 -14 0.33936 0.81060   1
   0  -3  14 0.20315 0.69428   1
   0   3 -14 1.43507 0.91363   2
   1  -3  14 19.2934 1.77675   1
   1   3 -14 15.0304 1.91608   2
   1   3 -14 18.0382 1.56645   3
  -1  -3 -14 18.7498 2.13360   2
  -1  -3 -14 19.0741 1.79561   1
   1  -3 -14 20.3221 2.13671   1
   1  -3 -14 19.5333 2.10738   2
  -1  -3  14 19.3474 2.11370   1
  -1   3 -14 18.9899 2.04254   2
  -1   3 -14 20.1055 2.00736   3
   2  -3  14 63.8313 2.56157   1
   2   3 -14 65.6394 3.40432   2
  -2  -3 -14 66.6702 2.60876   1
  -2  -3 -14 64.8425 3.42430   2
   2  -3 -14 64.7728 3.55927   1
  -2  -3  14 55.4461 3.24795   1
   2  -3 -14 58.6207 3.11539   2
  -2   3 -14 63.1174 3.28478   3
  -2   3 -14 63.1115 3.22419   2
   3   3 -14 2.40421 1.08817   2
  -3  -3 -14 2.61032 1.13047   2
  -3  -3  14 1.86232 1.06682   1
  -3   3 -14 0.94567 0.98816   3
  -3   3 -14 2.04674 1.13880   2
   3  -3 -14 0.85549 1.11265   1
   3  -3 -14 2.55361 1.03807   2
  -4  -3 -14 16.7850 2.21130   2
   4  -3 -14 20.2792 2.17934   2
  -4   3 -14 17.3526 2.34474   3
   4  -3 -14 18.3893 2.59236   1
  -4  -3  14 18.7790 2.58184   1
  -4   3 -14 19.0216 2.16911   2
  -5  -3 -14 63.3515 3.76059   2
  -5   3 -14 51.7956 3.61059   3
  -5   3 -14 61.5202 3.38807   2
  -5  -3  14 51.2922 3.78650   1
   5  -3 -14 53.8108 3.93376   1
   5  -3 -14 52.4369 3.07821   2
  -6  -3 -14 54.9272 3.64433   2
  -6   3 -14 58.9747 4.02368   3
   6  -3 -14 49.6538 4.62031   1
  -6   3 -14 58.8543 3.34688   2
  -6  -3  14 64.3643 4.44666   1
  -7  -3 -14 21.8570 2.91698   2
   7  -3 -14 20.2349 3.14319   1
  -7   3 -14 19.2752 2.87696   3
  -7  -3  14 18.2640 2.95073   1
  -8  -3 -14 7.85824 2.07886   2
  -8  -3  14 7.58984 2.32933   1
  -8   3 -14 3.94167 1.80851   3
   8  -3 -14 6.00862 2.25132   1
  -9  -3 -14 1.28253 1.58552   2
  -9  -3  14 2.12678 1.93624   1
   9  -3 -14 1.78915 1.78329   1
  -9   3 -14 1.83450 1.67390   3
 -10  -3 -14 3.13531 1.86225   2
  10  -3 -14 7.06859 2.59789   1
 -10   3 -14 3.00110 1.91935   3
 -10  -3  14 3.94448 2.13143   1
 -11  -3 -14 1.72644 1.84080   2
  11  -3 -14 2.57128 2.07825   1
 -11   3 -14 1.43713 1.92994   3
 -11  -3  14 -1.5163 1.53701   1
   0  -4 -14 262.311 7.24846   2
   0  -4  14 263.287 7.19782   1
   0  -4 -14 254.527 7.26570   1
   0   4 -14 267.420 7.27786   2
   0   4 -14 266.733 6.81770   3
  -1  -4 -14 69.8163 3.54124   2
   1  -4  14 70.1743 3.12238   1
   1   4 -14 69.6828 2.87595   3
   1   4 -14 69.2417 3.46243   2
  -1   4 -14 64.3033 3.20057   3
  -1  -4  14 62.2760 3.35961   1
  -1   4 -14 69.9954 3.30766   2
   1  -4 -14 65.5759 3.38452   2
   1  -4 -14 64.8593 3.46289   1
  -2  -4 -14 67.0079 2.85640   1
  -2  -4 -14 63.3290 3.47388   2
   2   4 -14 63.5813 3.46285   2
   2  -4  14 67.8048 2.89532   1
  -2  -4  14 67.7722 3.68040   1
   2  -4 -14 66.0651 3.27693   2
  -2   4 -14 65.8428 3.42467   3
   2  -4 -14 59.6129 3.61965   1
  -2   4 -14 63.8929 3.20845   2
  -3  -4 -14 250.860 7.48009   2
  -3   4 -14 239.463 7.37004   3
  -3  -4  14 238.433 7.77597   1
   3  -4 -14 247.910 8.00408   1
   3  -4 -14 237.084 6.71954   2
  -3   4 -14 244.118 6.73586   2
  -4  -4 -14 42.7892 3.06131   2
  -4   4 -14 47.7938 3.30183   3
  -4   4 -14 46.8734 2.93188   2
   4  -4 -14 43.4745 2.68934   2
   4  -4 -14 43.8650 3.51108   1
  -4  -4  14 43.8473 3.35529   1
  -5  -4 -14 110.883 5.04903   2
  -5   4 -14 103.770 5.17998   3
  -5  -4  14 101.519 5.33145   1
  -5   4 -14 113.978 4.51102   2
   5  -4 -14 121.035 5.85986   1
   5  -4 -14 115.033 4.38644   2
  -6  -4 -14 4.33920 1.64821   2
   6  -4 -14 8.68875 2.23349   1
  -6   4 -14 9.30084 2.06684   3
  -6  -4  14 5.31822 1.84341   1
  -7  -4 -14 4.06343 1.81257   2
  -7   4 -14 5.16983 1.89992   3
  -7  -4  14 3.58413 1.88023   1
   7  -4 -14 0.13811 1.47930   1
  -8  -4 -14 133.474 6.27825   2
  -8   4 -14 115.947 6.24924   3
  -8  -4  14 131.472 6.98499   1
   8  -4 -14 134.234 7.08870   1
  -9  -4 -14 1.92487 1.70586   2
  -9   4 -14 0.36001 1.39520   3
   9  -4 -14 -0.0998 1.59781   1
  -9  -4  14 1.86371 1.68570   1
 -10  -4 -14 6.90265 2.34136   2
 -10   4 -14 5.75263 2.26451   3
  10  -4 -14 10.8649 2.90883   1
 -10  -4  14 5.06900 2.28681   1
 -11  -4 -14 2.66993 1.94590   2
   0  -5 -14 78.7696 3.76405   1
   0  -5  14 76.1479 3.67992   1
   0  -5 -14 76.5328 3.65286   2
   0   5 -14 82.2233 3.70325   2
   0   5 -14 80.0408 3.52366   3
   1   5 -14 20.0132 2.22432   2
   1  -5  14 26.5964 2.46009   1
  -1  -5 -14 25.4423 2.48762   2
  -1  -5 -14 28.1757 2.27748   1
  -1   5 -14 24.3044 2.31804   2
   1  -5 -14 22.4380 2.35918   2
   1  -5 -14 24.2609 2.72719   1
  -1  -5  14 24.2331 2.51217   1
  -1   5 -14 22.7325 2.35700   3
   2  -5  14 51.8141 2.81391   1
  -2  -5 -14 48.1265 3.15139   2
  -2  -5 -14 50.7704 2.67802   1
   2  -5 -14 46.6986 2.86116   2
   2  -5 -14 48.6181 3.33366   1
  -2   5 -14 46.7811 2.81680   2
  -2  -5  14 44.3934 3.11020   1
  -2   5 -14 51.0820 3.09160   3
  -3  -5 -14 143.431 5.55644   2
  -3   5 -14 147.899 5.71676   3
   3  -5 -14 140.053 6.02301   1
  -3  -5  14 145.658 5.89491   1
  -3   5 -14 156.653 5.06114   2
   3  -5 -14 144.106 4.93741   2
  -4  -5 -14 36.8741 3.31948   2
   4  -5 -14 35.6226 2.42072   2
  -4  -5  14 30.5694 3.24211   1
  -4   5 -14 37.7787 3.46147   3
  -4   5 -14 35.0843 2.57731   2
   4  -5 -14 39.7075 3.82786   1
  -5  -5 -14 12.8037 2.16674   2
  -5  -5  14 15.9084 2.56414   1
   5  -5 -14 18.8687 2.89244   1
  -5   5 -14 15.6215 2.54037   3
  -6  -5 -14 4.28428 1.60476   2
  -6  -5  14 4.79676 1.75554   1
  -6   5 -14 3.79077 1.65312   3
   6  -5 -14 4.51298 1.94083   1
  -7  -5 -14 6.94908 1.99473   2
   7  -5 -14 8.21808 2.36356   1
  -7   5 -14 5.22496 1.90386   3
  -7  -5  14 10.7738 2.47667   1
  -8  -5 -14 0.34565 1.39121   2
   8  -5 -14 0.57494 1.68703   1
  -8   5 -14 0.52187 1.62584   3
  -8  -5  14 1.08091 1.59832   1
  -9  -5 -14 52.9330 4.83043   2
  -9   5 -14 54.9162 5.19224   3
  -9  -5  14 71.7814 5.32051   1
 -10  -5 -14 16.3682 2.99076   2
  10  -5 -14 18.3413 3.73328   1
 -10  -5  14 19.7557 3.60948   1
 -10   5 -14 17.3682 3.31901   3
   0  -6 -14 2.78095 1.20118   2
   0  -6  14 0.86535 1.05064   1
   0   6 -14 0.19309 1.01840   2
   0  -6 -14 3.02194 1.25933   1
   0   6 -14 0.63298 1.01212   3
  -1  -6 -14 44.0883 2.97689   1
   1  -6  14 35.0213 2.70299   1
  -1  -6 -14 34.6225 3.02311   2
  -1  -6  14 35.3432 2.86852   1
  -1   6 -14 32.0159 2.46836   2
  -1   6 -14 32.1500 2.91711   3
   1  -6 -14 35.8434 2.68734   2
   1  -6 -14 33.8860 3.20587   1
   2  -6  14 4.19818 1.31623   1
  -2  -6 -14 3.78251 1.36419   2
  -2  -6 -14 5.58084 1.41776   1
  -2   6 -14 3.19864 1.33289   3
   2  -6 -14 4.86708 1.70530   1
  -2   6 -14 3.77354 1.25230   2
  -2  -6  14 3.81748 1.44215   1
   2  -6 -14 3.34619 1.26469   2
  -3  -6 -14 5.81256 1.57865   2
  -3   6 -14 6.78294 1.42222   2
  -3   6 -14 6.29930 1.63975   3
   3  -6 -14 4.68550 1.68968   1
  -3  -6  14 4.41068 1.52724   1
  -4  -6 -14 9.13001 1.95679   2
   4  -6 -14 12.1756 2.37454   1
  -4  -6  14 12.2821 2.32628   1
  -4   6 -14 4.13572 1.52550   3
  -5  -6 -14 113.401 5.41025   2
  -5  -6  14 118.603 5.86593   1
  -5   6 -14 115.482 5.57722   3
   5  -6 -14 123.677 6.29257   1
  -6  -6 -14 0.44020 1.32590   2
  -6   6 -14 1.18521 1.44088   3
  -6  -6  14 0.80339 1.45959   1
   6  -6 -14 2.46713 1.72916   1
  -7  -6 -14 2.25494 1.48509   2
  -7  -6  14 0.53061 1.42069   1
   7  -6 -14 1.09815 1.65419   1
  -7   6 -14 1.05459 1.45024   3
  -8  -6 -14 43.7630 4.37779   2
   8  -6 -14 41.1249 4.79167   1
  -8  -6  14 46.9925 4.82574   1
  -8   6 -14 47.1617 4.74138   3
  -9  -6 -14 4.07585 2.04343   2
  -9  -6  14 2.42146 2.09282   1
   9  -6 -14 5.18730 2.35359   1
  -9   6 -14 1.59244 1.83505   3
 -10  -6 -14 11.0635 2.75058   2
 -10  -6  14 12.5851 2.97144   1
  10  -6 -14 11.5507 3.21310   1
   0  -7 -14 7.15817 1.77535   1
   0  -7 -14 7.77340 1.70642   2
   0  -7  14 4.96629 1.61601   1
   1  -7  14 377.546 10.0752   1
  -1  -7 -14 386.951 10.0430   1
  -1  -7 -14 357.884 9.58726   2
  -1  -7  14 365.667 10.3675   1
   1  -7 -14 362.784 10.4425   1
  -1   7 -14 351.132 9.70090   3
  -1   7 -14 370.872 9.24649   2
   1  -7 -14 349.189 9.13004   2
  -2  -7 -14 111.899 4.66994   1
   2  -7  14 107.611 4.66695   1
  -2  -7 -14 101.064 4.65911   2
   2  -7 -14 115.752 5.52160   1
  -2   7 -14 106.044 4.95646   3
  -2  -7  14 106.598 5.15460   1
  -3  -7 -14 6.34531 1.75237   2
   3  -7 -14 3.34925 1.70790   1
  -3  -7  14 5.57856 1.65057   1
  -3   7 -14 4.85205 1.68500   3
  -4  -7 -14 6.95408 1.77730   2
  -4   7 -14 8.60192 1.94527   3
  -4  -7  14 6.49574 1.93016   1
   4  -7 -14 6.65155 2.11441   1
  -5  -7 -14 19.1266 2.79589   2
  -5   7 -14 18.2260 2.75400   3
   5  -7 -14 16.9191 2.99037   1
  -5  -7  14 16.3435 2.78129   1
  -6  -7 -14 65.0443 4.32383   2
   6  -7 -14 54.1119 5.18683   1
  -6  -7  14 52.4114 4.24195   1
  -6   7 -14 60.7944 4.39081   3
  -7  -7 -14 70.3172 4.71184   2
  -7   7 -14 69.2973 4.91874   3
  -7  -7  14 70.3974 5.01284   1
   7  -7 -14 73.8731 5.56868   1
  -8  -7 -14 5.90623 1.98917   2
  -8  -7  14 11.0715 2.69819   1
   8  -7 -14 14.3467 3.28113   1
  -8   7 -14 10.1403 2.46033   3
  -9  -7 -14 3.30544 1.93570   2
  -9   7 -14 2.24836 1.74699   3
  -9  -7  14 1.10142 1.67485   1
   9  -7 -14 4.33914 2.17113   1
   0  -8  14 65.1717 4.03564   1
   0  -8 -14 70.4609 4.24673   1
   0  -8 -14 63.8970 3.68927   2
   1  -8  14 1.40471 1.37317   1
  -1  -8 -14 1.69481 1.27821   2
  -1  -8 -14 1.52163 1.31561   1
   1  -8 -14 1.73810 1.44559   1
  -1   8 -14 -0.8022 1.17421   3
  -1  -8  14 -2.7418 0.87049   1
  -2  -8 -14 8.73008 1.93112   2
  -2  -8 -14 9.01776 1.86601   1
   2  -8  14 10.4864 1.98163   1
  -2   8 -14 9.01947 1.96196   3
   2  -8 -14 6.99116 1.98701   1
  -2  -8  14 4.54145 1.72210   1
  -3  -8 -14 20.0447 2.63401   2
  -3   8 -14 15.8379 2.42924   3
   3  -8 -14 13.1786 2.50132   1
  -3  -8  14 11.7123 2.36680   1
  -4  -8 -14 2.54889 1.50815   2
  -4  -8  14 4.34052 1.65843   1
   4  -8 -14 4.62422 2.06187   1
  -4   8 -14 5.20623 1.79788   3
  -5  -8 -14 2.34649 1.54494   2
   5  -8 -14 -0.3953 1.45903   1
  -5   8 -14 -1.3084 1.13954   3
  -5  -8  14 0.54984 1.36729   1
  -6  -8 -14 55.8922 4.12072   2
  -6  -8  14 45.9163 4.58486   1
  -6   8 -14 55.7806 4.33481   3
   6  -8 -14 46.6326 5.01334   1
  -7  -8 -14 17.6013 2.96454   2
   7  -8 -14 17.9926 3.55578   1
  -7  -8  14 17.1323 3.03614   1
  -7   8 -14 11.7737 2.53933   3
  -8  -8 -14 3.61366 1.85590   2
  -8   8 -14 2.90618 2.11346   3
   8  -8 -14 4.59382 2.48459   1
  -8  -8  14 3.15046 2.00245   1
   0  -9  14 69.8890 4.47208   1
   0  -9 -14 74.4214 4.57480   1
  -1  -9 -14 14.8519 2.46521   1
   1  -9  14 12.5120 2.25037   1
  -1  -9 -14 18.1073 2.48204   2
   1  -9 -14 14.6178 2.61694   1
  -1  -9  14 13.3947 2.52461   1
  -2  -9 -14 50.6148 3.59831   1
   2  -9  14 44.3274 3.49507   1
  -2  -9 -14 43.2878 3.77970   2
  -2  -9  14 37.8013 3.97091   1
   2  -9 -14 40.4376 4.16325   1
  -2   9 -14 40.6532 3.82978   3
  -3  -9 -14 47.3415 3.59198   2
  -3  -9  14 41.5112 4.21862   1
   3  -9 -14 39.3050 4.29921   1
  -3   9 -14 31.3002 3.47994   3
  -4  -9 -14 7.11061 1.96968   2
  -4   9 -14 8.15912 2.11651   3
  -4  -9  14 9.62426 2.31905   1
   4  -9 -14 5.35450 2.29649   1
  -5  -9 -14 -0.6209 1.36795   2
  -5   9 -14 4.65761 2.01716   3
  -5  -9  14 0.37549 1.35276   1
   5  -9 -14 -0.6482 1.52729   1
  -6  -9 -14 9.31720 2.41055   2
  -6  -9  14 7.89875 2.34322   1
  -6   9 -14 9.54209 2.33179   3
   6  -9 -14 3.34040 2.09520   1
  -7  -9 -14 25.5757 3.59739   2
   7  -9 -14 18.2434 3.63682   1
  -7   9 -14 27.5814 3.67379   3
  -7  -9  14 21.9992 3.61032   1
  -8  -9 -14 4.79122 2.29095   2
   0 -10 -14 2.67829 1.68162   1
   0 -10  14 -1.2599 1.39841   1
   1 -10  14 15.1713 2.60870   1
  -1 -10 -14 16.8444 2.75629   1
  -1 -10  14 16.1694 2.75157   1
   1 -10 -14 10.4131 2.57242   1
   2 -10  14 -0.1901 1.39758   1
  -2 -10  14 1.10065 1.39691   1
   2 -10 -14 1.26343 1.68321   1
  -3 -10 -14 15.3140 2.60686   2
  -3 -10  14 20.2827 3.10885   1
  -3  10 -14 21.0664 3.08244   3
   3 -10 -14 23.4221 3.54829   1
  -4 -10 -14 16.6207 2.76972   2
  -4 -10  14 20.7064 3.24903   1
  -4  10 -14 16.6644 2.79282   3
  -5 -10 -14 -0.2775 1.45114   2
  -5  10 -14 0.07919 1.47649   3
   5 -10 -14 4.43990 2.17868   1
  -5 -10  14 1.94397 1.59385   1
  -6 -10 -14 7.16033 2.23872   2
  -6  10 -14 5.88584 2.31323   3
  -6 -10  14 13.2772 2.84613   1
   6 -10 -14 4.68420 2.27009   1
  -7 -10 -14 0.69570 1.87435   2
   0 -11 -14 5.14333 2.02458   1
   0 -11  14 5.40507 1.99034   1
  -1 -11 -14 0.49849 1.52788   1
   1 -11  14 3.81531 1.94926   1
  -1 -11  14 4.86015 2.03112   1
   1 -11 -14 4.78957 2.13307   1
   2 -11  14 7.00697 2.15609   1
   2 -11 -14 2.35376 1.85544   1
  -2 -11  14 6.43953 2.23831   1
   3 -11 -14 8.65462 2.43071   1
  -3 -11  14 11.7958 2.81844   1
  -4 -11 -14 2.70404 1.80822   2
  -4 -11  14 5.10923 2.10433   1
  -4  11 -14 0.70725 1.55991   3
   4 -11 -14 3.92831 2.25138   1
  -5 -11 -14 3.23858 1.81604   2
   5 -11 -14 -0.0831 1.86049   1
  -5 -11  14 0.30638 1.89336   1
  -5  11 -14 -0.1292 1.76514   3
  -6 -11 -14 6.94336 2.45575   2
   0 -12  14 3.53593 1.91487   1
   0 -12 -14 0.64541 1.70142   1
  -1 -12 -14 2.61573 1.78185   1
   1 -12  14 0.39927 1.45361   1
  -1 -12  14 1.43240 1.57786   1
   1 -12 -14 4.34998 2.09037   1
   2 -12  14 18.7461 3.08560   1
   2 -12 -14 16.8714 3.40243   1
  -2 -12  14 19.8448 3.35967   1
  -3 -12  14 23.6468 3.80553   1
   3 -12 -14 23.9634 3.80373   1
   0 -13  14 2.85981 1.99006   1
   0 -13 -14 4.38590 2.26690   1
   1 -13  14 13.7319 3.02848   1
  -1 -13 -14 9.30804 2.49115   1
   1 -13 -14 16.2932 3.30044   1
   2 -13  14 26.4550 3.92312   1
   0   0 -15 -0.8345 0.75418   2
   0   0 -15 0.94602 0.81492   1
   0   0 -15 -0.2689 0.57769   3
  -1   0 -15 4.49165 1.33312   2
   1   0 -15 7.59078 1.38335   1
   1   0 -15 5.10738 1.31498   2
  -2   0 -15 34.9800 2.64316   2
   2   0 -15 33.3412 2.56001   1
   2   0 -15 34.4004 2.46052   2
   3   0 -15 166.988 6.08763   1
   3   0 -15 164.865 5.65583   2
  -3   0 -15 167.938 5.66029   2
  -4   0 -15 16.6560 2.13623   2
   4   0 -15 26.6521 2.64793   2
   4   0 -15 24.4533 2.88084   1
   5   0 -15 121.151 5.74926   1
   5   0 -15 114.883 4.84006   2
  -5   0 -15 115.501 4.86148   2
   6   0 -15 19.3992 2.94730   1
  -6   0 -15 12.0182 2.03643   2
  -7   0 -15 97.9391 4.78484   2
   7   0 -15 95.4590 5.62100   1
   8   0 -15 15.9139 3.01489   1
  -8   0 -15 11.2979 2.20103   2
   9   0 -15 12.4648 2.79543   1
  -9   0 -15 16.7757 2.68000   2
 -10   0 -15 38.3595 4.03234   2
  10   0 -15 45.3528 5.21062   1
   0  -1 -15 89.9643 3.48397   1
   0  -1  15 93.3229 3.55533   1
   0  -1 -15 80.9272 3.79225   2
   0   1 -15 91.0433 3.18104   3
   0   1 -15 92.3595 3.93467   2
   1  -1  15 3.03518 0.80437   1
   1   1 -15 4.72715 0.82083   3
  -1  -1 -15 3.07563 0.85053   1
   1   1 -15 5.51059 1.33460   2
  -1  -1 -15 4.73178 1.28095   2
   1  -1 -15 3.96710 1.09441   1
   1  -1 -15 5.56585 1.35332   2
  -1  -1  15 4.11259 1.19326   1
  -1   1 -15 3.58894 0.96718   3
  -1   1 -15 5.84650 1.36578   2
  -2  -1 -15 45.8614 2.97121   2
   2   1 -15 47.8021 2.90416   2
  -2  -1  15 42.3386 2.95597   1
  -2   1 -15 45.0205 2.75266   3
   2  -1 -15 46.7835 2.83406   2
  -2   1 -15 48.7776 3.03075   2
   2  -1 -15 47.0551 2.93183   1
  -3  -1 -15 1.46401 1.03624   2
   3   1 -15 2.40084 1.10554   2
   3  -1 -15 2.61775 1.31037   1
   3  -1 -15 2.93673 1.12584   2
  -3   1 -15 2.36431 1.20351   2
  -3   1 -15 1.93035 1.07441   3
   4   1 -15 46.9952 3.08601   2
  -4  -1 -15 51.8531 3.21088   2
   4   1 -15 47.1663 3.43159   1
  -4   1 -15 44.5312 3.02114   2
   4  -1 -15 51.2065 3.50020   1
   4  -1 -15 50.9235 3.09880   2
   5   1 -15 79.9997 4.58815   1
  -5  -1 -15 74.4256 4.01745   2
   5  -1 -15 74.3863 3.84117   2
   5  -1 -15 76.8459 4.63075   1
  -5   1 -15 80.4312 3.94004   2
  -6  -1 -15 36.6155 3.35433   2
   6   1 -15 46.0852 4.37513   1
  -6   1 -15 40.0064 3.06208   2
   6  -1 -15 41.8724 4.22874   1
  -7  -1 -15 5.03857 1.73740   2
   7   1 -15 6.11261 2.02921   1
  -7   1 -15 5.84894 1.64096   2
   7  -1 -15 8.63903 2.30649   1
  -8  -1 -15 19.7323 2.86551   2
   8  -1 -15 26.2102 3.71388   1
  -8   1 -15 22.1116 2.81200   2
  -9  -1 -15 1.22136 1.41516   2
  -9   1 -15 3.01421 1.74354   3
  -9  -1  15 4.74896 2.21770   1
   9  -1 -15 4.23990 2.14444   1
  -9   1 -15 4.33668 1.70126   2
 -10  -1 -15 26.9606 3.47991   2
 -10   1 -15 19.3391 3.38759   3
 -10  -1  15 25.4912 4.11643   1
  10  -1 -15 21.1041 3.74297   1
 -11  -1 -15 32.0714 4.04001   2
  11  -1 -15 32.7421 4.86325   1
 -11   1 -15 29.6063 4.20415   3
 -11  -1  15 37.1046 4.85565   1
   0  -2 -15 2.65091 1.03277   1
   0  -2 -15 4.10032 1.25430   2
   0  -2  15 1.42407 0.81223   1
   0   2 -15 3.16647 0.90671   3
   0   2 -15 1.73799 1.06987   2
   1  -2  15 84.3576 3.09459   1
  -1  -2 -15 81.8986 3.09975   1
   1   2 -15 85.2457 2.77066   3
   1   2 -15 81.7542 3.78376   2
  -1  -2 -15 74.6723 3.66335   2
  -1   2 -15 87.1704 3.46719   3
   1  -2 -15 81.5351 3.70163   1
  -1   2 -15 82.8787 3.78517   2
   1  -2 -15 82.2065 3.80825   2
  -1  -2  15 83.1457 3.72088   1
   2   2 -15 17.8507 2.11178   2
  -2  -2 -15 16.1843 2.04919   2
   2  -2 -15 25.2467 2.63395   1
  -2  -2  15 21.6699 2.43125   1
  -2   2 -15 17.9875 2.06082   3
   2  -2 -15 20.5293 2.21990   2
  -2   2 -15 17.9010 2.07258   2
   3   2 -15 41.6937 2.92660   2
  -3  -2 -15 45.3185 2.98467   2
  -3  -2  15 45.7190 3.18598   1
   3  -2 -15 43.0765 2.79337   2
  -3   2 -15 38.1839 2.88300   3
   3  -2 -15 41.3216 3.11526   1
  -3   2 -15 38.1951 2.68599   2
  -4  -2 -15 80.5322 4.12200   2
   4   2 -15 87.9602 4.24479   2
   4  -2 -15 85.4795 3.89992   2
  -4   2 -15 88.0287 4.03859   2
  -4  -2  15 77.8318 4.44382   1
   4  -2 -15 84.8888 4.62180   1
  -4   2 -15 80.8729 4.29545   3
  -5  -2 -15 144.481 5.71114   2
  -5   2 -15 135.134 5.90153   3
  -5   2 -15 139.980 5.26039   2
  -5  -2  15 139.538 6.38783   1
   5  -2 -15 140.597 5.27458   2
   5  -2 -15 145.482 6.38916   1
  -6  -2 -15 36.5771 3.48472   2
   6  -2 -15 38.8425 4.10795   1
  -6   2 -15 39.9661 3.06115   2
  -6   2 -15 34.1534 3.68221   3
  -6  -2  15 40.3565 4.12267   1
  -7  -2 -15 16.2006 2.53949   2
  -7  -2  15 17.0526 3.00083   1
   7  -2 -15 19.0705 3.14344   1
  -7   2 -15 21.0125 3.06539   3
  -7   2 -15 17.6715 2.44867   2
  -8  -2 -15 17.5926 2.68217   2
  -8   2 -15 23.6558 3.45196   3
  -8  -2  15 26.5430 3.74889   1
  -8   2 -15 22.6171 2.81542   2
   8  -2 -15 21.7045 3.40288   1
  -9  -2 -15 9.20279 2.29065   2
   9  -2 -15 8.88166 2.53456   1
  -9   2 -15 11.0741 2.61695   3
  -9  -2  15 8.74488 2.69392   1
 -10  -2 -15 10.1360 2.47763   2
  10  -2 -15 9.02552 2.80506   1
 -10  -2  15 9.15387 2.70556   1
 -10   2 -15 10.7881 2.75969   3
 -11  -2 -15 7.22061 2.48242   2
  11  -2 -15 1.87780 2.38264   1
 -11  -2  15 8.28001 2.66487   1
   0  -3 -15 91.2790 3.79743   1
   0  -3 -15 96.6641 4.18689   2
   0  -3  15 100.549 3.85226   1
   0   3 -15 90.6661 4.02933   2
   0   3 -15 97.7472 3.53214   3
   1   3 -15 78.6026 3.73858   2
   1  -3  15 74.8820 3.05561   1
  -1  -3 -15 76.1762 3.72008   2
   1   3 -15 72.6252 2.82643   3
  -1  -3 -15 73.1483 3.14281   1
  -1   3 -15 81.0589 3.74715   2
  -1   3 -15 74.8244 3.35853   3
  -1  -3  15 76.8193 3.62343   1
   1  -3 -15 73.2996 3.67198   2
   1  -3 -15 79.2668 3.74828   1
  -2  -3 -15 113.048 4.66259   2
   2   3 -15 121.690 4.76305   2
   2  -3 -15 111.664 4.79757   1
  -2   3 -15 114.855 4.48356   2
   2  -3 -15 109.663 4.40997   2
  -2  -3  15 112.272 4.73734   1
  -2   3 -15 114.525 4.51761   3
   3   3 -15 80.3261 3.98823   2
  -3  -3 -15 86.3500 4.16098   2
  -3   3 -15 79.7139 3.79429   2
  -3  -3  15 82.6975 4.28545   1
  -3   3 -15 84.2142 4.12058   3
   3  -3 -15 88.4800 4.51588   1
   3  -3 -15 84.1274 3.80204   2
  -4  -3 -15 38.9694 2.91805   2
  -4  -3  15 42.6214 3.87238   1
  -4   3 -15 40.6921 2.98186   2
   4  -3 -15 34.3666 2.90226   2
  -4   3 -15 41.4193 3.15714   3
   4  -3 -15 37.2727 3.60527   1
  -5  -3 -15 101.600 4.78921   2
   5  -3 -15 106.574 4.41569   2
  -5   3 -15 103.095 4.42257   2
  -5   3 -15 105.810 5.16478   3
  -5  -3  15 102.185 5.43329   1
   5  -3 -15 106.698 5.51612   1
  -6  -3 -15 16.6793 2.45779   2
   6  -3 -15 13.3352 2.56934   1
  -6  -3  15 19.3352 2.95045   1
   6  -3 -15 22.2637 2.42925   2
  -6   3 -15 18.2140 2.31029   2
  -6   3 -15 20.7156 2.88087   3
  -7  -3 -15 18.0799 2.73815   2
   7  -3 -15 26.8165 3.63623   1
  -7  -3  15 27.7288 3.68248   1
  -7   3 -15 23.4683 3.14248   3
  -8  -3 -15 6.58497 1.89886   2
  -8   3 -15 6.23545 2.11379   3
  -8  -3  15 8.23341 2.29152   1
   8  -3 -15 9.50546 2.52020   1
  -9  -3 -15 47.5257 4.45509   2
  -9   3 -15 44.1427 4.65198   3
   9  -3 -15 55.3760 5.58327   1
  -9  -3  15 52.3569 5.37014   1
 -10  -3 -15 17.1412 3.03002   2
  10  -3 -15 18.8453 3.66965   1
 -10  -3  15 13.2986 3.08417   1
 -10   3 -15 12.8999 3.05430   3
 -11  -3 -15 2.44536 1.80398   2
   0  -4 -15 2.67649 1.15063   1
   0  -4  15 4.07186 1.18984   1
   0   4 -15 5.75825 1.20060   3
   0  -4 -15 5.08090 1.41208   2
   0   4 -15 5.48534 1.42551   2
  -1  -4 -15 32.2180 2.33921   1
   1   4 -15 32.8170 2.07166   3
   1  -4  15 27.6353 2.12917   1
   1   4 -15 28.4103 2.68428   2
  -1  -4 -15 30.4742 2.77428   2
  -1   4 -15 33.3664 2.54708   2
  -1  -4  15 33.7231 2.57722   1
   1  -4 -15 24.9601 2.64141   1
   1  -4 -15 28.9480 2.69784   2
  -1   4 -15 35.6838 2.46030   3
   2   4 -15 127.065 5.05256   2
  -2  -4 -15 122.032 4.97086   2
   2  -4 -15 126.266 4.75771   2
  -2  -4  15 131.627 5.20333   1
  -2   4 -15 118.446 4.76168   3
   2  -4 -15 119.296 5.18368   1
  -2   4 -15 126.864 4.74433   2
  -3  -4 -15 79.1654 4.05584   2
   3   4 -15 91.2499 4.38152   2
   3  -4 -15 86.9836 3.91255   2
   3  -4 -15 85.1993 4.62950   1
  -3   4 -15 97.6590 4.39512   3
  -3   4 -15 88.0860 3.90760   2
  -3  -4  15 89.2589 4.56743   1
  -4  -4 -15 93.2708 4.56080   2
  -4  -4  15 90.9286 4.86419   1
   4  -4 -15 102.189 4.19148   2
   4  -4 -15 93.4008 5.03963   1
  -4   4 -15 101.463 4.30006   2
  -4   4 -15 96.4911 4.78542   3
  -5  -4 -15 16.4562 2.37788   2
  -5   4 -15 15.9361 2.19920   2
   5  -4 -15 15.1657 2.69883   1
  -5   4 -15 18.0408 2.59403   3
  -5  -4  15 17.4328 2.69945   1
   5  -4 -15 21.8419 2.27910   2
  -6  -4 -15 35.9526 3.59087   2
  -6  -4  15 30.4369 3.62348   1
   6  -4 -15 35.1949 3.97820   1
  -6   4 -15 36.7016 3.77108   3
  -7  -4 -15 99.8022 5.30713   2
   7  -4 -15 96.8346 5.96084   1
  -7  -4  15 97.6861 5.75133   1
  -8  -4 -15 10.4661 2.40288   2
  -8  -4  15 14.6815 3.09435   1
   8  -4 -15 22.3859 3.53087   1
  -8   4 -15 20.4815 3.21866   3
  -9  -4 -15 17.6772 2.97226   2
  -9  -4  15 12.0788 2.82930   1
   9  -4 -15 12.0800 2.86324   1
  -9   4 -15 13.3274 2.83241   3
 -10  -4 -15 4.24119 1.94630   2
 -10   4 -15 6.43275 2.41064   3
  10  -4 -15 4.26879 2.39078   1
 -10  -4  15 7.31708 2.66808   1
   0   5 -15 29.5199 2.29176   3
   0   5 -15 34.4544 2.55253   2
   0  -5 -15 27.0357 2.63594   2
   0  -5 -15 35.3854 2.74396   1
   0  -5  15 33.0154 2.57304   1
  -1  -5 -15 17.7371 2.07892   1
  -1  -5 -15 18.9196 2.30731   2
   1   5 -15 14.4370 2.10106   2
   1  -5  15 17.8098 2.12945   1
  -1  -5  15 14.3195 2.06756   1
  -1   5 -15 14.0796 1.90970   3
   1  -5 -15 19.1424 2.38453   1
   1  -5 -15 15.6595 2.13917   2
  -1   5 -15 16.3475 2.06792   2
   2  -5  15 50.2562 2.82031   1
  -2  -5 -15 51.3071 3.30301   2
   2   5 -15 39.4143 2.93226   2
   2  -5 -15 48.3776 3.37911   1
  -2  -5  15 50.0531 3.37762   1
  -2   5 -15 43.0610 3.00516   3
  -2   5 -15 48.6595 2.97290   2
   2  -5 -15 48.1894 2.98800   2
  -3  -5 -15 26.4452 2.86666   2
   3  -5 -15 26.7281 2.54379   2
  -3  -5  15 26.5230 3.07597   1
   3  -5 -15 27.3746 3.18690   1
  -3   5 -15 29.6258 3.01441   3
  -3   5 -15 28.8436 2.61193   2
  -4  -5 -15 2.96408 1.37087   2
  -4   5 -15 4.60252 1.39064   2
   4  -5 -15 6.26060 1.44765   2
  -4  -5  15 3.22304 1.56924   1
  -4   5 -15 4.64546 1.59569   3
   4  -5 -15 4.35799 1.78315   1
  -5  -5 -15 45.5808 3.48538   2
  -5  -5  15 41.7421 3.97192   1
  -5   5 -15 41.6007 3.85268   3
   5  -5 -15 45.4927 4.34128   1
  -6  -5 -15 41.7881 3.82439   2
   6  -5 -15 48.9844 4.89342   1
  -6  -5  15 44.8887 4.32381   1
  -6   5 -15 44.8649 4.22484   3
  -7  -5 -15 22.5479 3.04076   2
  -7   5 -15 23.6112 3.27803   3
  -7  -5  15 25.9477 3.64838   1
   7  -5 -15 23.6936 3.56545   1
  -8  -5 -15 14.3485 2.67857   2
  -8   5 -15 16.5074 2.99463   3
   8  -5 -15 14.8767 3.03518   1
  -8  -5  15 17.3207 3.17265   1
  -9  -5 -15 10.2918 2.57904   2
  -9  -5  15 8.49085 2.60708   1
   9  -5 -15 4.74498 2.20953   1
  -9   5 -15 5.93945 2.24661   3
 -10  -5 -15 8.12042 2.47196   2
  10  -5 -15 11.1646 3.13407   1
 -10  -5  15 10.6490 2.91912   1
 -10   5 -15 11.8603 2.86864   3
   0   6 -15 177.930 6.03578   2
   0  -6 -15 171.525 6.01530   2
   0   6 -15 180.317 5.89045   3
   0  -6  15 183.576 6.30666   1
   0  -6 -15 180.428 6.34637   1
  -1  -6 -15 84.6765 4.21703   2
  -1  -6 -15 90.5343 4.14405   1
   1   6 -15 85.7814 4.15606   2
   1  -6  15 84.4900 4.07874   1
  -1   6 -15 89.2229 3.99762   2
   1  -6 -15 85.1077 4.06299   2
  -1   6 -15 88.8030 4.20659   3
  -1  -6  15 87.3326 4.41383   1
   2  -6  15 21.4257 2.32180   1
  -2  -6 -15 21.5502 2.63650   2
   2  -6 -15 16.6165 2.53022   1
  -2  -6  15 19.3879 2.63090   1
  -2   6 -15 20.6974 2.56251   3
  -2   6 -15 19.0646 2.17395   2
   2  -6 -15 17.2513 2.20094   2
  -3  -6 -15 13.9823 2.16739   2
  -3   6 -15 10.6941 2.02752   3
  -3   6 -15 12.2700 1.87268   2
   3  -6 -15 11.7816 2.36134   1
  -3  -6  15 10.6197 2.16414   1
  -4  -6 -15 7.01096 1.74643   2
  -4  -6  15 4.29645 1.64276   1
  -4   6 -15 5.70272 1.68709   3
   4  -6 -15 8.80459 2.18180   1
  -5  -6 -15 32.4715 3.50148   2
  -5   6 -15 30.9915 3.45802   3
   5  -6 -15 33.2618 3.88197   1
  -5  -6  15 36.2493 3.90605   1
  -6  -6 -15 9.33020 2.18567   2
  -6  -6  15 11.5780 2.47539   1
   6  -6 -15 3.67202 1.83134   1
  -6   6 -15 10.8265 2.32127   3
  -7  -6 -15 32.6678 3.73891   2
  -7   6 -15 35.7754 3.97702   3
   7  -6 -15 38.1869 4.52019   1
  -7  -6  15 37.8202 4.25218   1
  -8  -6 -15 5.11168 2.06649   2
   8  -6 -15 4.90132 2.29045   1
  -8   6 -15 6.27678 2.24655   3
  -8  -6  15 7.33644 2.43146   1
  -9  -6 -15 2.37045 1.72245   2
   9  -6 -15 -0.2733 1.67977   1
  -9   6 -15 -0.0044 1.66562   3
  -9  -6  15 1.60635 1.95146   1
   0  -7 -15 48.2619 3.45396   1
   0  -7 -15 53.5769 3.47070   2
   0  -7  15 53.9431 3.56048   1
  -1  -7 -15 91.6240 4.47467   2
   1  -7  15 96.0200 4.54663   1
  -1  -7 -15 92.3551 4.46271   1
  -1  -7  15 98.3217 4.82812   1
  -1   7 -15 92.5475 4.46881   3
  -1   7 -15 87.8365 4.13000   2
   1  -7 -15 90.5654 4.30023   2
   1  -7 -15 92.7662 4.78560   1
  -2  -7 -15 1.26931 1.16101   2
   2  -7  15 -0.0156 0.93201   1
  -2   7 -15 2.34499 1.28167   3
  -2  -7  15 -0.2125 1.12347   1
   2  -7 -15 -0.7329 1.19084   1
  -3  -7 -15 10.4175 2.03286   2
  -3   7 -15 10.7723 2.10015   3
  -3  -7  15 10.5429 2.14587   1
   3  -7 -15 7.22313 2.10541   1
  -4  -7 -15 46.5924 3.55298   2
  -4  -7  15 45.9499 3.70852   1
  -4   7 -15 43.2425 4.01718   3
   4  -7 -15 45.1260 4.62797   1
  -5  -7 -15 7.89756 1.99268   2
  -5   7 -15 6.00334 1.83361   3
   5  -7 -15 3.02679 1.93734   1
  -5  -7  15 9.36704 2.18956   1
  -6  -7 -15 37.6100 3.88931   2
  -6   7 -15 41.0404 4.23811   3
  -6  -7  15 46.6427 4.65416   1
   6  -7 -15 42.8865 4.68715   1
  -7  -7 -15 41.0829 4.15857   2
   7  -7 -15 41.0712 4.73686   1
  -7   7 -15 36.7031 4.11977   3
  -7  -7  15 36.1707 4.17688   1
  -8  -7 -15 2.40782 1.84008   2
  -8   7 -15 3.30774 1.93721   3
  -8  -7  15 7.42185 2.48414   1
   8  -7 -15 4.70495 2.30609   1
  -9  -7 -15 3.49929 2.12244   2
  -9  -7  15 1.51890 2.03408   1
   9  -7 -15 1.67492 2.29284   1
  -9   7 -15 -0.3205 1.69072   3
   0  -8 -15 0.46859 1.20498   2
   0  -8 -15 1.49679 1.32945   1
   0  -8  15 -0.4691 1.06554   1
   1  -8  15 14.2953 2.30582   1
  -1  -8 -15 18.3863 2.47070   2
  -1  -8 -15 17.7242 2.51978   1
   1  -8 -15 14.0559 2.48070   1
  -1   8 -15 14.1773 2.31110   3
  -1  -8  15 17.1579 2.61346   1
   2  -8  15 13.7974 2.17931   1
  -2  -8 -15 7.15809 1.75325   2
   2  -8 -15 11.8519 2.34495   1
  -2   8 -15 8.87839 2.05982   3
  -2  -8  15 8.19193 2.02016   1
  -3  -8 -15 0.88174 1.31576   2
   3  -8 -15 0.53635 1.45837   1
  -3  -8  15 1.67905 1.42536   1
  -3   8 -15 0.47129 1.38910   3
  -4  -8 -15 4.48104 1.75413   2
  -4  -8  15 4.46868 1.79113   1
   4  -8 -15 6.26746 2.10136   1
  -4   8 -15 1.56562 1.62640   3
  -5  -8 -15 116.771 5.79363   2
  -5  -8  15 109.059 6.03186   1
   5  -8 -15 110.857 6.45460   1
  -5   8 -15 106.806 5.75532   3
  -6  -8 -15 0.62277 1.53766   2
   6  -8 -15 -0.5403 1.53603   1
  -6   8 -15 -0.7285 1.30664   3
  -6  -8  15 1.39235 1.38148   1
  -7  -8 -15 5.62989 2.05197   2
   7  -8 -15 7.34682 2.51651   1
  -7  -8  15 4.97502 2.28749   1
  -7   8 -15 5.62624 2.25293   3
  -8  -8 -15 7.77563 2.47856   2
  -8  -8  15 6.79569 2.38044   1
  -8   8 -15 2.72542 2.06718   3
   8  -8 -15 3.57468 2.15397   1
   0  -9 -15 64.7853 4.32475   1
   0  -9  15 55.3382 4.01573   1
  -1  -9 -15 82.8121 4.71422   1
   1  -9  15 80.2248 4.65635   1
   1  -9 -15 81.4320 5.02956   1
  -1  -9  15 81.2587 4.91569   1
  -2  -9 -15 12.6419 2.28295   2
   2  -9  15 18.4683 2.69784   1
  -2  -9  15 14.6783 2.66035   1
  -2   9 -15 16.4264 2.55377   3
   2  -9 -15 16.4642 2.86640   1
  -3  -9 -15 30.1712 3.36944   2
   3  -9 -15 28.2963 3.59808   1
  -3  -9  15 30.4847 3.72169   1
  -3   9 -15 32.2793 3.59647   3
  -4  -9 -15 31.0146 3.53035   2
   4  -9 -15 27.8079 3.83766   1
  -4   9 -15 25.3244 3.42321   3
  -4  -9  15 37.3603 4.12608   1
  -5  -9 -15 0.68689 1.40404   2
   5  -9 -15 1.05140 1.72574   1
  -5  -9  15 -0.8521 1.34972   1
  -5   9 -15 1.54862 1.52332   3
  -6  -9 -15 26.5146 3.52934   2
   6  -9 -15 27.4472 4.12408   1
  -6  -9  15 39.4520 4.55433   1
  -6   9 -15 39.4494 4.39195   3
  -7  -9 -15 18.7323 3.32582   2
   7  -9 -15 15.7928 3.38291   1
  -7  -9  15 14.8562 3.17049   1
  -7   9 -15 12.3714 2.78703   3
   0 -10 -15 26.2508 3.51879   1
   0 -10  15 23.6222 3.33012   1
   1 -10  15 29.8701 3.48240   1
  -1 -10 -15 42.6606 4.14666   1
  -1 -10  15 33.2667 3.77328   1
   1 -10 -15 31.7664 3.77985   1
   2 -10  15 13.1225 2.55358   1
  -2 -10  15 9.77181 2.32082   1
   2 -10 -15 11.1228 2.57009   1
  -3 -10 -15 18.2911 2.86296   2
  -3 -10  15 18.5614 3.06974   1
  -3  10 -15 12.5086 2.50890   3
   3 -10 -15 18.1782 3.27554   1
  -4 -10 -15 4.03579 1.81011   2
   4 -10 -15 2.92791 2.13812   1
  -4  10 -15 2.03066 1.89883   3
  -4 -10  15 5.30892 1.98951   1
  -5 -10 -15 -0.0346 1.46423   2
   5 -10 -15 1.06581 1.78831   1
  -5 -10  15 -1.0039 1.28337   1
  -5  10 -15 -2.0470 1.37694   3
  -6 -10 -15 12.5916 2.71979   2
  -6 -10  15 11.0438 2.78928   1
   6 -10 -15 7.94473 2.51748   1
  -6  10 -15 12.4601 2.73508   3
   0 -11  15 1.26604 1.48875   1
   0 -11 -15 -0.7909 1.56334   1
   1 -11  15 10.2001 2.38697   1
  -1 -11 -15 7.07393 2.32139   1
  -1 -11  15 11.3451 2.65664   1
   1 -11 -15 7.93399 2.51855   1
   2 -11  15 12.6612 2.54882   1
   2 -11 -15 20.2616 3.29679   1
  -2 -11  15 16.8761 3.13318   1
   3 -11 -15 1.56034 1.90098   1
  -3 -11  15 -0.2536 1.50058   1
  -4 -11 -15 6.00333 2.27325   2
  -4  11 -15 9.48331 2.55674   3
   4 -11 -15 4.39230 2.26950   1
  -4 -11  15 2.38881 1.94795   1
  -5 -11 -15 2.04651 1.98298   2
   5 -11 -15 1.43705 1.99716   1
  -5 -11  15 0.70192 1.84631   1
  -5  11 -15 3.89249 2.02672   3
  -6 -11 -15 6.67208 2.29756   2
   0 -12 -15 5.54583 2.22553   1
   0 -12  15 5.34479 2.15082   1
   1 -12  15 3.20945 1.89175   1
   1 -12 -15 1.22254 1.77285   1
  -1 -12  15 3.31833 1.79680   1
   2 -12  15 12.6023 2.70631   1
  -2 -12  15 10.5579 2.76485   1
   2 -12 -15 9.48833 2.50882   1
  -3 -12  15 3.47192 2.23463   1
   3 -12 -15 0.40151 1.60484   1
   0 -13 -15 13.5957 3.05946   1
   1 -13  15 1.13179 1.88741   1
   0   0 -16 0.81531 0.64677   3
   0   0 -16 1.25634 0.94841   2
  -1   0 -16 97.0633 4.25982   2
   1   0 -16 98.6298 4.01649   1
   1   0 -16 102.507 4.32267   2
  -2   0 -16 139.529 5.20902   2
   2   0 -16 136.380 5.05131   2
   2   0 -16 131.227 5.13414   1
   3   0 -16 66.0305 3.58701   2
   3   0 -16 64.1696 3.71613   1
  -3   0 -16 56.6236 3.32268   2
   4   0 -16 7.75924 1.59758   2
  -4   0 -16 7.59944 1.76425   2
   4   0 -16 11.2022 2.11825   1
   5   0 -16 5.10898 1.84571   1
  -5   0 -16 5.91910 1.66302   2
   5   0 -16 5.42877 1.48674   2
  -6   0 -16 1.90658 1.39964   2
   6   0 -16 2.44433 1.65151   1
  -7   0 -16 0.26928 1.20701   2
   7   0 -16 -0.7718 1.31153   1
  -8   0 -16 1.19094 1.49026   2
   8   0 -16 -1.3927 1.36145   1
   9   0 -16 5.12599 2.14218   1
  -9   0 -16 6.99579 2.13293   2
  10   0 -16 5.34957 2.56903   1
 -10   0 -16 5.76587 2.16228   2
   0  -1 -16 2.89280 0.99217   1
   0   1 -16 1.43777 0.98962   2
   0  -1 -16 1.11437 0.92597   2
   0  -1  16 1.23188 0.75661   1
   0   1 -16 0.65737 0.65651   3
  -1  -1 -16 1.21717 0.77545   1
   1   1 -16 0.71361 0.96827   2
  -1  -1 -16 2.63954 1.22123   2
   1  -1  16 1.52229 0.74812   1
  -1   1 -16 1.59040 1.06731   2
   1  -1 -16 2.04606 1.05343   2
  -1   1 -16 0.16533 0.79351   3
  -1  -1  16 2.68045 1.02883   1
   1  -1 -16 3.47624 1.22389   1
   2   1 -16 65.5428 3.46855   2
  -2  -1 -16 66.7876 3.51264   2
   2  -1 -16 56.7908 3.35642   1
  -2   1 -16 59.5020 3.44787   2
  -2  -1  16 55.3735 3.42411   1
   2  -1 -16 59.2978 3.26948   2
  -2   1 -16 67.1309 3.36109   3
  -3  -1 -16 141.736 5.41750   2
   3   1 -16 147.796 5.38719   2
   3  -1 -16 135.045 5.19243   2
  -3   1 -16 139.734 5.40106   3
  -3   1 -16 142.521 5.24223   2
   3  -1 -16 145.472 5.78361   1
  -4  -1 -16 218.508 7.11703   2
   4   1 -16 225.759 7.20275   2
   4   1 -16 217.740 7.64809   1
   4  -1 -16 238.637 7.09415   2
  -4   1 -16 223.672 7.00634   2
   4  -1 -16 224.636 7.81787   1
   5   1 -16 72.1378 4.55997   1
  -5  -1 -16 80.4781 4.25143   2
   5   1 -16 85.2616 4.34898   2
   5  -1 -16 74.7466 3.96652   2
   5  -1 -16 74.1150 4.57327   1
  -5   1 -16 71.6072 3.99396   2
  -6  -1 -16 128.583 5.48809   2
   6   1 -16 135.547 6.42796   1
   6  -1 -16 128.443 6.43775   1
  -6   1 -16 131.589 5.42659   2
  -7  -1 -16 2.23438 1.52397   2
   7  -1 -16 1.88039 1.64888   1
  -7   1 -16 1.11223 1.40848   2
  -8  -1 -16 4.10888 1.74954   2
   8  -1 -16 1.16445 1.67881   1
  -8   1 -16 1.94561 1.52289   2
  -8   1 -16 0.91506 1.45957   3
  -9  -1 -16 6.19346 1.97370   2
  -9   1 -16 6.47345 2.05145   2
  -9  -1  16 8.75286 2.64518   1
  -9   1 -16 8.02883 2.27805   3
   9  -1 -16 4.72169 2.09302   1
 -10  -1 -16 0.26901 1.60050   2
  10  -1 -16 -2.0117 1.47436   1
 -10   1 -16 -0.4545 1.40395   3
 -10  -1  16 3.48372 2.21193   1
 -11  -1 -16 5.14980 2.26921   2
   0  -2 -16 61.0631 3.00868   1
   0  -2 -16 62.8056 3.46709   2
   0  -2  16 64.6174 3.02428   1
   0   2 -16 63.8184 3.50707   2
   0   2 -16 62.4510 2.75464   3
  -1  -2 -16 13.7781 1.92765   2
   1  -2  16 14.1149 1.56098   1
  -1  -2 -16 13.5090 1.52530   1
   1   2 -16 13.2860 1.92482   2
   1  -2 -16 15.4812 1.99089   1
   1  -2 -16 15.5330 2.06912   2
  -1  -2  16 16.7108 2.05249   1
  -1   2 -16 16.4829 1.86407   3
  -1   2 -16 17.3712 2.17657   2
  -2  -2 -16 36.5096 2.71789   2
   2   2 -16 30.6297 2.82064   2
  -2   2 -16 36.2862 2.61207   3
   2  -2 -16 37.2888 2.85236   1
   2  -2 -16 36.7176 2.63330   2
  -2  -2  16 40.5153 2.91983   1
  -2   2 -16 38.9392 2.83987   2
  -3  -2 -16 104.119 4.59500   2
   3   2 -16 110.802 4.69681   2
   3  -2 -16 100.528 4.31794   2
  -3  -2  16 112.900 5.02831   1
  -3   2 -16 106.889 4.69174   3
  -3   2 -16 109.217 4.53307   2
   3  -2 -16 105.194 4.91478   1
  -4  -2 -16 73.9913 4.01782   2
   4   2 -16 68.7006 3.88268   2
  -4  -2  16 63.4349 4.08405   1
   4  -2 -16 77.4111 3.79406   2
  -4   2 -16 62.7539 3.53592   2
   4  -2 -16 73.1189 4.39332   1
  -4   2 -16 63.2847 3.89867   3
  -5  -2 -16 13.9467 2.28438   2
   5  -2 -16 16.0819 2.16921   2
  -5   2 -16 16.3084 2.29683   2
  -5  -2  16 15.4816 2.68052   1
  -5   2 -16 15.0960 2.42019   3
   5  -2 -16 14.3598 2.53800   1
  -6  -2 -16 64.2466 4.05452   2
   6  -2 -16 61.0773 3.62412   2
  -6   2 -16 66.7235 4.39244   3
   6  -2 -16 61.2872 4.48063   1
  -6  -2  16 60.3121 4.42739   1
  -6   2 -16 66.9180 3.81566   2
  -7  -2 -16 11.4348 2.28921   2
  -7   2 -16 13.5297 2.68866   3
   7  -2 -16 10.3221 2.49126   1
  -7   2 -16 10.5372 2.07467   2
  -7  -2  16 14.3576 2.77245   1
  -8  -2 -16 8.96517 2.22106   2
   8  -2 -16 9.38534 2.58624   1
  -8   2 -16 10.5056 2.55458   3
  -8   2 -16 13.4592 2.34792   2
  -8  -2  16 11.1800 2.73470   1
  -9  -2 -16 17.8304 2.87233   2
  -9   2 -16 18.0331 3.08976   3
   9  -2 -16 19.1260 3.46672   1
  -9  -2  16 16.2984 3.27933   1
 -10  -2 -16 32.0436 3.85474   2
  10  -2 -16 30.1569 4.40779   1
 -10   2 -16 32.6947 4.37225   3
 -10  -2  16 30.0849 4.59742   1
 -11  -2 -16 12.2069 2.76716   2
   0   3 -16 29.6333 1.98710   3
   0  -3 -16 27.4964 2.49490   1
   0   3 -16 30.3599 2.77074   2
   0  -3  16 27.3014 2.15987   1
   0  -3 -16 27.2456 2.66901   2
   1   3 -16 67.9818 3.61654   2
  -1  -3 -16 66.0958 3.04691   1
   1  -3  16 62.7077 2.93438   1
  -1  -3 -16 67.3308 3.66344   2
   1  -3 -16 65.7312 3.54616   2
  -1   3 -16 69.1474 3.31230   3
  -1   3 -16 68.6005 3.50543   2
  -1  -3  16 66.2401 3.42756   1
   1  -3 -16 66.9860 3.56576   1
  -2  -3 -16 56.1295 3.41858   2
   2   3 -16 62.6229 3.49020   2
  -2   3 -16 61.5803 3.34598   2
   2  -3 -16 60.5396 3.37979   2
  -2   3 -16 58.9032 3.28068   3
   2  -3 -16 60.2181 3.65010   1
  -2  -3  16 67.2818 3.72991   1
   3   3 -16 0.21822 0.97841   2
  -3  -3 -16 0.87857 1.09878   2
   3  -3 -16 -0.3667 0.83288   2
  -3  -3  16 1.49862 1.30662   1
  -3   3 -16 0.57922 1.15754   2
  -3   3 -16 1.82587 1.16983   3
   3  -3 -16 1.49684 1.35840   1
  -4  -3 -16 2.01089 1.34421   2
  -4  -3  16 6.82761 1.83011   1
  -4   3 -16 5.11507 1.60032   3
   4  -3 -16 2.07508 1.45503   1
  -4   3 -16 4.69216 1.52203   2
   4  -3 -16 5.01635 1.42697   2
  -5  -3 -16 20.5501 2.65792   2
  -5   3 -16 19.4893 2.43807   2
   5  -3 -16 22.4358 3.07700   1
   5  -3 -16 23.6452 2.50243   2
  -5   3 -16 21.9154 2.83680   3
  -5  -3  16 19.6977 2.85371   1
  -6  -3 -16 13.1871 2.24251   2
  -6  -3  16 11.6751 2.44433   1
   6  -3 -16 14.5968 2.09380   2
  -6   3 -16 13.2750 2.14239   2
  -6   3 -16 16.5761 2.74339   3
   6  -3 -16 14.3565 2.80124   1
  -7  -3 -16 28.7554 3.30283   2
   7  -3 -16 34.3127 4.21237   1
  -7   3 -16 29.5395 3.69423   3
  -7  -3  16 32.4703 3.89490   1
  -8  -3 -16 6.85678 1.98208   2
   8  -3 -16 4.97576 2.09983   1
  -8   3 -16 3.41241 1.87935   3
  -8  -3  16 7.85153 2.43427   1
  -9  -3 -16 6.00612 2.17922   2
  -9  -3  16 3.72358 2.17897   1
   9  -3 -16 3.78400 1.99312   1
  -9   3 -16 5.75890 2.34668   3
 -10  -3 -16 1.90914 1.83719   2
 -10   3 -16 6.18178 2.35399   3
 -10  -3  16 3.96369 2.41297   1
  10  -3 -16 3.35652 2.30822   1
 -11  -3 -16 10.2901 2.63536   2
   0  -4 -16 262.910 7.62702   2
   0  -4  16 257.321 7.30394   1
   0  -4 -16 253.564 7.41080   1
   0   4 -16 270.171 6.94789   3
   0   4 -16 249.603 7.47139   2
   1  -4  16 7.80476 1.41165   1
  -1  -4 -16 9.77706 1.56370   1
  -1  -4 -16 8.49270 1.68155   2
   1   4 -16 9.60998 1.77018   2
  -1  -4  16 6.95908 1.55277   1
  -1   4 -16 10.2138 1.79207   2
   1  -4 -16 15.2822 2.16009   1
  -1   4 -16 7.42914 1.47401   3
   1  -4 -16 11.6310 1.88269   2
   2   4 -16 19.1536 2.41584   2
[truncated: 139,739 more chars]
